# Supplementary material for: NanoMiner — Integrative Human Transcriptomics Data Resource for Nanoparticle Research
Source: PLoS One. 2013 Jul 12;8(7):e68414. doi: 10.1371/journal.pone.0068414 (PMC3709991; doi:10.1371/journal.pone.0068414)
Supplement: Table S1 — Annotation table of the samples in NanoMiner. The annotations include GEO ID/Array Express ID, Platform information, description of preprocessing and normalization methods, summary of the dataset, citation, pubmed ID, and the detailed information of the treatment i.e. timepoint, nanoparticle dose, and nanoparticle size. (XLS) [file pone.0068414.s004.xls]

## Sheet: Sheet1
GEO ID / Array Express ID	Platform	Pre processing and normalization	Summary	Overall design	Number of samples	Access to data	Sample description	Citation	Pubmed ID	Treatment	Cell type	Timepoint	Nanoparticle dose	Nanoparticle size
GSE8608	Affymetrix GeneChip Human Genome U133 Plus 2.0 [HG-U133_Plus_2]	RMA with brainarray CDFs to ENSEMBL genes	In this study gene expression of monocyte-derived macrophages (MDM) from chronic obstructive pulmonary disease (COPD) patients and healthy subjects was investigated. MDM were treated with LPS, a combination of fine TiO2 and ultrafine Printex90 particles, or remained untreated. Experiment Overall Design: MDM of 13 COPD patients and 13 healthy subjects were incubated for four hours with LPS (10ng/m…	MDM of 13 COPD patients and 13 healthy subjects were incubated for four hours with LPS (10ng/ml), a combination of fine TiO2 and ultrafine Printex90 (32ug/ml each) or remained untreated. Cells were harvested, counted, and total RNA was isolated (phenol-chloroform extraction) for each subject individually. Total RNA of the 13 individuals from each group (COPD, healthy) and incubation (untreated, L…	6			Eder C, Frankenberger M, Stanzel F, Seidel A, Schramm KW, Ziegler-Heitbrock L, Hofer TP: Ultrafine carbon particles down-regulate CYP1B1 expression in human monocytes. Part Fibre Toxicol. 2009 Oct 16;6:27.	19835593
						GSM213464	humanMDM_COPD_untreated			-	monocyte-derived macrophages	4h	-	-
						GSM213465	humanMDM_COPD_LPS			LPS	monocyte-derived macrophages	4h	-	-
						GSM213466	humanMDM_COPD_Particles			TiO2 and Printex90	monocyte-derived macrophages	4h	32µg/ml each	NA
						GSM213500	humanMDM_Healthy_untreated			-	monocyte-derived macrophages	4h	-	-
						GSM213511	humanMDM_Healthy_LPS			LPS	monocyte-derived macrophages	4h	-	-
						GSM213512	humanMDM_Healthy_Particles			TiO2 and Printex90	monocyte-derived macrophages	4h	32µg/ml each	NA
GSE7010	Affymetrix GeneChip Human Genome U133A	RMA with brainarray CDFs to ENSEMBL genes	The purpose of this study was to characterize global gene expression in human airway epithelial cells and identify cellular pathways associated with coarse, fine and ultrafine particulate matter (PM) exposures. Ambient PM was collected in 3 different size fractions from Chapel Hill air, particles were extracted from foam or filter matrices and lyophilized. Human primary airway epithelial cells we…	Human primary epithelial cells were exposed to coarse, fine, ultrafine PM or vehicle control in culture for 6h. Three biological replicates for each treatment (coarse, fine, ultrafine, control) were conducted at (250ug/ml). 12 Affymetrix chips (HG U133A) were used.	12			Huang YC, Karoly ED, Dailey LA, Schmitt MT, Silbajoris R, Graff DW, Devlin RB. J Toxicol Environ Health A. 2011;74(5):296-312. Comparison of gene expression profiles induced by coarse, fine, and ultrafine particulate matter.	21240730
						GSM161787	89 control exp1			vehicle	primary airway epithelial cells	6h	-	-
						GSM161788	90 coarse exp1			coarse PM (Chapel Hill)	primary airway epithelial cells	6h	250μg/ml	2.5-10µm
						GSM161790	91 fine exp 1			fine PM (Chapel Hill)	primary airway epithelial cells	6h	250μg/ml	0.1-2.5µm
						GSM161791	92 UTF exp1			ultrafine PM (Chapel Hill)	primary airway epithelial cells	6h	250μg/ml	<0.1µm
						GSM161793	93 control exp2			vehicle	primary airway epithelial cells	6h	-	-
						GSM161794	94 coarse exp2			coarse PM (Chapel Hill)	primary airway epithelial cells	6h	250μg/ml	2.5-10µm
						GSM161796	95 fine exp2			fine PM (Chapel Hill)	primary airway epithelial cells	6h	250μg/ml	0.1-2.5µm
						GSM161797	96 UTF exp2			ultrafine PM (Chapel Hill)	primary airway epithelial cells	6h	250μg/ml	<0.1µm
						GSM161798	97 control exp3			vehicle	primary airway epithelial cells	6h	-	-
						GSM161800	98 coarse exp3			coarse PM (Chapel Hill)	primary airway epithelial cells	6h	250μg/ml	2.5-10µm
						GSM161801	99 fine exp3			fine PM (Chapel Hill)	primary airway epithelial cells	6h	250μg/ml	0.1-2.5µm
						GSM161802	100 UTF exp3			ultrafine PM (Chapel Hill)	primary airway epithelial cells	6h	250μg/ml	<0.1µm
GSE20677	Affymetrix GeneChip Human Genome U133 Plus 2.0 [HG-U133_Plus_2]	RMA with brainarray CDFs to ENSEMBL genes	A transcriptome-wide functional analysis of gene expression implicated multiple signaling pathways specific for Au-NP oligonucleotide complexes. Exposure to Au-NP oligonucleotide complexes is also accompanied by marked activation of immune cells.	We investigated the effect of Au-NP antisense EGFP oligonucleotide complexes on the transcriptome by expression profiling of 293T cells under four conditions and PBMCs under six conditions with the Affymetrix U133 Plus 2.0 microarray	16			Kim EY, Schulz R, Swantek P, Kunstman K et al. Gold nanoparticle-mediated gene delivery induces widespread changes in the expression of innate immunity genes. Gene Ther 2012 Mar;19(3):347-53.	21697957
						GSM518597	PBMCs_Control_1			-	PBMC	-	-	-
						GSM518598	PBMCs_AuNP_24hr_1			AuNP EGFP oligonucleotide complex	PBMC	24h	10nM	13±1nm
						GSM518599	PBMCs_AuNP_48hr_1			AuNP EGFP oligonucleotide complex	PBMC	48h	10nM	13±1nm
						GSM518600	PBMCs_Control_2			-	PBMC	-	-	-
						GSM518601	PBMCs_AuNP_24hr_2			AuNP EGFP oligonucleotide complex	PBMC	24h	10nM	13±1nm
						GSM518602	PBMCs_AuNP_48hr_2			AuNP EGFP oligonucleotide complex	PBMC	48h	10nM	13±1nm
						GSM518603	PBMCs_Oligo			Oligofectamine without oligonucleotide	PBMC	-	-	-
						GSM518604	PBMCs_Oligo_GFP			Oligofectamine with EGFP oligonucleotide	PBMC	-	-	-
						GSM518605	PBMCs_HIV			HIV infected	PBMC	-	-	-
						GSM518606	293T_Control			-	293T	-	-	-
						GSM518607	293T_AuNP_6hr			AuNP EGFP oligonucleotide complex	293T	6h	10nM	13±1nm
						GSM518608	293T_AuNP_24hr			AuNP EGFP oligonucleotide complex	293T	24h	10nM	13±1nm
						GSM518609	293T_AuNP_48hr			AuNP EGFP oligonucleotide complex	293T	48h	10nM	13±1nm
						GSM535541	PBMC_Control_3			-	PBMC	-	-	-
						GSM535542	PBMC_AuNP_24hr_3			AuNP EGFP oligonucleotide complex	PBMC	24h	10nM	13±1nm
						GSM535543	PBMC_AuNP_48hr_3			AuNP EGFP oligonucleotide complex	PBMC	48h	10nM	13±1nm
GSE4567	Affymetrix Human Genome U133 Plus 2.0	RMA with brainarray CDFs to ENSEMBL genes	Epidemiology studies have linked exposure to pollutant particles to increased cardiovascular mortality and morbidity, however, the mechanism remains unknown. In this study, we hypothesized that the ultrafine fraction of ambient pollutant particles would cause endothelial cells dysfunction. We profiled gene expression of human pulmonary artery endothelial cells (HPAEC) exposed to ultrafine Chapel …	Human pulmonary artery endothelial cell cultures were treated with Chapel Hill Ultrafine particles or with vehicle control for 4h. 4 biological replicates each for treatment (100ug/ml) and control. 8 affy chips total.				Karoly ED, Li Z, Dailey LA, Hyseni X et al. Up-regulation of tissue factor in human pulmonary artery endothelial cells after ultrafine particle exposure. Environ Health Perspect 2007 Apr;115(4):535-40.	17450221
					8	GSM101996	endothelial cell_control_rep1(53)			vehicle	pulmonary artery endothelial cell	4h	-	-
						GSM101997	endothelial cell_control_rep2(54)			vehicle	pulmonary artery endothelial cell	4h	-	-
						GSM101998	endothelial cell_control_rep3(55)			vehicle	pulmonary artery endothelial cell	4h	-	-
						GSM101999	endothelial cell_control_rep4(56)			vehicle	pulmonary artery endothelial cell	4h	-	-
						GSM102000	endothelial cell_UFP treatment_rep1(57)			ultrafine particle (Chapel Hill)	pulmonary artery endothelial cell	4h	100µg/ml	<0.1µm
						GSM102001	endothelial cell_UFP treatment_rep2(58)			ultrafine particle (Chapel Hill)	pulmonary artery endothelial cell	4h	100µg/ml	<0.1µm
						GSM102002	endothelial cell_UFP treatment_rep3(59)			ultrafine particle (Chapel Hill)	pulmonary artery endothelial cell	4h	100µg/ml	<0.1µm
						GSM102003	endothelial cell_UFP treatment_rep4(60)			ultrafine particle (Chapel Hill)	pulmonary artery endothelial cell	4h	100µg/ml	<0.1µm
GSE16727	Agilent-014850 Whole Human Genome Microarray 4x44K G4112F (Feature Number version)	Background correction with the normexp 50 method, then normalized with the loess method and linked to ENSEMBL genes	Comparison of transcriptional profiles after exposure of HaCaT cells to WC or WC-Co nanoparticles and respective amount of free cobalt in form of CoCl2 after 3 hours and 3 days of exposure. Genes responding especially to nanoparticles or leached cobalt ions should be determined.	Common refernce: pool of 80 RNA Samples of HaCaT cells (treated and not treated), Cy5 labeled. Samples: RNA of HaCaT cells treated 3 hours and 3 days with 30 µg/ml WC nanoparticles, or 33 µg/ml WC-Co nanoparticles (3 µg/ml cobalt content), or 51 µM CoCl2 (equals 3 µg/ml), or water as control, 5 biological replicates for each treatment, all samples were labeled with Cy3 and hybridised together wit…	40			Busch W, Kühnel D, Schirmer K, Scholz S. Tungsten carbide cobalt nanoparticles exert hypoxia-like effects on the gene expression level in human keratinocytes. BMC Genomics 2010 Jan 27;11:65.	20105288
						GSM419105	H2O 3h 1			H2O control	HaCaT	3h	-	-
						GSM419106	H2O 3h 2			H2O control	HaCaT	3h	-	-
						GSM419107	H2O 3h 4			H2O control	HaCaT	3h	-	-
						GSM419108	H2O 3h 5			H2O control	HaCaT	3h	-	-
						GSM419109	H2O 3h 6			H2O control	HaCaT	3h	-	-
						GSM419110	WC 3h 1			WC	HaCaT	3h	30 µg/ml	NA
						GSM419111	WC 3h 2			WC	HaCaT	3h	30 µg/ml	NA
						GSM419112	WC 3h 4			WC	HaCaT	3h	30 µg/ml	NA
						GSM419113	WC 3h 5			WC	HaCaT	3h	30 µg/ml	NA
						GSM419114	WC 3h 6			WC	HaCaT	3h	30 µg/ml	NA
						GSM419115	WC-Co 3h 1			WC-Co	HaCaT	3h	33 µg/ml	NA
						GSM419116	WC-Co 3h 2			WC-Co	HaCaT	3h	33 µg/ml	NA
						GSM419117	WC-Co 3h 4			WC-Co	HaCaT	3h	33 µg/ml	NA
						GSM419118	WC-Co 3h 5			WC-Co	HaCaT	3h	33 µg/ml	NA
						GSM419119	WC-Co 3h 6			WC-Co	HaCaT	3h	33 µg/ml	NA
						GSM419120	CoCl2 3h 1			CoCl2	HaCaT	3h	-	-
						GSM419121	CoCl2 3h 2			CoCl2	HaCaT	3h	-	-
						GSM419122	CoCl2 3h 4			CoCl2	HaCaT	3h	-	-
						GSM419123	CoCl2 3h 5			CoCl2	HaCaT	3h	-	-
						GSM419124	CoCl2 3h 6			CoCl2	HaCaT	3h	-	-
						GSM419125	H2O 3d 1			H2O control	HaCaT	3d	-	-
						GSM419126	H2O 3d 3			H2O control	HaCaT	3d	-	-
						GSM419127	H2O 3d 4			H2O control	HaCaT	3d	-	-
						GSM419128	H2O 3d 5			H2O control	HaCaT	3d	-	-
						GSM419129	H2O 3d 6			H2O control	HaCaT	3d	-	-
						GSM419130	WC 3d 1			WC	HaCaT	3d	30 µg/ml	NA
						GSM419131	WC 3d 3			WC	HaCaT	3d	30 µg/ml	NA
						GSM419132	WC 3d 4			WC	HaCaT	3d	30 µg/ml	NA
						GSM419133	WC 3d 5			WC	HaCaT	3d	30 µg/ml	NA
						GSM419134	WC 3d 6			WC	HaCaT	3d	30 µg/ml	NA
						GSM419135	WC-Co 3d 1			WC-Co	HaCaT	3d	33 µg/ml	NA
						GSM419136	WC-Co 3d 3			WC-Co	HaCaT	3d	33 µg/ml	NA
						GSM419137	WC-Co 3d 4			WC-Co	HaCaT	3d	33 µg/ml	NA
						GSM419138	WC-Co 3d 5			WC-Co	HaCaT	3d	33 µg/ml	NA
						GSM419139	WC-Co 3d 6			WC-Co	HaCaT	3d	33 µg/ml	NA
						GSM419140	CoCl2 3d 1			CoCl2	HaCaT	3d	-	-
						GSM419141	CoCl2 3d 3			CoCl2	HaCaT	3d	-	-
						GSM419142	CoCl2 3d 4			CoCl2	HaCaT	3d	-	-
						GSM419143	CoCl2 3d 5			CoCl2	HaCaT	3d	-	-
						GSM419144	CoCl2 3d 6			CoCl2	HaCaT	3d	-	-
GSE16425	Agilent-014850 Whole Human Genome Microarray 4x44K G4112F (Probe Name version)	Background correction with the normexp 50 method, then normalized with the quantile method and linked to ENSEMBL genes.	Gene expression profiling of the human keratinocytes cell line (HaCaT) exposure to ultrafine, fine, and submicron TiO2 particles were employed to gain insights into the molecular events.	Three types of bulk TiO2 anatase particles, ST-01(average primary particle size= 7nm, specific surface area = 316m2/g), ST-21(20nm and 66m2/g), and ST-41(200nm and 10m2/g) used in this study were purchased from Ishihara Sangyo Kaisha Ltd., Japan. TiO2 particles were dispersed and size-fractionated in Dulbecco’s modified Eagle’s medium (DMEM) . TiO2 particles was dispersed in heat-inactivated feta…	36			Fujita K, Horie M, Kato H, Endoh S et al. Effects of ultrafine TiO2 particles on gene expression profile in human keratinocytes without illumination: involvement of extracellular matrix and cell adhesion. Toxicol Lett 2009 Dec 15;191(2-3):109-17.	19695317
						GSM412732	HaCaT_Control_2h_1			control	HaCaT	2h	-	-
						GSM412734	HaCaT_Control_6h_1			control	HaCaT	6h	-	-
						GSM412736	HaCaT_Control_24h_1			control	HaCaT	24h	-	-
						GSM412738	HaCaT_TiO2(T-7)_2h_1			TiO2(T-7)	HaCaT	2h	NA	7nm
						GSM412739	HaCaT_TiO2(T-7)_6h_1			TiO2(T-7)	HaCaT	6h	NA	7nm
						GSM412740	HaCaT_TiO2(T-7)_24h_1			TiO2(T-7)	HaCaT	24h	NA	7nm
						GSM412741	HaCaT_TiO2(T-20)_2h_1			TiO2(T-20)	HaCaT	2h	NA	20nm
						GSM412742	HaCaT_TiO2(T-20)_6h_1			TiO2(T-20)	HaCaT	6h	NA	20nm
						GSM412743	HaCaT_TiO2(T-20)_24h_1			TiO2(T-20)	HaCaT	24h	NA	20nm
						GSM412744	HaCaT_TiO2(T-200)_2h_1			TiO2(T-200)	HaCaT	2h	NA	200nm
						GSM412745	HaCaT_TiO2(T-200)_6h_1			TiO2(T-200)	HaCaT	6h	NA	200nm
						GSM412746	HaCaT_TiO2(T-200)_24h_1			TiO2(T-200)	HaCaT	24h	NA	200nm
						GSM412732	HaCaT_Control_2h_2			control	HaCaT	2h	-	-
						GSM412734	HaCaT_Control_6h_2			control	HaCaT	6h	-	-
						GSM412736	HaCaT_Control_24h_2			control	HaCaT	24h	-	-
						GSM412738	HaCaT_TiO2(T-7)_2h_2			TiO2(T-7)	HaCaT	2h	NA	7nm
						GSM412739	HaCaT_TiO2(T-7)_6h_2			TiO2(T-7)	HaCaT	6h	NA	7nm
						GSM412740	HaCaT_TiO2(T-7)_24h_2			TiO2(T-7)	HaCaT	24h	NA	7nm
						GSM412741	HaCaT_TiO2(T-20)_2h_2			TiO2(T-20)	HaCaT	2h	NA	20nm
						GSM412742	HaCaT_TiO2(T-20)_6h_2			TiO2(T-20)	HaCaT	6h	NA	20nm
						GSM412743	HaCaT_TiO2(T-20)_24h_2			TiO2(T-20)	HaCaT	24h	NA	20nm
						GSM412744	HaCaT_TiO2(T-200)_2h_2			TiO2(T-200)	HaCaT	2h	NA	200nm
						GSM412745	HaCaT_TiO2(T-200)_6h_2			TiO2(T-200)	HaCaT	6h	NA	200nm
						GSM412746	HaCaT_TiO2(T-200)_24h_2			TiO2(T-200)	HaCaT	24h	NA	200nm
						GSM412732	HaCaT_Control_2h_3			control	HaCaT	2h	-	-
						GSM412734	HaCaT_Control_6h_3			control	HaCaT	6h	-	-
						GSM412736	HaCaT_Control_24h_3			control	HaCaT	24h	-	-
						GSM412738	HaCaT_TiO2(T-7)_2h_3			TiO2(T-7)	HaCaT	2h	NA	7nm
						GSM412739	HaCaT_TiO2(T-7)_6h_3			TiO2(T-7)	HaCaT	6h	NA	7nm
						GSM412740	HaCaT_TiO2(T-7)_24h_3			TiO2(T-7)	HaCaT	24h	NA	7nm
						GSM412741	HaCaT_TiO2(T-20)_2h_3			TiO2(T-20)	HaCaT	2h	NA	20nm
						GSM412742	HaCaT_TiO2(T-20)_6h_3			TiO2(T-20)	HaCaT	6h	NA	20nm
						GSM412743	HaCaT_TiO2(T-20)_24h_3			TiO2(T-20)	HaCaT	24h	NA	20nm
						GSM412744	HaCaT_TiO2(T-200)_2h_3			TiO2(T-200)	HaCaT	2h	NA	200nm
						GSM412745	HaCaT_TiO2(T-200)_6h_3			TiO2(T-200)	HaCaT	6h	NA	200nm
						GSM412746	HaCaT_TiO2(T-200)_24h_3			TiO2(T-200)	HaCaT	24h	NA	200nm
GSE12405	Agilent-014850 Whole Human Genome Microarray 4x44K G4112F (Feature Number version)	Background correction with the normexp 50 method, then normalized with the loess method and linked to ENSEMBL genes	Purpose: The use of dendrimers for biomedical applications has emerged with promising results. 2G-NN16 is a carbosilane dendrimer with sixteen positive charges per molecule tested to be capable to bind and release antisense oligonucleotides (ODNs) and small interference RNA (siRNA) in vitro. In spite of low cytotoxicity observed for these dendrimers, little is known about cellular changes they pr…	This experiment was designed to identify changes in gene expression profiles in human macrophages by exposure to carboxilane dendrimer 2G-NN16. Macrophages from three donnors were isolated and cultured for 5 hours alone or in presence of 5µM 2G-NN16 complexed with or without siRNA (Dendriplex).. Control samples were labeled with Cy3 and dendrimer and dendriplex samples with Cy5. For each donnor C…	6			Gras R, Almonacid L, Ortega P, Serramia MJ et al. Changes in gene expression pattern of human primary macrophages induced by carbosilane dendrimer 2G-NN16. Pharm Res 2009 Mar;26(3):577-86. Gras R, Almonacid L, Ortega P, Serramia MJ et al. Erratum: changes in gene expression pattern of human primary macrophages induced by carbosilane dendrimer 2G-NN16. Pharm Res 2011 Mar;28(3):683-7.	19034630, 21116693
						GSM311264	Macrophage_dendrimer_comparison1			2G-NN16 carbosilane dendrimer	Primary Macrophages	5h	5µM	NA
						GSM311272	Macrophage_dendrimer_comparison2			2G-NN16 carbosilane dendrimer	Primary Macrophages	5h	5µM	NA
						GSM311297	Macrophage_dendrimer_comparison3			2G-NN16 carbosilane dendrimer	Primary Macrophages	5h	5µM	NA
						GSM311298	Macrophage_dendriplex_comparison1			2G-NN16 carbosilane dendrimer complexed with a random siRNA	Primary Macrophages	5h	5µM	NA
						GSM311299	Macrophage_dendriplex_comparison2			2G-NN16 carbosilane dendrimer complexed with a random siRNA	Primary Macrophages	5h	5µM	NA
						GSM311306	Macrophage_dendriplex_comparison3			2G-NN16 carbosilane dendrimer complexed with a random siRNA	Primary Macrophages	5h	5µM	NA
GSE14452	Affymetrix Human HG-Focus Target Array	RMA with brainarray CDFs to ENSEMBL genes	From the result of the gene expression analyses of human hepatoma cell line, HepG2, a number of genes associated with cell proliferation and DNA repair were distinctively up-regulated by Ag-nanoparticle exposure, suggesting that Ag-nanoparticles might stimulate cell proliferation and DNA damage, which are considered to be mechanisms playing an important role for carcinogenesis and tumor progressi…	In this study, we examined the gene expression alteration in human hepatoma cell line, HepG2 following exposures of silver nanoparticles (7-10 nm), polysthylene nanoparticles (15 nm) and silver carbonate using DNA microarray with 8795 human genes. Furthermore, we also performed the DNA microarray analyses for the cells exposed to silver nanoparticle in the presence of 5mM N-acetyl-L-cysteine to e…	15			Kawata K, Osawa M, Okabe S. In vitro toxicity of silver nanoparticles at noncytotoxic doses to HepG2 human hepatoma cells. Environ Sci Technol. 2009 Aug 1;43(15):6046-51.	19731716
						GSM361148	HepG2_control rep4			control	HepG2	-	-	-
						GSM361149	HepG2_control rep5			control	HepG2	-	-	-
						GSM361150	HepG2_control rep6			control	HepG2	-	-	-
						GSM361151	HepG2_nanoAg rep1			Ag-NP	HepG2	24h	1mg/L	7-10nm
						GSM361152	HepG2_nanoAg rep2			Ag-NP	HepG2	24h	1mg/L	7-10nm
						GSM361153	HepG2_nanoAg rep3			Ag-NP	HepG2	24h	1mg/L	7-10nm
						GSM361154	HepG2_PS rep1			PS-NP	HepG2	24h	1mg/L	15nm
						GSM361155	HepG2_PS rep2			PS-NP	HepG2	24h	1mg/L	15nm
						GSM361156	HepG2_PS rep3			PS-NP	HepG2	24h	1mg/L	15nm
						GSM361157	HepG2_Ag2CO3 rep1			Ag2CO3	HepG2	-	-	-
						GSM361158	HepG2_Ag2CO3 rep2			Ag2CO3	HepG2	-	-	-
						GSM361159	HepG2_Ag2CO3 rep3			Ag2CO3	HepG2	-	-	-
						GSM361160	HepG2_nanoAg+cysteine rep1			Ag-NP + cysteine	HepG2	24h	1mg/L	7-10nm
						GSM361161	HepG2_nanoAg+cysteine rep2			Ag-NP + cysteine	HepG2	24h	1mg/L	7-10nm
						GSM361162	HepG2_nanoAg+cysteine rep3			Ag-NP + cysteine	HepG2	24h	1mg/L	7-10nm
E-TABM-679	Illumina HumanHT-12 v3.0 Expression BeadChip	No raw data available, normalized values extracted from Array Express and linked to ENSEMBL genes	To screen for novel toxicological endpoints of nano-particles, we conducted an in vitro expression profiling study using human lung epithelial cells (A549). To identify effects that are specific to size or chemical origin, we compared gene expression of A549 cells treated with nano-sized and micro-sized particulates of two chemical origins (carbon and silica) to the control (untreated) cells.		36
						A549 culture 14	silica micro			silica micro	A549	NA	133µg/cm2	NA
						A549 culture 28	carbon black			carbon black	A549	NA	66.5µg/cm2	NA
						A549 culture 18	silica micro			silica micro	A549	NA	133µg/cm2	NA
						A549 culture 24	silica nano			silica nano	A549	NA	66.5µg/cm2	NA
						A549 culture 8	silica quartz			silica quartz	A549	NA	133µg/cm2	NA
						A549 culture 30	carbon black			carbon black	A549	NA	66.5µg/cm2	NA
						A549 culture 20	silica nano			silica nano	A549	NA	66.5µg/cm2	NA
						A549 culture 16	silica micro			silica micro	A549	NA	133µg/cm2	NA
						A549 culture 27	carbon black			carbon black	A549	NA	66.5µg/cm2	NA
						A549 culture 13	silica micro			silica micro	A549	NA	133µg/cm2	NA
						A549 culture 29	carbon black			carbon black	A549	NA	66.5µg/cm2	NA
						A549 culture 12	silica quartz			silica quartz	A549	NA	133µg/cm2	NA
						A549 culture 32	multiwall carbon nano tubes			multiwall carbon nano tubes	A549	NA	133µg/cm2	NA
						A549 culture 21	silica nano			silica nano	A549	NA	66.5µg/cm2	NA
						A549 culture 34	multiwall carbon nano tubes			multiwall carbon nano tubes	A549	NA	133µg/cm2	NA
						A549 culture 25	carbon black			carbon black	A549	NA	66.5µg/cm2	NA
						A549 culture 5	none			none	A549	NA	-	-
						A549 culture 10	silica quartz			silica quartz	A549	NA	133µg/cm2	NA
						A549 culture 17	silica micro			silica micro	A549	NA	133µg/cm2	NA
						A549 culture 23	silica nano			silica nano	A549	NA	66.5µg/cm2	NA
						A549 culture 35	multiwall carbon nano tubes			multiwall carbon nano tubes	A549	NA	133µg/cm2	NA
						A549 culture 1	none			none	A549	NA	-	-
						A549 culture 6	none			none	A549	NA	-	-
						A549 culture 4	none			none	A549	NA	-	-
						A549 culture 7	silica quartz			silica quartz	A549	NA	133µg/cm2	NA
						A549 culture 36	multiwall carbon nano tubes			multiwall carbon nano tubes	A549	NA	133µg/cm2	NA
						A549 culture 9	silica quartz			silica quartz	A549	NA	133µg/cm2	NA
						A549 culture 33	multiwall carbon nano tubes			multiwall carbon nano tubes	A549	NA	133µg/cm2	NA
						A549 culture 26	carbon black			carbon black	A549	NA	66.5µg/cm2	NA
						A549 culture 2	none			none	A549	NA	-	-
						A549 culture 11	silica quartz			silica quartz	A549	NA	133µg/cm2	NA
						A549 culture 22	silica nano			silica nano	A549	NA	66.5µg/cm2	NA
						A549 culture 3	none			none	A549	NA	-	-
						A549 culture 19	silica nano			silica nano	A549	NA	66.5µg/cm2	NA
						A549 culture 15	silica micro			silica micro	A549	NA	133µg/cm2	NA
						A549 culture 31	multiwall carbon nano tubes			multiwall carbon nano tubes	A549	NA	133µg/cm2	NA
GSE39444_GSE39316	Illumina Sentrix HumanHT-12 Expression BeadChips, version 3	The R package lumi and the quantile normalization algorithm		HMDM, MDDC, Jurkat	90
						GSM960767	MDDC_rep1_ctr_6h_0			no treatment	MDDC	6h	-	-
						GSM960768	MDDC_rep1_ctr_24h_0			no treatment	MDDC	24h	-	-
						GSM960769	MDDC_rep1_TiO2_6h_1			TiO2	MDDC	6h	1µg/ml	21nm
						GSM960770	MDDC_rep1_TiO2_6h_10			TiO2	MDDC	6h	10µg/ml	21nm
						GSM960771	MDDC_rep1_TiO2_24h_1			TiO2	MDDC	24h	1µg/ml	21nm
						GSM960772	MDDC_rep1_TiO2_24h_10			TiO2	MDDC	24h	10µg/ml	21nm
						GSM960773	MDDC_rep1_ZnO_6h_1			ZnO	MDDC	6h	1µg/ml	10 ± 2nm
						GSM960774	MDDC_rep1_ZnO_6h_10			ZnO	MDDC	6h	10µg/ml	10 ± 2nm
						GSM960775	MDDC_rep1_ZnO_24h_1			ZnO	MDDC	24h	1µg/ml	10 ± 2nm
						GSM960776	MDDC_rep1_ZnO_24h_10			ZnO	MDDC	24h	10µg/ml	10 ± 2nm
						GSM960777	MDDC_rep2_ctr_6h_0			no treatment	MDDC	6h	-	-
						GSM960778	MDDC_rep2_ctr_24h_0			no treatment	MDDC	24h	-	-
						GSM960779	MDDC_rep2_TiO2_6h_1			TiO2	MDDC	6h	1µg/ml	21nm
						GSM960780	MDDC_rep2_TiO2_6h_10			TiO2	MDDC	6h	10µg/ml	21nm
						GSM960781	MDDC_rep2_TiO2_24h_1			TiO2	MDDC	24h	1µg/ml	21nm
						GSM960782	MDDC_rep2_TiO2_24h_10			TiO2	MDDC	24h	10µg/ml	21nm
						GSM960783	MDDC_rep2_ZnO_6h_1			ZnO	MDDC	6h	1µg/ml	10 ± 2nm
						GSM960784	MDDC_rep2_ZnO_6h_10			ZnO	MDDC	6h	10µg/ml	10 ± 2nm
						GSM960785	MDDC_rep2_ZnO_24h_1			ZnO	MDDC	24h	1µg/ml	10 ± 2nm
						GSM960786	MDDC_rep2_ZnO_24h_10			ZnO	MDDC	24h	10µg/ml	10 ± 2nm
						GSM960787	MDDC_rep3_ctr_6h_0			no treatment	MDDC	6h	-	-
						GSM960788	MDDC_rep3_ctr_24h_0			no treatment	MDDC	24h	-	-
						GSM960789	MDDC_rep3_TiO2_6h_1			TiO2	MDDC	6h	1µg/ml	21nm
						GSM960790	MDDC_rep3_TiO2_6h_10			TiO2	MDDC	6h	10µg/ml	21nm
						GSM960791	MDDC_rep3_TiO2_24h_1			TiO2	MDDC	24h	1µg/ml	21nm
						GSM960792	MDDC_rep3_TiO2_24h_10			TiO2	MDDC	24h	10µg/ml	21nm
						GSM960793	MDDC_rep3_ZnO_6h_1			ZnO	MDDC	6h	1µg/ml	10 ± 2nm
						GSM960794	MDDC_rep3_ZnO_6h_10			ZnO	MDDC	6h	10µg/ml	10 ± 2nm
						GSM960795	MDDC_rep3_ZnO_24h_1			ZnO	MDDC	24h	1µg/ml	10 ± 2nm
						GSM960796	MDDC_rep3_ZnO_24h_10			ZnO	MDDC	24h	10µg/ml	10 ± 2nm
						GSM960797	HMDC_rep1_ctr_6h_0			no treatment	HMDM	6h	-	-
						GSM960798	HMDC_rep1_ctr_24h_0			no treatment	HMDM	24h	-	-
						GSM960799	HMDC_rep1_TiO2_6h_1			TiO2	HMDM	6h	1µg/ml	21nm
						GSM960800	HMDC_rep1_TiO2_6h_10			TiO2	HMDM	6h	10µg/ml	21nm
						GSM960801	HMDC_rep1_TiO2_24h_1			TiO2	HMDM	24h	1µg/ml	21nm
						GSM960802	HMDC_rep1_TiO2_24h_10			TiO2	HMDM	24h	10µg/ml	21nm
						GSM960803	HMDC_rep1_ZnO_6h_1			ZnO	HMDM	6h	1µg/ml	10 ± 2nm
						GSM960804	HMDC_rep1_ZnO_6h_10			ZnO	HMDM	6h	10µg/ml	10 ± 2nm
						GSM960805	HMDC_rep1_ZnO_24h_1			ZnO	HMDM	24h	1µg/ml	10 ± 2nm
						GSM960806	HMDC_rep1_ZnO_24h_10			ZnO	HMDM	24h	10µg/ml	10 ± 2nm
						GSM960807	HMDC_rep2_ctr_6h_0			no treatment	HMDM	6h	-	-
						GSM960808	HMDC_rep2_ctr_24h_0			no treatment	HMDM	24h	-	-
						GSM960809	HMDC_rep2_TiO2_6h_1			TiO2	HMDM	6h	1µg/ml	21nm
						GSM960810	HMDC_rep2_TiO2_6h_10			TiO2	HMDM	6h	10µg/ml	21nm
						GSM960811	HMDC_rep2_TiO2_24h_1			TiO2	HMDM	24h	1µg/ml	21nm
						GSM960812	HMDC_rep2_TiO2_24h_10			TiO2	HMDM	24h	10µg/ml	21nm
						GSM960813	HMDC_rep2_ZnO_6h_1			ZnO	HMDM	6h	1µg/ml	10 ± 2nm
						GSM960814	HMDC_rep2_ZnO_6h_10			ZnO	HMDM	6h	10µg/ml	10 ± 2nm
						GSM960815	HMDC_rep2_ZnO_24h_1			ZnO	HMDM	24h	1µg/ml	10 ± 2nm
						GSM960816	HMDC_rep2_ZnO_24h_10			ZnO	HMDM	24h	10µg/ml	10 ± 2nm
						GSM960817	HMDC_rep3_ctr_6h_0			no treatment	HMDM	6h	-	-
						GSM960818	HMDC_rep3_ctr_24h_0			no treatment	HMDM	24h	-	-
						GSM960819	HMDC_rep3_TiO2_6h_1			TiO2	HMDM	6h	1µg/ml	21nm
						GSM960820	HMDC_rep3_TiO2_6h_10			TiO2	HMDM	6h	10µg/ml	21nm
						GSM960821	HMDC_rep3_TiO2_24h_1			TiO2	HMDM	24h	1µg/ml	21nm
						GSM960822	HMDC_rep3_TiO2_24h_10			TiO2	HMDM	24h	10µg/ml	21nm
						GSM960823	HMDC_rep3_ZnO_6h_1			ZnO	HMDM	6h	1µg/ml	10 ± 2nm
						GSM960824	HMDC_rep3_ZnO_6h_10			ZnO	HMDM	6h	10µg/ml	10 ± 2nm
						GSM960825	HMDC_rep3_ZnO_24h_1			ZnO	HMDM	24h	1µg/ml	10 ± 2nm
						GSM960826	HMDC_rep3_ZnO_24h_10			ZnO	HMDM	24h	10µg/ml	10 ± 2nm
						GSM960827	Jurkat_rep1_ctr_6h_0			no treatment	Jurkat	6h	-	-
						GSM960828	Jurkat_rep1_ctr_24h_0			no treatment	Jurkat	24h	-	-
						GSM960829	Jurkat_rep1_TiO2_6h_1			TiO2	Jurkat	6h	1µg/ml	21nm
						GSM960830	Jurkat_rep1_TiO2_6h_10			TiO2	Jurkat	6h	10µg/ml	21nm
						GSM960831	Jurkat_rep1_TiO2_24h_1			TiO2	Jurkat	24h	1µg/ml	21nm
						GSM960832	Jurkat_rep1_TiO2_24h_10			TiO2	Jurkat	24h	10µg/ml	21nm
						GSM960833	Jurkat_rep1_ZnO_6h_1			ZnO	Jurkat	6h	1µg/ml	10 ± 2nm
						GSM960834	Jurkat_rep1_ZnO_6h_10			ZnO	Jurkat	6h	10µg/ml	10 ± 2nm
						GSM960835	Jurkat_rep1_ZnO_24h_1			ZnO	Jurkat	24h	1µg/ml	10 ± 2nm
						GSM960836	Jurkat_rep1_ZnO_24h_10			ZnO	Jurkat	24h	10µg/ml	10 ± 2nm
						GSM960837	Jurkat_rep2_ctr_6h_0			no treatment	Jurkat	6h	-	-
						GSM960838	Jurkat_rep2_ctr_24h_0			no treatment	Jurkat	24h	-	-
						GSM960839	Jurkat_rep2_TiO2_6h_1			TiO2	Jurkat	6h	1µg/ml	21nm
						GSM960840	Jurkat_rep2_TiO2_6h_10			TiO2	Jurkat	6h	10µg/ml	21nm
						GSM960841	Jurkat_rep2_TiO2_24h_1			TiO2	Jurkat	24h	1µg/ml	21nm
						GSM960842	Jurkat_rep2_TiO2_24h_10			TiO2	Jurkat	24h	10µg/ml	21nm
						GSM960843	Jurkat_rep2_ZnO_6h_1			ZnO	Jurkat	6h	1µg/ml	10 ± 2nm
						GSM960844	Jurkat_rep2_ZnO_6h_10			ZnO	Jurkat	6h	10µg/ml	10 ± 2nm
						GSM960845	Jurkat_rep2_ZnO_24h_1			ZnO	Jurkat	24h	1µg/ml	10 ± 2nm
						GSM960846	Jurkat_rep2_ZnO_24h_10			ZnO	Jurkat	24h	10µg/ml	10 ± 2nm
						GSM960847	Jurkat_rep3_ctr_6h_0			no treatment	Jurkat	6h	-	-
						GSM960848	Jurkat_rep3_ctr_24h_0			no treatment	Jurkat	24h	-	-
						GSM960849	Jurkat_rep3_TiO2_6h_1			TiO2	Jurkat	6h	1µg/ml	21nm
						GSM960850	Jurkat_rep3_TiO2_6h_10			TiO2	Jurkat	6h	10µg/ml	21nm
						GSM960851	Jurkat_rep3_TiO2_24h_1			TiO2	Jurkat	24h	1µg/ml	21nm
						GSM960852	Jurkat_rep3_TiO2_24h_10			TiO2	Jurkat	24h	10µg/ml	21nm
						GSM960853	Jurkat_rep3_ZnO_6h_1			ZnO	Jurkat	6h	1µg/ml	10 ± 2nm
						GSM960854	Jurkat_rep3_ZnO_6h_10			ZnO	Jurkat	6h	10µg/ml	10 ± 2nm
						GSM960855	Jurkat_rep3_ZnO_24h_1			ZnO	Jurkat	24h	1µg/ml	10 ± 2nm
						GSM960856	Jurkat_rep3_ZnO_24h_10			ZnO	Jurkat	24h	10µg/ml	10 ± 2nm
GSE39444_GSE39330	Affymetrix GeneChip Human Genome U219	RMA with brainarray CDFs to ENSEMBL genes		HMDM, MDDC, Jurkat	71
			Ti-Zn-HMDM_1-10_Donor1_ZnO_24h_G03			GSM961223	HMDM_rep1_ZnO-1_24h_10			ZnO-1	HMDM	24h	10µg/ml	10 ± 2nm
			Ti-Zn-HMDM_1-1_Donor1_no_treatment_6h_F12			GSM961226	HMDM_rep1_ctr_6h_0			no treatment	HMDM	6h	-	-
			Ti-Zn-HMDM_1-2_Donor1_no_treatment_24h_G01			GSM961228	HMDM_rep1_ctr_24h_0			no treatment	HMDM	24h	-	-
			Ti-Zn-HMDM_1-8_Donor1_ZnO_6h_G02			GSM961230	HMDM_rep1_ZnO-1_6h_10			ZnO-1	HMDM	6h	10µg/ml	10 ± 2nm
			Ti-Zn-HMDM_2-10_Donor2_ZnO_24h_G07			GSM961232	HMDM_rep2_ZnO-1_24h_10			ZnO-1	HMDM	24h	10µg/ml	10 ± 2nm
			Ti-Zn-HMDM_2-1_Donor2_no_treatment_6h_G04			GSM961234	HMDM_rep2_ctr_6h_0			no treatment	HMDM	6h	-	-
			Ti-Zn-HMDM_2-2_Donor2_no_treatment_24h_G05			GSM961236	HMDM_rep2_ctr_24h_0			no treatment	HMDM	24h	-	-
			Ti-Zn-HMDM_2-8_Donor2_ZnO_6h_G06			GSM961238	HMDM_rep2_ZnO-1_6h_10			ZnO-1	HMDM	6h	10µg/ml	10 ± 2nm
			Ti-Zn-HMDM_3-10_Donor3_ZnO_24h_G11			GSM961240	HMDM_rep3_ZnO-1_24h_10			ZnO-1	HMDM	24h	10µg/ml	10 ± 2nm
			Ti-Zn-HMDM_3-1_Donor3_no_treatment_6h_G08			GSM961242	HMDM_rep3_ctr_6h_0			no treatment	HMDM	6h	-	-
			Ti-Zn-HMDM_3-2_Donor3_no_treatment_24h_G09			GSM961245	HMDM_rep3_ctr_24h_0			no treatment	HMDM	24h	-	-
			Ti-Zn-HMDM_3-8_Donor3_ZnO_6h_G10			GSM961247	HMDM_rep3_ZnO-1_6h_10			ZnO-1	HMDM	6h	10µg/ml	10 ± 2nm
			Donor_10_Replicate3_no_treatment_24h_E08			GSM961249	MDDC_rep4_ctr_24h_0			no treatment	MDDC	24h	-	-
			Donor_10_Replicate3_ZnO_24h_E09			GSM961252	MDDC_rep4_ZnO-1_24h_10			ZnO-1	MDDC	24h	10µg/ml	10 ± 2nm
			Donor_11_Replicate4_no_treatment_24h_E10			GSM961254	MDDC_rep5_ctr_24h_0			no treatment	MDDC	24h	-	-
			Donor_11_Replicate4_ZnO_24h_E11			GSM961256	MDDC_rep5_ZnO-1_24h_10			ZnO-1	MDDC	24h	10µg/ml	10 ± 2nm
			Donor_5_Replicate1_no_treatment_24h_E04			GSM961258	MDDC_rep6_ctr_24h_0			no treatment	MDDC	24h	-	-
			Donor_5_Replicate1_ZnO_24h_E05			GSM961260	MDDC_rep6_ZnO-1_24h_10			ZnO-1	MDDC	24h	10µg/ml	10 ± 2nm
			Donor_6_Replicate2_no_treatment_24h_E06			GSM961263	MDDC_rep7_ctr_24h_0			no treatment	MDDC	24h	-	-
			Donor_6_Replicate2_ZnO_24h_E07			GSM961265	MDDC_rep7_ZnO-1_24h_10			ZnO-1	MDDC	24h	10µg/ml	10 ± 2nm
			Ti-Zn-DC_1-10_Donor1_ZnO_24h_F03			GSM961267	MDDC_rep1_ZnO-1_24h_10			ZnO-1	MDDC	24h	10µg/ml	10 ± 2nm
			Ti-Zn-DC_1-1_Donor1_no_treatment_6h_E12			GSM961269	MDDC_rep1_ctr_6h_0			no treatment	MDDC	6h	-	-
			Ti-Zn-DC_1-2_Donor1_no_treatment_24h_F01			GSM961272	MDDC_rep1_ctr_24h_0			no treatment	MDDC	24h	-	-
			Ti-Zn-DC_1-8_Donor1_ZnO_6h_F02			GSM961275	MDDC_rep1_ZnO-1_6h_10			ZnO-1	MDDC	6h	10µg/ml	10 ± 2nm
			Ti-Zn-DC_2-10_Donor2_ZnO_24h_F07			GSM961278	MDDC_rep2_ZnO-1_24h_10			ZnO-1	MDDC	24h	10µg/ml	10 ± 2nm
			Ti-Zn-DC_2-1_Donor2_no_treatment_6h_F04			GSM961280	MDDC_rep2_ctr_6h_0			no treatment	MDDC	6h	-	-
			Ti-Zn-DC_2-2_Donor2_no_treatment_24h_F05			GSM961282	MDDC_rep2_ctr_24h_0			no treatment	MDDC	24h	-	-
			Ti-Zn-DC_2-8_Donor2_ZnO_6h_F06			GSM961284	MDDC_rep2_ZnO-1_6h_10			ZnO-1	MDDC	6h	10µg/ml	10 ± 2nm
			Ti-Zn-DC_3-10_Donor3_ZnO_24h_F11			GSM961287	MDDC_rep3_ZnO-1_24h_10			ZnO-1	MDDC	24h	10µg/ml	10 ± 2nm
			Ti-Zn-DC_3-1_Donor3_no_treatment_6h_F08			GSM961289	MDDC_rep3_ctr_6h_0			no treatment	MDDC	6h	-	-
			Ti-Zn-DC_3-2_Donor3_no_treatment_24h_F09			GSM961291	MDDC_rep3_ctr_24h_0			no treatment	MDDC	24h	-	-
			Ti-Zn-DC_3-8_Donor3_ZnO_6h_F10			GSM961293	MDDC_rep3_ZnO-1_6h_10			ZnO-1	MDDC	6h	10µg/ml	10 ± 2nm
			142_10µg-ml_1_UC-ZnO_80_v2__24h_D04			GSM961297	Jurkat_rep4_ZnO-5_24h_10			ZnO-5	Jurkat	24h	10µg/ml	6.1±1.2nm
			142_10µg-ml_2_UC-ZnO_80_v2__24h_D05			GSM961299	Jurkat_rep5_ZnO-5_24h_10			ZnO-5	Jurkat	24h	10µg/ml	6.1±1.2nm
			142_10µg-ml_3_UC-ZnO_80_v2__24h_D06			GSM961301	Jurkat_rep6_ZnO-5_24h_10			ZnO-5	Jurkat	24h	10µg/ml	6.1±1.2nm
			145_10µg-ml_1_UC-SiO_ZnO__24h_D07			GSM961304	Jurkat_rep4_ZnO-3_24h_10			ZnO-3	Jurkat	24h	10µg/ml	28.7 ± 7.9nm
			145_10µg-ml_2_UC-SiO_ZnO__24h_D08			GSM961306	Jurkat_rep5_ZnO-3_24h_10			ZnO-3	Jurkat	24h	10µg/ml	28.7 ± 7.9nm
			145_10µg-ml_3_UC-SiO_ZnO__24h_D09			GSM961308	Jurkat_rep6_ZnO-3_24h_10			ZnO-3	Jurkat	24h	10µg/ml	28.7 ± 7.9nm
			147_10µg-ml_1_UC-FA-nanorod_ZnO__24h_D10			GSM961310	Jurkat_rep4_ZnO-9_24h_10			ZnO-9	Jurkat	24h	10µg/ml	78±10nm, 410±30nm
			147_10µg-ml_2_UC-FA-nanorod_ZnO__24h_D11			GSM961313	Jurkat_rep5_ZnO-9_24h_10			ZnO-9	Jurkat	24h	10µg/ml	78±10nm, 410±30nm
			147_10µg-ml_3_UC-FA-nanorod_ZnO__24h_D12			GSM961315	Jurkat_rep6_ZnO-9_24h_10			ZnO-9	Jurkat	24h	10µg/ml	78±10nm, 410±30nm
			149_10µg-ml_1_UC-ZnO_10_2__24h_E01			GSM961317	Jurkat_rep4_ZnO-2_24h_10			ZnO-2	Jurkat	24h	10µg/ml	18.3 ± 7.7nm
			149_10µg-ml_2_UC-ZnO_10_2__24h_E02			GSM961320	Jurkat_rep5_ZnO-2_24h_10			ZnO-2	Jurkat	24h	10µg/ml	18.3 ± 7.7nm
			149_10µg-ml_3_UC-ZnO_10_2__24h_E03			GSM961322	Jurkat_rep6_ZnO-2_24h_10			ZnO-2	Jurkat	24h	10µg/ml	18.3 ± 7.7nm
			121_100µg-ml_1_UC-ZnO_15-1__24h_D01			GSM961324	Jurkat_rep4_ZnO-4_24h_100			ZnO-4	Jurkat	24h	100µg/ml	8 ± 2.5nm
			121_100µg-ml_2_UC-ZnO_15-1__24h_D02			GSM961326	Jurkat_rep5_ZnO-4_24h_100			ZnO-4	Jurkat	24h	100µg/ml	8 ± 2.5nm
			121_100µg-ml_3_UC-ZnO_15-1__24h_D03			GSM961329	Jurkat_rep6_ZnO-4_24h_100			ZnO-4	Jurkat	24h	100µg/ml	8 ± 2.5nm
			121_10µg-ml_1_UC-ZnO_15-1__24h_C04			GSM961331	Jurkat_rep4_ZnO-4_24h_10			ZnO-4	Jurkat	24h	10µg/ml	8 ± 2.5nm
			121_10µg-ml_2_UC-ZnO_15-1__24h_C05			GSM961334	Jurkat_rep5_ZnO-4_24h_10			ZnO-4	Jurkat	24h	10µg/ml	8 ± 2.5nm
			121_10µg-ml_3_UC-ZnO_15-1__24h_C06			GSM961336	Jurkat_rep6_ZnO-4_24h_10			ZnO-4	Jurkat	24h	10µg/ml	8 ± 2.5nm
			121_25µg-ml_1_UC-ZnO_15-1__24h_C07			GSM961338	Jurkat_rep4_ZnO-4_24h_25			ZnO-4	Jurkat	24h	25µg/ml	8 ± 2.5nm
			121_25µg-ml_2_UC-ZnO_15-1__24h_C08			GSM961341	Jurkat_rep5_ZnO-4_24h_25			ZnO-4	Jurkat	24h	25µg/ml	8 ± 2.5nm
			121_25µg-ml_3_UC-ZnO_15-1__24h_C09			GSM961343	Jurkat_rep6_ZnO-4_24h_25			ZnO-4	Jurkat	24h	25µg/ml	8 ± 2.5nm
			121_50µg-ml_1_UC-ZnO_15-1__24h_C10			GSM961346	Jurkat_rep4_ZnO-4_24h_50			ZnO-4	Jurkat	24h	50µg/ml	8 ± 2.5nm
			121_50µg-ml_2_UC-ZnO_15-1__24h_C11			GSM961348	Jurkat_rep5_ZnO-4_24h_50			ZnO-4	Jurkat	24h	50µg/ml	8 ± 2.5nm
			121_50µg-ml_3_UC-ZnO_15-1__24h_C12			GSM961350	Jurkat_rep6_ZnO-4_24h_50			ZnO-4	Jurkat	24h	50µg/ml	8 ± 2.5nm
			Control_1_Untreated_24h_C01			GSM961351	Jurkat_rep4_ctr_24h_0			no treatment	Jurkat	24h	-	-
			Control_2__Untreated_24h_C02			GSM961354	Jurkat_rep5_ctr_24h_0			no treatment	Jurkat	24h	-	-
			Control_3_Untreated_24h_C03			GSM961356	Jurkat_rep6_ctr_24h_0			no treatment	Jurkat	24h	-	-
			Ti-Zn-Jurkat_1-10_Replicate1_ZnO_24h_H03			GSM961358	Jurkat_rep1_ZnO-1_24h_10			ZnO-1	Jurkat	24h	10µg/ml	10 ± 2nm
			Ti-Zn-Jurkat_1-1_Replicate1_no_treatment_6h_G12			GSM961360	Jurkat_rep1_ctr_6h_0			no treatment	Jurkat	6h	-	-
			Ti-Zn-Jurkat_1-2_Replicate1_no_treatment_24h_H01			GSM961362	Jurkat_rep1_ctr_24h_0			no treatment	Jurkat	24h	-	-
			Ti-Zn-Jurkat_1-8_Replicate1_ZnO_6h_H02			GSM961364	Jurkat_rep1_ZnO-1_6h_10			ZnO-1	Jurkat	6h	10µg/ml	10 ± 2nm
			Ti-Zn-Jurkat_2-10_Replicate2_ZnO_24h_H07			GSM961366	Jurkat_rep2_ZnO-1_24h_10			ZnO-1	Jurkat	24h	10µg/ml	10 ± 2nm
			Ti-Zn-Jurkat_2-1_Replicate2_no_treatment_6h_H04			GSM961369	Jurkat_rep2_ctr_6h_0			no treatment	Jurkat	6h	-	-
			Ti-Zn-Jurkat_2-2_Replicate2_no_treatment_24h_H05			GSM961371	Jurkat_rep2_ctr_24h_0			no treatment	Jurkat	24h	-	-
			Ti-Zn-Jurkat_2-8_Replicate2_ZnO_6h_H06			GSM961373	Jurkat_rep2_ZnO-1_6h_10			ZnO-1	Jurkat	6h	10µg/ml	10 ± 2nm
			Ti-Zn-Jurkat_3-10_Replicate3_ZnO_24h_H11			GSM961375	Jurkat_rep3_ZnO-1_24h_10			ZnO-1	Jurkat	24h	10µg/ml	10 ± 2nm
			Ti-Zn-Jurkat_3-1_Replicate3_no_treatment_6h_H08			GSM961377	Jurkat_rep3_ctr_6h_0			no treatment	Jurkat	6h	-	-
			Ti-Zn-Jurkat_3-2_Replicate3_no_treatment_24h_H09			GSM961379	Jurkat_rep3_ctr_24h_0			no treatment	Jurkat	24h	-	-
			Ti-Zn-Jurkat_3-8_Replicate3_ZnO_6h_H10			GSM961381	Jurkat_rep3_ZnO-1_6h_10			ZnO-1	Jurkat	6h	10µg/ml	10 ± 2nm
GSE33278	Agilent-014850 Whole Human Genome Microarray 4x44K G4112F	Background correction with the normexp 50 method, then normalized with the loess method and linked to ENSEMBL genes	This study proposes a molecular mechanism for lung epithelial A549 cell response to copper oxide nanoparticles (CuO-NPs) related to Cu ions released from CuO-NPs. Cells that survived exposure to CuO-NPs arrested the cell cycle as a result of the downregulation of proliferating cell nuclear antigen (PCNA), cell division control 2 (CDC2), cyclin B1 (CCNB1), target protein for Xklp2 (TPX2), and auro…		6			Hanagata N, Zhuang F, Connolly S, Li J et al. Molecular responses of human lung epithelial cells to the toxicity of copper oxide nanoparticles inferred from whole genome expression analysis. ACS Nano 2011 Dec 27;5(12):9326-38.	22077320
						GSM823363_AH21H_1-4	CuO			CuO	A549	24h	25µg/ml	50nm
						GSM823363_AH21L_1-4	CuO			CuO	A549	24h	25µg/ml	50nm
						GSM823363_AH21M_1-4	CuO			CuO	A549	24h	25µg/ml	50nm
						GSM823363_AH22H_1-4	CuO			CuO	A549	24h	25µg/ml	50nm
						GSM823363_AH22L_1-4	CuO			CuO	A549	24h	25µg/ml	50nm
						GSM823363_AH22M_1-4	CuO			CuO	A549	24h	25µg/ml	50nm
GSE20431	Spotted oligonucleotide array, Operon Human Genome Array-Ready Oligo Set[tm] (AROS) Version 4.0 (GPL7088 and GPL10077)	Background correction with the normexp 50 method, then normalized with the loess method and linked to ENSEMBL genes	Superparamagnetic iron oxide nanoparticles (SPION) are increasingly used to label human bone marrow stromal cells (BMSCs, also called mesenchymal stem cells) to monitor their fate by in vivo MRI and histology after Prussian blue (PB) staining. SPION-labeling appears to be safe as assessed by in vitro differentiation of BMSCs, however, we chose to determine the effect of labeling on maintaining th…	We performed gene expression profiling on BMSCs labeled with FePro. For comparison, gene express profiling on human embryonic stem cells (hES) WA09 (H9) and adult cells: fibroblasts (FB), endothelial cells (EC) and smooth muscle cells (SMC) was conducted. Total RNA from PBMCs pooled from six normal donors was amplified into aRNA to serve as the reference.	15			Balakumaran A, Pawelczyk E, Ren J, Sworder B et al. Superparamagnetic iron oxide nanoparticles labeling of bone marrow stromal (mesenchymal) cells does not affect their "stemness". PLoS One 2010 Jul 7;5(7):e11462.	20628641
						GSM307451	LFB - mAdbID:94275			-	lung fibroblasts	-	-	-
						GSM307454	WA09 (H9) - replicate 1 - mAdbID:94280			-	embryonic stem cells WA09 (H9)	-	-	-
						GSM307458	UASMC - mAdbID:94287			-	Umbilical Artery Smooth Muscle Cells (UASMC)	-	-	-
						GSM307462	HUVEC - mAdbID:94292			-	Human Umbilical Vein Endothelial Cells (HUVEC)	-	-	-
						GSM307465	WA09 (H9) - replicate 2 - mAdbID:94793			-	embryonic stem cells WA09 (H9)	-	-	-
						GSM307466	WA09 (H9) - replicate 3 - mAdbID:94794			-	embryonic stem cells WA09 (H9)	-	-	-
						GSM512438	BMSC-gold - repeat 2 - mAdbID:105986			Gold Nanoparticle	bone marrow stromal cells (BMSCs)	See Balakumaran et al.	2.25 x 107 NP/ml	250nm
						GSM512439	BMSC-FePro - repeat 2 - mAdbID:105987			FePro	bone marrow stromal cells (BMSCs)	See Balakumaran et al.	final 50:3µg/ml
						GSM512440	BMSC-control - repeat 3 - mAdbID:105989			-	bone marrow stromal cells (BMSCs)		-	-
						GSM512441	BMSC-gold - repeat 3 - mAdbID:105990			Gold Nanoparticle	bone marrow stromal cells (BMSCs)	See Balakumaran et al.	2.25 x 107 NP/ml	250nm
						GSM512442	BMSC-control - repeat 1 - mAdbID:105991			-	bone marrow stromal cells (BMSCs)		-	-
						GSM512443	BMSC-FePro - repeat 3 - mAdbID:105992			FePro	bone marrow stromal cells (BMSCs)	See Balakumaran et al.	final 50:3µg/ml
						GSM512444	BMSC-control - repeat 2 - mAdbID:105993			-	bone marrow stromal cells (BMSCs)		-	-
						GSM512445	BMSC-gold - repeat 1 - mAdbID:105994			Gold Nanoparticle	bone marrow stromal cells (BMSCs)	See Balakumaran et al.	2.25 x 107 NP/ml	250mm
						GSM512446	BMSC-FePro - repeat 1 - mAdbID:105995			FePro	bone marrow stromal cells (BMSCs)	See Balakumaran et al.	final 50:3µg/ml
GSE14910	Agilent-014850 Whole Human Genome Microarray 4x44K G4112F (Feature Number version)	Background correction with the normexp 50 method, then normalized with the loess method and linked to ENSEMBL genes	This study evaluated transcriptional effects of particles smaller than 100 nm of carbon black, SiO2, Al2O3, TiO2, ZnO and Fe203. Since there is concern that inflammation may increase the uptake and/or toxicity of ultrafine particles, we evaluated the transcriptional responses without or with a TNFα pretreatment to mimic an inflammatory state.The most pronounced transcriptional response resulted f…	Two colon cancer cell types (RKO and CaCo-2) were pretreated with 100 ng/ml BSA or TNFα for 1 hr, the media was exchanged and with media containing the nanoparticulate, and RNA was collected after 4 hrs. Generally, the RNA from 4 independent samples were combined for one sample on the microarray, the exceptions were the TNFα treated controls where 6 independent samples were combined in 2 sets of …	32			Moos PJ, Olszewski K, Honeggar M, Cassidy P et al. Responses of human cells to ZnO nanoparticles: a gene transcription study. Metallomics. 2011 Nov;3(11):1199-211.	21769377
						GSM372485	RKO_TNFα pretreatment			TNFα pretreatment; media	RKO	4h	-	-
						GSM372486	RKO_TNFα pretreatment replicate			TNFα pretreatment; media	RKO	4h	-	-
						GSM372487	RKO_TNFα pretreatment_nanoZnO			TNFα pretreatment; 5 μg/cm2 nanoZnO	RKO	4h	5 μg/cm2	8-10nm
						GSM372488	RKO_BSA pretreatment_nanoZnO			BSA pretreatment; 5 μg/cm2 nanoZnO	RKO	4h	5 μg/cm2	8-10nm
						GSM372489	RKO_TNFα pretreatment_nanoFe2O3			TNFα pretreatment; 10 μg/cm2 nanoFe2O3	RKO	4h	10 μg/cm2	3nm
						GSM372490	RKO_BSA pretreatment_nanoFe2O3			BSA pretreatment; 10 μg/cm2 nanoFe2O3	RKO	4h	10 μg/cm2	3nm
						GSM372491	RKO_TNFα pretreatment_nanoSiO2			TNFα pretreatment; 50 μg/cm2 nanoSiO2	RKO	4h	50 μg/cm2	10nm
						GSM372492	RKO_BSA pretreatment_nanoSiO2			BSA pretreatment; 50 μg/cm2 nanoSiO2	RKO	4h	50 μg/cm2	10nm
						GSM372493	RKO_TNFα pretreatment_nanoTiO2			TNFα pretreatment; 50 μg/cm2 nanoTiO2	RKO	4h	50 μg/cm2	5nm
						GSM372494	RKO_BSA pretreatment_nanoTiO2			BSA pretreatment; 50 μg/cm2 nanoTiO2	RKO	4h	50 μg/cm2	5nm
						GSM372495	RKO_TNFα pretreatment_nanoAl2O3			TNFα pretreatment; 50 μg/cm2 nanoAl2O3	RKO	4h	50 μg/cm2	NA
						GSM372496	RKO_BSA pretreatment_nanoAl2O3			BSA pretreatment; 50 μg/cm2 nanoAl2O3	RKO	4h	50 μg/cm2	NA
						GSM372497	RKO_TNFα pretreatment_nano-carbon black			TNFα pretreatment; 50 μg/cm2 nano-carbon black	RKO	4h	50 μg/cm2	NA
						GSM372498	RKO_BSA pretreatment_nano-carbon black			BSA pretreatment; 50 μg/cm2 nano-carbon black	RKO	4h	50 μg/cm2	NA
						GSM372499	CaCo2_TNFα pretreatment			TNFα pretreatment; media	CaCo2	4h	-	-
						GSM372500	CaCo2_TNFα pretreatment replicate			TNFα pretreatment; media	CaCo2	4h	-	-
						GSM372501	CaCo2_TNFα pretreatment_nanoZnO			TNFα pretreatment; 5 μg/cm2 nanoZnO	CaCo2	4h	5 μg/cm2	8-10nm
						GSM372502	CaCo2_BSA pretreatment_nanoZnO			BSA pretreatment; 5 μg/cm2 nanoZnO	CaCo2	4h	5 μg/cm2	8-10nm
						GSM372503	CaCo2_TNFα pretreatment_nanoFe2O3			TNFα pretreatment; 10 μg/cm2 nanoFe2O3	CaCo2	4h	10 μg/cm2	3nm
						GSM372504	CaCo2_BSA pretreatment_nanoFe2O3			BSA pretreatment; 10 μg/cm2 nanoFe2O3	CaCo2	4h	10 μg/cm2	3nm
						GSM372505	CaCo2_TNFα pretreatment_nanoSiO2			TNFα pretreatment; 50 μg/cm2 nanoSiO2	CaCo2	4h	50 μg/cm2	10nm
						GSM372506	CaCo2_BSA pretreatment_nanoSiO2			BSA pretreatment; 50 μg/cm2 nanoSiO2	CaCo2	4h	50 μg/cm2	10nm
						GSM372507	CaCo2_TNFα pretreatment_nanoTiO2			TNFα pretreatment; 50 μg/cm2 nanoTiO2	CaCo2	4h	50 μg/cm2	5nm
						GSM372508	CaCo2_BSA pretreatment_nanoTiO2			BSA pretreatment; 50 μg/cm2 nanoTiO2	CaCo2	4h	50 μg/cm2	5nm
						GSM372509	CaCo2_TNFα pretreatment_nanoAl2O3			TNFα pretreatment; 50 μg/cm2 nanoAl2O3	CaCo2	4h	50 μg/cm2	NA
						GSM372510	CaCo2_BSA pretreatment_nanoAl2O3			BSA pretreatment; 50 μg/cm2 nanoAl2O3	CaCo2	4h	50 μg/cm2	NA
						GSM372511	CaCo2_TNFα pretreatment_nano-carbon black			TNFα pretreatment; 50 μg/cm2 nano-carbon black	CaCo2	4h	50 μg/cm2	NA
						GSM372512	CaCo2_BSA pretreatment_nano-carbon black			BSA pretreatment; 50 μg/cm2 nano-carbon black	CaCo2	4h	50 μg/cm2	NA
						GSM372513	RKO_TNFα pretreatment_microZnO			TNFα pretreatment; 5 μg/cm2 microZnO	RKO	4h	5 μg/cm2	>44µm
						GSM372514	RKO_BSA pretreatment_microZnO			BSA pretreatment; 5 μg/cm2 microZnO	RKO	4h	5 μg/cm2	>44µm
						GSM372515	CaCo2_TNFα pretreatment_microZnO			TNFα pretreatment; 5 μg/cm2 microZnO	CaCo2	4h	5 μg/cm2	>44µm
						GSM372516	CaCo2_BSA pretreatment_microZnO			BSA pretreatment; 5 μg/cm2 microZnO	CaCo2	4h	5 μg/cm2	>44µm
GSE25167	Agilent-014850 Whole Human Genome Microarray 4x44K G4112F (Feature Number version)	Background correction with the normexp 50 method, then normalized with the loess method and linked to ENSEMBL genes	This study evaluated transcriptional effects of particles smaller than 100 nm of TiO2 and ZnO. Based on previous data in colon cancer cells (GSE14910), we evaluated HaCaT and Sk Mel-28 cells for transcriptional responses to 1 and 5 ug/cm2 ZnO, or 5 and 10 ug/cm2 TiO2. No particle controls were also included. Again, the most pronounced transcriptional response resulted from ZnO treatement with lit…	Two skin-derived cancer cell types (HaCaT and SK Mel-28) were treated with media containing the nanoparticulate, ZnCl2, or ZnO separated from the HaCaTs by a Transwell insert, and RNA was collected after 4 hrs. Generally, the RNA from 4 independent samples were combined for one microarray.	15			Moos PJ, Olszewski K, Honeggar M, Cassidy P et al. Responses of human cells to ZnO nanoparticles: a gene transcription study. Metallomics. 2011 Nov;3(11):1199-211.	21769377
						GSM618298	HaCaT_control 1			-	HaCaT	4h	-	-
						GSM618299	HaCaT_control 2			-	HaCaT	4h	-	-
						GSM618300	HaCaT_ZnO_1ug/cm2			ZnO	HaCaT	4h	1ug/cm2	8-10nm
						GSM618301	HaCaT_ZnO_5ug/cm2			ZnO	HaCaT	4h	5ug/cm2	8-10nm
						GSM618302	HaCaT_TiO2_5ug/cm2			TiO2	HaCaT	4h	5ug/cm2	5nm
						GSM618303	HaCaT_TiO2_10ug/cm2			TiO2	HaCaT	4h	10ug/cm2	5nm
						GSM618304	HaCaT_ZnCl2_100uM			ZnCl2	HaCaT	4h	-	-
						GSM618305	HaCaT_ZnO_5ug/cm2_Transwell			ZnO_Transwell	HaCaT	4h	5ug/cm2	-
						GSM618306	SK Mel-28_control 1			-	SK Mel-28	4h	-	-
						GSM618307	SK Mel-28_control 2			-	SK Mel-28	4h	-	-
						GSM618308	SK Mel-28_ZnO_1ug/cm2			ZnO	SK Mel-28	4h	1ug/cm2	8-10nm
						GSM618309	SK Mel-28_ZnO_5ug/cm2			ZnO	SK Mel-28	4h	5ug/cm2	8-10nm
						GSM618310	SK Mel-28_TiO2_5ug/cm2			TiO2	SK Mel-28	4h	5ug/cm2	5nm
						GSM618311	SK Mel-28_TiO2_10ug/cm2			TiO2	SK Mel-28	4h	10ug/cm2	5nm
						GSM618312	SK Mel-28_ZnCl2_100uM			ZnCl2	SK Mel-28	4h	-	-
