# Supplementary material for: NanoMiner — Integrative Human Transcriptomics Data Resource for Nanoparticle Research
Source: PLoS One. 2013 Jul 12;8(7):e68414. doi: 10.1371/journal.pone.0068414 (PMC3709991; doi:10.1371/journal.pone.0068414)
Supplement: Table S5 — The enrichment analysis results for the differentially expressed genes of GSE39330 HMDM samples. The genes differentially expressed (adjusted p-value ≤0.05 and absolute fold change ≥1.5) at both timepoints were input to the enrichment analysis, and the enrichments were computed through the KEGG pathways, GO Biological Processes, GO Molecular Functions, GO Cellular Components. The result gives the p-value showing whether the term is significantly enriched, expected count of the genes within the term, the odds-ratio of the genes of the list within the term, the total number of the genes and the genes found in the list within the term. (XLS) [file pone.0068414.s008.xls]

## Sheet: Sheet1
Category	Term	Pvalue	OddsRatio	ExpCount	Count	Size	Term	Gene Names
KEGGID	hsa05323	0.000136949	3.43572	5.09947	15	91	Rheumatoid arthritis	CD80, CXCL1, ICAM1, IL1A, IL1B, IL8, IL18, MMP1, CCL3, CCL20, CXCL6, CXCL5, TLR2, VEGFA, VEGFB
KEGGID	hsa04115	0.000332521	3.70843	3.81059	12	68	p53 signaling pathway	ATM, ATR, CCNE1, CCNG1, CDK4, CDKN1A, IGF1, CD82, SERPINE1, PMAIP1, SESN1, SESN2
KEGGID	hsa05144	0.000433634	4.20598	2.85795	10	51	Malaria	CD36, CD40, ICAM1, IL1B, IL8, IL10, IL18, SDC2, SDC4, TLR2
KEGGID	hsa04060	0.000787265	2.08223	14.8501	28	265	Cytokine-cytokine receptor interaction	BMP2, CD40, FLT3, CXCL1, CXCL3, IL1A, IL1B, IL2RA, IL3RA, IL8, IL10, IL18, LTBR, OSM, PPBP, CCL1, CCL3, CCL15, CCL20, CCL23, CXCL6, CXCL5, TGFBR1, VEGFA, VEGFB, CXCL14, IL19, TNFRSF12A
KEGGID	hsa00760	0.00168352	5.70072	1.34492	6	24	Nicotinate and nicotinamide metabolism	AOX1, CD38, PNP, NT5E, NAMPT, NNT
KEGGID	hsa00380	0.00803951	3.4205	2.3536	7	42	Tryptophan metabolism	ALDH3A2, AOX1, CAT, ECHS1, IDO1, MAOB, KYNU
KEGGID	hsa05219	0.00803951	3.4205	2.3536	7	42	Bladder cancer	CDK4, CDKN1A, IL8, MMP1, RB1, VEGFA, VEGFB
KEGGID	hsa00280	0.010378	3.23443	2.46568	7	44	Valine, leucine and isoleucine degradation	ACADM, ALDH3A2, AOX1, BCAT1, ECHS1, ALDH6A1, HIBADH
KEGGID	hsa04380	0.011922	2.11618	7.17288	14	128	Osteoclast differentiation	FOSL2, IL1A, IL1B, JUNB, NCF4, PIK3CG, PPP3CC, STAT2, SYK, TGFBR1, LILRB5, LILRA3, BLNK, TREM2
KEGGID	hsa04621	0.0147203	2.73745	3.25021	8	58	NOD-like receptor signaling pathway	CASP5, CXCL1, HSP90AB1, IL1B, IL8, IL18, TNFAIP3, PYCARD
KEGGID	hsa04062	0.0184436	1.81791	10.5912	18	189	Chemokine signaling pathway	ADCY7, DOCK2, CXCL1, CXCL3, IL8, PIK3CG, PPBP, PRKX, CCL1, CCL3, CCL15, CCL20, CCL23, CXCL6, CXCL5, STAT2, CXCL14, GNB4
KEGGID	hsa04110	0.0208643	2.01286	6.94873	13	124	Cell cycle	ATM, ATR, CCNE1, CDK4, CDKN1A, CDKN1C, MCM6, RB1, CDC16, CCNA1, MAD2L2, ANAPC5, ANAPC7
KEGGID	hsa04914	0.0212229	2.25458	4.81928	10	86	Progesterone-mediated oocyte maturation	ADCY7, HSP90AB1, IGF1, PIK3CG, PRKX, CDC16, CCNA1, MAD2L2, ANAPC5, ANAPC7
KEGGID	hsa04114	0.0222067	2.06006	6.27627	12	112	Oocyte meiosis	ADCY7, CALM2, CCNE1, IGF1, PPP2R5B, PPP2R5D, PPP3CC, PRKX, CDC16, MAD2L2, ANAPC5, ANAPC7
KEGGID	hsa05200	0.0252714	1.56771	18.2684	27	326	Pathways in cancer	BMP2, CCNE1, CDK4, CDKN1A, CEBPA, FLT3, FZD2, HSP90AB1, IGF1, IL8, ITGAV, LAMC1, MMP1, MSH2, PIK3CG, PTGS2, RAD51, RB1, SLC2A1, STAT5A, TGFBR1, TRAF5, VEGFA, VEGFB, WNT5A, WNT6, CCNA1
KEGGID	hsa04620	0.0267387	2.07205	5.71589	11	102	Toll-like receptor signaling pathway	CD80, CD40, MAP3K8, IL1B, IL8, IRAK1, PIK3CG, CCL3, TLR2, TLR5, TLR7
KEGGID	hsa00640	0.030999	3.15215	1.79322	5	32	Propanoate metabolism	ACADM, ALDH3A2, ECHS1, LDHA, ALDH6A1
KEGGID	hsa00071	0.031236	2.76378	2.40964	6	43	Fatty acid metabolism	ACADM, ADH5, ALDH3A2, ECHS1, ACSL1, ACSL4
KEGGID	hsa00410	0.0317807	3.77709	1.23284	4	22	beta-Alanine metabolism	ACADM, ALDH3A2, ECHS1, SRM
KEGGID	hsa05143	0.0436383	2.83539	1.96134	5	35	African trypanosomiasis	ICAM1, IL1B, IL10, IL18, IDO1
KEGGID	hsa00520	0.0498982	2.43255	2.68983	6	48	Amino sugar and nucleotide sugar metabolism	GALK2, GALT, RENBP, GNPDA1, NAGK, UAP1L1
GOBPID	GO:0042221	1e-09	1.70516	137.535	203	2629	response to chemical stimulus	ABL2,ADCY7,ADH5,ADM,PARP1,AP2A2,AHCY,AQP9,ATP5D,BACH1,BLMH,BMP2,CAT,SERPINH1,CCNE1,CCNG1,CD36,CD38,CD44,CD68,CDK4,CDKN1A,CEBPA,CISH,CLU,CMKLR1,PLK3,CYP27B1,AKR1C1,NQO1,DOCK2,RCAN1,DUSP1,DUSP4,DUSP6,S1PR1,EDN1,EFNB2,EPHB2,EREG,ACSL4,FLT3,FPR2,FXN,FZD2,NR3C1,CXCL1,CXCL3,GSTM3,HHEX,HSPA6,HSP90AB1,HTR2B,ICAM1,IRF8,IDE,IL1A,IL1B,IL2RA,IL3RA,IL8,IL10,IL16,IL18,IRAK1,IRAK2,ITGAV,JUNB,LAMC1,LSP1,LTA4H,MA…
GOBPID	GO:0002376	1.30157e-09	1.84664	87.8364	143	1679	immune system process	AP2A2,AP1B1,AQP9,ATM,ATP1B1,BCL6,BLMH,C1QBP,CD80,CD36,CD38,CD40,CD44,CD48,CDKN1A,CEBPA,CLU,CMKLR1,MAP3K8,CYP27B1,DNASE2,DOCK2,DUSP4,DUSP6,EDN1,EREG,FCAR,FLT3,FYB,GALNT2,LRRC32,GEM,CXCL1,CXCL3,HHEX,HLX,HES1,HSP90AB1,ICAM1,IRF8,IFI16,IGF1,IL1A,IL1B,IL2RA,IL8,IL10,IL16,IL18,IMPDH2,IRAK1,IRAK2,ITGAV,JUNB,CD180,LYL1,MAP3K5,MMP1,MNDA,MPP1,CITED1,MSH2,MT1G,MT2A,NCF4,NFIL3,PNP,OSM,SERPINE1,SERPINB9,PIK3C…
GOBPID	GO:0050896	7.64517e-09	1.53148	334.971	411	6403	response to stimulus	ABL2,ADCY7,ADH5,ADM,ADORA3,PARP1,AP2A2,AP1B1,AHCY,AOX1,APEX1,AQP9,ARF4,RND3,ARHGAP5,ASCL2,ATM,ATP1B1,ATP5D,ATR,BACH1,BCL6,BLMH,BMP2,C1QBP,CASP5,CAT,SERPINH1,CCNE1,CCNG1,CD80,CD36,CD38,CD40,CD44,CD48,CD68,CDK4,CDKN1A,CDKN1C,CEBPA,CISH,CLU,CMKLR1,PLK3,VCAN,CYP27B1,AKR1C1,DDX1,NQO1,DOCK2,RCAN1,HBEGF,DUSP1,DUSP4,DUSP5,DUSP6,S1PR1,EDN1,EFNB2,EPHB2,CLN8,EREG,EZH2,F5,ACSL4,FCAR,FKBP4,FLT3,FNTA,FPR2,FXN,…
GOBPID	GO:0006955	1.36071e-08	1.99188	53.7795	96	1028	immune response	AQP9,BCL6,C1QBP,CD80,CD36,CD38,CD40,CD44,CLU,CMKLR1,CYP27B1,DUSP4,DUSP6,EREG,FCAR,FYB,GEM,CXCL1,CXCL3,HLX,HSP90AB1,ICAM1,IRF8,IL1A,IL1B,IL2RA,IL8,IL10,IL16,IL18,IRAK1,IRAK2,CD180,MAP3K5,MNDA,CITED1,MSH2,MT2A,NCF4,NFIL3,PNP,OSM,SERPINB9,PIK3CG,PPBP,LGMN,PTPN1,PTPN2,PVRL2,S100A12,CCL1,CCL3,CCL15,CCL20,CCL23,CXCL6,CXCL5,SLC11A1,SNCA,STAT2,STAT5A,SYK,TLR2,TLR5,TNFAIP3,UBA7,VEGFA,WNT5A,ZP3,VNN1,KYNU,C…
GOBPID	GO:0051716	4.50641e-08	1.5102	253.779	323	4851	cellular response to stimulus	ABL2,ADCY7,ADM,ADORA3,PARP1,AP2A2,AHCY,APEX1,AQP9,ARF4,RND3,ARHGAP5,ATM,ATR,BACH1,BCL6,BMP2,CASP5,CAT,CCNE1,CCNG1,CD80,CD36,CD38,CD40,CD44,CD48,CD68,CDK4,CDKN1A,CDKN1C,CEBPA,CISH,CLU,CMKLR1,PLK3,VCAN,CYP27B1,AKR1C1,DDX1,NQO1,RCAN1,HBEGF,DUSP1,DUSP4,DUSP5,DUSP6,S1PR1,EDN1,EFNB2,EPHB2,EREG,EZH2,FKBP4,FLT3,FNTA,FPR2,FXN,FYB,FZD2,GEM,GNA15,NR3C1,CXCL1,CXCL3,HHEX,HES1,HSP90AB1,HTR2B,ICAM1,IRF8,IDE,IFI…
GOBPID	GO:0070887	8.86475e-08	1.76654	78.1059	124	1493	cellular response to chemical stimulus	ABL2,ADCY7,PARP1,AHCY,AQP9,BACH1,BMP2,CAT,CCNE1,CD36,CD44,CD68,CEBPA,CISH,CLU,CMKLR1,PLK3,CYP27B1,AKR1C1,NQO1,DUSP1,DUSP6,EDN1,EREG,FLT3,FXN,FZD2,NR3C1,CXCL3,HHEX,HSP90AB1,HTR2B,ICAM1,IRF8,IDE,IL1A,IL1B,IL2RA,IL3RA,IL8,IL10,IL16,IL18,IRAK1,IRAK2,JUNB,MAOB,MAP3K5,MGST1,MPP1,MT1A,MT1E,MT1G,MT1M,MT2A,MT3,NFATC3,SERPINE1,PHB,SERPINB9,PIK3CG,PLP2,PMAIP1,PPAT,PPP2R5B,PTGS2,PTPN1,PTPN2,S100A12,CCL3,CCL2…
GOBPID	GO:0006950	2.02875e-07	1.56293	147.684	204	2823	response to stress	ADH5,ADM,ADORA3,PARP1,AP2A2,AP1B1,AOX1,APEX1,AQP9,ARF4,ASCL2,ATM,ATP1B1,ATR,BACH1,BCL6,BMP2,C1QBP,CAT,SERPINH1,CCNG1,CD36,CD38,CD40,CD44,CD48,CDKN1A,CEBPA,CLU,PLK3,VCAN,CYP27B1,DDX1,NQO1,DOCK2,HBEGF,DUSP1,DUSP4,DUSP6,EDN1,CLN8,EREG,F5,FPR2,FXN,GNA15,CXCL1,CXCL3,HHEX,HSPA6,HSP90AB1,ICAM1,IRF8,IFI16,IGF1,IL1A,IL1B,IL2RA,IL8,IL10,IL18,INSIG1,IRAK1,IRAK2,ITGAV,LSP1,LTA4H,LTBR,CD180,MAP3K5,MGST1,MMP1,…
GOBPID	GO:0009605	4.50446e-07	1.77558	65.8119	106	1258	response to external stimulus	ABL2,ADM,AP2A2,BCL6,BMP2,CASP5,CAT,CCNE1,CD36,CD38,CD40,CDKN1A,CEBPA,CMKLR1,CYP27B1,DOCK2,RCAN1,DUSP1,S1PR1,EDN1,EFNB2,EPHB2,ACSL4,FPR2,FZD2,CXCL1,CXCL3,HSP90AB1,ICAM1,IL1A,IL1B,IL2RA,IL8,IL10,IL16,IL18,ITGAV,JUNB,LAMC1,LDHA,LSP1,LTBR,MPP1,MT3,MYH11,NT5E,OSM,SERPINE1,SERPINF1,PIK3CG,PLAUR,PLP2,PMAIP1,PPBP,PTGS2,PTPRM,CCL1,CCL3,CCL15,CCL20,CCL23,CXCL6,CXCL5,SLC2A1,SOD2,SRC,STAT5A,SUPT5H,SYK,TLR2,T…
GOBPID	GO:0008283	1.15387e-06	1.69495	75.2809	116	1439	cell proliferation	ADM,BIN1,ASCL2,ATM,BCAT1,BCL6,BMP2,ZFP36L2,CD80,CD38,CD40,CDK4,CDKN1A,CDKN1C,CEBPA,CLU,CYP27B1,DBP,DKC1,DOCK2,HBEGF,S1PR1,EDN1,EREG,FLT3,FOSL2,FXN,LRRC32,KAT2A,CXCL1,HHEX,HLX,HES1,HTR2B,IFI16,IGF1,IL1A,IL1B,IL2RA,IL8,IL10,IL18,IMPDH2,INSIG1,ITGAV,JUNB,LAMC1,MXD1,MMP12,MNDA,CITED1,MT3,MXI1,NAB2,NDP,PNP,ODC1,OSM,SERPINE1,SERPINF1,PHB,PIK3CG,PMAIP1,PMP22,PRKX,PTGS2,PTPRM,RARRES3,RB1,CCL23,CXCL5,SGK1…
GOBPID	GO:0032496	1.32432e-06	3.01203	10.8815	29	208	response to lipopolysaccharide	ADH5,ADM,CD36,CYP27B1,EDN1,ICAM1,IRF8,IL1A,IL1B,IL8,IL10,IL18,IRAK1,IRAK2,MAOB,MGST1,CITED1,SERPINE1,SERPINA1,PTGS2,CCL3,SLC11A1,SNCA,SOD2,TLR2,TNFAIP3,WNT5A,ABCC5,TNIP3
GOBPID	GO:0006952	1.67856e-06	1.7912	55.6105	91	1063	defense response	ADORA3,AP2A2,AP1B1,AOX1,BCL6,BMP2,CD36,CD40,CD44,CD48,CEBPA,CLU,CYP27B1,DOCK2,DUSP4,DUSP6,EREG,FPR2,CXCL1,CXCL3,HSP90AB1,ICAM1,IRF8,IL1A,IL1B,IL2RA,IL8,IL10,IL18,IRAK1,IRAK2,LSP1,LTA4H,CD180,MAP3K5,MNDA,CITED1,MT2A,NFATC3,NT5E,OSM,SERPINE1,SERPINF1,SERPINA1,PIK3CG,PPBP,LGMN,PTGS2,PTPN1,PTPN2,PVRL2,S100A12,CCL3,CCL20,CCL23,CXCL6,SLC11A1,SNCA,STAT2,STAT5A,SYK,TLR2,TLR5,TNFAIP3,TNFAIP6,TPSAB1,UBA7,W…
GOBPID	GO:0006954	1.891e-06	2.2289	24.1694	49	462	inflammatory response	ADORA3,AOX1,BCL6,BMP2,CD40,CEBPA,FPR2,CXCL1,CXCL3,IL1A,IL1B,IL2RA,IL8,IL10,IL18,IRAK2,LTA4H,CD180,NFATC3,NT5E,OSM,SERPINE1,SERPINF1,SERPINA1,PIK3CG,PTGS2,S100A12,CCL3,CCL20,CCL23,CXCL6,SLC11A1,STAT5A,SYK,TLR2,TLR5,TNFAIP3,TNFAIP6,WNT5A,ZP3,VNN1,CHST2,TNIP1,PDPN,BLNK,EMR2,TLR7,NFKBIZ,TNIP3
GOBPID	GO:0080134	2.19351e-06	1.9804	35.8879	65	686	regulation of response to stress	AP2A2,AP1B1,APEX1,ATM,ATR,BCL6,CD36,CD44,DOCK2,HBEGF,DUSP4,DUSP6,EDN1,EREG,HSP90AB1,IL1A,IL1B,IL2RA,IL10,IL18,IRAK1,IRAK2,LTBR,MAP3K5,NT5E,OSM,SERPINE1,SERPINF1,PIK3CG,PLAUR,PMAIP1,PTGS2,PTPN1,PTPN2,PVRL2,CCL3,SNAI1,STAT2,STAT5A,SUPT5H,SYK,TLR2,TLR5,TNFAIP3,TWIST1,VEGFA,VEGFB,WNT5A,ZP3,PPAP2B,TRIM28,TNIP1,FBLN5,POLR3G,PDPN,KANK1,HIPK2,TLR7,ERAP1,TERF2IP,GIMAP5,POLR3B,CRTAM,TNIP3,SPRED2
GOBPID	GO:0048518	2.22149e-06	1.47458	173.371	227	3314	positive regulation of biological process	ABL2,ADCY7,ADM,ADORA3,BIN1,APEX1,ATM,ATR,BCL6,BMP2,CAT,CCNE1,CD80,CD36,CD38,CD40,CD44,CDK4,CDKN1A,CDKN1C,CEBPA,CLU,CMKLR1,PLK3,MAP3K8,CYP27B1,DBP,NQO1,HBEGF,DUSP1,DUSP4,DUSP6,S1PR1,EDN1,EPHB2,EREG,ETS2,ACSL4,BPTF,FLT3,FNTA,FOSL2,FXN,FYB,FZD2,LRRC32,GTF2F2,HHEX,HLX,HES1,HSP90AB1,HTR2B,ICAM1,IRF8,IDE,IFI16,IGF1,IL1A,IL1B,IL2RA,IL8,IL10,IL16,IL18,INSIG1,IRAK1,IRAK2,ITGAV,JUNB,LAMC1,LTBR,LYL1,MAOB,MA…
GOBPID	GO:0070661	2.93424e-06	3.0911	9.52128	26	182	leukocyte proliferation	ATM,BCL6,CD80,CD38,CD40,CDKN1A,DOCK2,FLT3,LRRC32,HES1,IGF1,IL1B,IL2RA,IL10,IL18,IMPDH2,MNDA,PNP,PIK3CG,SLC11A1,STAT5A,SYK,TNFAIP3,ZP3,EBI3,GREM1
GOBPID	GO:0048522	3.24594e-06	1.48073	157.886	209	3018	positive regulation of cellular process	ABL2,ADCY7,ADM,ADORA3,BIN1,APEX1,ATM,ATR,BCL6,BMP2,CAT,CCNE1,CD80,CD36,CD38,CD40,CD44,CDK4,CDKN1A,CDKN1C,CEBPA,CLU,CMKLR1,PLK3,MAP3K8,CYP27B1,DBP,NQO1,HBEGF,DUSP1,DUSP6,S1PR1,EDN1,EPHB2,EREG,ETS2,ACSL4,BPTF,FLT3,FNTA,FOSL2,FXN,FZD2,GTF2F2,HHEX,HLX,HES1,HSP90AB1,HTR2B,ICAM1,IRF8,IFI16,IGF1,IL1A,IL1B,IL2RA,IL8,IL10,IL18,INSIG1,IRAK1,IRAK2,ITGAV,JUNB,LAMC1,LTBR,LYL1,MAOB,MAP3K5,MFNG,MMP12,MNDA,CITED…
GOBPID	GO:0010033	3.34778e-06	1.60959	88.6734	130	1695	response to organic substance	ADCY7,ADH5,ADM,PARP1,AQP9,BMP2,CAT,SERPINH1,CCNE1,CCNG1,CD36,CD38,CD44,CD68,CDKN1A,CEBPA,CISH,CLU,CMKLR1,CYP27B1,AKR1C1,RCAN1,DUSP1,DUSP4,DUSP6,EDN1,EREG,ACSL4,FLT3,FXN,FZD2,NR3C1,GSTM3,HHEX,HSPA6,HSP90AB1,ICAM1,IRF8,IDE,IL1A,IL1B,IL2RA,IL3RA,IL8,IL10,IL18,IRAK1,IRAK2,JUNB,LTA4H,MAOB,MCL1,MGST1,MMP19,CITED1,MSH2,MT1G,MT2A,MT3,PEBP1,SERPINE1,SERPINF1,PHB,SERPINA1,SERPINB9,PLP2,PMAIP1,POLB,PPAT,PPP…
GOBPID	GO:0002237	4.16455e-06	2.82028	11.5092	29	220	response to molecule of bacterial origin	ADH5,ADM,CD36,CYP27B1,EDN1,ICAM1,IRF8,IL1A,IL1B,IL8,IL10,IL18,IRAK1,IRAK2,MAOB,MGST1,CITED1,SERPINE1,SERPINA1,PTGS2,CCL3,SLC11A1,SNCA,SOD2,TLR2,TNFAIP3,WNT5A,ABCC5,TNIP3
GOBPID	GO:0030595	4.4365e-06	3.81182	5.80693	19	111	leukocyte chemotaxis	CMKLR1,EDN1,CXCL3,IL1B,IL8,IL10,IL16,MPP1,SERPINE1,PIK3CG,CCL3,CCL23,SYK,VEGFA,VEGFB,WNT5A,GREM1,EMR2,SBDS
GOBPID	GO:0034097	5.12587e-06	2.10503	26.4712	51	506	response to cytokine stimulus	CCNE1,CD38,CD44,CEBPA,CMKLR1,CYP27B1,EDN1,EREG,ACSL4,FLT3,HSP90AB1,ICAM1,IRF8,IL1A,IL1B,IL2RA,IL3RA,IL8,IL18,IRAK1,IRAK2,JUNB,MCL1,CITED1,MT2A,MT3,SERPINE1,PHB,SERPINA1,PLP2,PTGS2,PTPN1,PTPN2,CCL3,SLC11A1,SNCA,SRC,STAT2,STAT5A,TIMP1,UBA7,WNT5A,LRP8,KYNU,NUPL1,EBI3,ST3GAL6,PYCARD,INPP5K,PID1,EIF4E3
GOBPID	GO:0032103	5.5846e-06	3.33459	7.53332	22	144	positive regulation of response to external stimulus	CMKLR1,CYP27B1,S1PR1,EDN1,IL1B,IL8,IL16,IL18,OSM,SERPINE1,PIK3CG,PTGS2,CCL3,STAT5A,SUPT5H,TLR2,VEGFA,VEGFB,WNT5A,ZP3,TNIP1,TLR7
GOBPID	GO:0009611	7.91751e-06	1.72365	56.1337	89	1073	response to wounding	ADM,ADORA3,AOX1,ARF4,ATP1B1,BCL6,BMP2,C1QBP,CD36,CD40,CD48,CEBPA,CLU,VCAN,HBEGF,EDN1,EREG,F5,FPR2,GNA15,CXCL1,CXCL3,HHEX,IGF1,IL1A,IL1B,IL2RA,IL8,IL10,IL18,IRAK2,ITGAV,LTA4H,CD180,MMP1,MMP12,NFATC3,NT5E,OSM,PEBP1,SERPINE1,SERPINF1,SERPINA1,PIK3CG,PLAUR,PPBP,PTGS2,PTPN1,RAD51C,S100A12,CCL3,CCL20,CCL23,CXCL6,SDC2,SLC8A3,SLC11A1,SOD2,SRC,STAT5A,SYK,TFPI,TGFBR1,TIMP1,TLR2,TLR5,TNFAIP3,TNFAIP6,VEGFA,V…
GOBPID	GO:0035556	8.24627e-06	1.57757	89.4059	129	1709	intracellular signal transduction	ADCY7,ADM,ARF4,RND3,ARHGAP5,ATM,ATR,BCL6,CAT,CD80,CD36,CD40,CD44,CDKN1A,CISH,CLU,CMKLR1,PLK3,RCAN1,HBEGF,DUSP1,DUSP4,DUSP6,EDN1,FLT3,FYB,GEM,CXCL1,HES1,HTR2B,IFI16,IGF1,IL1A,IL1B,IL8,IL10,IL18,IRAK1,IRAK2,ITGAV,LTBR,MAP3K5,MSH2,MT1A,MT3,OSM,PEBP1,PIK3C2B,PIK3CG,PMAIP1,PTPN1,RAB13,RAP2B,RB1,S100A12,CCL3,SNAI1,SRC,SS18,STAT2,STAT5A,SYK,TGFBR1,TIMP2,TLR2,TNFAIP3,TRAF5,TWIST1,VEGFA,VEGFB,WNT5A,ZP3,AN…
GOBPID	GO:0043066	9.28092e-06	1.98328	30.7087	56	587	negative regulation of apoptotic process	ADM,APEX1,ATM,BCL6,CASP5,CAT,CCNG1,CD38,CD44,CDKN1A,CLU,PLK3,DUSP1,EDN1,CLN8,FXN,HTR2B,IGF1,IL1A,IL1B,IL10,IRAK1,ITGAV,MCL1,CITED1,MSH2,MT3,SERPINE1,SERPINB9,PIK3CG,PLAUR,POLB,LGMN,SNAI1,SNCA,SOD2,STAT5A,TGFBR1,TIMP1,TNFAIP3,VEGFA,VEGFB,WNT5A,BTG2,NR4A3,CSDA,SOCS2,TSC22D1,VNN1,NOL3,BAG3,SPRY2,TNFAIP8,SERBP1,HIPK2,GIMAP5
GOBPID	GO:0046651	1.05409e-05	3.00111	8.99813	24	172	lymphocyte proliferation	ATM,BCL6,CD80,CD38,CD40,CDKN1A,DOCK2,FLT3,LRRC32,HES1,IGF1,IL1B,IL2RA,IL10,IL18,IMPDH2,MNDA,PNP,PIK3CG,SLC11A1,STAT5A,SYK,ZP3,EBI3
GOBPID	GO:0006468	1.08041e-05	1.70268	57.3892	90	1097	protein phosphorylation	ABL2,ADCY7,ATM,ATR,BMP2,CCNE1,CCNG1,CD80,CD36,CD40,CD44,CDK4,CDKN1A,CDKN1C,PLK3,MAP3K8,DUSP1,DUSP4,DUSP5,DUSP6,EDN1,EPHB2,EREG,FLT3,FYB,HES1,HTR2B,IGF1,IL1B,IL8,IRAK1,IRAK2,MAP3K5,MT3,OSM,PEBP1,PDK3,PIK3CG,PPP2R5B,PRKX,RAP2B,RB1,CCL3,SDC4,SGK1,SLC11A1,SNCA,SRC,SSR1,STAT5A,SYK,TGFBR1,TLR2,TNFAIP3,TWIST1,VEGFA,VEGFB,WNT5A,ZP3,LRP8,DYRK2,PPAP2B,CCNA1,HERPUD1,TRIM28,SPRY2,MAD2L2,MERTK,NPRL2,CAMKK2,SI…
GOBPID	GO:0010035	1.22326e-05	2.27347	18.781	39	359	response to inorganic substance	AQP9,ATP5D,CAT,CD36,CDKN1A,CEBPA,PLK3,DUSP1,FXN,HTR2B,ICAM1,IL1A,IL10,IL18,JUNB,LTA4H,MAOB,MAP3K5,MT1A,MT1E,MT1G,MT1M,MT2A,MT3,MTF1,NFATC3,PEBP1,SERPINE1,SERPINA1,PTGS2,SNCA,SOD2,SYT1,WNT5A,SLC30A1,FBLN5,CLIC4,HVCN1,PPARGC1B
GOBPID	GO:0065007	1.23214e-05	1.39205	444.466	500	8496	biological regulation	ABCB7,ABL2,ADCY7,ADH5,ADM,ADORA3,PARP1,AP2A2,AP1B1,BIN1,APEX1,AQP9,ARF4,RND3,ARHGAP5,ASCL2,ATM,ATP1B1,ATR,BACH1,BCL6,BMP2,ZFP36L2,C1QBP,CASP5,CAT,SERPINH1,CCNE1,CCNG1,CD80,CD36,CD38,CD40,CD44,CD48,CDK4,CDKN1A,CDKN1C,CEBPA,RCC1,CISH,CLU,CMKLR1,PLK3,MAP3K8,CSTA,CYP27B1,DBP,AKR1C1,DDX1,NQO1,DKC1,DNASE2,DOCK2,ARID3A,RCAN1,HBEGF,DUSP1,DUSP4,DUSP5,DUSP6,S1PR1,EDN1,EFNB2,EPHB2,CLN8,EREG,ETS2,EZH2,F5,ACS…
GOBPID	GO:0043069	1.24998e-05	1.96022	31.0226	56	593	negative regulation of programmed cell death	ADM,APEX1,ATM,BCL6,CASP5,CAT,CCNG1,CD38,CD44,CDKN1A,CLU,PLK3,DUSP1,EDN1,CLN8,FXN,HTR2B,IGF1,IL1A,IL1B,IL10,IRAK1,ITGAV,MCL1,CITED1,MSH2,MT3,SERPINE1,SERPINB9,PIK3CG,PLAUR,POLB,LGMN,SNAI1,SNCA,SOD2,STAT5A,TGFBR1,TIMP1,TNFAIP3,VEGFA,VEGFB,WNT5A,BTG2,NR4A3,CSDA,SOCS2,TSC22D1,VNN1,NOL3,BAG3,SPRY2,TNFAIP8,SERBP1,HIPK2,GIMAP5
GOBPID	GO:0032943	1.28569e-05	2.96066	9.10276	24	174	mononuclear cell proliferation	ATM,BCL6,CD80,CD38,CD40,CDKN1A,DOCK2,FLT3,LRRC32,HES1,IGF1,IL1B,IL2RA,IL10,IL18,IMPDH2,MNDA,PNP,PIK3CG,SLC11A1,STAT5A,SYK,ZP3,EBI3
GOBPID	GO:0070482	1.28941e-05	2.63802	12.1893	29	233	response to oxygen levels	ADM,ASCL2,ATM,ATP1B1,BACH1,BMP2,CAT,CD38,CDKN1A,PLK3,EDN1,ICAM1,IL1A,IL1B,IL18,MT3,SERPINE1,SERPINA1,PMAIP1,PTGS2,SDC2,SOD2,TGFBR1,TWIST1,VEGFA,WNT5A,PDPN,HIPK2,DDIT4
GOBPID	GO:0060548	1.4254e-05	1.93791	31.912	57	610	negative regulation of cell death	ADM,APEX1,ATM,BCL6,CASP5,CAT,CCNG1,CD38,CD44,CDKN1A,CLU,PLK3,DUSP1,EDN1,CLN8,FXN,HTR2B,IGF1,IL1A,IL1B,IL10,IRAK1,ITGAV,MCL1,CITED1,MSH2,MT3,SERPINE1,SERPINB9,PIK3CG,PLAUR,POLB,LGMN,SNAI1,SNCA,SOD2,STAT5A,TGFBR1,TIMP1,TNFAIP3,VEGFA,VEGFB,WNT5A,BTG2,NR4A3,CSDA,SOCS2,TSC22D1,VNN1,NOL3,BAG3,SPRY2,CABIN1,TNFAIP8,SERBP1,HIPK2,GIMAP5
GOBPID	GO:0040007	1.61107e-05	1.84606	38.1374	65	729	growth	ADM,PARP1,BCL6,BMP2,CCNE1,CCNG1,CD36,CD38,CDKN1A,CISH,CYP27B1,HBEGF,DUSP6,EDN1,EREG,ACSL4,FXN,KAT2A,HHEX,HLX,IRF8,IGF1,IL10,MT1A,MT1E,MT1G,MT1M,MT2A,MT3,MYO5A,OSM,SERPINE1,PHB,PLAUR,LGMN,PTGS2,RB1,SGK1,STAT5A,TBCE,TGFBR1,TLR2,VEGFA,WNT5A,ZP3,CSDA,RUVBL1,URI1,SOCS2,SPRY2,MAD2L2,C6orf108,AFG3L2,CYFIP1,ABTB2,NUPR1,GREM1,PRPF19,LRP12,SBDS,CRIM1,TNFRSF12A,NOL8,CCNB1IP1,ARID5B
GOBPID	GO:0007165	2.17695e-05	1.39275	208.631	259	3988	signal transduction	ABL2,ADCY7,ADM,ADORA3,AP2A2,ARF4,RND3,ARHGAP5,ATM,ATR,BCL6,BMP2,CAT,CCNE1,CD80,CD36,CD38,CD40,CD44,CD48,CDK4,CDKN1A,CDKN1C,CEBPA,CISH,CLU,CMKLR1,PLK3,CYP27B1,RCAN1,HBEGF,DUSP1,DUSP4,DUSP5,DUSP6,S1PR1,EDN1,EFNB2,EPHB2,EREG,EZH2,FKBP4,FLT3,FNTA,FPR2,FXN,FYB,FZD2,GEM,GNA15,NR3C1,CXCL1,HHEX,HES1,HSP90AB1,HTR2B,ICAM1,IRF8,IDE,IFI16,IGF1,IL1A,IL1B,IL2RA,IL3RA,IL8,IL10,IL18,INSIG1,IRAK1,IRAK2,ITGAV,ITGB…
GOBPID	GO:0050900	2.45478e-05	2.53696	12.6078	29	241	leukocyte migration	ATP1B1,CD48,CMKLR1,EDN1,CXCL3,ICAM1,IL1B,IL8,IL10,IL16,ITGAV,MMP1,MPP1,SERPINE1,PIK3CG,CCL3,CCL23,SRC,SYK,TLR2,VEGFA,VEGFB,WNT5A,ZP3,MERTK,GREM1,EMR2,SBDS,TREM1
GOBPID	GO:0051091	2.65571e-05	2.89189	8.8935	23	170	positive regulation of sequence-specific DNA binding transcription factor activity	CAT,CD40,CLU,FZD2,ICAM1,IL1B,IL10,IRAK1,IRAK2,NDP,PPP2R5B,TLR2,TRAF5,VEGFA,WNT5A,LRP8,PPAP2B,HMGN3,GREM1,HIPK2,PYCARD,TERF2IP,ARID5B
GOBPID	GO:0006796	2.89793e-05	1.57499	76.3795	111	1460	phosphate-containing compound metabolic process	ABL2,ADCY7,ATM,ATP5D,ATR,BMP2,CCNE1,CCNG1,CD80,CD36,CD40,CD44,CDK4,CDKN1A,CDKN1C,PLK3,MAP3K8,RCAN1,DUSP1,DUSP4,DUSP5,DUSP6,EDN1,EPHB2,EREG,FLT3,FXN,FYB,GK,HES1,HTR2B,IGF1,IL1B,IL8,IRAK1,IRAK2,LIMK2,MAP3K5,MSH2,MT3,NDUFV1,OSM,PEBP1,PDK3,PFKFB3,PFKP,PIK3CG,PPP2R5B,PRKX,PTPN1,PTPN2,PTPN4,PTPRM,RAP2B,RB1,CCL3,SDC4,SGK1,SLC11A1,SNCA,SRC,SSR1,STAT5A,SYK,TGFBR1,TLR2,TNFAIP3,TPI1,TWIST1,VEGFA,VEGFB,WNT5A…
GOBPID	GO:0001932	2.92918e-05	1.79735	39.6546	66	758	regulation of protein phosphorylation	ADCY7,BMP2,CCNE1,CCNG1,CD80,CD36,CD40,CD44,CDKN1A,CDKN1C,DUSP1,DUSP4,DUSP5,DUSP6,EDN1,EREG,FLT3,HES1,HTR2B,IGF1,IL1B,IL8,IRAK1,IRAK2,MAP3K5,MT3,OSM,PEBP1,PIK3CG,PPP2R5B,RAP2B,RB1,SDC4,SLC11A1,SNCA,SSR1,SYK,TGFBR1,TNFAIP3,TWIST1,VEGFA,VEGFB,WNT5A,ZP3,LRP8,PPAP2B,CCNA1,HERPUD1,SPRY2,MAD2L2,CAMKK2,GREM1,NPTN,SERTAD1,INPP5K,PID1,IMPACT,RAP2C,SRPRB,SAMSN1,FAM58A,FAM129A,CCNYL1,CNKSR3,SPRED2,CCDC88C
GOBPID	GO:0006793	2.98431e-05	1.5737	76.4318	111	1461	phosphorus metabolic process	ABL2,ADCY7,ATM,ATP5D,ATR,BMP2,CCNE1,CCNG1,CD80,CD36,CD40,CD44,CDK4,CDKN1A,CDKN1C,PLK3,MAP3K8,RCAN1,DUSP1,DUSP4,DUSP5,DUSP6,EDN1,EPHB2,EREG,FLT3,FXN,FYB,GK,HES1,HTR2B,IGF1,IL1B,IL8,IRAK1,IRAK2,LIMK2,MAP3K5,MSH2,MT3,NDUFV1,OSM,PEBP1,PDK3,PFKFB3,PFKP,PIK3CG,PPP2R5B,PRKX,PTPN1,PTPN2,PTPN4,PTPRM,RAP2B,RB1,CCL3,SDC4,SGK1,SLC11A1,SNCA,SRC,SSR1,STAT5A,SYK,TGFBR1,TLR2,TNFAIP3,TPI1,TWIST1,VEGFA,VEGFB,WNT5A…
GOBPID	GO:0002684	3.21022e-05	1.9495	28.3023	51	541	positive regulation of immune system process	BCL6,CD80,CD36,CD38,CD40,CDKN1A,CLU,CMKLR1,MAP3K8,DUSP4,DUSP6,EDN1,EREG,FYB,HLX,HES1,ICAM1,IGF1,IL1B,IL2RA,IL8,IL18,IRAK1,IRAK2,MNDA,PNP,SERPINE1,PVRL2,CCL3,SLC11A1,SRC,STAT5A,SYK,TLR2,TLR5,TNFAIP3,VEGFA,VEGFB,WNT5A,ZP3,VNN1,EBI3,TNIP1,POLR3G,TLR7,GIMAP5,POLR3B,ENAH,PAG1,CRTAM,TNIP3
GOBPID	GO:0001775	3.2658e-05	1.81568	37.4573	63	716	cell activation	ATM,BCL6,CD80,CD36,CD38,CD40,CD48,CDKN1A,CLU,MAP3K8,DOCK2,EDN1,F5,FLT3,FZD2,LRRC32,GNA15,HHEX,HLX,HES1,ICAM1,IGF1,IL1B,IL2RA,IL8,IL10,IL18,IMPDH2,LYL1,MNDA,MSH2,MT1G,PNP,SERPINE1,SERPINA1,PIK3CG,PPBP,PTPN1,PVRL2,CCL3,SLAMF1,SLC11A1,SNCA,SRC,STAT5A,SYK,TIMP1,TNFAIP3,VEGFA,VEGFB,WNT5A,ZP3,VNN1,EBI3,MERTK,PDPN,SWAP70,BLNK,TLR7,APBB1IP,GIMAP5,PAG1,SAMSN1
GOBPID	GO:0010038	3.34114e-05	2.48924	12.8171	29	245	response to metal ion	AQP9,ATP5D,CEBPA,DUSP1,FXN,HTR2B,ICAM1,IL1A,JUNB,LTA4H,MAOB,MT1A,MT1E,MT1G,MT1M,MT2A,MT3,MTF1,NFATC3,PEBP1,SERPINA1,PTGS2,SNCA,SOD2,SYT1,WNT5A,SLC30A1,CLIC4,HVCN1
GOBPID	GO:0070663	3.52172e-05	3.00465	7.84721	21	150	regulation of leukocyte proliferation	ATM,BCL6,CD80,CD38,CD40,CDKN1A,LRRC32,HES1,IGF1,IL1B,IL2RA,IL10,IL18,MNDA,PNP,STAT5A,SYK,TNFAIP3,ZP3,EBI3,GREM1
GOBPID	GO:0071222	3.53231e-05	3.88436	4.49907	15	86	cellular response to lipopolysaccharide	CD36,ICAM1,IRF8,IL1B,IL8,IL10,IL18,IRAK1,IRAK2,SERPINE1,CCL3,TLR2,TNFAIP3,WNT5A,TNIP3
GOBPID	GO:0048584	3.96807e-05	1.66379	54.4596	84	1041	positive regulation of response to stimulus	APEX1,ATM,ATR,BMP2,CAT,CD80,CD36,CD38,CD40,CD44,CDKN1C,CLU,CMKLR1,CYP27B1,HBEGF,DUSP4,DUSP6,S1PR1,EDN1,EREG,FLT3,FYB,HHEX,HES1,HTR2B,IGF1,IL1A,IL1B,IL8,IL16,IL18,IRAK1,IRAK2,LTBR,MFNG,MNDA,CITED1,MT3,OSM,PEBP1,SERPINE1,PIK3CG,PMAIP1,PPP2R5B,PTGS2,PVRL2,S100A12,CCL3,SLC11A1,STAT5A,SUPT5H,SYK,TGFBR1,TLR2,TLR5,TNFAIP3,TRAF5,VEGFA,VEGFB,WNT5A,ZP3,PPAP2B,TRIM28,SPRY2,TNIP1,POLR3G,TRAF3IP2,KANK1,NPTN,A…
GOBPID	GO:0040011	4.15897e-05	1.62492	61.1036	92	1168	locomotion	ABL2,AP2A2,ATP1B1,BMP2,CD48,CMKLR1,VCAN,DOCK2,HBEGF,S1PR1,EDN1,EFNB2,EPHB2,FPR2,CXCL1,CXCL3,HES1,HSP90AB1,HTR2B,ICAM1,IGF1,IL1B,IL8,IL10,IL16,ITGAV,LAMC1,LSP1,MMP1,MMP10,MMP12,MPP1,MYH11,MYO5A,SERPINE1,PIK3CG,PLAUR,PLP2,PPBP,PRKX,PTGS2,PTPRM,PVRL2,RAP2B,CCL1,CCL3,CCL15,CCL20,CCL23,CXCL6,CXCL5,SGK1,SNAI1,SNCA,SRC,SYK,TGFBR1,TIMP1,TLR2,TWIST1,VEGFA,VEGFB,WNT5A,ZP3,LRP8,NR4A3,PPAP2A,PPAP2B,DNAH11,CX…
GOBPID	GO:0042127	4.25882e-05	1.64559	57.023	87	1090	regulation of cell proliferation	ADM,ASCL2,ATM,BCL6,BMP2,CD80,CD38,CD40,CDK4,CDKN1A,CDKN1C,CEBPA,CLU,CYP27B1,DBP,HBEGF,S1PR1,EDN1,EREG,FLT3,FOSL2,FXN,LRRC32,CXCL1,HHEX,HLX,HES1,HTR2B,IGF1,IL1A,IL1B,IL2RA,IL8,IL10,IL18,ITGAV,LAMC1,MMP12,MNDA,MXI1,PNP,ODC1,OSM,SERPINE1,SERPINF1,PHB,PMAIP1,PMP22,PTGS2,PTPRM,RARRES3,RB1,CCL23,CXCL5,SGK1,SHMT2,SLAMF1,SOD2,SSR1,STAT5A,SYK,TGFBR1,TIMP1,TIMP2,TNFAIP3,TRAF5,VEGFA,VEGFB,WNT5A,ZP3,BTG2,PPA…
GOBPID	GO:0050729	4.30075e-05	4.33917	3.5574	13	68	positive regulation of inflammatory response	IL1B,IL18,OSM,SERPINE1,PIK3CG,PTGS2,CCL3,STAT5A,TLR2,WNT5A,ZP3,TNIP1,TLR7
GOBPID	GO:0050789	4.3551e-05	1.35309	419.616	472	8021	regulation of biological process	ABL2,ADCY7,ADM,ADORA3,PARP1,AP2A2,AP1B1,BIN1,APEX1,ARF4,RND3,ARHGAP5,ASCL2,ATM,ATR,BACH1,BCL6,BMP2,ZFP36L2,CASP5,CAT,SERPINH1,CCNE1,CCNG1,CD80,CD36,CD38,CD40,CD44,CD48,CDK4,CDKN1A,CDKN1C,CEBPA,RCC1,CISH,CLU,CMKLR1,PLK3,MAP3K8,CSTA,CYP27B1,DBP,DDX1,NQO1,DOCK2,ARID3A,RCAN1,HBEGF,DUSP1,DUSP4,DUSP5,DUSP6,S1PR1,EDN1,EFNB2,EPHB2,CLN8,EREG,ETS2,EZH2,ACSL1,ACSL4,BPTF,FKBP4,FLI1,FLT3,FNTA,FOSL2,FPR2,FXN,F…
GOBPID	GO:0001525	4.5392e-05	2.20247	17.787	36	340	angiogenesis	ADM,S1PR1,EDN1,EFNB2,EPHB2,EREG,HHEX,IL1A,IL1B,IL8,IL18,ITGAV,MMP19,NCL,NFATC3,SERPINE1,SERPINF1,PRKX,PTGS2,PTPRM,SYK,TNFAIP3,TWIST1,VEGFA,VEGFB,WNT5A,SLC12A6,PLXND1,HEY1,GPR124,GREM1,HIPK2,TNFRSF12A,ERAP1,ARHGAP22,NAA15
GOBPID	GO:0031349	5.41174e-05	2.55889	11.1953	26	214	positive regulation of defense response	DUSP4,DUSP6,EREG,IL1B,IL18,IRAK1,IRAK2,OSM,SERPINE1,PIK3CG,PTGS2,PVRL2,CCL3,STAT5A,TLR2,TLR5,TNFAIP3,WNT5A,ZP3,TNIP1,POLR3G,TLR7,GIMAP5,POLR3B,CRTAM,TNIP3
GOBPID	GO:0016310	5.42748e-05	1.5958	64.8703	96	1240	phosphorylation	ABL2,ADCY7,ATM,ATP5D,ATR,BMP2,CCNE1,CCNG1,CD80,CD36,CD40,CD44,CDK4,CDKN1A,CDKN1C,PLK3,MAP3K8,DUSP1,DUSP4,DUSP5,DUSP6,EDN1,EPHB2,EREG,FLT3,FXN,FYB,HES1,HTR2B,IGF1,IL1B,IL8,IRAK1,IRAK2,LIMK2,MAP3K5,MSH2,MT3,NDUFV1,OSM,PEBP1,PDK3,PIK3CG,PPP2R5B,PRKX,RAP2B,RB1,CCL3,SDC4,SGK1,SLC11A1,SNCA,SRC,SSR1,STAT5A,SYK,TGFBR1,TLR2,TNFAIP3,TWIST1,VEGFA,VEGFB,WNT5A,ZP3,LRP8,DYRK2,PPAP2B,CCNA1,HERPUD1,TRIM28,SPRY2,…
GOBPID	GO:0002682	5.85132e-05	1.7223	43.7351	70	836	regulation of immune system process	AP2A2,AP1B1,ATM,BCL6,CD80,CD36,CD38,CD40,CDKN1A,CLU,CMKLR1,MAP3K8,DOCK2,DUSP4,DUSP6,EDN1,EREG,FLT3,FYB,LRRC32,HLX,HES1,HSP90AB1,ICAM1,IGF1,IL1B,IL2RA,IL8,IL10,IL18,IRAK1,IRAK2,MNDA,MPP1,PNP,SERPINE1,PTPN1,PTPN2,PVRL2,CCL3,SLC11A1,SNCA,SRC,STAT2,STAT5A,SYK,TLR2,TLR5,TNFAIP3,VEGFA,VEGFB,WNT5A,ZP3,VNN1,EBI3,TNIP1,POLR3G,GREM1,TLR7,ERAP1,TESC,GIMAP5,POLR3B,ENAH,PAG1,CRTAM,SAMSN1,TNIP3,CD200R1,PPARGC1B
GOBPID	GO:0032101	5.98734e-05	2.14402	18.7287	37	358	regulation of response to external stimulus	BCL6,CD36,CMKLR1,CYP27B1,S1PR1,EDN1,EFNB2,IL1B,IL2RA,IL8,IL10,IL16,IL18,MPP1,MT3,NT5E,OSM,SERPINE1,SERPINF1,PIK3CG,PLAUR,PTGS2,CCL3,STAT5A,SUPT5H,SYK,TLR2,TNFAIP3,VEGFA,VEGFB,WNT5A,ZP3,TNIP1,PDPN,GPR124,GREM1,TLR7
GOBPID	GO:0006979	6.13074e-05	2.48646	11.9278	27	228	response to oxidative stress	CAT,CD36,CD38,CLU,PLK3,NQO1,DUSP1,CLN8,FXN,IL18,MAP3K5,MGST1,MT3,MTF1,PEBP1,SERPINE1,PON2,PTGS2,SEPP1,SNCA,SOD2,TRPM2,VNN1,SLC23A2,TRAP1,FBLN5,PPARGC1B
GOBPID	GO:0065009	6.22232e-05	1.49778	93.2771	129	1783	regulation of molecular function	ABL2,ADCY7,ADORA3,BIN1,ARHGAP5,ATR,BCL6,BMP2,CAT,SERPINH1,CCNE1,CCNG1,CD40,CD44,CDKN1A,CDKN1C,CLU,CMKLR1,CSTA,CYP27B1,NQO1,RCAN1,DUSP1,DUSP4,DUSP5,DUSP6,S1PR1,EDN1,CLN8,EREG,FLT3,FNTA,FXN,FZD2,GNA15,CXCL1,HES1,HTR2B,ICA1,ICAM1,IGF1,IL1B,IL8,IL10,IRAK1,IRAK2,ITGAV,MAP3K5,MFNG,MSH2,MT3,MYO5A,NDP,OXA1L,SERPINE1,SERPINF1,SERPINA1,SERPINB9,PIK3CG,PMAIP1,PPP2R5B,RAP2B,RB1,RENBP,RGS16,CCL23,SDC4,SGK1,SC…
GOBPID	GO:0050715	6.29154e-05	4.91714	2.72037	11	52	positive regulation of cytokine secretion	HTR2B,IL1A,IL10,CCL3,SYK,TLR2,TWIST1,WNT5A,CLEC4E,PYCARD,CRTAM
GOBPID	GO:0036296	6.35953e-05	9.13284	1.09861	7	21	response to increased oxygen levels	CAT,CDKN1A,IL18,SERPINE1,SOD2,WNT5A,PDPN
GOBPID	GO:0055093	6.35953e-05	9.13284	1.09861	7	21	response to hyperoxia	CAT,CDKN1A,IL18,SERPINE1,SOD2,WNT5A,PDPN
GOBPID	GO:0042325	6.41314e-05	1.73032	42.2703	68	808	regulation of phosphorylation	ADCY7,BMP2,CCNE1,CCNG1,CD80,CD36,CD40,CD44,CDKN1A,CDKN1C,DUSP1,DUSP4,DUSP5,DUSP6,EDN1,EREG,FLT3,HES1,HTR2B,IGF1,IL1B,IL8,IRAK1,IRAK2,MAP3K5,MT3,OSM,PEBP1,PIK3CG,PPP2R5B,RAP2B,RB1,SDC4,SLC11A1,SNCA,SSR1,SYK,TGFBR1,TNFAIP3,TWIST1,VEGFA,VEGFB,WNT5A,ZP3,LRP8,PPAP2B,CCNA1,HERPUD1,SPRY2,MAD2L2,NPRL2,CAMKK2,GREM1,NPTN,SERTAD1,INPP5K,PID1,IMPACT,RAP2C,SRPRB,SAMSN1,FAM58A,FAM129A,PPARGC1B,CCNYL1,CNKSR3,SP…
GOBPID	GO:0001944	6.41991e-05	1.96097	25.3203	46	484	vasculature development	ADM,S1PR1,EDN1,EFNB2,EPHB2,EREG,FZD2,HHEX,HES1,IGF1,IL1A,IL1B,IL8,IL18,ITGAV,ITGB8,JUNB,LYL1,MMP19,NCL,NFATC3,SERPINE1,SERPINF1,PRKX,PTGS2,PTPRM,SYK,TGFBR1,TNFAIP3,TWIST1,VEGFA,VEGFB,WNT5A,PPAP2B,SLC12A6,SEMA3C,PDPN,PLXND1,HEY1,GPR124,GREM1,HIPK2,TNFRSF12A,ERAP1,ARHGAP22,NAA15
GOBPID	GO:0045321	6.91239e-05	1.92464	26.8898	48	514	leukocyte activation	ATM,BCL6,CD80,CD38,CD40,CD48,CDKN1A,MAP3K8,DOCK2,EDN1,FLT3,LRRC32,HHEX,HLX,HES1,ICAM1,IGF1,IL1B,IL2RA,IL8,IL10,IL18,IMPDH2,LYL1,MNDA,MSH2,MT1G,PNP,PIK3CG,PVRL2,CCL3,SLAMF1,SLC11A1,SNCA,SRC,STAT5A,SYK,TNFAIP3,WNT5A,ZP3,VNN1,EBI3,SWAP70,BLNK,TLR7,GIMAP5,PAG1,SAMSN1
GOBPID	GO:0071219	6.97151e-05	3.62748	4.76064	15	91	cellular response to molecule of bacterial origin	CD36,ICAM1,IRF8,IL1B,IL8,IL10,IL18,IRAK1,IRAK2,SERPINE1,CCL3,TLR2,TNFAIP3,WNT5A,TNIP3
GOBPID	GO:0071216	7.49143e-05	3.4215	5.3361	16	102	cellular response to biotic stimulus	CD36,ICAM1,IRF8,IL1B,IL8,IL10,IL18,IRAK1,IRAK2,SERPINE1,CCL3,SYK,TLR2,TNFAIP3,WNT5A,TNIP3
GOBPID	GO:0006935	7.66841e-05	1.864	30.0286	52	574	chemotaxis	ABL2,AP2A2,CMKLR1,DOCK2,S1PR1,EDN1,EFNB2,EPHB2,FPR2,CXCL1,CXCL3,HSP90AB1,IL1B,IL8,IL10,IL16,ITGAV,LAMC1,LSP1,MPP1,MYH11,SERPINE1,PIK3CG,PLAUR,PLP2,PPBP,PTPRM,CCL1,CCL3,CCL15,CCL20,CCL23,CXCL6,CXCL5,SRC,SYK,VEGFA,VEGFB,WNT5A,NR4A3,CXCL14,TUBB3,SEMA3C,PLXND1,GPR124,GREM1,EMR2,SBDS,EVL,TREM2,ENAH,CMTM7
GOBPID	GO:0042330	7.66841e-05	1.864	30.0286	52	574	taxis	ABL2,AP2A2,CMKLR1,DOCK2,S1PR1,EDN1,EFNB2,EPHB2,FPR2,CXCL1,CXCL3,HSP90AB1,IL1B,IL8,IL10,IL16,ITGAV,LAMC1,LSP1,MPP1,MYH11,SERPINE1,PIK3CG,PLAUR,PLP2,PPBP,PTPRM,CCL1,CCL3,CCL15,CCL20,CCL23,CXCL6,CXCL5,SRC,SYK,VEGFA,VEGFB,WNT5A,NR4A3,CXCL14,TUBB3,SEMA3C,PLXND1,GPR124,GREM1,EMR2,SBDS,EVL,TREM2,ENAH,CMTM7
GOBPID	GO:0019220	7.83505e-05	1.68472	46.5601	73	890	regulation of phosphate metabolic process	ADCY7,BMP2,CCNE1,CCNG1,CD80,CD36,CD40,CD44,CDKN1A,CDKN1C,RCAN1,DUSP1,DUSP4,DUSP5,DUSP6,EDN1,EREG,FLT3,HES1,HTR2B,IGF1,IL1B,IL8,IRAK1,IRAK2,MAP3K5,MT3,OSM,PEBP1,PIK3CG,PPP2R5B,RAP2B,RB1,SDC4,SLC11A1,SNCA,SSR1,SYK,TGFBR1,TNFAIP3,TWIST1,VEGFA,VEGFB,WNT5A,ZP3,LRP8,AKAP1,PPAP2B,URI1,CCNA1,HERPUD1,SPRY2,MAD2L2,NPRL2,CAMKK2,GREM1,NPTN,SERTAD1,INPP5K,PID1,IMPACT,RAP2C,SRPRB,SAMSN1,CSRNP2,FAM58A,FAM129A,W…
GOBPID	GO:0051174	7.83505e-05	1.68472	46.5601	73	890	regulation of phosphorus metabolic process	ADCY7,BMP2,CCNE1,CCNG1,CD80,CD36,CD40,CD44,CDKN1A,CDKN1C,RCAN1,DUSP1,DUSP4,DUSP5,DUSP6,EDN1,EREG,FLT3,HES1,HTR2B,IGF1,IL1B,IL8,IRAK1,IRAK2,MAP3K5,MT3,OSM,PEBP1,PIK3CG,PPP2R5B,RAP2B,RB1,SDC4,SLC11A1,SNCA,SSR1,SYK,TGFBR1,TNFAIP3,TWIST1,VEGFA,VEGFB,WNT5A,ZP3,LRP8,AKAP1,PPAP2B,URI1,CCNA1,HERPUD1,SPRY2,MAD2L2,NPRL2,CAMKK2,GREM1,NPTN,SERTAD1,INPP5K,PID1,IMPACT,RAP2C,SRPRB,SAMSN1,CSRNP2,FAM58A,FAM129A,W…
GOBPID	GO:0042981	8.27484e-05	1.59359	61.4175	91	1174	regulation of apoptotic process	ADM,APEX1,ATM,BCL6,BMP2,CASP5,CAT,CCNG1,CD38,CD40,CD44,CDKN1A,CLU,PLK3,NQO1,DUSP1,DUSP6,EDN1,CLN8,FLT3,FXN,KAT2A,HTR2B,IFI16,IGF1,IL1A,IL1B,IL2RA,IL10,IL18,IRAK1,ITGAV,MCL1,MAP3K5,MNDA,CITED1,MSH2,MT3,SERPINE1,PHB,SERPINB9,PIK3CG,PLAGL2,PLAUR,PMAIP1,POLB,PPP3CC,LGMN,PTGS2,PVRL2,CCL3,SGK1,SKIL,SNAI1,SNCA,SOD2,STAT5A,TGFBR1,TIMP1,TLR2,TNFAIP3,TRAF5,VEGFA,VEGFB,WNT5A,BTG2,NR4A3,DYRK2,CSDA,NCOA1,URI1…
GOBPID	GO:0060326	8.43394e-05	2.99182	7.1148	19	136	cell chemotaxis	CMKLR1,EDN1,CXCL3,IL1B,IL8,IL10,IL16,MPP1,SERPINE1,PIK3CG,CCL3,CCL23,SYK,VEGFA,VEGFB,WNT5A,GREM1,EMR2,SBDS
GOBPID	GO:0048583	9.1897e-05	1.44421	113.471	151	2169	regulation of response to stimulus	ADM,AP2A2,AP1B1,APEX1,ARHGAP5,ATM,ATR,BCL6,BMP2,CAT,CD80,CD36,CD38,CD40,CD44,CDKN1C,CISH,CLU,CMKLR1,CYP27B1,DOCK2,HBEGF,DUSP1,DUSP4,DUSP5,DUSP6,S1PR1,EDN1,EFNB2,EREG,EZH2,FLT3,FYB,HHEX,HLX,HES1,HSP90AB1,HTR2B,ICAM1,IGF1,IL1A,IL1B,IL2RA,IL8,IL10,IL16,IL18,IRAK1,IRAK2,LTBR,MCL1,MAP3K5,MFNG,MNDA,MPP1,CITED1,MT3,MYO5A,NT5E,OSM,PEBP1,SERPINE1,SERPINF1,PHB,PIK3CG,PLAUR,PMAIP1,PPP2R5B,PTGS2,PTPN1,PTPN2,…
GOBPID	GO:0048646	9.31373e-05	1.74267	38.8175	63	742	anatomical structure formation involved in morphogenesis	ADM,ATM,CCNG1,CD36,DUSP1,DUSP4,DUSP5,DUSP6,S1PR1,EDN1,EFNB2,EPHB2,EREG,KAT2A,HHEX,HES1,IL1A,IL1B,IL8,IL18,ITGAV,JUNB,MMP19,MYH11,NCL,NFATC3,SERPINE1,SERPINF1,PMP22,PRKX,PTGS2,PTPRM,PVRL2,SKIL,SNAI1,SYK,TNFAIP3,TWIST1,VEGFA,VEGFB,WNT5A,WNT6,ZP3,LRP8,NR4A3,HS2ST1,SLC12A6,SEMA3C,DEAF1,PLXND1,HEY1,GPR124,GREM1,HIPK2,TNFRSF12A,ERAP1,ENAH,TWSG1,CCNB1IP1,ARHGAP22,NAA15,ARL6,PPARGC1B
GOBPID	GO:0051704	0.000101761	1.62118	54.3027	82	1038	multi-organism process	ADH5,ADM,AP2A2,AP1B1,BIN1,C1QBP,CD80,CD36,CD38,CD40,CEBPA,CLU,CYP27B1,DOCK2,EDN1,EFNB2,CLN8,ACSL4,FKBP4,KAT2A,ICAM1,IRF8,IDE,IFI16,IL1A,IL1B,IL2RA,IL8,IL10,IL16,IL18,IDO1,IRAK1,IRAK2,ITGAV,JUNB,LTBR,MAOB,MAP3K5,MGST1,MMP1,CITED1,ODC1,SERPINE1,PCSK5,SERPINA1,PPAT,PPBP,PTGS2,PVRL2,RB1,ABCE1,S100A12,CCL3,CCL20,SLAMF1,SLC11A1,SNCA,SOD2,SRC,STAT2,STAT5A,SYK,TGFBR1,TIMP1,TLR2,TNFAIP3,WNT5A,URI1,ABCC5,T…
GOBPID	GO:0010941	0.000102436	1.57492	63.4578	93	1213	regulation of cell death	ADM,APEX1,ATM,BCL6,BMP2,CASP5,CAT,CCNG1,CD38,CD40,CD44,CDKN1A,CLU,PLK3,NQO1,DUSP1,DUSP6,EDN1,CLN8,FLT3,FXN,KAT2A,HTR2B,IFI16,IGF1,IL1A,IL1B,IL2RA,IL10,IL18,IRAK1,ITGAV,MCL1,MAP3K5,MNDA,CITED1,MSH2,MT3,SERPINE1,PHB,SERPINB9,PIK3CG,PLAGL2,PLAUR,PMAIP1,POLB,PPP3CC,LGMN,PTGS2,PVRL2,CCL3,SGK1,SKIL,SNAI1,SNCA,SOD2,STAT5A,TGFBR1,TIMP1,TLR2,TNFAIP3,TRAF5,VEGFA,VEGFB,WNT5A,BTG2,NR4A3,DYRK2,CSDA,NCOA1,URI1…
GOBPID	GO:0001816	0.000103038	2.03807	20.6643	39	395	cytokine production	BCL6,CD80,CD36,CD40,CMKLR1,EREG,LRRC32,HTR2B,IRF8,IL1A,IL1B,IL10,IL18,PNP,SERPINE1,PCSK5,PIK3CG,PTGS2,CCL3,SLC11A1,STAT5A,SYK,TLR2,TLR5,TNFAIP3,TWIST1,UBA7,WNT5A,ZP3,EBI3,POLR3G,CLEC4E,PYCARD,IL19,TLR7,GIMAP5,POLR3B,SULF2,CRTAM
GOBPID	GO:0043067	0.000108817	1.57932	61.8883	91	1183	regulation of programmed cell death	ADM,APEX1,ATM,BCL6,BMP2,CASP5,CAT,CCNG1,CD38,CD40,CD44,CDKN1A,CLU,PLK3,NQO1,DUSP1,DUSP6,EDN1,CLN8,FLT3,FXN,KAT2A,HTR2B,IFI16,IGF1,IL1A,IL1B,IL2RA,IL10,IL18,IRAK1,ITGAV,MCL1,MAP3K5,MNDA,CITED1,MSH2,MT3,SERPINE1,PHB,SERPINB9,PIK3CG,PLAGL2,PLAUR,PMAIP1,POLB,PPP3CC,LGMN,PTGS2,PVRL2,CCL3,SGK1,SKIL,SNAI1,SNCA,SOD2,STAT5A,TGFBR1,TIMP1,TLR2,TNFAIP3,TRAF5,VEGFA,VEGFB,WNT5A,BTG2,NR4A3,DYRK2,CSDA,NCOA1,URI1…
GOBPID	GO:0044271	0.00010927	1.99307	22.1814	41	424	cellular nitrogen compound biosynthetic process	ACADM,ADCY7,ADM,ADORA3,AMPD3,ATIC,ATP1B1,ATP5D,CEBPA,NQO1,EDN1,FXN,HSP90AB1,HTR2B,ICAM1,IL1B,IL10,IMPDH2,MTHFD1,PNP,NT5E,ODC1,PPAT,PTGS2,SNCA,SOD2,SRM,TLR2,UPP1,KYNU,PAPSS2,PAPSS1,C16orf7,NAMPT,GPHN,PAICS,ATP2C1,SMOX,PID1,GIMAP5,QTRT1
GOBPID	GO:0048523	0.000113234	1.40143	140.047	180	2677	negative regulation of cellular process	ADM,AP2A2,APEX1,ASCL2,ATM,ATR,BACH1,BCL6,BMP2,CASP5,CAT,CCNG1,CD36,CD38,CD44,CDKN1A,CDKN1C,CEBPA,CISH,CLU,PLK3,CYP27B1,RCAN1,HBEGF,DUSP1,DUSP4,DUSP5,DUSP6,S1PR1,EDN1,CLN8,EREG,EZH2,BPTF,FKBP4,FLT3,FXN,LRRC32,CXCL1,HHEX,HLX,HES1,HSP90AB1,HTR2B,IRF8,IDE,IFI16,IGF1,IL1A,IL1B,IL2RA,IL8,IL10,INSIG1,IRAK1,ITGAV,MAOB,MCL1,MCM6,MNDA,CITED1,MSH2,MT3,MXI1,NAB2,NFIL3,OSM,PEBP1,SERPINE1,SERPINF1,PHB,SERPINB9…
GOBPID	GO:0009617	0.000114509	2.11695	17.8916	35	342	response to bacterium	ADH5,ADM,CD36,CYP27B1,EDN1,ICAM1,IRF8,IL1A,IL1B,IL8,IL10,IL18,IRAK1,IRAK2,MAOB,MGST1,CITED1,SERPINE1,SERPINA1,PPBP,PTGS2,S100A12,CCL3,CCL20,SLC11A1,SNCA,SOD2,SYK,TLR2,TNFAIP3,WNT5A,ABCC5,ERAP1,HAMP,TNIP3
GOBPID	GO:0001819	0.000118985	2.58887	9.78285	23	187	positive regulation of cytokine production	CD36,CD40,EREG,HTR2B,IRF8,IL1A,IL1B,IL18,SERPINE1,PTGS2,CCL3,SLC11A1,TLR2,TLR5,TWIST1,WNT5A,ZP3,POLR3G,PYCARD,TLR7,GIMAP5,POLR3B,SULF2
GOBPID	GO:0050671	0.000130443	3.40231	5.02221	15	96	positive regulation of lymphocyte proliferation	BCL6,CD80,CD38,CD40,CDKN1A,HES1,IGF1,IL1B,IL2RA,IL18,PNP,STAT5A,SYK,ZP3,EBI3
GOBPID	GO:0007154	0.000145069	1.33088	239.758	286	4583	cell communication	ABL2,ADCY7,ADM,ADORA3,AP2A2,ARF4,RND3,ARHGAP5,ATM,ATR,BCL6,BMP2,CAT,CCNE1,CD80,CD36,CD38,CD40,CD44,CD48,CDK4,CDKN1A,CDKN1C,CEBPA,CISH,CLU,CMKLR1,PLK3,CYP27B1,NQO1,RCAN1,HBEGF,DUSP1,DUSP4,DUSP5,DUSP6,S1PR1,EDN1,EFNB2,EPHB2,CLN8,EREG,EZH2,FKBP4,FLT3,FNTA,FPR2,FXN,FYB,FZD2,GEM,GJB2,GNA15,NR3C1,CXCL1,HHEX,HES1,HSP90AB1,HTR2B,ICAM1,IRF8,IDE,IFI16,IGF1,IL1A,IL1B,IL2RA,IL3RA,IL8,IL10,IL18,INSIG1,IRAK1,I…
GOBPID	GO:0032946	0.000146991	3.36057	5.07453	15	97	positive regulation of mononuclear cell proliferation	BCL6,CD80,CD38,CD40,CDKN1A,HES1,IGF1,IL1B,IL2RA,IL18,PNP,STAT5A,SYK,ZP3,EBI3
GOBPID	GO:0048519	0.00015166	1.37889	153.596	194	2936	negative regulation of biological process	ADM,AP2A2,APEX1,ASCL2,ATM,ATR,BACH1,BCL6,BMP2,CASP5,CAT,CCNG1,CD36,CD38,CD44,CDKN1A,CDKN1C,CEBPA,CISH,CLU,CMKLR1,PLK3,CYP27B1,RCAN1,HBEGF,DUSP1,DUSP4,DUSP5,DUSP6,S1PR1,EDN1,CLN8,EREG,EZH2,BPTF,FKBP4,FLT3,FXN,LRRC32,CXCL1,HHEX,HLX,HES1,HSP90AB1,HTR2B,ICAM1,IRF8,IDE,IFI16,IGF1,IL1A,IL1B,IL2RA,IL8,IL10,INSIG1,IRAK1,ITGAV,MAOB,MCL1,MCM6,MNDA,CITED1,MSH2,MT1A,MT1E,MT1G,MT1M,MT2A,MT3,MXI1,NAB2,NFIL3,NT…
GOBPID	GO:0031347	0.000157212	1.99208	21.0828	39	403	regulation of defense response	AP2A2,AP1B1,BCL6,DOCK2,DUSP4,DUSP6,EREG,HSP90AB1,IL1B,IL2RA,IL10,IL18,IRAK1,IRAK2,NT5E,OSM,SERPINE1,SERPINF1,PIK3CG,PTGS2,PTPN1,PTPN2,PVRL2,CCL3,STAT2,STAT5A,TLR2,TLR5,TNFAIP3,WNT5A,ZP3,TNIP1,POLR3G,TLR7,ERAP1,GIMAP5,POLR3B,CRTAM,TNIP3
GOBPID	GO:0051173	0.000170203	1.57916	57.6508	85	1102	positive regulation of nitrogen compound metabolic process	ADCY7,ADM,ADORA3,APEX1,BMP2,CCNE1,CD80,CD38,CD40,CDKN1C,CEBPA,DBP,S1PR1,EDN1,EREG,ETS2,BPTF,FZD2,GTF2F2,HHEX,HES1,HSP90AB1,ICAM1,IRF8,IGF1,IL1B,IL10,INSIG1,IRAK1,JUNB,LYL1,MAOB,CITED1,MT3,MTF1,NDP,NFATC3,OSM,PEBP1,PHB,PTGS2,RAD51,RB1,SLC11A1,SNAI1,SOD2,SS18,STAT5A,SUPT5H,TGFBR1,TLR2,TWIST1,VEGFA,WNT5A,WNT6,ZP3,BTG2,NCOA1,HMGN3,SRA1,TRIM28,TNIP1,MAD2L2,CAMKK2,GREM1,HIPK2,SERTAD1,INSIG2,INPP5K,TESC…
GOBPID	GO:0033554	0.000170401	1.575	58.4879	86	1118	cellular response to stress	ADM,PARP1,APEX1,ATM,ATR,BACH1,BCL6,CAT,CCNG1,CD36,CD44,CDKN1A,PLK3,VCAN,DDX1,DUSP4,DUSP6,EDN1,FXN,ICAM1,IFI16,IL1A,IL1B,IL8,IL18,INSIG1,IRAK1,IRAK2,LTBR,MAP3K5,MGST1,MNDA,MSH2,MT3,NTHL1,PMAIP1,POLB,PPP2R5B,PTGS2,PTPN1,RAD51,RAD51C,SLC2A1,SNAI1,SNCA,SOD2,SSR1,SUPT5H,SYK,TWIST1,VEGFA,WNT5A,BTG2,NR4A3,DYRK2,RUVBL1,CRADD,HERPUD1,MTSS1,SLC12A6,TRAP1,TRIM28,MAD2L2,FBLN5,PPP1R15A,INTS7,MYOF,SESN1,PRPF19…
GOBPID	GO:0001568	0.000176276	1.91087	24.1694	43	462	blood vessel development	ADM,S1PR1,EDN1,EFNB2,EPHB2,EREG,HHEX,HES1,IL1A,IL1B,IL8,IL18,ITGAV,ITGB8,JUNB,LYL1,MMP19,NCL,NFATC3,SERPINE1,SERPINF1,PRKX,PTGS2,PTPRM,SYK,TGFBR1,TNFAIP3,TWIST1,VEGFA,VEGFB,WNT5A,PPAP2B,SLC12A6,SEMA3C,PLXND1,HEY1,GPR124,GREM1,HIPK2,TNFRSF12A,ERAP1,ARHGAP22,NAA15
GOBPID	GO:0050670	0.000182193	2.7987	7.53332	19	144	regulation of lymphocyte proliferation	ATM,BCL6,CD80,CD38,CD40,CDKN1A,LRRC32,HES1,IGF1,IL1B,IL2RA,IL10,IL18,MNDA,PNP,STAT5A,SYK,ZP3,EBI3
GOBPID	GO:0048514	0.000183395	1.97535	21.2398	39	406	blood vessel morphogenesis	ADM,S1PR1,EDN1,EFNB2,EPHB2,EREG,HHEX,HES1,IL1A,IL1B,IL8,IL18,ITGAV,JUNB,MMP19,NCL,NFATC3,SERPINE1,SERPINF1,PRKX,PTGS2,PTPRM,SYK,TGFBR1,TNFAIP3,TWIST1,VEGFA,VEGFB,WNT5A,SLC12A6,PLXND1,HEY1,GPR124,GREM1,HIPK2,TNFRSF12A,ERAP1,ARHGAP22,NAA15
GOBPID	GO:0050794	0.0001887	1.31133	397.121	445	7591	regulation of cellular process	ABL2,ADCY7,ADM,ADORA3,PARP1,AP2A2,BIN1,APEX1,ARF4,RND3,ARHGAP5,ASCL2,ATM,ATR,BACH1,BCL6,BMP2,ZFP36L2,CASP5,CAT,CCNE1,CCNG1,CD80,CD36,CD38,CD40,CD44,CD48,CDK4,CDKN1A,CDKN1C,CEBPA,RCC1,CISH,CLU,CMKLR1,PLK3,MAP3K8,CYP27B1,DBP,DDX1,NQO1,ARID3A,RCAN1,HBEGF,DUSP1,DUSP4,DUSP5,DUSP6,S1PR1,EDN1,EFNB2,EPHB2,CLN8,EREG,ETS2,EZH2,ACSL1,ACSL4,BPTF,FKBP4,FLI1,FLT3,FNTA,FOSL2,FPR2,FXN,FYB,FZD2,LRRC32,KAT2A,GEM,G…
GOBPID	GO:0044238	0.000188866	1.32245	451.214	498	8625	primary metabolic process	ABL2,ACADM,ADCY7,ADH5,ADM,ADORA3,PARP1,AHCY,AK4,AMPD3,BIN1,APEX1,ARF4,RND3,ARHGAP5,ASCL2,ATIC,ATM,ATP1B1,ATP5D,ATR,BACH1,BCAT1,BCL6,BLMH,BMP2,ZFP36L2,C1QBP,CASP5,CAT,SERPINH1,CCNE1,CCNG1,CD80,CD36,CD38,CD40,CD44,CDK4,CDKN1A,CDKN1C,CEBPA,CHI3L2,CISH,CLU,CMKLR1,PLK3,MAP3K8,CSTA,CTSZ,CYP27B1,DBP,AKR1C1,DDX1,NQO1,DKC1,DNASE2,ARID3A,RCAN1,HBEGF,DUSP1,DUSP4,DUSP5,DUSP6,ECHS1,S1PR1,EDN1,EIF2S3,EPHB2,CLN…
GOBPID	GO:0001666	0.000189125	2.39256	11.4046	25	218	response to hypoxia	ADM,ASCL2,ATM,ATP1B1,BACH1,BMP2,CAT,CD38,PLK3,EDN1,ICAM1,IL1A,IL1B,IL18,MT3,SERPINA1,PMAIP1,PTGS2,SDC2,SOD2,TGFBR1,TWIST1,VEGFA,HIPK2,DDIT4
GOBPID	GO:0009891	0.000190921	1.55344	62.0453	90	1186	positive regulation of biosynthetic process	ADCY7,ADM,ADORA3,BMP2,CCNE1,CD80,CD38,CD40,CDKN1C,CEBPA,DBP,S1PR1,EDN1,EREG,ETS2,BPTF,FZD2,GTF2F2,HHEX,HES1,HSP90AB1,ICAM1,IRF8,IGF1,IL1A,IL1B,IL10,IL18,INSIG1,IRAK1,JUNB,LYL1,CITED1,MT3,MTF1,NDP,NFATC3,OSM,PHB,PTGS2,RB1,SLC11A1,SNAI1,SNCA,SOD2,SS18,STAT5A,SUPT5H,SYK,TGFBR1,TLR2,TWIST1,VEGFA,WNT5A,WNT6,ZP3,DYRK2,NCOA1,HMGN3,SRA1,NAMPT,EBI3,TRIM28,TNIP1,MAD2L2,CAMKK2,GREM1,HIPK2,SERTAD1,INSIG2,TLR…
GOBPID	GO:0007243	0.000191812	1.69937	39.0268	62	746	intracellular protein kinase cascade	CD36,CD40,CD44,CISH,PLK3,HBEGF,DUSP4,DUSP6,EDN1,FLT3,FYB,HES1,HTR2B,IGF1,IL1A,IL1B,IL10,IL18,IRAK1,IRAK2,ITGAV,LTBR,MAP3K5,MT3,OSM,PEBP1,PIK3C2B,PIK3CG,PTPN1,S100A12,CCL3,SRC,SS18,STAT2,STAT5A,SYK,TGFBR1,TIMP2,TLR2,TNFAIP3,TRAF5,VEGFA,VEGFB,WNT5A,ZP3,SOCS2,TANK,SPRY2,TNIP1,MERTK,CAMKK2,TRAF3IP2,AKAP11,RASGRP3,GREM1,ATP2C1,HIPK2,TLR7,INPP5K,TERF2IP,TNIP3,CNKSR3
GOBPID	GO:0071496	0.000191969	2.34374	12.0847	26	231	cellular response to external stimulus	ABL2,CASP5,CCNE1,CD40,CDKN1A,CYP27B1,FZD2,ICAM1,IL1B,IL18,LDHA,LTBR,PMAIP1,SLC2A1,SUPT5H,TLR5,WNT5A,WNT6,NCOA1,CRADD,TLR7,TESC,TP53INP2,MAP1LC3A,ATG4C,EIF2AK4
GOBPID	GO:0032944	0.000199636	2.77628	7.58563	19	145	regulation of mononuclear cell proliferation	ATM,BCL6,CD80,CD38,CD40,CDKN1A,LRRC32,HES1,IGF1,IL1B,IL2RA,IL10,IL18,MNDA,PNP,STAT5A,SYK,ZP3,EBI3
GOBPID	GO:0043491	0.000201522	3.42641	4.65601	14	89	protein kinase B signaling cascade	PLK3,HBEGF,IGF1,IL1B,MT3,PIK3C2B,PIK3CG,CCL3,TGFBR1,VEGFB,ZP3,SPRY2,MERTK,INPP5K
GOBPID	GO:0008284	0.000205745	1.78221	31.2319	52	597	positive regulation of cell proliferation	ADM,BCL6,BMP2,CD80,CD38,CD40,CDK4,CDKN1A,CLU,HBEGF,S1PR1,EDN1,EREG,FLT3,FOSL2,FXN,HLX,HES1,HTR2B,IGF1,IL1B,IL2RA,IL18,ITGAV,LAMC1,MMP12,PNP,ODC1,OSM,PTGS2,CXCL5,SHMT2,SLAMF1,SSR1,STAT5A,SYK,TGFBR1,TIMP1,TNFAIP3,TRAF5,VEGFA,VEGFB,WNT5A,ZP3,TSC22D1,NAMPT,EBI3,GREM1,HIPK2,SERTAD1,PID1,CDCA7L
GOBPID	GO:0070665	0.000208042	3.24125	5.23147	15	100	positive regulation of leukocyte proliferation	BCL6,CD80,CD38,CD40,CDKN1A,HES1,IGF1,IL1B,IL2RA,IL18,PNP,STAT5A,SYK,ZP3,EBI3
GOBPID	GO:0051246	0.000210214	1.52156	69.0031	98	1319	regulation of protein metabolic process	ADCY7,BMP2,SERPINH1,CCNE1,CCNG1,CD80,CD36,CD40,CD44,CDKN1A,CDKN1C,CLU,PLK3,DDX1,DUSP1,DUSP4,DUSP5,DUSP6,EDN1,CLN8,EREG,FLT3,FNTA,HES1,HSP90AB1,HTR2B,IDE,IGF1,IL1A,IL1B,IL8,IL10,IRAK1,IRAK2,ITGAV,MAP3K5,MT3,OSM,PEBP1,SERPINE1,SERPINF1,SERPINA1,SERPINB9,PIK3CG,PLAUR,PPP2R5B,RAP2B,RB1,SDC4,SLC11A1,SNCA,SSR1,STAT5A,SYK,TGFBR1,TIMP1,TLR2,TNFAIP3,TWIST1,VEGFA,VEGFB,WNT5A,ZP3,LRP8,AKAP1,PPAP2B,CDC16,CCN…
GOBPID	GO:0071248	0.000212896	3.61306	4.13286	13	79	cellular response to metal ion	CEBPA,HTR2B,JUNB,MT1A,MT1E,MT1G,MT1M,MT2A,MT3,NFATC3,SNCA,WNT5A,CLIC4
GOBPID	GO:0036293	0.000218183	2.36767	11.5092	25	220	response to decreased oxygen levels	ADM,ASCL2,ATM,ATP1B1,BACH1,BMP2,CAT,CD38,PLK3,EDN1,ICAM1,IL1A,IL1B,IL18,MT3,SERPINA1,PMAIP1,PTGS2,SDC2,SOD2,TGFBR1,TWIST1,VEGFA,HIPK2,DDIT4
GOBPID	GO:0009167	0.000218815	7.10125	1.30787	7	25	purine ribonucleoside monophosphate metabolic process	AK4,AMPD3,ATIC,IMPDH2,NT5E,PPAT,PAICS
GOBPID	GO:0043516	0.000218815	7.10125	1.30787	7	25	regulation of DNA damage response, signal transduction by p53 class mediator	ATM,ATR,CD44,PMAIP1,SNAI1,TWIST1,SPRED2
GOBPID	GO:0071294	0.000225044	13.0188	0.627777	5	12	cellular response to zinc ion	MT1A,MT1E,MT1G,MT1M,MT2A
GOBPID	GO:0008285	0.000233942	1.85435	26.0004	45	497	negative regulation of cell proliferation	ADM,ASCL2,ATM,BCL6,BMP2,CDKN1A,CDKN1C,CEBPA,CYP27B1,EREG,FLT3,LRRC32,CXCL1,HES1,IGF1,IL1A,IL1B,IL2RA,IL8,IL10,MNDA,MXI1,OSM,SERPINF1,PHB,PMAIP1,PMP22,PTGS2,PTPRM,RARRES3,RB1,CCL23,SOD2,TIMP2,TNFAIP3,WNT5A,BTG2,PPAP2A,MTSS1,SPRY2,BTG3,GREM1,SESN1,TESC,E2F7
GOBPID	GO:0002685	0.00024226	3.55887	4.18518	13	80	regulation of leukocyte migration	CMKLR1,EDN1,ICAM1,IL8,MPP1,SERPINE1,CCL3,TLR2,VEGFA,VEGFB,WNT5A,ZP3,GREM1
GOBPID	GO:0002687	0.000243724	4.11193	3.13888	11	60	positive regulation of leukocyte migration	CMKLR1,EDN1,ICAM1,IL8,SERPINE1,CCL3,TLR2,VEGFA,VEGFB,WNT5A,ZP3
GOBPID	GO:0040012	0.000247839	1.9427	21.5537	39	412	regulation of locomotion	ABL2,BMP2,CMKLR1,HBEGF,S1PR1,EDN1,EFNB2,ICAM1,IGF1,IL8,IL16,ITGAV,MMP10,MPP1,SERPINE1,PRKX,PTGS2,PTPRM,RAP2B,CCL3,SGK1,SNAI1,SNCA,TIMP1,TLR2,TWIST1,VEGFA,VEGFB,WNT5A,ZP3,PPAP2B,PDPN,PLXND1,KANK1,CLIC4,GPR124,GREM1,ABI3,RAP2C
GOBPID	GO:0010557	0.00025042	1.57423	54.9828	81	1051	positive regulation of macromolecule biosynthetic process	BMP2,CCNE1,CD80,CD38,CD40,CDKN1C,CEBPA,DBP,S1PR1,EDN1,EREG,ETS2,BPTF,FZD2,GTF2F2,HHEX,HES1,IRF8,IGF1,IL1A,IL1B,IL10,IL18,INSIG1,IRAK1,JUNB,LYL1,CITED1,MT3,MTF1,NDP,NFATC3,OSM,PHB,RB1,SLC11A1,SNAI1,SS18,STAT5A,SUPT5H,SYK,TGFBR1,TLR2,TWIST1,VEGFA,WNT5A,WNT6,ZP3,DYRK2,NCOA1,HMGN3,SRA1,NAMPT,EBI3,TRIM28,TNIP1,MAD2L2,CAMKK2,GREM1,HIPK2,SERTAD1,INSIG2,TLR7,INPP5K,TESC,PID1,CDK5RAP2,ARNTL2,TP53INP2,CSRN…
GOBPID	GO:0031328	0.000256166	1.54497	60.8943	88	1164	positive regulation of cellular biosynthetic process	ADCY7,ADM,ADORA3,BMP2,CCNE1,CD80,CD38,CD40,CDKN1C,CEBPA,DBP,S1PR1,EDN1,EREG,ETS2,BPTF,FZD2,GTF2F2,HHEX,HES1,HSP90AB1,ICAM1,IRF8,IGF1,IL1A,IL1B,IL10,INSIG1,IRAK1,JUNB,LYL1,CITED1,MT3,MTF1,NDP,NFATC3,OSM,PHB,PTGS2,RB1,SLC11A1,SNAI1,SNCA,SOD2,SS18,STAT5A,SUPT5H,SYK,TGFBR1,TLR2,TWIST1,VEGFA,WNT5A,WNT6,ZP3,DYRK2,NCOA1,HMGN3,SRA1,EBI3,TRIM28,TNIP1,MAD2L2,CAMKK2,GREM1,HIPK2,SERTAD1,INSIG2,TLR7,INPP5K,TE…
GOBPID	GO:0048545	0.000278143	2.11011	15.8514	31	303	response to steroid hormone stimulus	ADM,CCNE1,CD38,CDKN1A,CEBPA,CYP27B1,RCAN1,DUSP1,EDN1,NR3C1,GSTM3,IL1B,IL10,JUNB,MAOB,CITED1,PEBP1,SERPINE1,SERPINF1,SERPINA1,SERPINB9,PTGS2,SRC,TGFBR1,WNT5A,PRDM2,NR4A3,NCOA1,URI1,SOCS2,PPARGC1B
GOBPID	GO:0009126	0.000286028	6.727	1.36018	7	26	purine nucleoside monophosphate metabolic process	AK4,AMPD3,ATIC,IMPDH2,NT5E,PPAT,PAICS
GOBPID	GO:0050869	0.000286028	6.727	1.36018	7	26	negative regulation of B cell activation	ATM,BCL6,FLT3,IL10,MNDA,TNFAIP3,SAMSN1
GOBPID	GO:0010628	0.000288306	1.58391	51.8962	77	992	positive regulation of gene expression	BMP2,CCNE1,CD80,CD38,CD40,CDKN1C,CEBPA,DBP,S1PR1,ETS2,BPTF,FZD2,LRRC32,GTF2F2,HHEX,HES1,IRF8,IGF1,IL1B,IL10,IL18,INSIG1,IRAK1,JUNB,LYL1,CITED1,MT3,MTF1,NDP,NFATC3,NFIL3,OSM,PHB,PLAUR,RB1,CCL3,SLC11A1,SNAI1,SS18,STAT5A,SUPT5H,TGFBR1,TLR2,TWIST1,VEGFA,WNT5A,WNT6,ZP3,NCOA1,HMGN3,SRA1,TRIM28,SPRY2,TNIP1,MAD2L2,CAMKK2,GREM1,HIPK2,SERTAD1,INSIG2,INPP5K,TESC,PID1,CDK5RAP2,ARNTL2,TP53INP2,CSRNP1,NAA15,CS…
GOBPID	GO:0001817	0.000292888	2.00333	18.781	35	359	regulation of cytokine production	BCL6,CD80,CD36,CD40,CMKLR1,EREG,LRRC32,HTR2B,IRF8,IL1A,IL1B,IL10,IL18,SERPINE1,PTGS2,CCL3,SLC11A1,STAT5A,SYK,TLR2,TLR5,TNFAIP3,TWIST1,UBA7,WNT5A,ZP3,EBI3,POLR3G,CLEC4E,PYCARD,TLR7,GIMAP5,POLR3B,SULF2,CRTAM
GOBPID	GO:0071310	0.000298993	1.55167	57.8078	84	1105	cellular response to organic substance	ADCY7,PARP1,AQP9,BMP2,CAT,CD36,CD44,CD68,CEBPA,CISH,CLU,CMKLR1,AKR1C1,DUSP1,DUSP6,EDN1,EREG,FLT3,FZD2,NR3C1,HHEX,HSP90AB1,ICAM1,IRF8,IDE,IL1A,IL1B,IL2RA,IL3RA,IL8,IL10,IL18,IRAK1,IRAK2,JUNB,MT1G,MT2A,MT3,PHB,SERPINB9,PLP2,PPAT,PPP2R5B,PTPN1,PTPN2,CCL3,SLC8A3,SNCA,SOD2,SRC,SSR1,STAT2,STAT5A,TGFBR1,TIMP2,UBA7,VEGFA,VEGFB,WNT5A,LRP8,NR4A3,AKAP1,NCOA1,URI1,SOCS2,HMGN3,HERPUD1,NUPL1,EBI3,SPRY2,ST3GAL6…
GOBPID	GO:0032757	0.000303041	8.41969	0.99398	6	19	positive regulation of interleukin-8 production	IL1B,IL18,SERPINE1,TLR2,TLR5,TLR7
GOBPID	GO:0009968	0.000305081	1.7809	29.4009	49	562	negative regulation of signal transduction	ADM,AP2A2,BCL6,BMP2,CD44,CISH,DUSP1,DUSP4,DUSP5,DUSP6,EZH2,HHEX,HTR2B,IGF1,IL1B,IL8,IL10,MCL1,CITED1,PEBP1,PHB,PTPN1,RB1,RGS16,SKIL,SNAI1,SNCA,SRC,TNFAIP3,TWIST1,WNT5A,SOCS2,SPRY2,TNIP1,KANK1,HEY1,GREM1,HIPK2,INPP5K,DDIT4,PID1,PARL,SULF2,TWSG1,TNIP3,SNX25,GLIS2,CNKSR3,SPRED2
GOBPID	GO:0031324	0.00030724	1.52455	63.7716	91	1219	negative regulation of cellular metabolic process	ASCL2,ATR,BACH1,BCL6,BMP2,CD36,CD38,CDKN1A,CDKN1C,CEBPA,PLK3,HBEGF,DUSP1,DUSP4,DUSP5,DUSP6,EDN1,CLN8,EREG,EZH2,BPTF,HHEX,HES1,HSP90AB1,HTR2B,IRF8,IDE,IFI16,IL1B,IL10,INSIG1,IRAK1,ITGAV,CITED1,MSH2,MT3,NAB2,NFIL3,PEBP1,PHB,RB1,RFX5,CCL3,SRSF7,SKIL,SNAI1,SNCA,SUPT5H,TIMP1,TNFAIP3,TWIST1,WNT5A,ZNF189,ZP3,LRP8,AKAP1,CSDA,PPAP2B,URI1,CDC16,DNAJB6,TRIM28,SPRY2,MAD2L2,WWP1,ZHX2,SIN3B,HEY1,GREM1,HIPK2,IN…
GOBPID	GO:0006809	0.000309489	4.35753	2.72037	10	52	nitric oxide biosynthetic process	NQO1,EDN1,HSP90AB1,ICAM1,IL1B,IL10,PTGS2,SOD2,TLR2,GIMAP5
GOBPID	GO:0045428	0.000316872	4.84089	2.24953	9	43	regulation of nitric oxide biosynthetic process	EDN1,HSP90AB1,ICAM1,IL1B,IL10,PTGS2,SOD2,TLR2,GIMAP5
GOBPID	GO:0051707	0.000317867	1.7773	29.4532	49	563	response to other organism	ADH5,ADM,AP2A2,AP1B1,CD36,CD40,CLU,CYP27B1,DOCK2,EDN1,ICAM1,IRF8,IFI16,IL1A,IL1B,IL2RA,IL8,IL10,IL18,IRAK1,IRAK2,MAOB,MGST1,CITED1,ODC1,SERPINE1,SERPINA1,PPBP,PTGS2,ABCE1,S100A12,CCL3,CCL20,SLC11A1,SNCA,SOD2,STAT2,SYK,TLR2,TNFAIP3,WNT5A,URI1,ABCC5,POLR3G,TLR7,ERAP1,POLR3B,HAMP,TNIP3
GOBPID	GO:0009719	0.000318607	1.61891	45.4615	69	869	response to endogenous stimulus	ADCY7,ADM,PARP1,CCNE1,CCNG1,CD36,CD38,CD44,CDKN1A,CEBPA,CISH,CYP27B1,AKR1C1,RCAN1,DUSP1,DUSP6,EDN1,EREG,FZD2,NR3C1,GSTM3,HHEX,ICAM1,IDE,IL1A,IL1B,IL8,IL10,IL18,JUNB,LTA4H,MAOB,MGST1,MMP19,CITED1,MSH2,MT3,PEBP1,SERPINE1,SERPINF1,SERPINA1,SERPINB9,PPAT,PTGS2,PTPN1,PTPN2,SNCA,SRC,STAT5A,TGFBR1,TIMP1,WNT5A,PRDM2,BTG2,NR4A3,AKAP1,NCOA1,URI1,SOCS2,ABCC5,SPRY2,KANK1,NPTN,INSIG2,INPP5K,PID1,SULF2,GNB4,PP…
GOBPID	GO:0009607	0.000319942	1.75552	31.0226	51	593	response to biotic stimulus	ADH5,ADM,AP2A2,AP1B1,CD36,CD40,CLU,CYP27B1,DOCK2,EDN1,ICAM1,IRF8,IFI16,IL1A,IL1B,IL2RA,IL8,IL10,IL18,IRAK1,IRAK2,MAOB,MGST1,CITED1,ODC1,SERPINE1,SERPINA1,PPBP,PTGS2,PVRL2,ABCE1,S100A12,CCL3,CCL20,SLC11A1,SNCA,SOD2,STAT2,SYK,TLR2,TNFAIP3,WNT5A,URI1,ABCC5,POLR3G,TLR7,ERAP1,POLR3B,CRTAM,HAMP,TNIP3
GOBPID	GO:0016477	0.000334232	1.65279	40.6485	63	777	cell migration	ATP1B1,BMP2,CD48,CMKLR1,VCAN,HBEGF,S1PR1,EDN1,EFNB2,CXCL3,HES1,HTR2B,ICAM1,IGF1,IL1B,IL8,IL10,IL16,ITGAV,LAMC1,MMP1,MMP10,MMP12,MPP1,SERPINE1,PIK3CG,PRKX,PTGS2,PTPRM,RAP2B,CCL3,CCL23,SGK1,SNAI1,SRC,SYK,TGFBR1,TIMP1,TLR2,TWIST1,VEGFA,VEGFB,WNT5A,ZP3,LRP8,PPAP2A,PPAP2B,MERTK,SEMA3C,PDPN,PLXND1,KANK1,CLIC4,GPR124,GREM1,EMR2,SBDS,ABI3,TNFRSF12A,TREM1,RAP2C,ARID5B,DNER
GOBPID	GO:0046649	0.000342518	1.89091	22.6523	40	433	lymphocyte activation	ATM,BCL6,CD80,CD38,CD40,CD48,CDKN1A,MAP3K8,DOCK2,FLT3,LRRC32,HHEX,HLX,HES1,ICAM1,IGF1,IL1B,IL2RA,IL10,IL18,IMPDH2,LYL1,MNDA,MSH2,PNP,PIK3CG,SLAMF1,SLC11A1,SRC,STAT5A,SYK,TNFAIP3,ZP3,VNN1,EBI3,SWAP70,BLNK,GIMAP5,PAG1,SAMSN1
GOBPID	GO:0006916	0.000362251	2.16543	13.968	28	267	anti-apoptosis	ADM,APEX1,CDKN1A,CLU,DUSP1,IGF1,IL1A,IL1B,IL10,IRAK1,MCL1,CITED1,SERPINB9,POLB,SNCA,SOD2,STAT5A,TGFBR1,TNFAIP3,VEGFA,VEGFB,BTG2,SOCS2,VNN1,NOL3,BAG3,TNFAIP8,SERBP1
GOBPID	GO:0072358	0.000385053	1.67848	36.8296	58	704	cardiovascular system development	ADM,ATM,BMP2,VCAN,DUSP6,S1PR1,EDN1,EFNB2,EPHB2,EREG,FZD2,HHEX,HES1,HTR2B,IGF1,IL1A,IL1B,IL8,IL18,ITGAV,ITGB8,JUNB,LYL1,MMP19,MYH11,NCL,NFATC3,SERPINE1,PCSK5,SERPINF1,PRKX,PTGS2,PTPRM,SOD2,SYK,TGFBR1,TNFAIP3,TWIST1,VEGFA,VEGFB,WNT5A,PPAP2B,SLC12A6,SEMA3C,PDPN,PLXND1,SIN3B,HEY1,GPR124,GREM1,HIPK2,TNFRSF12A,ERAP1,ADAP2,ARHGAP22,NAA15,SETDB2,SH3PXD2B
GOBPID	GO:0072359	0.000385053	1.67848	36.8296	58	704	circulatory system development	ADM,ATM,BMP2,VCAN,DUSP6,S1PR1,EDN1,EFNB2,EPHB2,EREG,FZD2,HHEX,HES1,HTR2B,IGF1,IL1A,IL1B,IL8,IL18,ITGAV,ITGB8,JUNB,LYL1,MMP19,MYH11,NCL,NFATC3,SERPINE1,PCSK5,SERPINF1,PRKX,PTGS2,PTPRM,SOD2,SYK,TGFBR1,TNFAIP3,TWIST1,VEGFA,VEGFB,WNT5A,PPAP2B,SLC12A6,SEMA3C,PDPN,PLXND1,SIN3B,HEY1,GPR124,GREM1,HIPK2,TNFRSF12A,ERAP1,ADAP2,ARHGAP22,NAA15,SETDB2,SH3PXD2B
GOBPID	GO:0040008	0.000390069	1.81891	25.8435	44	494	regulation of growth	PARP1,BCL6,CD36,CD38,CDKN1A,CISH,CYP27B1,HBEGF,DUSP6,ACSL4,FXN,HLX,IRF8,IGF1,IL10,MT1A,MT1E,MT1G,MT1M,MT2A,MT3,OSM,PHB,LGMN,RB1,SGK1,STAT5A,TGFBR1,TLR2,WNT5A,ZP3,CSDA,RUVBL1,URI1,SOCS2,MAD2L2,C6orf108,AFG3L2,ABTB2,GREM1,LRP12,CRIM1,TNFRSF12A,NOL8
GOBPID	GO:0032268	0.000414926	1.52205	60.9466	87	1165	regulation of cellular protein metabolic process	ADCY7,BMP2,CCNE1,CCNG1,CD80,CD36,CD40,CD44,CDKN1A,CDKN1C,CLU,PLK3,DDX1,DUSP1,DUSP4,DUSP5,DUSP6,EDN1,CLN8,EREG,FLT3,FNTA,HES1,HSP90AB1,HTR2B,IDE,IGF1,IL1B,IL8,IL10,IRAK1,IRAK2,ITGAV,MAP3K5,MT3,OSM,PEBP1,PIK3CG,PPP2R5B,RAP2B,RB1,SDC4,SLC11A1,SNCA,SSR1,SYK,TGFBR1,TIMP1,TNFAIP3,TWIST1,VEGFA,VEGFB,WNT5A,ZP3,LRP8,AKAP1,PPAP2B,CDC16,CCNA1,HERPUD1,SPRY2,MAD2L2,CAMKK2,METAP1,PPP1R15A,GREM1,NPTN,SERTAD1,AN…
GOBPID	GO:0042098	0.000422176	2.8814	6.17314	16	118	T cell proliferation	CD80,DOCK2,LRRC32,HES1,IGF1,IL1B,IL2RA,IL10,IL18,PNP,PIK3CG,SLC11A1,STAT5A,SYK,ZP3,EBI3
GOBPID	GO:0009893	0.000434722	1.41732	97.567	129	1865	positive regulation of metabolic process	ADCY7,ADM,ADORA3,APEX1,BMP2,CCNE1,CD80,CD36,CD38,CD40,CD44,CDKN1A,CDKN1C,CEBPA,CLU,PLK3,DBP,S1PR1,EDN1,EREG,ETS2,BPTF,FLT3,FNTA,FZD2,LRRC32,GTF2F2,HHEX,HES1,HSP90AB1,HTR2B,ICAM1,IRF8,IGF1,IL1A,IL1B,IL8,IL10,IL18,INSIG1,IRAK1,IRAK2,JUNB,LYL1,MAOB,MAP3K5,CITED1,MT3,MTF1,NDP,NFATC3,NFIL3,OSM,PEBP1,PHB,PIK3CG,PLAUR,PMAIP1,PPP2R5B,PTGS2,RAD51,RAP2B,RB1,CCL3,SDC4,SLC11A1,SNAI1,SNCA,SOD2,SSR1,SS18,STAT5…
GOBPID	GO:0033194	0.00043917	18.2061	0.418518	4	8	response to hydroperoxide	CD36,CD38,MGST1,TRPM2
GOBPID	GO:0045087	0.000451986	1.77987	27.5699	46	527	innate immune response	CD44,CLU,CYP27B1,DUSP4,DUSP6,EREG,HSP90AB1,ICAM1,IRF8,IL18,IRAK1,IRAK2,CD180,MAP3K5,CITED1,MT2A,PIK3CG,LGMN,PTPN1,PTPN2,PVRL2,S100A12,CCL3,SLC11A1,SNCA,STAT2,STAT5A,SYK,TLR2,TLR5,TNFAIP3,UBA7,WNT5A,VNN1,KYNU,TANK,TNIP1,POLR3G,PYCARD,TLR7,ERAP1,GIMAP5,POLR3B,CRTAM,TNIP3,CLEC4D
GOBPID	GO:0023057	0.000455016	1.72567	31.4935	51	602	negative regulation of signaling	ADM,AP2A2,BCL6,BMP2,CD38,CD44,CISH,DUSP1,DUSP4,DUSP5,DUSP6,EZH2,HHEX,HTR2B,IGF1,IL1B,IL8,IL10,MCL1,CITED1,PEBP1,PHB,PTGS2,PTPN1,RB1,RGS16,SKIL,SNAI1,SNCA,SRC,TNFAIP3,TWIST1,WNT5A,SOCS2,SPRY2,TNIP1,KANK1,HEY1,GREM1,HIPK2,INPP5K,DDIT4,PID1,PARL,SULF2,TWSG1,TNIP3,SNX25,GLIS2,CNKSR3,SPRED2
GOBPID	GO:0008152	0.000464762	1.30827	486.527	529	9300	metabolic process	ABL2,ACADM,ADCY7,ADH5,ADM,ADORA3,PARP1,AHCY,AK4,ALDH3A2,AMPD3,BIN1,AOX1,APEX1,AQP9,ARF4,RND3,ARHGAP5,ASCL2,ATIC,ATM,ATP1B1,ATP5D,ATR,BACH1,BCAT1,BCL6,BLMH,BMP2,ZFP36L2,C1QBP,CA12,CASP5,CAT,SERPINH1,CBR1,CBR3,CCNE1,CCNG1,CD80,CD36,CD38,CD40,CD44,CDK4,CDKN1A,CDKN1C,CEBPA,CHI3L2,CISH,CLU,CMKLR1,PLK3,MAP3K8,CSTA,CTSZ,CYP27B1,DBP,AKR1C1,DDX1,NQO1,DKC1,DNASE2,ARID3A,RCAN1,HBEGF,DUSP1,DUSP4,DUSP5,DUSP6,…
GOBPID	GO:0031399	0.000477558	1.57172	49.4374	73	945	regulation of protein modification process	ADCY7,BMP2,CCNE1,CCNG1,CD80,CD36,CD40,CD44,CDKN1A,CDKN1C,CLU,DUSP1,DUSP4,DUSP5,DUSP6,EDN1,EREG,FLT3,FNTA,HES1,HTR2B,IGF1,IL1B,IL8,IRAK1,IRAK2,MAP3K5,MT3,OSM,PEBP1,PIK3CG,PPP2R5B,RAP2B,RB1,SDC4,SLC11A1,SNCA,SSR1,SYK,TGFBR1,TNFAIP3,TWIST1,VEGFA,VEGFB,WNT5A,ZP3,LRP8,AKAP1,PPAP2B,CDC16,CCNA1,HERPUD1,SPRY2,MAD2L2,CAMKK2,GREM1,NPTN,SERTAD1,ANAPC5,ANAPC7,INPP5K,PID1,IMPACT,RAP2C,SRPRB,SAMSN1,FAM58A,FAM1…
GOBPID	GO:0050707	0.000481727	3.49002	3.9236	12	75	regulation of cytokine secretion	LRRC32,HTR2B,IL1A,IL10,CCL3,SYK,TLR2,TWIST1,WNT5A,CLEC4E,PYCARD,CRTAM
GOBPID	GO:0023052	0.00048823	1.30008	233.219	275	4458	signaling	ABL2,ADCY7,ADM,ADORA3,AP2A2,ARF4,RND3,ARHGAP5,ATM,ATR,BCL6,BMP2,CAT,CCNE1,CD80,CD36,CD38,CD40,CD44,CD48,CDK4,CDKN1A,CDKN1C,CEBPA,CISH,CLU,CMKLR1,PLK3,CYP27B1,NQO1,RCAN1,HBEGF,DUSP1,DUSP4,DUSP5,DUSP6,S1PR1,EDN1,EFNB2,EPHB2,CLN8,EREG,EZH2,FKBP4,FLT3,FNTA,FPR2,FXN,FYB,FZD2,GEM,GJB2,GNA15,NR3C1,CXCL1,HHEX,HES1,HSP90AB1,HTR2B,ICAM1,IRF8,IDE,IFI16,IGF1,IL1A,IL1B,IL2RA,IL3RA,IL8,IL10,IL18,INSIG1,IRAK1,I…
GOBPID	GO:0006915	0.000493781	1.45763	77.635	106	1484	apoptotic process	ATM,BCL6,BMP2,CASP5,CAT,CCNG1,CD38,CD40,CD44,CDKN1A,CLU,PLK3,NQO1,DNASE2,DUSP1,DUSP6,EDN1,CLN8,FLT3,FNTA,FXN,GAPDH,KAT2A,HTR2B,IFI16,IGF1,IL1A,IL1B,IL2RA,IL10,IL18,IRAK1,ITGAV,LTBR,MCL1,MAP3K5,MNDA,CITED1,MSH2,MT3,OSM,SERPINE1,PHB,SERPINB9,PIK3CG,PLAGL2,PLAUR,PLEC,PMAIP1,POLB,PPP3CC,LGMN,PTGS2,RB1,CCL3,SGK1,SKIL,SNAI1,SNCA,SOD2,SRC,STAT5A,TGFBR1,TIMP1,TLR2,TNFAIP3,TRAF5,TWIST1,VEGFA,VEGFB,WNT5A,B…
GOBPID	GO:0050920	0.000501807	3.09434	5.07453	14	97	regulation of chemotaxis	CMKLR1,S1PR1,EDN1,EFNB2,IL8,IL16,MPP1,SERPINE1,CCL3,VEGFA,VEGFB,WNT5A,GPR124,GREM1
GOBPID	GO:0032635	0.000501838	3.72983	3.40046	11	65	interleukin-6 production	CD36,EREG,IL1A,IL1B,IL10,TLR2,TNFAIP3,TWIST1,WNT5A,IL19,TLR7
GOBPID	GO:0070528	0.000521091	10.1243	0.732406	5	14	protein kinase C signaling cascade	CD40,HTR2B,VEGFA,WNT5A,ZP3
GOBPID	GO:0010648	0.000529994	1.71271	31.7027	51	606	negative regulation of cell communication	ADM,AP2A2,BCL6,BMP2,CD38,CD44,CISH,DUSP1,DUSP4,DUSP5,DUSP6,EZH2,HHEX,HTR2B,IGF1,IL1B,IL8,IL10,MCL1,CITED1,PEBP1,PHB,PTGS2,PTPN1,RB1,RGS16,SKIL,SNAI1,SNCA,SRC,TNFAIP3,TWIST1,WNT5A,SOCS2,SPRY2,TNIP1,KANK1,HEY1,GREM1,HIPK2,INPP5K,DDIT4,PID1,PARL,SULF2,TWSG1,TNIP3,SNX25,GLIS2,CNKSR3,SPRED2
GOBPID	GO:0045893	0.000535536	1.57422	47.9726	71	917	positive regulation of transcription, DNA-dependent	BMP2,CCNE1,CD80,CD38,CD40,CDKN1C,CEBPA,DBP,S1PR1,ETS2,BPTF,FZD2,GTF2F2,HHEX,HES1,IRF8,IGF1,IL1B,IL10,INSIG1,IRAK1,JUNB,LYL1,CITED1,MT3,MTF1,NDP,NFATC3,OSM,PHB,RB1,SLC11A1,SNAI1,SS18,STAT5A,SUPT5H,TGFBR1,TLR2,TWIST1,VEGFA,WNT5A,WNT6,ZP3,NCOA1,HMGN3,SRA1,TRIM28,TNIP1,MAD2L2,CAMKK2,GREM1,HIPK2,SERTAD1,INSIG2,INPP5K,TESC,PID1,CDK5RAP2,ARNTL2,TP53INP2,CSRNP1,NAA15,CSRNP2,EIF2A,GLIS2,C1orf85,PPARGC1B,N…
GOBPID	GO:0031325	0.000537685	1.41848	92.754	123	1773	positive regulation of cellular metabolic process	ADCY7,ADM,ADORA3,APEX1,BMP2,CCNE1,CD80,CD36,CD38,CD40,CD44,CDKN1A,CDKN1C,CEBPA,CLU,PLK3,DBP,S1PR1,EDN1,EREG,ETS2,BPTF,FLT3,FNTA,FZD2,GTF2F2,HHEX,HES1,HSP90AB1,HTR2B,ICAM1,IRF8,IGF1,IL1A,IL1B,IL8,IL10,IL18,INSIG1,IRAK1,IRAK2,JUNB,LYL1,MAOB,MAP3K5,CITED1,MT3,MTF1,NDP,NFATC3,OSM,PEBP1,PHB,PIK3CG,PMAIP1,PPP2R5B,PTGS2,RAD51,RAP2B,RB1,SDC4,SLC11A1,SNAI1,SNCA,SOD2,SSR1,SS18,STAT5A,SUPT5H,SYK,TGFBR1,TLR2…
GOBPID	GO:0009123	0.000537947	4.44741	2.40648	9	46	nucleoside monophosphate metabolic process	AK4,AMPD3,ATIC,IMPDH2,NT5E,PPAT,UPP1,C6orf108,PAICS
GOBPID	GO:0006144	0.000539263	5.04002	1.93564	8	37	purine nucleobase metabolic process	AMPD3,ATIC,CAT,IMPDH2,PNP,NT5E,PPAT,PAICS
GOBPID	GO:0035630	0.000548252	54.5578	0.209259	3	4	bone mineralization involved in bone maturation	BMP2,IGF1,GREM1
GOBPID	GO:0061043	0.000548252	54.5578	0.209259	3	4	regulation of vascular wound healing	SERPINE1,TNFAIP3,VEGFB
GOBPID	GO:0042102	0.000574271	3.66174	3.45277	11	66	positive regulation of T cell proliferation	CD80,HES1,IGF1,IL1B,IL2RA,IL18,PNP,STAT5A,SYK,ZP3,EBI3
GOBPID	GO:0009725	0.000575722	1.65525	36.6203	57	700	response to hormone stimulus	ADCY7,ADM,PARP1,CCNE1,CD38,CDKN1A,CEBPA,CISH,CYP27B1,AKR1C1,RCAN1,DUSP1,EDN1,EREG,FZD2,NR3C1,GSTM3,HHEX,ICAM1,IDE,IL1B,IL10,IL18,JUNB,LTA4H,MAOB,MMP19,CITED1,MT3,PEBP1,SERPINE1,SERPINF1,SERPINA1,SERPINB9,PPAT,PTGS2,PTPN1,PTPN2,SRC,STAT5A,TGFBR1,TIMP1,WNT5A,PRDM2,BTG2,NR4A3,AKAP1,NCOA1,URI1,SOCS2,ABCC5,KANK1,INSIG2,INPP5K,PID1,GNB4,PPARGC1B
GOBPID	GO:0010627	0.000577152	1.75714	27.8837	46	533	regulation of intracellular protein kinase cascade	CD36,CD40,CD44,HBEGF,DUSP1,DUSP4,DUSP5,DUSP6,EDN1,FLT3,HES1,HTR2B,IGF1,IL1A,IL1B,IL10,IRAK1,LTBR,MAP3K5,MT3,OSM,PEBP1,PIK3CG,S100A12,CCL3,SYK,TGFBR1,TIMP2,TNFAIP3,TRAF5,VEGFA,VEGFB,WNT5A,ZP3,SOCS2,SPRY2,TNIP1,TRAF3IP2,AKAP11,ATP2C1,HIPK2,INPP5K,TERF2IP,TNIP3,CNKSR3,SPRED2
GOBPID	GO:0046850	0.000591689	5.80841	1.51713	7	29	regulation of bone remodeling	CD38,SRC,SYK,TNFAIP3,VEGFA,GREM1,PPARGC1B
GOBPID	GO:0051222	0.00061464	2.58518	7.63795	18	146	positive regulation of protein transport	HTR2B,IGF1,IL1A,IL1B,IL10,CCL3,SYK,TGFBR1,TLR2,TWIST1,WIPF1,WNT5A,KANK1,CLEC4E,GREM1,PYCARD,TLR7,CRTAM
GOBPID	GO:0007088	0.000628417	3.17739	4.6037	13	88	regulation of mitosis	ATM,RCC1,EDN1,EREG,IGF1,IL1A,IL1B,PEBP1,RB1,CDC16,MAD2L2,ANAPC5,ANAPC7
GOBPID	GO:0050663	0.000628417	3.17739	4.6037	13	88	cytokine secretion	LRRC32,HTR2B,IL1A,IL10,PNP,CCL3,SYK,TLR2,TWIST1,WNT5A,CLEC4E,PYCARD,CRTAM
GOBPID	GO:0051783	0.000628417	3.17739	4.6037	13	88	regulation of nuclear division	ATM,RCC1,EDN1,EREG,IGF1,IL1A,IL1B,PEBP1,RB1,CDC16,MAD2L2,ANAPC5,ANAPC7
GOBPID	GO:0097285	0.00063246	2.18554	12.3463	25	236	cell-type specific apoptotic process	ATM,BCL6,CD40,NQO1,EDN1,GAPDH,IGF1,IL2RA,IL10,IL18,CITED1,MSH2,MT3,PMAIP1,LGMN,RB1,CCL3,SNCA,SOD2,STAT5A,TNFAIP3,VEGFB,WNT5A,NR4A3,HIPK2
GOBPID	GO:0050790	0.000639722	1.45965	72.979	100	1395	regulation of catalytic activity	ABL2,ADCY7,ADORA3,BIN1,ARHGAP5,BCL6,BMP2,SERPINH1,CCNE1,CCNG1,CD40,CD44,CDKN1A,CDKN1C,CSTA,CYP27B1,NQO1,RCAN1,DUSP1,DUSP4,DUSP5,DUSP6,S1PR1,EDN1,CLN8,EREG,FLT3,FNTA,FXN,GNA15,CXCL1,HTR2B,IL1B,IL8,IRAK1,IRAK2,MAP3K5,MSH2,MT3,OXA1L,SERPINE1,SERPINF1,SERPINA1,SERPINB9,PIK3CG,PMAIP1,PPP2R5B,RAP2B,RB1,RENBP,RGS16,SDC4,SGK1,SCG5,SLC11A1,SNCA,SOD2,SSR1,SYK,TFPI,TGFBR1,TNFAIP3,VEGFA,WNT5A,ZP3,LRP8,URI1,C…
GOBPID	GO:0033273	0.000649072	2.49607	8.31804	19	159	response to vitamin	ABL2,BMP2,CAT,CCNE1,CD38,CEBPA,CYP27B1,DUSP1,FZD2,IL1A,IL1B,SERPINF1,PTGS2,SOD2,WNT5A,WNT6,NCOA1,KYNU,TESC
GOBPID	GO:0034341	0.000655304	2.86754	5.80693	15	111	response to interferon-gamma	CD44,CYP27B1,HSP90AB1,ICAM1,IRF8,IL18,CITED1,MT2A,PTPN1,PTPN2,CCL3,SLC11A1,SNCA,WNT5A,KYNU
GOBPID	GO:0042089	0.000686132	2.98574	5.23147	14	100	cytokine biosynthetic process	CD80,EREG,IL1A,IL1B,IL10,IL18,PCSK5,STAT5A,SYK,TLR2,WNT5A,EBI3,IL19,TLR7
GOBPID	GO:0012501	0.00068905	1.44133	78.3674	106	1498	programmed cell death	ATM,BCL6,BMP2,CASP5,CAT,CCNG1,CD38,CD40,CD44,CDKN1A,CLU,PLK3,NQO1,DNASE2,DUSP1,DUSP6,EDN1,CLN8,FLT3,FNTA,FXN,GAPDH,KAT2A,HTR2B,IFI16,IGF1,IL1A,IL1B,IL2RA,IL10,IL18,IRAK1,ITGAV,LTBR,MCL1,MAP3K5,MNDA,CITED1,MSH2,MT3,OSM,SERPINE1,PHB,SERPINB9,PIK3CG,PLAGL2,PLAUR,PLEC,PMAIP1,POLB,PPP3CC,LGMN,PTGS2,RB1,CCL3,SGK1,SKIL,SNAI1,SNCA,SOD2,SRC,STAT5A,TGFBR1,TIMP1,TLR2,TNFAIP3,TRAF5,TWIST1,VEGFA,VEGFB,WNT5A,B…
GOBPID	GO:0019637	0.000699958	1.53406	52.6286	76	1006	organophosphate metabolic process	ADCY7,ADM,ADORA3,AMPD3,BIN1,ARF4,RND3,ARHGAP5,ATIC,ATM,ATP1B1,ATP5D,BCL6,CAT,CD40,S1PR1,EDN1,EIF2S3,CLN8,GEM,GK,GNA15,HTR2B,IMPDH2,MSH2,MTHFD1,PNP,NT5E,NTHL1,OXA1L,PFKFB3,PFKP,PIK3CG,PLAUR,PPAT,RAB13,RARRES3,RGS16,SNCA,TPI1,UPP1,ZP3,PPAP2B,RAB7L1,KYNU,PAPSS2,PAPSS1,RAB9A,ENTPD4,C16orf7,ACAP1,DNAJB6,ARL4C,NAMPT,SPRY2,C6orf108,PAICS,RASL10A,PMVK,SMPDL3A,MRAS,RHOBTB3,KIF1B,GPD1L,RASGRP3,ARFGAP3,ATP2…
GOBPID	GO:0010605	0.000725921	1.48117	64.6087	90	1235	negative regulation of macromolecule metabolic process	ASCL2,ATR,BACH1,BCL6,BMP2,CD36,CD38,CDKN1A,CDKN1C,CEBPA,PLK3,HBEGF,DUSP1,DUSP4,DUSP5,DUSP6,EDN1,CLN8,EREG,EZH2,BPTF,HHEX,HES1,HSP90AB1,IRF8,IDE,IFI16,IL1B,IL10,IRAK1,ITGAV,CITED1,MSH2,MT3,NAB2,NFIL3,PEBP1,SERPINE1,PHB,PLAUR,RB1,RFX5,CCL3,SRSF7,SKIL,SNAI1,SNCA,SUPT5H,TIMP1,TNFAIP3,TWIST1,VEGFB,WNT5A,ZNF189,ZP3,LRP8,AKAP1,CSDA,PPAP2B,URI1,CDC16,DNAJB6,TRIM28,SPRY2,MAD2L2,WWP1,ZHX2,SIN3B,HEY1,GREM1,…
GOBPID	GO:0009966	0.000733663	1.42126	85.5346	114	1635	regulation of signal transduction	ADM,AP2A2,ARHGAP5,ATM,ATR,BCL6,BMP2,CAT,CD80,CD36,CD40,CD44,CDKN1C,CISH,CLU,CMKLR1,CYP27B1,HBEGF,DUSP1,DUSP4,DUSP5,DUSP6,S1PR1,EDN1,EREG,EZH2,FLT3,HHEX,HES1,HSP90AB1,HTR2B,IGF1,IL1A,IL1B,IL8,IL10,IRAK1,IRAK2,LTBR,MCL1,MAP3K5,MFNG,CITED1,MT3,MYO5A,OSM,PEBP1,SERPINE1,PHB,PIK3CG,PMAIP1,PPP2R5B,PTPN1,PTPN2,RB1,RGS16,S100A12,CCL3,SKIL,SNAI1,SNCA,SRC,STAT2,SYK,TGFBR1,TIMP2,TLR2,TLR5,TNFAIP3,TRAF5,TWIST…
GOBPID	GO:0002694	0.000746506	1.97648	16.793	31	321	regulation of leukocyte activation	ATM,BCL6,CD80,CD38,CD40,CDKN1A,MAP3K8,FLT3,LRRC32,HLX,HES1,IGF1,IL1B,IL2RA,IL10,IL18,MNDA,PNP,PVRL2,SNCA,SRC,STAT5A,SYK,TNFAIP3,WNT5A,ZP3,VNN1,EBI3,GIMAP5,PAG1,SAMSN1
GOBPID	GO:0032604	0.000757823	14.5638	0.470832	4	9	granulocyte macrophage colony-stimulating factor production	CD80,IL1B,IL18,SYK
GOBPID	GO:0032645	0.000757823	14.5638	0.470832	4	9	regulation of granulocyte macrophage colony-stimulating factor production	CD80,IL1B,IL18,SYK
GOBPID	GO:0002688	0.000769119	3.81116	3.03425	10	58	regulation of leukocyte chemotaxis	CMKLR1,EDN1,IL8,MPP1,SERPINE1,CCL3,VEGFA,VEGFB,WNT5A,GREM1
GOBPID	GO:0071241	0.000781474	3.09441	4.70832	13	90	cellular response to inorganic substance	CEBPA,HTR2B,JUNB,MT1A,MT1E,MT1G,MT1M,MT2A,MT3,NFATC3,SNCA,WNT5A,CLIC4
GOBPID	GO:0009161	0.000783414	4.71416	2.04027	8	39	ribonucleoside monophosphate metabolic process	AK4,AMPD3,ATIC,IMPDH2,NT5E,PPAT,UPP1,PAICS
GOBPID	GO:0051270	0.000833362	1.84303	21.3967	37	409	regulation of cellular component movement	ABL2,BCL6,BMP2,CMKLR1,HBEGF,S1PR1,EDN1,ICAM1,IGF1,IL8,ITGAV,MMP10,MPP1,SERPINE1,PRKX,PTGS2,PTPRM,RAP2B,CCL3,SGK1,SNAI1,TGFBR1,TIMP1,TLR2,TWIST1,VEGFA,VEGFB,WNT5A,ZP3,PPAP2B,PDPN,PLXND1,KANK1,CLIC4,GREM1,ABI3,RAP2C
GOBPID	GO:0042107	0.000838492	2.91745	5.3361	14	102	cytokine metabolic process	CD80,EREG,IL1A,IL1B,IL10,IL18,PCSK5,STAT5A,SYK,TLR2,WNT5A,EBI3,IL19,TLR7
GOBPID	GO:0043627	0.000847997	2.5061	7.84721	18	150	response to estrogen stimulus	CCNE1,CD38,CYP27B1,RCAN1,DUSP1,GSTM3,IL1B,IL10,CITED1,SERPINE1,SERPINA1,SERPINB9,PTGS2,TGFBR1,WNT5A,PRDM2,NCOA1,SOCS2
GOBPID	GO:0072593	0.000869032	2.78003	5.96388	15	114	reactive oxygen species metabolic process	AOX1,CAT,CD36,CDKN1A,EDN1,IL18,MT3,PMAIP1,SOD2,SYK,FBLN5,IL19,DDIT4,PID1,SH3PXD2B
GOBPID	GO:0010466	0.00087781	2.67027	6.59165	16	126	negative regulation of peptidase activity	SERPINH1,CD44,CSTA,MT3,SERPINE1,SERPINF1,SERPINA1,SERPINB9,RENBP,SNCA,TFPI,TNFAIP3,VEGFA,DNAJB6,SPINT2,TNFAIP8
GOBPID	GO:0042108	0.00088348	3.73311	3.08657	10	59	positive regulation of cytokine biosynthetic process	CD80,EREG,IL1A,IL1B,STAT5A,SYK,TLR2,WNT5A,EBI3,TLR7
GOBPID	GO:0051781	0.00088348	3.73311	3.08657	10	59	positive regulation of cell division	CAT,EREG,HTR2B,IL1A,IL1B,OSM,PPBP,VEGFA,VEGFB,CSPP1
GOBPID	GO:0045088	0.00089671	2.20675	11.2477	23	215	regulation of innate immune response	DUSP4,DUSP6,EREG,HSP90AB1,IRAK1,IRAK2,PTPN1,PTPN2,PVRL2,STAT2,STAT5A,TLR2,TLR5,TNFAIP3,WNT5A,TNIP1,POLR3G,TLR7,ERAP1,GIMAP5,POLR3B,CRTAM,TNIP3
GOBPID	GO:0051249	0.00091179	2.02715	14.8051	28	283	regulation of lymphocyte activation	ATM,BCL6,CD80,CD38,CD40,CDKN1A,MAP3K8,FLT3,LRRC32,HLX,HES1,IGF1,IL1B,IL2RA,IL10,IL18,MNDA,PNP,SRC,STAT5A,SYK,TNFAIP3,ZP3,VNN1,EBI3,GIMAP5,PAG1,SAMSN1
GOBPID	GO:0034103	0.000935052	4.56651	2.09259	8	40	regulation of tissue remodeling	CD38,IL18,SRC,SYK,TNFAIP3,VEGFA,GREM1,PPARGC1B
GOBPID	GO:0048870	0.000960799	1.56604	43.9967	65	841	cell motility	ABL2,ATP1B1,BMP2,CD48,CMKLR1,VCAN,HBEGF,S1PR1,EDN1,EFNB2,CXCL3,HES1,HTR2B,ICAM1,IGF1,IL1B,IL8,IL10,IL16,ITGAV,LAMC1,MMP1,MMP10,MMP12,MPP1,SERPINE1,PIK3CG,PRKX,PTGS2,PTPRM,RAP2B,CCL3,CCL23,SGK1,SNAI1,SRC,SYK,TGFBR1,TIMP1,TLR2,TWIST1,VEGFA,VEGFB,WNT5A,ZP3,LRP8,PPAP2A,PPAP2B,DNAH11,MERTK,SEMA3C,PDPN,PLXND1,KANK1,CLIC4,GPR124,GREM1,EMR2,SBDS,ABI3,TNFRSF12A,TREM1,RAP2C,ARID5B,DNER
GOBPID	GO:0051674	0.000960799	1.56604	43.9967	65	841	localization of cell	ABL2,ATP1B1,BMP2,CD48,CMKLR1,VCAN,HBEGF,S1PR1,EDN1,EFNB2,CXCL3,HES1,HTR2B,ICAM1,IGF1,IL1B,IL8,IL10,IL16,ITGAV,LAMC1,MMP1,MMP10,MMP12,MPP1,SERPINE1,PIK3CG,PRKX,PTGS2,PTPRM,RAP2B,CCL3,CCL23,SGK1,SNAI1,SRC,SYK,TGFBR1,TIMP1,TLR2,TWIST1,VEGFA,VEGFB,WNT5A,ZP3,LRP8,PPAP2A,PPAP2B,DNAH11,MERTK,SEMA3C,PDPN,PLXND1,KANK1,CLIC4,GPR124,GREM1,EMR2,SBDS,ABI3,TNFRSF12A,TREM1,RAP2C,ARID5B,DNER
GOBPID	GO:0010563	0.000967973	2.23786	10.6199	22	203	negative regulation of phosphorus metabolic process	CDKN1A,CDKN1C,DUSP1,DUSP4,DUSP5,DUSP6,IL1B,PEBP1,RB1,TNFAIP3,TWIST1,AKAP1,PPAP2B,SPRY2,GREM1,INPP5K,PID1,IMPACT,SAMSN1,FAM129A,CNKSR3,SPRED2
GOBPID	GO:0045936	0.000967973	2.23786	10.6199	22	203	negative regulation of phosphate metabolic process	CDKN1A,CDKN1C,DUSP1,DUSP4,DUSP5,DUSP6,IL1B,PEBP1,RB1,TNFAIP3,TWIST1,AKAP1,PPAP2B,SPRY2,GREM1,INPP5K,PID1,IMPACT,SAMSN1,FAM129A,CNKSR3,SPRED2
GOBPID	GO:0050864	0.000979396	3.18513	4.23749	12	81	regulation of B cell activation	ATM,BCL6,CD38,CD40,CDKN1A,FLT3,IL10,MNDA,STAT5A,SYK,TNFAIP3,SAMSN1
GOBPID	GO:0010647	0.00102238	1.61051	37.5097	57	717	positive regulation of cell communication	ATM,ATR,BMP2,CAT,CD80,CD36,CD40,CD44,CDKN1C,CLU,CYP27B1,HBEGF,EDN1,EREG,FLT3,HHEX,HES1,HTR2B,IGF1,IL1A,IL1B,IRAK1,LTBR,MFNG,CITED1,MT3,OSM,PEBP1,PIK3CG,PMAIP1,PPP2R5B,PTGS2,S100A12,CCL3,SNCA,SUPT5H,SYK,TGFBR1,TLR2,TLR5,TRAF5,VEGFA,VEGFB,WNT5A,ZP3,SPRY2,TRAF3IP2,KANK1,NPTN,ATP2C1,HIPK2,TNFRSF12A,TERF2IP,SULF2,TWSG1,EIF2A,SPRED2
GOBPID	GO:2000145	0.00104585	1.8509	20.1412	35	385	regulation of cell motility	ABL2,BMP2,CMKLR1,HBEGF,S1PR1,EDN1,ICAM1,IGF1,IL8,ITGAV,MMP10,MPP1,SERPINE1,PRKX,PTGS2,PTPRM,RAP2B,CCL3,SGK1,SNAI1,TIMP1,TLR2,TWIST1,VEGFA,VEGFB,WNT5A,ZP3,PPAP2B,PDPN,PLXND1,KANK1,CLIC4,GREM1,ABI3,RAP2C
GOBPID	GO:0006753	0.00105185	1.55964	44.1536	65	844	nucleoside phosphate metabolic process	ADCY7,ADM,ADORA3,AK4,AMPD3,BIN1,ARF4,RND3,ARHGAP5,ATIC,ATP1B1,ATP5D,BCL6,CAT,CD40,S1PR1,EDN1,EIF2S3,FZD2,GALT,GEM,GNA15,HTR2B,IMPDH2,MSH2,MTHFD1,PNP,NT5E,NTHL1,OXA1L,PGD,PPAT,RAB13,RGS16,TIMP2,TPI1,UPP1,WNT5A,RAB7L1,KYNU,PAPSS2,PAPSS1,RAB9A,ENTPD4,C16orf7,ACAP1,DNAJB6,ARL4C,NAMPT,SPRY2,C6orf108,PAICS,RASL10A,HIBADH,MRAS,RHOBTB3,KIF1B,RASGRP3,ARFGAP3,ATP2C1,RASD1,GNL3L,PID1,ADAP2,AGAP4
GOBPID	GO:0051338	0.00109669	1.65062	32.749	51	626	regulation of transferase activity	ADCY7,CCNE1,CCNG1,CD40,CDKN1A,CDKN1C,DUSP1,DUSP4,DUSP5,DUSP6,EDN1,CLN8,EREG,FLT3,FXN,HTR2B,IL1B,IL8,IRAK1,IRAK2,MAP3K5,MT3,PIK3CG,PPP2R5B,RAP2B,RB1,SDC4,SLC11A1,SNCA,SSR1,SYK,TGFBR1,TNFAIP3,VEGFA,WNT5A,ZP3,LRP8,CCNA1,HERPUD1,SPRY2,NPRL2,CAMKK2,GREM1,SERTAD1,INPP5K,RAP2C,SRPRB,PIF1,FAM58A,CCNYL1,SPRED2
GOBPID	GO:0050865	0.00110473	1.90212	17.9439	32	343	regulation of cell activation	ATM,BCL6,CD80,CD38,CD40,CDKN1A,MAP3K8,FLT3,LRRC32,HLX,HES1,IGF1,IL1B,IL2RA,IL10,IL18,MNDA,PNP,PVRL2,SNCA,SRC,STAT5A,SYK,TNFAIP3,WNT5A,ZP3,VNN1,EBI3,PDPN,GIMAP5,PAG1,SAMSN1
GOBPID	GO:0010043	0.00110932	4.42781	2.1449	8	41	response to zinc ion	LTA4H,MT1A,MT1E,MT1G,MT1M,MT2A,SOD2,HVCN1
GOBPID	GO:0045429	0.00111286	5.11028	1.67407	7	32	positive regulation of nitric oxide biosynthetic process	EDN1,HSP90AB1,ICAM1,IL1B,PTGS2,SOD2,TLR2
GOBPID	GO:0045840	0.00111286	5.11028	1.67407	7	32	positive regulation of mitosis	EDN1,EREG,IGF1,IL1A,IL1B,PEBP1,RB1
GOBPID	GO:0051785	0.00111286	5.11028	1.67407	7	32	positive regulation of nuclear division	EDN1,EREG,IGF1,IL1A,IL1B,PEBP1,RB1
GOBPID	GO:0050731	0.00113904	2.69767	6.12082	15	117	positive regulation of peptidyl-tyrosine phosphorylation	CD80,CD36,CD40,CD44,EREG,FLT3,HES1,IGF1,OSM,SYK,VEGFA,VEGFB,LRP8,PPAP2B,GREM1
GOBPID	GO:0051272	0.00115184	2.16107	11.4569	23	219	positive regulation of cellular component movement	BCL6,BMP2,CMKLR1,HBEGF,S1PR1,EDN1,ICAM1,IGF1,IL8,ITGAV,SERPINE1,PTGS2,CCL3,SNAI1,TGFBR1,TLR2,TWIST1,VEGFA,VEGFB,WNT5A,ZP3,PPAP2B,PDPN
GOBPID	GO:0006732	0.00117439	2.20088	10.7768	22	206	coenzyme metabolic process	CBR3,ACSL1,ACSL4,IDH2,MTHFD1,PNP,PDK3,PGD,SHMT2,SNCA,TPI1,PDHX,VNN2,VNN1,KYNU,NAMPT,GPHN,PMVK,HIBADH,NNT,DHTKD1,DGAT2
GOBPID	GO:0036294	0.00117615	3.91652	2.66805	9	51	cellular response to decreased oxygen levels	BACH1,PLK3,ICAM1,MT3,PMAIP1,PTGS2,TWIST1,VEGFA,HIPK2
GOBPID	GO:0071456	0.00117615	3.91652	2.66805	9	51	cellular response to hypoxia	BACH1,PLK3,ICAM1,MT3,PMAIP1,PTGS2,TWIST1,VEGFA,HIPK2
GOBPID	GO:0006188	0.00121091	12.1356	0.523147	4	10	IMP biosynthetic process	AMPD3,ATIC,PPAT,PAICS
GOBPID	GO:0046040	0.00121091	12.1356	0.523147	4	10	IMP metabolic process	AMPD3,ATIC,PPAT,PAICS
GOBPID	GO:0046851	0.00121091	12.1356	0.523147	4	10	negative regulation of bone remodeling	CD38,TNFAIP3,VEGFA,GREM1
GOBPID	GO:0090303	0.00121091	12.1356	0.523147	4	10	positive regulation of wound healing	HBEGF,VEGFB,PPAP2B,KANK1
GOBPID	GO:0009967	0.00123699	1.61675	35.3647	54	676	positive regulation of signal transduction	ATM,ATR,BMP2,CAT,CD80,CD36,CD40,CD44,CDKN1C,CLU,CYP27B1,HBEGF,EDN1,EREG,FLT3,HHEX,HES1,HTR2B,IGF1,IL1A,IL1B,IRAK1,LTBR,MFNG,CITED1,MT3,OSM,PEBP1,PIK3CG,PMAIP1,PPP2R5B,S100A12,CCL3,SYK,TGFBR1,TLR2,TLR5,TRAF5,VEGFA,VEGFB,WNT5A,ZP3,SPRY2,TRAF3IP2,KANK1,NPTN,ATP2C1,HIPK2,TNFRSF12A,TERF2IP,SULF2,TWSG1,EIF2A,SPRED2
GOBPID	GO:0035239	0.00124012	2.03999	13.6541	26	261	tube morphogenesis	ADM,BMP2,CTSZ,EDN1,KAT2A,HHEX,HES1,IGF1,CITED1,NFATC3,PRKX,SRC,TWIST1,VEGFA,WNT5A,WNT6,NR4A3,HS2ST1,MTSS1,SPRY2,DEAF1,PDPN,PLXND1,GREM1,ENAH,SETDB2
GOBPID	GO:0018108	0.00126858	2.2332	10.1491	21	194	peptidyl-tyrosine phosphorylation	ABL2,CD80,CD36,CD40,CD44,EPHB2,EREG,FLT3,HES1,IGF1,OSM,PPP2R5B,SRC,STAT5A,SYK,VEGFA,VEGFB,LRP8,PPAP2B,GREM1,SAMSN1
GOBPID	GO:0009892	0.00130369	1.4377	69.317	94	1325	negative regulation of metabolic process	ASCL2,ATR,BACH1,BCL6,BMP2,CD36,CD38,CDKN1A,CDKN1C,CEBPA,PLK3,HBEGF,DUSP1,DUSP4,DUSP5,DUSP6,EDN1,CLN8,EREG,EZH2,BPTF,HHEX,HES1,HSP90AB1,HTR2B,IRF8,IDE,IFI16,IL1B,IL10,INSIG1,IRAK1,ITGAV,CITED1,MSH2,MT3,NAB2,NFIL3,PEBP1,SERPINE1,PHB,PLAUR,RB1,RFX5,CCL3,SRSF7,SKIL,SNAI1,SNCA,SUPT5H,TIMP1,TNFAIP3,TWIST1,VEGFB,WNT5A,ZNF189,ZP3,LRP8,AKAP1,CSDA,PPAP2B,URI1,CDC16,DNAJB6,TRIM28,SPRY2,MAD2L2,WWP1,ZHX2,SIN3…
GOBPID	GO:0080090	0.0013059	1.27607	219.46	257	4195	regulation of primary metabolic process	ADCY7,ADM,ADORA3,PARP1,BIN1,APEX1,ARHGAP5,ASCL2,ATR,BACH1,BCL6,BMP2,ZFP36L2,CAT,SERPINH1,CCNE1,CCNG1,CD80,CD36,CD38,CD40,CD44,CDKN1A,CDKN1C,CEBPA,CLU,CMKLR1,PLK3,DBP,DDX1,NQO1,ARID3A,RCAN1,DUSP1,DUSP4,DUSP5,DUSP6,S1PR1,EDN1,CLN8,EREG,ETS2,EZH2,ACSL1,BPTF,FLI1,FLT3,FNTA,FOSL2,FZD2,KAT2A,NR3C1,GTF2F2,HHEX,HES1,HSP90AB1,HTR2B,ICAM1,IRF8,IDE,IFI16,IGF1,IL1A,IL1B,IL8,IL10,IL16,INSIG1,IRAK1,IRAK2,ITGAV…
GOBPID	GO:0051092	0.00130602	2.90465	4.9699	13	95	positive regulation of NF-kappaB transcription factor activity	CAT,CD40,CLU,ICAM1,IL1B,IRAK1,IRAK2,TLR2,TRAF5,WNT5A,GREM1,PYCARD,TERF2IP
GOBPID	GO:0033135	0.00130855	4.29726	2.19722	8	42	regulation of peptidyl-serine phosphorylation	CD44,OSM,SNCA,VEGFA,SPRY2,MAD2L2,INPP5K,CNKSR3
GOBPID	GO:0032649	0.00131291	3.51696	3.24351	10	62	regulation of interferon-gamma production	IRF8,IL1B,IL10,IL18,SLC11A1,WNT5A,ZP3,EBI3,TLR7,GIMAP5
GOBPID	GO:0006828	0.0013172	27.2769	0.261574	3	5	manganese ion transport	SLC11A1,ZP3,ATP2C1
GOBPID	GO:0042253	0.0013172	27.2769	0.261574	3	5	granulocyte macrophage colony-stimulating factor biosynthetic process	CD80,IL18,SYK
GOBPID	GO:0007006	0.00134963	4.91337	1.72639	7	33	mitochondrial membrane organization	CLN8,PMAIP1,SNCA,SAMM50,TIMM9,GIMAP5,CHCHD6
GOBPID	GO:0046686	0.00134963	4.91337	1.72639	7	33	response to cadmium ion	MT1A,MT1E,MT1G,MT3,MTF1,SOD2,SLC30A1
GOBPID	GO:0051250	0.00135635	3.05175	4.39444	12	84	negative regulation of lymphocyte activation	ATM,BCL6,FLT3,LRRC32,HLX,IL2RA,IL10,MNDA,TNFAIP3,GIMAP5,PAG1,SAMSN1
GOBPID	GO:0031100	0.00135755	3.82516	2.72037	9	52	organ regeneration	ADM,ATIC,CCNE1,CDKN1A,CEBPA,PPAT,TGFBR1,NR4A3,CSDA
GOBPID	GO:0050793	0.00137574	1.44006	67.6952	92	1294	regulation of developmental process	ABL2,ADM,ASCL2,BCL6,BMP2,CCNE1,CD80,CD36,CD40,CD44,CEBPA,CLU,CYP27B1,RCAN1,DUSP6,EDN1,EPHB2,EREG,FKBP4,FLT3,FXN,HHEX,HLX,HES1,ICAM1,IGF1,IL1A,IL1B,IL2RA,IL10,IL18,INSIG1,ITGAV,JUNB,CITED1,MT3,NAB2,PNP,SERPINE1,SERPINF1,PMP22,PPP2R5B,PRKX,PTGS2,PTPRM,CCL3,SKIL,SNAI1,SOD2,STAT5A,SYK,TGFBR1,TIMP1,TIMP2,TNFAIP3,TTC3,TWIST1,VEGFA,VEGFB,WNT5A,WNT6,ZP3,LRP8,CSDA,NCOA1,VNN1,DEAF1,PDPN,PLXND1,KANK1,CYFIP1…
GOBPID	GO:0010604	0.00140187	1.38342	90.6614	118	1733	positive regulation of macromolecule metabolic process	ADCY7,APEX1,BMP2,CCNE1,CD80,CD36,CD38,CD40,CD44,CDKN1C,CEBPA,CLU,PLK3,DBP,S1PR1,EDN1,EREG,ETS2,BPTF,FLT3,FNTA,FZD2,LRRC32,GTF2F2,HHEX,HES1,HTR2B,IRF8,IGF1,IL1A,IL1B,IL8,IL10,IL18,INSIG1,IRAK1,IRAK2,JUNB,LYL1,MAP3K5,CITED1,MT3,MTF1,NDP,NFATC3,NFIL3,OSM,PHB,PIK3CG,PLAUR,PPP2R5B,RAD51,RAP2B,RB1,CCL3,SDC4,SLC11A1,SNAI1,SNCA,SSR1,SS18,STAT5A,SUPT5H,SYK,TGFBR1,TLR2,TNFAIP3,TWIST1,VEGFA,VEGFB,WNT5A,WNT6…
GOBPID	GO:0009117	0.00140668	1.55512	42.1657	62	806	nucleotide metabolic process	ADCY7,ADM,ADORA3,AK4,AMPD3,BIN1,ARF4,RND3,ARHGAP5,ATIC,ATP1B1,ATP5D,BCL6,CAT,CD40,S1PR1,EDN1,EIF2S3,FZD2,GALT,GEM,GNA15,HTR2B,IMPDH2,MSH2,MTHFD1,PNP,NT5E,NTHL1,OXA1L,PGD,PPAT,RAB13,RGS16,TIMP2,TPI1,UPP1,WNT5A,RAB7L1,KYNU,RAB9A,ENTPD4,C16orf7,ACAP1,DNAJB6,ARL4C,NAMPT,SPRY2,PAICS,RASL10A,HIBADH,MRAS,RHOBTB3,KIF1B,RASGRP3,ARFGAP3,ATP2C1,RASD1,GNL3L,PID1,ADAP2,AGAP4
GOBPID	GO:0010639	0.00143977	2.37866	8.21341	18	157	negative regulation of organelle organization	ATM,S1PR1,FKBP4,FXN,IGF1,SNCA,TWIST1,CDC16,MAD2L2,KANK1,SBDS,ANAPC5,ANAPC7,INPP5K,TERF2IP,PARL,CDK5RAP2,MID1IP1
GOBPID	GO:0002699	0.00144	2.86945	5.02221	13	96	positive regulation of immune effector process	CD80,CD36,CD40,HLX,IL1B,PVRL2,STAT5A,SYK,TLR2,WNT5A,ZP3,GIMAP5,CRTAM
GOBPID	GO:0007568	0.00144371	2.20735	10.2537	21	196	aging	ADH5,ADM,ATM,ATR,CAT,CDKN1A,EDN1,CLN8,ICAM1,IDE,IL1B,MSH2,PEBP1,SERPINE1,SERPINF1,SOD2,TGFBR1,TIMP1,TWIST1,SOCS2,TPRA1
GOBPID	GO:0018212	0.00144371	2.20735	10.2537	21	196	peptidyl-tyrosine modification	ABL2,CD80,CD36,CD40,CD44,EPHB2,EREG,FLT3,HES1,IGF1,OSM,PPP2R5B,SRC,STAT5A,SYK,VEGFA,VEGFB,LRP8,PPAP2B,GREM1,SAMSN1
GOBPID	GO:0051254	0.00146601	1.50364	50.6406	72	968	positive regulation of RNA metabolic process	BMP2,CCNE1,CD80,CD38,CD40,CDKN1C,CEBPA,DBP,S1PR1,ETS2,BPTF,FZD2,GTF2F2,HHEX,HES1,IRF8,IGF1,IL1B,IL10,INSIG1,IRAK1,JUNB,LYL1,CITED1,MT3,MTF1,NDP,NFATC3,OSM,PHB,RB1,SLC11A1,SNAI1,SS18,STAT5A,SUPT5H,TGFBR1,TLR2,TWIST1,VEGFA,WNT5A,WNT6,ZP3,BTG2,NCOA1,HMGN3,SRA1,TRIM28,TNIP1,MAD2L2,CAMKK2,GREM1,HIPK2,SERTAD1,INSIG2,INPP5K,TESC,PID1,CDK5RAP2,ARNTL2,TP53INP2,CSRNP1,NAA15,CSRNP2,EIF2A,GLIS2,C1orf85,PPARG…
GOBPID	GO:0009991	0.00146743	1.82767	19.775	34	378	response to extracellular stimulus	ABL2,ADM,BMP2,CAT,CCNE1,CD38,CDKN1A,CEBPA,CYP27B1,DUSP1,ACSL4,FZD2,ICAM1,IL1A,IL1B,LDHA,MT3,SERPINF1,PMAIP1,PTGS2,SLC2A1,SOD2,STAT5A,SUPT5H,WNT5A,WNT6,NCOA1,KYNU,CHSY1,TESC,TP53INP2,MAP1LC3A,ATG4C,EIF2AK4
GOBPID	GO:0032269	0.00146743	1.82767	19.775	34	378	negative regulation of cellular protein metabolic process	CDKN1A,DUSP1,DUSP4,DUSP5,DUSP6,EDN1,CLN8,HSP90AB1,IDE,IL1B,IL10,ITGAV,PEBP1,RB1,SNCA,TIMP1,TNFAIP3,TWIST1,AKAP1,PPAP2B,CDC16,SPRY2,MAD2L2,GREM1,ANAPC5,ANAPC7,INPP5K,PID1,IMPACT,SAMSN1,FAM129A,CNKSR3,SPRED2,EIF2AK4
GOBPID	GO:0009112	0.00148899	3.45035	3.29583	10	63	nucleobase metabolic process	AMPD3,ATIC,CAT,IMPDH2,ALDH6A1,PNP,NT5E,PPAT,UPP1,PAICS
GOBPID	GO:0032675	0.00148899	3.45035	3.29583	10	63	regulation of interleukin-6 production	CD36,EREG,IL1A,IL1B,IL10,TLR2,TNFAIP3,TWIST1,WNT5A,TLR7
GOBPID	GO:0048513	0.00149508	1.34185	116.086	146	2219	organ development	ADM,ALDH3A2,ARF4,ASCL2,ATIC,ATM,BCL6,BMP2,CCNE1,CCNG1,CD80,CD44,CDKN1A,CEBPA,CLU,VCAN,CSTA,CTSZ,CYP27B1,DNASE2,DOCK2,RCAN1,HBEGF,DUSP6,S1PR1,EDN1,EFNB2,EPHB2,CLN8,EREG,BPTF,FKBP4,FLI1,FLT3,FZD2,KAT2A,GJB2,HHEX,HLX,HES1,HSD11B1,HSP90AB1,HTR2B,ICAM1,IRF8,IFI16,IGF1,IL1A,IL2RA,IL8,IL10,IL18,INSIG1,ITGB8,JUNB,LTA4H,LYL1,MGST1,MMP19,CITED1,MSH2,MT1G,MYH11,MYO5A,NAB2,NAGLU,NDP,NFATC3,PNP,ODC1,PEBP1,PCS…
GOBPID	GO:0008219	0.00149584	1.38911	86.3716	113	1651	cell death	ATM,BCL6,BMP2,CASP5,CAT,CCNG1,CD38,CD40,CD44,CDKN1A,CLU,PLK3,NQO1,DNASE2,DUSP1,DUSP6,EDN1,CLN8,FLT3,FNTA,FOSL2,FXN,GAPDH,KAT2A,HTR2B,IFI16,IGF1,IL1A,IL1B,IL2RA,IL10,IL18,IRAK1,ITGAV,LTBR,MCL1,MAP3K5,MNDA,CITED1,MSH2,MT3,OSM,SERPINE1,PHB,SERPINB9,PIK3CG,PLAGL2,PLAUR,PLEC,PMAIP1,POLB,PPP3CC,LGMN,PTGS2,RB1,CCL3,SGK1,SKIL,SNAI1,SNCA,SOD2,SRC,STAT5A,TGFBR1,TIMP1,TLR2,TNFAIP3,TRAF5,TWIST1,VEGFA,VEGFB,W…
GOBPID	GO:0043901	0.00151164	5.75832	1.30787	6	25	negative regulation of multi-organism process	CD36,IRF8,IL2RA,IL10,ITGAV,TLR2
GOBPID	GO:0045124	0.00151164	5.75832	1.30787	6	25	regulation of bone resorption	CD38,SRC,SYK,TNFAIP3,VEGFA,PPARGC1B
GOBPID	GO:0051926	0.00151164	5.75832	1.30787	6	25	negative regulation of calcium ion transport	ICAM1,ITGAV,PTGS2,SLC30A1,NCS1,INPP5K
GOBPID	GO:0006801	0.00153522	4.17418	2.24953	8	43	superoxide metabolic process	CD36,EDN1,IL18,MT3,SOD2,SYK,FBLN5,SH3PXD2B
GOBPID	GO:0051384	0.00156882	2.50922	6.95786	16	133	response to glucocorticoid stimulus	ADM,CCNE1,CDKN1A,CEBPA,DUSP1,NR3C1,IL1B,IL10,JUNB,MAOB,PEBP1,SERPINE1,SERPINF1,PTGS2,WNT5A,PPARGC1B
GOBPID	GO:0048731	0.00156991	1.29562	166.152	200	3176	system development	ABL2,ADM,AP2A2,ALDH3A2,ARF4,ASCL2,ATIC,ATM,BCL6,BMP2,CAT,CCNE1,CCNG1,CD80,CD40,CD44,CDKN1A,CDKN1C,CEBPA,CLU,CMKLR1,VCAN,CSTA,CTSZ,CYP27B1,DNASE2,DOCK2,RCAN1,HBEGF,DUSP6,S1PR1,EDN1,EFNB2,EPHB2,CLN8,EREG,ETS2,ACSL4,BPTF,FKBP4,FLI1,FLT3,FXN,FZD2,KAT2A,GJB2,CXCL1,GSTM3,HHEX,HLX,HES1,HSD11B1,HSP90AB1,HTR2B,ICAM1,IRF8,IFI16,IGF1,IL1A,IL1B,IL2RA,IL8,IL10,IL18,INSIG1,ITGAV,ITGB8,JUNB,LAMC1,LTA4H,LYL1,MGS…
GOBPID	GO:0030334	0.00157302	1.83714	19.0949	33	365	regulation of cell migration	BMP2,CMKLR1,HBEGF,S1PR1,EDN1,ICAM1,IGF1,IL8,ITGAV,MMP10,MPP1,SERPINE1,PRKX,PTGS2,PTPRM,RAP2B,CCL3,SGK1,SNAI1,TIMP1,TLR2,VEGFA,VEGFB,WNT5A,ZP3,PPAP2B,PDPN,PLXND1,KANK1,CLIC4,GREM1,ABI3,RAP2C
GOBPID	GO:0055086	0.00158092	1.5209	46.5601	67	890	nucleobase-containing small molecule metabolic process	ADCY7,ADM,ADORA3,AK4,AMPD3,BIN1,ARF4,RND3,ARHGAP5,ATIC,ATP1B1,ATP5D,BCL6,CAT,CD40,S1PR1,EDN1,EIF2S3,FZD2,GALT,GEM,GNA15,HTR2B,IMPDH2,ALDH6A1,MSH2,MTHFD1,PNP,NT5E,NTHL1,OXA1L,PGD,PPAT,RAB13,RGS16,TIMP2,TPI1,UPP1,WNT5A,RAB7L1,KYNU,PAPSS2,PAPSS1,RAB9A,ENTPD4,C16orf7,ACAP1,DNAJB6,ARL4C,NAMPT,SPRY2,C6orf108,PAICS,RASL10A,HIBADH,MRAS,RHOBTB3,KIF1B,RASGRP3,ARFGAP3,ATP2C1,RASD1,GNL3L,PID1,ADAP2,QTRT1,AGA…
GOBPID	GO:0023056	0.00158614	1.58252	37.405	56	715	positive regulation of signaling	ATM,ATR,BMP2,CAT,CD80,CD36,CD40,CD44,CDKN1C,CLU,CYP27B1,HBEGF,EDN1,EREG,FLT3,HHEX,HES1,HTR2B,IGF1,IL1A,IL1B,IRAK1,LTBR,MFNG,CITED1,MT3,OSM,PEBP1,PIK3CG,PMAIP1,PPP2R5B,PTGS2,S100A12,CCL3,SNCA,SYK,TGFBR1,TLR2,TLR5,TRAF5,VEGFA,VEGFB,WNT5A,ZP3,SPRY2,TRAF3IP2,KANK1,NPTN,ATP2C1,HIPK2,TNFRSF12A,TERF2IP,SULF2,TWSG1,EIF2A,SPRED2
GOBPID	GO:0016265	0.00159239	1.38607	86.5285	113	1654	death	ATM,BCL6,BMP2,CASP5,CAT,CCNG1,CD38,CD40,CD44,CDKN1A,CLU,PLK3,NQO1,DNASE2,DUSP1,DUSP6,EDN1,CLN8,FLT3,FNTA,FOSL2,FXN,GAPDH,KAT2A,HTR2B,IFI16,IGF1,IL1A,IL1B,IL2RA,IL10,IL18,IRAK1,ITGAV,LTBR,MCL1,MAP3K5,MNDA,CITED1,MSH2,MT3,OSM,SERPINE1,PHB,SERPINB9,PIK3CG,PLAGL2,PLAUR,PLEC,PMAIP1,POLB,PPP3CC,LGMN,PTGS2,RB1,CCL3,SGK1,SKIL,SNAI1,SNCA,SOD2,SRC,STAT5A,TGFBR1,TIMP1,TLR2,TNFAIP3,TRAF5,TWIST1,VEGFA,VEGFB,W…
GOBPID	GO:0010646	0.00160012	1.41909	72.4036	97	1384	regulation of cell communication	ADM,AP2A2,ATM,ATR,BCL6,BMP2,CAT,CD80,CD36,CD38,CD40,CD44,CDKN1C,CISH,CLU,CYP27B1,HBEGF,DUSP1,DUSP4,DUSP5,DUSP6,EDN1,EREG,EZH2,FLT3,HHEX,HES1,HTR2B,IGF1,IL1A,IL1B,IL8,IL10,IRAK1,LTBR,MAOB,MCL1,MFNG,CITED1,MT3,OSM,PEBP1,PHB,PIK3CG,PMAIP1,PPP2R5B,PTGS2,PTPN1,RB1,RGS16,S100A12,CCL3,SCG5,SKIL,SLC2A1,SNAI1,SNCA,SRC,SUPT5H,SYK,TGFBR1,TLR2,TLR5,TNFAIP3,TRAF5,TWIST1,VEGFA,VEGFB,WNT5A,SLC30A1,ZP3,LRP8,SOCS…
GOBPID	GO:0002250	0.00163909	2.18208	10.3583	21	198	adaptive immune response	BCL6,CD80,CD40,CLU,HLX,ICAM1,IL1B,IL10,IL18,MSH2,PIK3CG,PVRL2,SLC11A1,SYK,TNFAIP3,VEGFA,ZP3,EBI3,SWAP70,GIMAP5,SAMSN1
GOBPID	GO:0042326	0.00163909	2.18208	10.3583	21	198	negative regulation of phosphorylation	CDKN1A,CDKN1C,DUSP1,DUSP4,DUSP5,DUSP6,IL1B,PEBP1,RB1,TNFAIP3,TWIST1,PPAP2B,SPRY2,GREM1,INPP5K,PID1,IMPACT,SAMSN1,FAM129A,CNKSR3,SPRED2
GOBPID	GO:0051240	0.0016725	1.73627	23.8032	39	455	positive regulation of multicellular organismal process	ADM,BMP2,CD36,CD38,CD40,EDN1,EREG,HTR2B,ICAM1,IRF8,IGF1,IL1A,IL1B,IL18,SERPINE1,PTGS2,PTPRM,CCL3,SLC11A1,SNCA,STAT5A,SYK,TLR2,TLR5,TWIST1,VEGFA,WNT5A,WNT6,ZP3,POLR3G,GREM1,NPTN,PYCARD,TLR7,INPP5K,GIMAP5,POLR3B,SULF2,PPARGC1B
GOBPID	GO:0046209	0.00168377	3.38621	3.34814	10	64	nitric oxide metabolic process	NQO1,EDN1,HSP90AB1,ICAM1,IL1B,IL10,PTGS2,SOD2,TLR2,GIMAP5
GOBPID	GO:0014070	0.00170258	2.13043	11.0907	22	212	response to organic cyclic compound	BMP2,CCNE1,CDKN1A,CEBPA,DUSP6,EDN1,FXN,HSP90AB1,ICAM1,IL1A,IL1B,IL18,JUNB,MSH2,PEBP1,SERPINA1,PTGS2,CCL3,SDC2,TGFBR1,WNT5A,BTG2
GOBPID	GO:0051223	0.00170623	2.02003	13.2356	25	253	regulation of protein transport	CD36,CD40,CDKN1A,LRRC32,HTR2B,IGF1,IL1A,IL1B,IL10,MXI1,CCL3,SYK,TGFBR1,TLR2,TWIST1,WIPF1,WNT5A,AKAP1,KANK1,CLEC4E,GREM1,PYCARD,TLR7,INPP5K,CRTAM
GOBPID	GO:0071345	0.00171644	1.776	21.5013	36	411	cellular response to cytokine stimulus	CD44,CEBPA,CMKLR1,EDN1,EREG,FLT3,HSP90AB1,ICAM1,IRF8,IL1A,IL1B,IL2RA,IL3RA,IL8,IL18,IRAK1,IRAK2,MT2A,MT3,PHB,PLP2,PTPN1,PTPN2,CCL3,STAT2,STAT5A,UBA7,WNT5A,LRP8,NUPL1,EBI3,ST3GAL6,PYCARD,INPP5K,PID1,EIF4E3
GOBPID	GO:0001933	0.00177501	2.21467	9.73054	20	186	negative regulation of protein phosphorylation	CDKN1A,DUSP1,DUSP4,DUSP5,DUSP6,IL1B,PEBP1,RB1,TNFAIP3,TWIST1,PPAP2B,SPRY2,GREM1,INPP5K,PID1,IMPACT,SAMSN1,FAM129A,CNKSR3,SPRED2
GOBPID	GO:0030593	0.00179191	4.05793	2.30185	8	44	neutrophil chemotaxis	EDN1,CXCL3,IL1B,IL8,MPP1,PIK3CG,CCL3,SYK
GOBPID	GO:0032623	0.00179191	4.05793	2.30185	8	44	interleukin-2 production	CD80,IL1A,IL1B,IL18,PNP,SLC11A1,STAT5A,TNFAIP3
GOBPID	GO:0002819	0.00184588	2.92903	4.55138	12	87	regulation of adaptive immune response	BCL6,CD80,CD40,HLX,IL1B,IL10,PVRL2,SLC11A1,TNFAIP3,ZP3,GIMAP5,SAMSN1
GOBPID	GO:0010951	0.00189394	2.54667	6.43471	15	123	negative regulation of endopeptidase activity	SERPINH1,CD44,MT3,SERPINE1,SERPINF1,SERPINA1,SERPINB9,RENBP,SNCA,TFPI,TNFAIP3,VEGFA,DNAJB6,SPINT2,TNFAIP8
GOBPID	GO:0019222	0.00190045	1.25672	246.821	284	4718	regulation of metabolic process	ABL2,ADCY7,ADM,ADORA3,PARP1,BIN1,APEX1,ARHGAP5,ASCL2,ATR,BACH1,BCL6,BMP2,ZFP36L2,CAT,SERPINH1,CCNE1,CCNG1,CD80,CD36,CD38,CD40,CD44,CDK4,CDKN1A,CDKN1C,CEBPA,CLU,CMKLR1,PLK3,CSTA,CYP27B1,DBP,DDX1,NQO1,ARID3A,RCAN1,HBEGF,DUSP1,DUSP4,DUSP5,DUSP6,S1PR1,EDN1,CLN8,EREG,ETS2,EZH2,ACSL1,BPTF,FLI1,FLT3,FNTA,FOSL2,FXN,FZD2,GAPDH,LRRC32,KAT2A,GNA15,NR3C1,CXCL1,GTF2F2,HHEX,HES1,HSP90AB1,HTR2B,ICAM1,IRF8,IDE,I…
GOBPID	GO:0031667	0.0019288	1.82981	18.5717	32	355	response to nutrient levels	ABL2,ADM,BMP2,CAT,CCNE1,CD38,CEBPA,CYP27B1,DUSP1,ACSL4,FZD2,ICAM1,IL1A,IL1B,MT3,SERPINF1,PMAIP1,PTGS2,SLC2A1,SOD2,STAT5A,SUPT5H,WNT5A,WNT6,NCOA1,KYNU,CHSY1,TESC,TP53INP2,MAP1LC3A,ATG4C,EIF2AK4
GOBPID	GO:0050918	0.00193981	4.56175	1.83102	7	35	positive chemotaxis	S1PR1,IL8,IL16,CCL3,CCL15,VEGFA,VEGFB
GOBPID	GO:0002697	0.00197415	2.14524	10.5153	21	201	regulation of immune effector process	AP2A2,AP1B1,BCL6,CD80,CD36,CD40,DOCK2,HLX,ICAM1,IL1B,IL2RA,IL10,PVRL2,STAT5A,SYK,TLR2,TNFAIP3,WNT5A,ZP3,GIMAP5,CRTAM
GOBPID	GO:0043408	0.00198186	1.91239	15.5898	28	298	regulation of MAPK cascade	CD36,CD44,DUSP1,DUSP4,DUSP5,DUSP6,EDN1,FLT3,IGF1,IL1A,IL1B,IRAK1,LTBR,MAP3K5,MT3,OSM,PEBP1,CCL3,SYK,TIMP2,VEGFA,VEGFB,WNT5A,SPRY2,TNIP1,HIPK2,CNKSR3,SPRED2
GOBPID	GO:0050727	0.00204418	2.23742	9.15508	19	175	regulation of inflammatory response	BCL6,IL1B,IL2RA,IL10,IL18,NT5E,OSM,SERPINE1,SERPINF1,PIK3CG,PTGS2,CCL3,STAT5A,TLR2,TNFAIP3,WNT5A,ZP3,TNIP1,TLR7
GOBPID	GO:0045935	0.00205748	1.45891	56.4476	78	1079	positive regulation of nucleobase-containing compound metabolic process	ADCY7,ADM,ADORA3,APEX1,BMP2,CCNE1,CD80,CD38,CD40,CDKN1C,CEBPA,DBP,S1PR1,EREG,ETS2,BPTF,FZD2,GTF2F2,HHEX,HES1,IRF8,IGF1,IL1B,IL10,INSIG1,IRAK1,JUNB,LYL1,CITED1,MT3,MTF1,NDP,NFATC3,OSM,PHB,RAD51,RB1,SLC11A1,SNAI1,SS18,STAT5A,SUPT5H,TGFBR1,TLR2,TWIST1,VEGFA,WNT5A,WNT6,ZP3,BTG2,NCOA1,HMGN3,SRA1,TRIM28,TNIP1,MAD2L2,CAMKK2,GREM1,HIPK2,SERTAD1,INSIG2,INPP5K,TESC,PID1,CDK5RAP2,ARNTL2,TP53INP2,CSRNP1,NAA1…
GOBPID	GO:0044237	0.00207677	1.25038	441.902	480	8447	cellular metabolic process	ABL2,ACADM,ADCY7,ADH5,ADM,ADORA3,PARP1,AHCY,AK4,ALDH3A2,AMPD3,BIN1,AOX1,APEX1,ARF4,RND3,ARHGAP5,ASCL2,ATIC,ATM,ATP1B1,ATP5D,ATR,BACH1,BCAT1,BCL6,BLMH,BMP2,ZFP36L2,CA12,CAT,CBR1,CBR3,CCNE1,CCNG1,CD80,CD36,CD38,CD40,CD44,CDK4,CDKN1A,CDKN1C,CEBPA,CISH,CLU,CMKLR1,PLK3,MAP3K8,CSTA,CYP27B1,DBP,AKR1C1,DDX1,NQO1,DKC1,DNASE2,ARID3A,RCAN1,HBEGF,DUSP1,DUSP4,DUSP5,DUSP6,ECHS1,S1PR1,EDN1,EIF2S3,EPHB2,CLN8,ERE…
GOBPID	GO:0050714	0.00212182	3.04899	4.02823	11	77	positive regulation of protein secretion	HTR2B,IL1A,IL10,CCL3,SYK,TLR2,TWIST1,WNT5A,CLEC4E,PYCARD,CRTAM
GOBPID	GO:0009653	0.00218515	1.34892	99.9211	127	1910	anatomical structure morphogenesis	ABL2,ADM,AP2A2,ATIC,ATM,BCL6,BMP2,CCNE1,CCNG1,CD36,CD44,CDKN1A,CEBPA,CLU,VCAN,CTSZ,DUSP1,DUSP4,DUSP5,DUSP6,S1PR1,EDN1,EFNB2,EPHB2,EREG,FLI1,FXN,FZD2,KAT2A,HHEX,HLX,HES1,HSP90AB1,HTR2B,ICAM1,IGF1,IL1A,IL1B,IL8,IL10,IL18,INSIG1,ITGAV,JUNB,LAMC1,MMP19,CITED1,MT3,MYH11,MYO5A,NAB2,NAGLU,NCL,NFATC3,SERPINE1,PCSK5,SERPINF1,PLAUR,PMP22,PPAT,PRKX,PTGS2,PTPRM,PVRL2,RB1,CCL3,SDC2,SKIL,SNAI1,SRC,SS18,STAT5A,…
GOBPID	GO:0009628	0.00222679	1.55522	37.9805	56	726	response to abiotic stimulus	ADM,AQP9,ASCL2,ATM,ATP1B1,ATR,BACH1,BMP2,CASP5,CAT,CD38,CD40,CDKN1A,PLK3,RCAN1,DUSP1,EDN1,HSP90AB1,HTR2B,ICAM1,IL1A,IL1B,IL18,JUNB,LTBR,MSH2,MT3,OSM,PEBP1,SERPINE1,SERPINA1,PMAIP1,PTGS2,SDC2,SLC2A1,SOD2,TGFBR1,TLR5,TWIST1,VEGFA,WNT5A,BTG2,CSDA,CRADD,PKD2L1,SLC12A6,PDPN,INTS7,MYOF,HIPK2,ERO1L,TLR7,DDIT4,LXN,HVCN1,BRAT1
GOBPID	GO:0044281	0.00223684	1.32176	120.01	149	2294	small molecule metabolic process	ACADM,ADCY7,ADH5,ADM,ADORA3,AHCY,AK4,ALDH3A2,AMPD3,BIN1,ARF4,RND3,ARHGAP5,ATIC,ATP1B1,ATP5D,BCAT1,BCL6,CA12,CAT,CBR1,CBR3,CD36,CD40,CEBPA,CYP27B1,AKR1C1,NQO1,ECHS1,S1PR1,EDN1,EIF2S3,CLN8,ACSL1,ACSL4,FZD2,SLC37A4,GALT,GAPDH,GBE1,GEM,GK,GNA15,GSTM3,HSD11B1,HTR2B,IDH2,IGF1,IMPDH2,IDO1,INSIG1,LDHA,LTA4H,MAOB,MGST1,ALDH6A1,MSH2,MT3,MTHFD1,MYO5A,NDUFV1,PNP,NT5E,NTHL1,ODC1,OXA1L,P4HA1,PDK3,PFKFB3,PFKP,P…
GOBPID	GO:0048585	0.00227179	1.56654	36.3587	54	695	negative regulation of response to stimulus	ADM,AP2A2,BCL6,BMP2,CD44,CISH,DUSP1,DUSP4,DUSP5,DUSP6,EZH2,HHEX,HTR2B,IGF1,IL1B,IL2RA,IL8,IL10,MCL1,CITED1,NT5E,PEBP1,SERPINE1,SERPINF1,PHB,PTPN1,RB1,RGS16,SKIL,SNAI1,SNCA,SRC,TNFAIP3,TWIST1,WNT5A,SOCS2,SPRY2,TNIP1,KANK1,HEY1,GREM1,HIPK2,INPP5K,DDIT4,PID1,PARL,SULF2,TWSG1,SAMSN1,TNIP3,SNX25,GLIS2,CNKSR3,SPRED2
GOBPID	GO:0040017	0.00228618	2.07504	11.3523	22	217	positive regulation of locomotion	BMP2,CMKLR1,HBEGF,S1PR1,EDN1,ICAM1,IGF1,IL8,IL16,ITGAV,SERPINE1,PTGS2,CCL3,SNAI1,TLR2,TWIST1,VEGFA,VEGFB,WNT5A,ZP3,PPAP2B,PDPN
GOBPID	GO:0042129	0.00229267	2.70542	5.28379	13	101	regulation of T cell proliferation	CD80,LRRC32,HES1,IGF1,IL1B,IL2RA,IL10,IL18,PNP,STAT5A,SYK,ZP3,EBI3
GOBPID	GO:0022617	0.00230118	4.40412	1.88333	7	36	extracellular matrix disassembly	LAMC1,MMP1,MMP10,TIMP1,TIMP2,TPSAB1,SH3PXD2B
GOBPID	GO:0031663	0.00230118	4.40412	1.88333	7	36	lipopolysaccharide-mediated signaling pathway	IL1B,IL18,IRAK1,IRAK2,CCL3,TLR2,TNFAIP3
GOBPID	GO:0051402	0.00230372	2.40549	7.21943	16	138	neuron apoptotic process	ATM,NQO1,GAPDH,IL18,CITED1,MSH2,MT3,PMAIP1,LGMN,RB1,CCL3,SNCA,SOD2,VEGFB,NR4A3,HIPK2
GOBPID	GO:0071453	0.00232066	3.49859	2.92962	9	56	cellular response to oxygen levels	BACH1,PLK3,ICAM1,MT3,PMAIP1,PTGS2,TWIST1,VEGFA,HIPK2
GOBPID	GO:0051186	0.00234457	1.99896	12.8171	24	245	cofactor metabolic process	CBR1,CBR3,ACSL1,ACSL4,FXN,IDH2,MTHFD1,PNP,PDK3,PGD,SHMT2,SNCA,TPI1,PDHX,VNN2,VNN1,KYNU,NAMPT,GPHN,PMVK,HIBADH,NNT,DHTKD1,DGAT2
GOBPID	GO:0032609	0.0023948	3.20728	3.50509	10	67	interferon-gamma production	IRF8,IL1B,IL10,IL18,SLC11A1,WNT5A,ZP3,EBI3,TLR7,GIMAP5
GOBPID	GO:0070373	0.00243324	6.50609	0.99398	5	19	negative regulation of ERK1 and ERK2 cascade	DUSP6,IGF1,SPRY2,TNIP1,CNKSR3
GOBPID	GO:0006928	0.00244525	1.44798	56.8138	78	1086	cellular component movement	ABL2,ATP1B1,BCL6,BMP2,CD48,CMKLR1,VCAN,HBEGF,S1PR1,EDN1,EFNB2,FPR2,CXCL3,HES1,HTR2B,ICAM1,IGF1,IL1B,IL8,IL10,IL16,ITGAV,LAMC1,LSP1,MMP1,MMP10,MMP12,MPP1,MYO5A,SERPINE1,PIK3CG,PLAUR,PRKX,PTGS2,PTPRM,RAP2B,CCL3,CCL23,SGK1,SNAI1,SRC,SYK,TGFBR1,TIMP1,TLR2,TWIST1,VEGFA,VEGFB,WIPF1,WNT5A,ZP3,LRP8,PPAP2A,PPAP2B,DNAH11,VNN2,VNN1,MTSS1,LRPPRC,TUBB3,MERTK,SEMA3C,PDPN,SPINT2,KIF1B,PLXND1,KANK1,CLIC4,GPR124,…
GOBPID	GO:0035295	0.00245704	1.76447	20.4027	34	390	tube development	ADM,BMP2,CEBPA,CTSZ,EDN1,KAT2A,HHEX,HES1,HSD11B1,IGF1,IL18,LTA4H,CITED1,NFATC3,PCSK5,PRKX,SDC4,SRC,TGFBR1,TWIST1,VEGFA,WNT5A,WNT6,NR4A3,HS2ST1,MTSS1,SPRY2,DEAF1,PDPN,PLXND1,GREM1,ENAH,TSHZ3,SETDB2
GOBPID	GO:0070201	0.00246271	1.93119	14.3342	26	274	regulation of establishment of protein localization	CD36,CD40,CDKN1A,LRRC32,HTR2B,IGF1,IL1A,IL1B,IL10,MXI1,CCL3,SYK,TGFBR1,TLR2,TWIST1,WIPF1,WNT5A,AKAP1,KANK1,CLEC4E,GREM1,PYCARD,TLR7,INPP5K,PID1,CRTAM
GOBPID	GO:0018193	0.00246448	1.59588	32.3828	49	619	peptidyl-amino acid modification	ABL2,ADH5,ATM,ATR,CD80,CD36,CD40,CD44,EPHB2,EREG,FKBP4,FLT3,GALNT2,GAPDH,KAT2A,HES1,IGF1,IL1B,OSM,P4HA1,PDK3,PPP2R5B,PRKX,SNCA,SRC,STAT5A,SYK,TGFBR1,TWIST1,VEGFA,VEGFB,LRP8,RUVBL1,PPAP2B,NCOA1,P4HA2,SPRY2,MAD2L2,METAP1,GREM1,HIPK2,DPH5,INPP5K,ZDHHC7,SAMSN1,ALG8,TADA1,CNKSR3,SPRED2
GOBPID	GO:0006163	0.00247621	1.56608	35.6786	53	682	purine nucleotide metabolic process	ADCY7,ADM,ADORA3,AK4,AMPD3,BIN1,ARF4,RND3,ARHGAP5,ATIC,ATP1B1,ATP5D,BCL6,CAT,CD40,S1PR1,EDN1,EIF2S3,FZD2,GEM,GNA15,HTR2B,IMPDH2,MSH2,MTHFD1,PNP,NT5E,OXA1L,PPAT,RAB13,RGS16,TIMP2,WNT5A,RAB7L1,RAB9A,C16orf7,ACAP1,DNAJB6,ARL4C,SPRY2,PAICS,RASL10A,MRAS,RHOBTB3,KIF1B,RASGRP3,ARFGAP3,ATP2C1,RASD1,GNL3L,PID1,ADAP2,AGAP4
GOBPID	GO:0010741	0.00247713	2.56509	5.96388	14	114	negative regulation of intracellular protein kinase cascade	DUSP1,DUSP4,DUSP5,DUSP6,IGF1,IL10,PEBP1,TNFAIP3,SPRY2,TNIP1,INPP5K,TNIP3,CNKSR3,SPRED2
GOBPID	GO:0018209	0.00247713	2.56509	5.96388	14	114	peptidyl-serine modification	ATM,ATR,CD44,GALNT2,OSM,PRKX,SNCA,TGFBR1,VEGFA,SPRY2,MAD2L2,HIPK2,INPP5K,CNKSR3
GOBPID	GO:0006357	0.00250421	1.45328	55.1397	76	1054	regulation of transcription from RNA polymerase II promoter	ASCL2,BACH1,BCL6,BMP2,CCNE1,CD36,CD40,CDKN1C,CEBPA,PLK3,DBP,S1PR1,EDN1,ETS2,BPTF,FOSL2,KAT2A,GTF2F2,HHEX,HES1,IRF8,IGF1,IL1B,INSIG1,JUNB,CITED1,MT3,MTF1,NFATC3,NFIL3,OSM,PHB,RB1,RFX5,SKIL,SLC11A1,HLTF,SNAI1,SOD2,SS18,STAT2,STAT5A,SUPT5H,TLR2,TWIST1,VEGFA,WNT5A,ZNF189,LRP8,CSDA,RUVBL1,NCOA1,URI1,CCNA1,HMGN3,SRA1,TRIM28,TNIP1,DEAF1,ZHX2,HEY1,GREM1,HIPK2,INSIG2,PID1,ELP2,ARNTL2,CSRNP1,CSRNP2,EIF2A,G…
GOBPID	GO:0018105	0.00250508	2.67482	5.3361	13	102	peptidyl-serine phosphorylation	ATM,ATR,CD44,OSM,PRKX,SNCA,TGFBR1,VEGFA,SPRY2,MAD2L2,HIPK2,INPP5K,CNKSR3
GOBPID	GO:0006189	0.00253197	18.1833	0.313888	3	6	'de novo' IMP biosynthetic process	ATIC,PPAT,PAICS
GOBPID	GO:0009125	0.00253197	18.1833	0.313888	3	6	nucleoside monophosphate catabolic process	AMPD3,NT5E,C6orf108
GOBPID	GO:0010801	0.00253197	18.1833	0.313888	3	6	negative regulation of peptidyl-threonine phosphorylation	SPRY2,INPP5K,SPRED2
GOBPID	GO:0042492	0.00253197	18.1833	0.313888	3	6	gamma-delta T cell differentiation	STAT5A,SYK,GIMAP5
GOBPID	GO:0045586	0.00253197	18.1833	0.313888	3	6	regulation of gamma-delta T cell differentiation	STAT5A,SYK,GIMAP5
GOBPID	GO:0045588	0.00253197	18.1833	0.313888	3	6	positive regulation of gamma-delta T cell differentiation	STAT5A,SYK,GIMAP5
GOBPID	GO:0060907	0.00253197	18.1833	0.313888	3	6	positive regulation of macrophage cytokine production	CD36,TLR2,WNT5A
GOBPID	GO:0061041	0.00261121	2.95888	4.13286	11	79	regulation of wound healing	CD36,HBEGF,EDN1,SERPINE1,PLAUR,SYK,TNFAIP3,VEGFB,PPAP2B,PDPN,KANK1
GOBPID	GO:0034104	0.0026242	9.1004	0.627777	4	12	negative regulation of tissue remodeling	CD38,TNFAIP3,VEGFA,GREM1
GOBPID	GO:0043517	0.0026242	9.1004	0.627777	4	12	positive regulation of DNA damage response, signal transduction by p53 class mediator	ATM,ATR,PMAIP1,SPRED2
GOBPID	GO:0050930	0.0026242	9.1004	0.627777	4	12	induction of positive chemotaxis	IL8,IL16,VEGFA,VEGFB
GOBPID	GO:0071276	0.0026242	9.1004	0.627777	4	12	cellular response to cadmium ion	MT1A,MT1E,MT1G,MT3
GOBPID	GO:0090322	0.0026242	9.1004	0.627777	4	12	regulation of superoxide metabolic process	CD36,IL18,SYK,FBLN5
GOBPID	GO:0030183	0.00267917	3.15175	3.5574	10	68	B cell differentiation	ATM,BCL6,FLT3,HHEX,IL10,LYL1,MSH2,STAT5A,SYK,BLNK
GOBPID	GO:0070555	0.00267917	3.15175	3.5574	10	68	response to interleukin-1	CD38,EDN1,ICAM1,IL8,IRAK1,IRAK2,CITED1,CCL3,SNCA,SRC
GOBPID	GO:0042113	0.00269422	2.29347	8.00415	17	153	B cell activation	ATM,BCL6,CD38,CD40,CDKN1A,FLT3,HHEX,IL10,LYL1,MNDA,MSH2,STAT5A,SYK,TNFAIP3,SWAP70,BLNK,SAMSN1
GOBPID	GO:0050730	0.00269422	2.29347	8.00415	17	153	regulation of peptidyl-tyrosine phosphorylation	CD80,CD36,CD40,CD44,EREG,FLT3,HES1,IGF1,OSM,PPP2R5B,SYK,VEGFA,VEGFB,LRP8,PPAP2B,GREM1,SAMSN1
GOBPID	GO:0051145	0.0027123	4.25701	1.93564	7	37	smooth muscle cell differentiation	ADM,RCAN1,EREG,HES1,NFATC3,HEY1,TSHZ3
GOBPID	GO:0006196	0.0027334	Inf	0.104629	2	2	AMP catabolic process	AMPD3,NT5E
GOBPID	GO:0032252	0.0027334	Inf	0.104629	2	2	secretory granule localization	MYO5A,PIK3CG
GOBPID	GO:0033866	0.0027334	Inf	0.104629	2	2	nucleoside bisphosphate biosynthetic process	PAPSS2,PAPSS1
GOBPID	GO:0034030	0.0027334	Inf	0.104629	2	2	ribonucleoside bisphosphate biosynthetic process	PAPSS2,PAPSS1
GOBPID	GO:0034033	0.0027334	Inf	0.104629	2	2	purine nucleoside bisphosphate biosynthetic process	PAPSS2,PAPSS1
GOBPID	GO:0034036	0.0027334	Inf	0.104629	2	2	purine ribonucleoside bisphosphate biosynthetic process	PAPSS2,PAPSS1
GOBPID	GO:0046687	0.0027334	Inf	0.104629	2	2	response to chromate	MT1A,SERPINA1
GOBPID	GO:0050428	0.0027334	Inf	0.104629	2	2	3'-phosphoadenosine 5'-phosphosulfate biosynthetic process	PAPSS2,PAPSS1
GOBPID	GO:0055073	0.0027334	Inf	0.104629	2	2	cadmium ion homeostasis	MT3,SLC11A1
GOBPID	GO:0090291	0.0027334	Inf	0.104629	2	2	negative regulation of osteoclast proliferation	TNFAIP3,GREM1
GOBPID	GO:1900084	0.0027334	Inf	0.104629	2	2	regulation of peptidyl-tyrosine autophosphorylation	VEGFA,GREM1
GOBPID	GO:1900086	0.0027334	Inf	0.104629	2	2	positive regulation of peptidyl-tyrosine autophosphorylation	VEGFA,GREM1
GOBPID	GO:0009259	0.00273688	1.63913	27.6745	43	529	ribonucleotide metabolic process	AK4,AMPD3,BIN1,ARF4,RND3,ARHGAP5,ATIC,ATP1B1,ATP5D,BCL6,CD40,S1PR1,EIF2S3,GEM,GNA15,HTR2B,IMPDH2,MSH2,NT5E,PPAT,RAB13,RGS16,UPP1,RAB7L1,RAB9A,ENTPD4,C16orf7,ACAP1,ARL4C,SPRY2,PAICS,RASL10A,MRAS,RHOBTB3,KIF1B,RASGRP3,ARFGAP3,ATP2C1,RASD1,GNL3L,PID1,ADAP2,AGAP4
GOBPID	GO:0045859	0.00288427	1.60617	30.1856	46	577	regulation of protein kinase activity	ADCY7,CCNE1,CCNG1,CD40,CDKN1A,CDKN1C,DUSP1,DUSP4,DUSP5,DUSP6,EDN1,EREG,FLT3,HTR2B,IL1B,IL8,IRAK1,IRAK2,MAP3K5,MT3,PIK3CG,PPP2R5B,RAP2B,RB1,SDC4,SLC11A1,SNCA,SSR1,SYK,TGFBR1,TNFAIP3,VEGFA,WNT5A,ZP3,LRP8,CCNA1,HERPUD1,SPRY2,CAMKK2,SERTAD1,INPP5K,RAP2C,SRPRB,FAM58A,CCNYL1,SPRED2
GOBPID	GO:0002822	0.00288799	2.91579	4.18518	11	80	regulation of adaptive immune response based on somatic recombination of immune receptors built from immunoglobulin superfamily domains	BCL6,CD80,CD40,HLX,IL1B,IL10,PVRL2,SLC11A1,TNFAIP3,ZP3,GIMAP5
GOBPID	GO:0044403	0.00297832	2.61565	5.44073	13	104	symbiosis, encompassing mutualism through parasitism	CD36,ICAM1,IRF8,IL10,ITGAV,PVRL2,CCL3,TLR2,TNIP1,WWP1,HIPK2,TLR7,INPP5K
GOBPID	GO:0051591	0.00298992	3.0981	3.60972	10	69	response to cAMP	AQP9,DUSP1,IL18,JUNB,MMP19,CITED1,PEBP1,SLC8A3,INPP5K,PPARGC1B
GOBPID	GO:0050795	0.00302631	2.41157	6.7486	15	129	regulation of behavior	CMKLR1,S1PR1,EDN1,EFNB2,HTR2B,IL8,IL16,MPP1,SERPINE1,CCL3,VEGFA,VEGFB,WNT5A,GPR124,GREM1
GOBPID	GO:0042493	0.00302978	1.80805	17.5777	30	336	response to drug	BLMH,CCNE1,CD38,CDK4,CDKN1A,DUSP6,EDN1,FXN,HTR2B,ICAM1,IL1B,IL10,JUNB,MAOB,MGST1,MSH2,MT2A,MT3,PNP,PEBP1,PTGS2,PTPRM,SLC22A1,SNCA,SOD2,SS18,TLR2,BCAR3,NCOA1,SEMA3C
GOBPID	GO:0032940	0.00303366	1.56248	34.3708	51	657	secretion by cell	ADM,CD36,CD38,CD40,CLU,EDN1,F5,LRRC32,HTR2B,IGF1,IL1A,IL1B,IL10,LTBP2,MAOB,MYO5A,PNP,OSM,SERPINE1,PCSK5,SERPINA1,PIK3CG,PPBP,CCL3,SCG5,SLC2A1,SNCA,SYK,SYT1,TIMP1,TLR2,TWIST1,VEGFA,VEGFB,WNT5A,SLC30A1,ZP3,LIN7A,HMGN3,RAB9A,RIMS3,MERTK,NCS1,CLEC4E,ARFGAP3,PYCARD,SLC38A2,ARHGAP17,TRIM36,CRTAM,STXBP5
GOBPID	GO:0030155	0.00305103	1.95401	13.0787	24	250	regulation of cell adhesion	ABL2,BCL6,CD36,CD44,S1PR1,ICAM1,IL1B,IL8,IL18,ITGAV,SERPINE1,PIK3CG,PRKX,SDC4,SRC,STAT5A,SYK,VEGFA,WNT5A,PPAP2B,CYTIP,KANK1,TESC,PLEKHA2
GOBPID	GO:0031960	0.00308045	2.32844	7.42869	16	142	response to corticosteroid stimulus	ADM,CCNE1,CDKN1A,CEBPA,DUSP1,NR3C1,IL1B,IL10,JUNB,MAOB,PEBP1,SERPINE1,SERPINF1,PTGS2,WNT5A,PPARGC1B
GOBPID	GO:0070997	0.00308045	2.32844	7.42869	16	142	neuron death	ATM,NQO1,GAPDH,IL18,CITED1,MSH2,MT3,PMAIP1,LGMN,RB1,CCL3,SNCA,SOD2,VEGFB,NR4A3,HIPK2
GOBPID	GO:0009306	0.00308776	2.2599	8.10878	17	155	protein secretion	CD40,LRRC32,HTR2B,IL1A,IL10,LTBP2,PNP,PCSK5,CCL3,SYK,TLR2,TWIST1,WNT5A,CLEC4E,ARFGAP3,PYCARD,CRTAM
GOBPID	GO:0009127	0.00310636	6.0719	1.04629	5	20	purine nucleoside monophosphate biosynthetic process	AMPD3,ATIC,IMPDH2,PPAT,PAICS
GOBPID	GO:0009168	0.00310636	6.0719	1.04629	5	20	purine ribonucleoside monophosphate biosynthetic process	AMPD3,ATIC,IMPDH2,PPAT,PAICS
GOBPID	GO:0050927	0.00310636	6.0719	1.04629	5	20	positive regulation of positive chemotaxis	S1PR1,IL8,IL16,VEGFA,VEGFB
GOBPID	GO:0032677	0.00317749	4.11939	1.98796	7	38	regulation of interleukin-8 production	IL1B,IL18,SERPINE1,TLR2,TLR5,WNT5A,TLR7
GOBPID	GO:0044092	0.00322555	1.5571	34.4754	51	659	negative regulation of molecular function	CAT,SERPINH1,CD44,CDKN1A,CDKN1C,CMKLR1,CSTA,CYP27B1,NQO1,DUSP1,DUSP4,DUSP5,DUSP6,CLN8,IL1B,IRAK1,IRAK2,ITGAV,MT3,OXA1L,SERPINE1,SERPINF1,SERPINA1,SERPINB9,RB1,RENBP,CCL23,SCG5,SNCA,TFPI,TNFAIP3,TWIST1,VEGFA,URI1,CDC16,DNAJB6,SPRY2,MAD2L2,NPRL2,SPINT2,NCS1,HEY1,TNFAIP8,ANAPC5,ANAPC7,INPP5K,PIF1,CSRNP2,GLIS2,WDR81,SPRED2
GOBPID	GO:0001890	0.00324092	2.58703	5.49305	13	105	placenta development	ADM,ASCL2,CEBPA,CYP27B1,HSP90AB1,IL10,ITGB8,JUNB,CITED1,NDP,PTGS2,SNAI1,DNAJB6
GOBPID	GO:0031323	0.00331643	1.24554	223.959	258	4281	regulation of cellular metabolic process	ABL2,ADCY7,ADM,ADORA3,PARP1,BIN1,APEX1,ARHGAP5,ASCL2,ATR,BACH1,BCL6,BMP2,ZFP36L2,CAT,CCNE1,CCNG1,CD80,CD36,CD38,CD40,CD44,CDKN1A,CDKN1C,CEBPA,CLU,CMKLR1,PLK3,DBP,DDX1,NQO1,ARID3A,RCAN1,HBEGF,DUSP1,DUSP4,DUSP5,DUSP6,S1PR1,EDN1,CLN8,EREG,ETS2,EZH2,ACSL1,BPTF,FLI1,FLT3,FNTA,FOSL2,FZD2,KAT2A,NR3C1,GTF2F2,HHEX,HES1,HSP90AB1,HTR2B,ICAM1,IRF8,IDE,IFI16,IGF1,IL1A,IL1B,IL8,IL10,IL16,IL18,INSIG1,IRAK1,IRAK…
GOBPID	GO:0045598	0.00334864	3.28795	3.08657	9	59	regulation of fat cell differentiation	BMP2,CEBPA,HES1,INSIG1,PTGS2,SOD2,WNT5A,DLK2,SH3PXD2B
GOBPID	GO:0043086	0.00335065	1.63879	26.3666	41	504	negative regulation of catalytic activity	SERPINH1,CD44,CDKN1A,CDKN1C,CSTA,CYP27B1,NQO1,DUSP1,DUSP4,DUSP5,DUSP6,CLN8,IL1B,MT3,OXA1L,SERPINE1,SERPINF1,SERPINA1,SERPINB9,RB1,RENBP,SCG5,SNCA,TFPI,TNFAIP3,VEGFA,URI1,CDC16,DNAJB6,SPRY2,MAD2L2,NPRL2,SPINT2,TNFAIP8,ANAPC5,ANAPC7,INPP5K,PIF1,CSRNP2,WDR81,SPRED2
GOBPID	GO:0051050	0.00336708	1.68438	23.1754	37	443	positive regulation of transport	BIN1,CD36,CD38,EDN1,HTR2B,IGF1,IL1A,IL1B,IL10,ITGAV,SERPINE1,CCL3,SGK1,SLC11A1,SNCA,SYK,TGFBR1,TLR2,TWIST1,VEGFA,WIPF1,WNT5A,ZP3,RAB9A,MERTK,KANK1,NCS1,CLEC4E,GREM1,PYCARD,TLR7,INPP5K,TESC,GIMAP5,CRTAM,STXBP5,CNKSR3
GOBPID	GO:0045861	0.00339244	4.75548	1.51713	6	29	negative regulation of proteolysis	CLN8,HSP90AB1,IDE,IL10,TIMP1,MAD2L2
GOBPID	GO:0050776	0.00347949	1.615	28.0407	43	536	regulation of immune response	BCL6,CD80,CD36,CD38,CD40,CLU,DUSP4,DUSP6,EREG,FYB,HLX,HSP90AB1,ICAM1,IL1B,IL2RA,IL10,IRAK1,IRAK2,MNDA,PTPN1,PTPN2,PVRL2,SLC11A1,STAT2,STAT5A,SYK,TLR2,TLR5,TNFAIP3,WNT5A,ZP3,TNIP1,POLR3G,TLR7,ERAP1,GIMAP5,POLR3B,ENAH,PAG1,CRTAM,SAMSN1,TNIP3,CD200R1
GOBPID	GO:0051239	0.00349553	1.35189	85.9008	110	1642	regulation of multicellular organismal process	ABL2,ADM,ADORA3,ASCL2,BCL6,BMP2,CD80,CD36,CD38,CD40,CD44,CEBPA,CMKLR1,CYP27B1,HBEGF,DUSP6,EDN1,EPHB2,EREG,FKBP4,FLT3,FXN,LRRC32,HHEX,HLX,HES1,HTR2B,ICAM1,IRF8,IGF1,IL1A,IL1B,IL2RA,IL10,IL18,CITED1,MT3,NAB2,PNP,PEBP1,SERPINE1,SERPINF1,PIK3CG,PLAUR,PMP22,PPP2R5B,PRKX,LGMN,PTGS2,PTPRM,CCL3,SGK1,SKIL,SLC11A1,SNAI1,SNCA,SRC,STAT5A,SYK,TGFBR1,TIMP1,TIMP2,TLR2,TLR5,TNFAIP3,TTC3,TWIST1,UBA7,VEGFA,VEGFB,W…
GOBPID	GO:0045089	0.00352782	2.22729	8.21341	17	157	positive regulation of innate immune response	DUSP4,DUSP6,EREG,IRAK1,IRAK2,PVRL2,STAT5A,TLR2,TLR5,TNFAIP3,TNIP1,POLR3G,TLR7,GIMAP5,POLR3B,CRTAM,TNIP3
GOBPID	GO:2000147	0.00354	2.03083	11.0384	21	211	positive regulation of cell motility	BMP2,CMKLR1,HBEGF,S1PR1,EDN1,ICAM1,IGF1,IL8,ITGAV,SERPINE1,PTGS2,CCL3,SNAI1,TLR2,TWIST1,VEGFA,VEGFB,WNT5A,ZP3,PPAP2B,PDPN
GOBPID	GO:0051128	0.00355757	1.41787	59.3772	80	1135	regulation of cellular component organization	ABL2,BIN1,ATM,BCL6,BMP2,CD36,CD38,CDKN1A,RCC1,CISH,CLU,CYP27B1,HBEGF,S1PR1,EDN1,EPHB2,EREG,ACSL4,FKBP4,FXN,ICAM1,IDE,IGF1,IL1A,IL1B,ITGAV,MT3,PEBP1,SERPINE1,PHB,PMAIP1,PMP22,PPP2R5B,PTPN1,RB1,CCL3,SDC4,SGK1,SKIL,SLC11A1,SNAI1,SNCA,SRC,SYK,TGFBR1,TTC3,TWIST1,VEGFA,WNT5A,LRP8,URI1,SOCS2,CDC16,MAD2L2,MERTK,C6orf108,PDPN,KANK1,CYFIP1,ARHGEF18,NCS1,CDC42EP4,ABTB2,CLIC4,GREM1,NPTN,SBDS,CRIM1,TNFRSF12A,…
GOBPID	GO:0045767	0.00362356	3.56176	2.56342	8	49	regulation of anti-apoptosis	ADM,APEX1,CDKN1A,DUSP1,CITED1,BTG2,TNFAIP8,SERBP1
GOBPID	GO:0031954	0.00363495	8.08865	0.680091	4	13	positive regulation of protein autophosphorylation	RAP2B,VEGFA,GREM1,RAP2C
GOBPID	GO:0045086	0.00363495	8.08865	0.680091	4	13	positive regulation of interleukin-2 biosynthetic process	CD80,IL1A,IL1B,STAT5A
GOBPID	GO:0043409	0.0036974	2.99609	3.71434	10	71	negative regulation of MAPK cascade	DUSP1,DUSP4,DUSP5,DUSP6,IGF1,PEBP1,SPRY2,TNIP1,CNKSR3,SPRED2
GOBPID	GO:0050921	0.0036974	2.99609	3.71434	10	71	positive regulation of chemotaxis	CMKLR1,S1PR1,EDN1,IL8,IL16,SERPINE1,CCL3,VEGFA,VEGFB,WNT5A
GOBPID	GO:0048661	0.00370119	3.99036	2.04027	7	39	positive regulation of smooth muscle cell proliferation	HBEGF,S1PR1,EDN1,EREG,IGF1,PTGS2,VEGFA
GOBPID	GO:0060255	0.00370602	1.24574	211.927	245	4051	regulation of macromolecule metabolic process	ADCY7,PARP1,APEX1,ASCL2,ATR,BACH1,BCL6,BMP2,ZFP36L2,CAT,SERPINH1,CCNE1,CCNG1,CD80,CD36,CD38,CD40,CD44,CDK4,CDKN1A,CDKN1C,CEBPA,CLU,CMKLR1,PLK3,DBP,DDX1,ARID3A,RCAN1,HBEGF,DUSP1,DUSP4,DUSP5,DUSP6,S1PR1,EDN1,CLN8,EREG,ETS2,EZH2,BPTF,FLI1,FLT3,FNTA,FOSL2,FZD2,GAPDH,LRRC32,KAT2A,NR3C1,GTF2F2,HHEX,HES1,HSP90AB1,HTR2B,ICAM1,IRF8,IDE,IFI16,IGF1,IL1A,IL1B,IL8,IL10,IL16,IL18,INSIG1,IRAK1,IRAK2,ITGAV,JUNB,…
GOBPID	GO:0050867	0.00376272	1.9489	12.5555	23	240	positive regulation of cell activation	BCL6,CD80,CD38,CD40,CDKN1A,MAP3K8,HLX,HES1,IGF1,IL1B,IL2RA,IL18,PNP,PVRL2,SRC,STAT5A,SYK,WNT5A,ZP3,VNN1,EBI3,PDPN,GIMAP5
GOBPID	GO:0071214	0.00377353	2.34922	6.90554	15	132	cellular response to abiotic stimulus	ATM,ATR,CASP5,CD40,CDKN1A,IL1B,IL18,LTBR,SERPINE1,TLR5,CRADD,PKD2L1,SLC12A6,INTS7,TLR7
GOBPID	GO:0045765	0.00379536	2.27379	7.58563	16	145	regulation of angiogenesis	ADM,HHEX,IL1A,IL1B,SERPINE1,SERPINF1,PTGS2,PTPRM,TNFAIP3,TWIST1,VEGFA,VEGFB,WNT5A,PLXND1,GPR124,HIPK2
GOBPID	GO:0070848	0.00381431	1.86231	14.8051	26	283	response to growth factor stimulus	ADCY7,BMP2,CAT,CD44,CLU,DUSP6,FLT3,FZD2,HHEX,IL1B,IL8,CITED1,MT1G,MT3,PPP2R5B,SKIL,SRC,TGFBR1,VEGFA,VEGFB,WNT5A,URI1,SPRY2,NPTN,INPP5K,SULF2
GOBPID	GO:0002274	0.00382264	2.53161	5.59767	13	107	myeloid leukocyte activation	CD48,IL8,IL10,MT1G,PIK3CG,PVRL2,CCL3,SLC11A1,SNCA,SYK,WNT5A,TLR7,GIMAP5
GOBPID	GO:0045926	0.00382288	2.10108	9.67822	19	185	negative regulation of growth	BCL6,CD36,CDKN1A,CYP27B1,FXN,IRF8,IL10,MT1A,MT1E,MT1G,MT1M,MT2A,MT3,PHB,LGMN,RB1,TLR2,WNT5A,GREM1
GOBPID	GO:0002576	0.00386266	2.79368	4.34212	11	83	platelet degranulation	CD36,CLU,F5,IGF1,SERPINE1,SERPINA1,PPBP,SYK,TIMP1,VEGFA,VEGFB
GOBPID	GO:0009058	0.00389282	1.23151	261.364	296	4996	biosynthetic process	ACADM,ADCY7,ADM,ADORA3,PARP1,AMPD3,APEX1,ASCL2,ATIC,ATM,ATP1B1,ATP5D,ATR,BACH1,BCAT1,BCL6,BMP2,ZFP36L2,CAT,CCNE1,CD80,CD36,CD38,CD40,CDKN1A,CDKN1C,CEBPA,CLU,CMKLR1,PLK3,CYP27B1,DBP,DDX1,NQO1,DKC1,ARID3A,RCAN1,HBEGF,DUSP5,S1PR1,EDN1,EIF2S3,CLN8,EREG,ETS2,EZH2,ACSL1,ACSL4,BPTF,FLI1,FOSL2,FXN,FZD2,GALNT2,GAPDH,GBE1,KAT2A,GK,GNA15,NR3C1,GTF2F2,HHEX,HLX,HES1,HSD11B1,HSP90AB1,HTR2B,ICAM1,IRF8,IFI16,IGF…
GOBPID	GO:0042094	0.00390397	5.69199	1.09861	5	21	interleukin-2 biosynthetic process	CD80,IL1A,IL1B,IL18,STAT5A
GOBPID	GO:0046633	0.00390397	5.69199	1.09861	5	21	alpha-beta T cell proliferation	CD80,DOCK2,IL18,SYK,EBI3
GOBPID	GO:0050926	0.00390397	5.69199	1.09861	5	21	regulation of positive chemotaxis	S1PR1,IL8,IL16,VEGFA,VEGFB
GOBPID	GO:0045444	0.00397958	2.41883	6.27777	14	120	fat cell differentiation	BMP2,CEBPA,HES1,INSIG1,PTGS2,SOD2,WNT5A,ERO1L,ERAP1,DLK2,ARL6,ARID5B,LRG1,SH3PXD2B
GOBPID	GO:0032729	0.00405622	4.557	1.56944	6	30	positive regulation of interferon-gamma production	IRF8,IL1B,IL18,SLC11A1,WNT5A,ZP3
GOBPID	GO:0042327	0.00411057	1.59818	28.3023	43	541	positive regulation of phosphorylation	ADCY7,BMP2,CD80,CD36,CD40,CD44,EDN1,EREG,FLT3,HES1,HTR2B,IGF1,IL1B,IL8,IRAK1,IRAK2,MAP3K5,MT3,OSM,PIK3CG,PPP2R5B,RAP2B,SDC4,SLC11A1,SNCA,SSR1,SYK,TGFBR1,VEGFA,VEGFB,WNT5A,ZP3,LRP8,PPAP2B,HERPUD1,SPRY2,MAD2L2,GREM1,NPTN,RAP2C,SRPRB,FAM129A,PPARGC1B
GOBPID	GO:0002690	0.00412046	3.4767	2.61574	8	50	positive regulation of leukocyte chemotaxis	CMKLR1,EDN1,IL8,SERPINE1,CCL3,VEGFA,VEGFB,WNT5A
GOBPID	GO:0007249	0.00417498	1.99882	11.1953	21	214	I-kappaB kinase/NF-kappaB cascade	CD36,CD40,HTR2B,IL1A,IL1B,IL10,IRAK1,IRAK2,LTBR,S100A12,TLR2,TNFAIP3,TRAF5,TANK,TNIP1,TRAF3IP2,GREM1,ATP2C1,TLR7,TERF2IP,TNIP3
GOBPID	GO:0046483	0.00417775	1.4404	51.0592	70	976	heterocycle metabolic process	ADCY7,ADM,ADORA3,AK4,AMPD3,BIN1,ARF4,RND3,ARHGAP5,ATIC,ATP1B1,ATP5D,BCL6,CAT,CD40,S1PR1,EDN1,EIF2S3,FXN,FZD2,GEM,GNA15,HTR2B,IMPDH2,IDO1,ALDH6A1,MSH2,MTHFD1,PNP,NT5E,NTHL1,OXA1L,P4HA1,PGD,PPAT,RAB13,RGS16,SHMT2,STAT5A,TIMP2,TPI1,UPP1,WNT5A,RAB7L1,KYNU,P4HA2,RAB9A,ENTPD4,C16orf7,ACAP1,DNAJB6,ARL4C,NAMPT,GPHN,SPRY2,PAICS,RASL10A,HIBADH,MRAS,RHOBTB3,KIF1B,RASGRP3,ARFGAP3,ATP2C1,RASD1,GNL3L,PID1,ADAP…
GOBPID	GO:0051090	0.00422699	1.78109	17.2115	29	329	regulation of sequence-specific DNA binding transcription factor activity	CAT,CD40,CLU,CMKLR1,FZD2,ICAM1,IL1B,IL10,IRAK1,IRAK2,NDP,PPP2R5B,RB1,SGK1,TLR2,TNFAIP3,TRAF5,TWIST1,VEGFA,WNT5A,LRP8,PPAP2B,HMGN3,GREM1,HIPK2,PYCARD,TERF2IP,ARID5B,GLIS2
GOBPID	GO:0006984	0.00424147	2.61348	5.02221	12	96	ER-nucleus signaling pathway	IL8,INSIG1,PPP2R5B,PTPN1,SSR1,HERPUD1,PPP1R15A,ERO1L,INSIG2,SRPRB,EIF2A,EIF2AK4
GOBPID	GO:0034599	0.00424147	2.61348	5.02221	12	96	cellular response to oxidative stress	CAT,CD36,FXN,IL18,MAP3K5,MGST1,MT3,SNCA,SOD2,TRAP1,FBLN5,PPARGC1B
GOBPID	GO:0061042	0.00425914	13.6365	0.366203	3	7	vascular wound healing	SERPINE1,TNFAIP3,VEGFB
GOBPID	GO:0090036	0.00425914	13.6365	0.366203	3	7	regulation of protein kinase C signaling cascade	CD40,VEGFA,WNT5A
GOBPID	GO:0090037	0.00425914	13.6365	0.366203	3	7	positive regulation of protein kinase C signaling cascade	CD40,VEGFA,WNT5A
GOBPID	GO:0071704	0.00427284	1.41518	57.18	77	1093	organic substance metabolic process	PARP1,AK4,AMPD3,BIN1,ARF4,RND3,ARHGAP5,ATP5D,BCL6,CD40,CD44,CHI3L2,AKR1C1,HBEGF,S1PR1,EIF2S3,GALNT2,GALT,GEM,GK,GNA15,HTR2B,IDE,IGF1,IL1B,IMPDH2,ITGB8,LTA4H,MSH2,MT3,PNP,NT5E,NTHL1,PEBP1,PFKFB3,PFKP,PPAT,RAB13,RENBP,RGS16,ST3GAL2,SYK,TPI1,UPP1,VEGFB,RAB7L1,RAB9A,CHST2,ENTPD4,HS2ST1,ACAP1,HS3ST3B1,GNPDA1,ARL4C,SPRY2,TNIP1,ST3GAL6,ST6GALNAC2,RASL10A,MRAS,PHLDA1,RHOBTB3,CHSY1,PTGR1,KIF1B,GPD1L,RASGR…
GOBPID	GO:0043549	0.00427966	1.56068	31.6504	47	605	regulation of kinase activity	ADCY7,CCNE1,CCNG1,CD40,CDKN1A,CDKN1C,DUSP1,DUSP4,DUSP5,DUSP6,EDN1,EREG,FLT3,HTR2B,IL1B,IL8,IRAK1,IRAK2,MAP3K5,MT3,PIK3CG,PPP2R5B,RAP2B,RB1,SDC4,SLC11A1,SNCA,SSR1,SYK,TGFBR1,TNFAIP3,VEGFA,WNT5A,ZP3,LRP8,CCNA1,HERPUD1,SPRY2,NPRL2,CAMKK2,SERTAD1,INPP5K,RAP2C,SRPRB,FAM58A,CCNYL1,SPRED2
GOBPID	GO:0046434	0.00432998	1.60218	27.5699	42	527	organophosphate catabolic process	AMPD3,BIN1,ARF4,RND3,ARHGAP5,ATP5D,BCL6,CAT,CD40,S1PR1,EIF2S3,GEM,GNA15,HTR2B,MSH2,PNP,NT5E,NTHL1,OXA1L,RAB13,RGS16,UPP1,RAB7L1,RAB9A,ENTPD4,ACAP1,DNAJB6,ARL4C,SPRY2,C6orf108,RASL10A,MRAS,RHOBTB3,KIF1B,GPD1L,RASGRP3,ARFGAP3,RASD1,INPP5K,GNL3L,ADAP2,AGAP4
GOBPID	GO:0051248	0.00443292	1.67823	21.9722	35	420	negative regulation of protein metabolic process	CDKN1A,DUSP1,DUSP4,DUSP5,DUSP6,EDN1,CLN8,HSP90AB1,IDE,IL1B,IL10,ITGAV,PEBP1,SERPINE1,RB1,SNCA,TIMP1,TNFAIP3,TWIST1,AKAP1,PPAP2B,CDC16,SPRY2,MAD2L2,GREM1,ANAPC5,ANAPC7,INPP5K,PID1,IMPACT,SAMSN1,FAM129A,CNKSR3,SPRED2,EIF2AK4
GOBPID	GO:0001934	0.00447578	1.59876	27.6222	42	528	positive regulation of protein phosphorylation	ADCY7,BMP2,CD80,CD36,CD40,CD44,EDN1,EREG,FLT3,HES1,HTR2B,IGF1,IL1B,IL8,IRAK1,IRAK2,MAP3K5,MT3,OSM,PIK3CG,PPP2R5B,RAP2B,SDC4,SLC11A1,SNCA,SSR1,SYK,TGFBR1,VEGFA,VEGFB,WNT5A,ZP3,LRP8,PPAP2B,HERPUD1,SPRY2,MAD2L2,GREM1,NPTN,RAP2C,SRPRB,FAM129A
GOBPID	GO:0001701	0.00447603	1.86202	14.2296	25	272	in utero embryonic development	ADM,ASCL2,BMP2,CEBPA,EDN1,KAT2A,HHEX,HES1,IL10,JUNB,MSH2,SKIL,SNAI1,TGFBR1,TWIST1,VEGFA,SLC30A1,ZP3,CSDA,DNAJB6,TANC2,PRPF19,SBDS,TSHZ3,CCNB1IP1
GOBPID	GO:0090407	0.00447603	1.86202	14.2296	25	272	organophosphate biosynthetic process	ADCY7,ADM,ADORA3,AMPD3,ATIC,ATP1B1,ATP5D,EDN1,GK,HTR2B,IMPDH2,MTHFD1,PNP,NT5E,PPAT,SNCA,UPP1,KYNU,PAPSS2,PAPSS1,C16orf7,NAMPT,PAICS,ATP2C1,PID1
GOBPID	GO:0002695	0.00461648	2.58254	5.07453	12	97	negative regulation of leukocyte activation	ATM,BCL6,FLT3,LRRC32,HLX,IL2RA,IL10,MNDA,TNFAIP3,GIMAP5,PAG1,SAMSN1
GOBPID	GO:0007275	0.00467941	1.24347	196.599	228	3758	multicellular organismal development	ABL2,ADM,AP2A2,ALDH3A2,BIN1,ARF4,ARVCF,ASCL2,ATIC,ATM,ATR,BCL6,BMP2,CAT,CCNE1,CCNG1,CD80,CD40,CD44,CDKN1A,CDKN1C,CEBPA,CLU,CMKLR1,VCAN,CSTA,CTSZ,CYP27B1,DDX1,DNASE2,DOCK2,RCAN1,HBEGF,DUSP1,DUSP4,DUSP5,DUSP6,S1PR1,EDN1,PHC2,EFNB2,EPHB2,CLN8,EREG,ETS2,ACSL4,BPTF,FKBP4,FLI1,FLT3,FXN,FZD2,KAT2A,GJB2,CXCL1,GSTM3,HHEX,HLX,HES1,HSD11B1,HSP90AB1,HTR2B,ICAM1,IRF8,IDE,IFI16,IGF1,IL1A,IL1B,IL2RA,IL8,IL10,IL…
GOBPID	GO:0032755	0.00481132	4.3744	1.62176	6	31	positive regulation of interleukin-6 production	CD36,IL1A,IL1B,TLR2,WNT5A,TLR7
GOBPID	GO:0051353	0.00481132	4.3744	1.62176	6	31	positive regulation of oxidoreductase activity	ABL2,CYP27B1,EDN1,FXN,HTR2B,IL1B
GOBPID	GO:0030947	0.00483797	5.35678	1.15092	5	22	regulation of vascular endothelial growth factor receptor signaling pathway	HHEX,IL1B,MT3,VEGFA,VEGFB
GOBPID	GO:0040036	0.00483797	5.35678	1.15092	5	22	regulation of fibroblast growth factor receptor signaling pathway	DUSP6,WNT5A,SPRY2,NPTN,SULF2
GOBPID	GO:0043903	0.00483797	5.35678	1.15092	5	22	regulation of symbiosis, encompassing mutualism through parasitism	CD36,IRF8,IL10,ITGAV,TLR2
GOBPID	GO:0046627	0.00483797	5.35678	1.15092	5	22	negative regulation of insulin receptor signaling pathway	IL1B,PTPN1,KANK1,INPP5K,PID1
GOBPID	GO:0046688	0.00483797	5.35678	1.15092	5	22	response to copper ion	ATP5D,ICAM1,IL1A,MT1G,SNCA
GOBPID	GO:0051412	0.00483797	5.35678	1.15092	5	22	response to corticosterone stimulus	CCNE1,CDKN1A,JUNB,MAOB,PEBP1
GOBPID	GO:1900077	0.00483797	5.35678	1.15092	5	22	negative regulation of cellular response to insulin stimulus	IL1B,PTPN1,KANK1,INPP5K,PID1
GOBPID	GO:0019430	0.0048805	7.27926	0.732406	4	14	removal of superoxide radicals	CD36,MT3,SOD2,FBLN5
GOBPID	GO:0046641	0.0048805	7.27926	0.732406	4	14	positive regulation of alpha-beta T cell proliferation	CD80,IL18,SYK,EBI3
GOBPID	GO:0071450	0.0048805	7.27926	0.732406	4	14	cellular response to oxygen radical	CD36,MT3,SOD2,FBLN5
GOBPID	GO:0071451	0.0048805	7.27926	0.732406	4	14	cellular response to superoxide	CD36,MT3,SOD2,FBLN5
GOBPID	GO:0032637	0.00494237	3.75508	2.1449	7	41	interleukin-8 production	IL1B,IL18,SERPINE1,TLR2,TLR5,WNT5A,TLR7
GOBPID	GO:0032880	0.00495885	1.77785	16.6361	28	318	regulation of protein localization	CD36,CD40,CDKN1A,LRRC32,HTR2B,IGF1,IL1A,IL1B,IL10,MXI1,RB1,CCL3,SYK,TGFBR1,TLR2,TWIST1,WIPF1,WNT5A,AKAP1,KANK1,CLEC4E,GREM1,RANGRF,PYCARD,TLR7,INPP5K,PID1,CRTAM
GOBPID	GO:0006766	0.00497019	2.35174	6.43471	14	123	vitamin metabolic process	CBR1,CBR3,CYP27B1,AKR1C1,MTHFD1,LGMN,SLC2A1,SNAI1,VNN2,VNN1,SLC23A2,NAMPT,DHRS9,GPHN
GOBPID	GO:0035966	0.00499805	2.27089	7.1148	15	136	response to topologically incorrect protein	SERPINH1,CLU,HSPA6,HSP90AB1,IL8,PPP2R5B,PTPN1,SSR1,HERPUD1,DNAJB6,PPP1R15A,ERO1L,SRPRB,CREB3L4,EIF2AK4
GOBPID	GO:0072521	0.00500551	1.50012	37.7712	54	722	purine-containing compound metabolic process	ADCY7,ADM,ADORA3,AK4,AMPD3,BIN1,ARF4,RND3,ARHGAP5,ATIC,ATP1B1,ATP5D,BCL6,CAT,CD40,S1PR1,EDN1,EIF2S3,FZD2,GEM,GNA15,HTR2B,IMPDH2,MSH2,MTHFD1,PNP,NT5E,OXA1L,PPAT,RAB13,RGS16,TIMP2,WNT5A,RAB7L1,RAB9A,C16orf7,ACAP1,DNAJB6,ARL4C,SPRY2,PAICS,RASL10A,MRAS,RHOBTB3,KIF1B,RASGRP3,ARFGAP3,ATP2C1,RASD1,GNL3L,PID1,ADAP2,QTRT1,AGAP4
GOBPID	GO:0009150	0.00503706	1.59594	26.9944	41	516	purine ribonucleotide metabolic process	AK4,AMPD3,BIN1,ARF4,RND3,ARHGAP5,ATIC,ATP1B1,ATP5D,BCL6,CD40,S1PR1,EIF2S3,GEM,GNA15,HTR2B,IMPDH2,MSH2,NT5E,PPAT,RAB13,RGS16,RAB7L1,RAB9A,C16orf7,ACAP1,ARL4C,SPRY2,PAICS,RASL10A,MRAS,RHOBTB3,KIF1B,RASGRP3,ARFGAP3,ATP2C1,RASD1,GNL3L,PID1,ADAP2,AGAP4
GOBPID	GO:0044249	0.0051943	1.22352	254.825	288	4871	cellular biosynthetic process	ACADM,ADCY7,ADM,ADORA3,PARP1,AMPD3,APEX1,ASCL2,ATIC,ATM,ATP1B1,ATP5D,ATR,BACH1,BCAT1,BCL6,BMP2,ZFP36L2,CAT,CCNE1,CD80,CD36,CD38,CD40,CDKN1A,CDKN1C,CEBPA,CLU,CMKLR1,PLK3,CYP27B1,DBP,DDX1,NQO1,DKC1,ARID3A,RCAN1,HBEGF,DUSP5,S1PR1,EDN1,EIF2S3,CLN8,EREG,ETS2,EZH2,ACSL1,ACSL4,BPTF,FLI1,FOSL2,FXN,FZD2,GALNT2,GBE1,KAT2A,GK,GNA15,NR3C1,GTF2F2,HHEX,HLX,HES1,HSD11B1,HSP90AB1,HTR2B,ICAM1,IRF8,IFI16,IGF1,IL1A…
GOBPID	GO:0006887	0.00525417	1.8618	13.6541	24	261	exocytosis	CD36,CLU,F5,IGF1,MYO5A,SERPINE1,SERPINA1,PIK3CG,PPBP,CCL3,SNCA,SYK,SYT1,TIMP1,VEGFA,VEGFB,ZP3,LIN7A,RAB9A,RIMS3,NCS1,ARHGAP17,TRIM36,STXBP5
GOBPID	GO:0071260	0.00527018	3.31818	2.72037	8	52	cellular response to mechanical stimulus	CASP5,CD40,IL1B,IL18,LTBR,TLR5,CRADD,TLR7
GOBPID	GO:0010562	0.00532358	1.57196	28.7208	43	549	positive regulation of phosphorus metabolic process	ADCY7,BMP2,CD80,CD36,CD40,CD44,EDN1,EREG,FLT3,HES1,HTR2B,IGF1,IL1B,IL8,IRAK1,IRAK2,MAP3K5,MT3,OSM,PIK3CG,PPP2R5B,RAP2B,SDC4,SLC11A1,SNCA,SSR1,SYK,TGFBR1,VEGFA,VEGFB,WNT5A,ZP3,LRP8,PPAP2B,HERPUD1,SPRY2,MAD2L2,GREM1,NPTN,RAP2C,SRPRB,FAM129A,PPARGC1B
GOBPID	GO:0045937	0.00532358	1.57196	28.7208	43	549	positive regulation of phosphate metabolic process	ADCY7,BMP2,CD80,CD36,CD40,CD44,EDN1,EREG,FLT3,HES1,HTR2B,IGF1,IL1B,IL8,IRAK1,IRAK2,MAP3K5,MT3,OSM,PIK3CG,PPP2R5B,RAP2B,SDC4,SLC11A1,SNCA,SSR1,SYK,TGFBR1,VEGFA,VEGFB,WNT5A,ZP3,LRP8,PPAP2B,HERPUD1,SPRY2,MAD2L2,GREM1,NPTN,RAP2C,SRPRB,FAM129A,PPARGC1B
GOBPID	GO:0070371	0.00534144	2.33019	6.48703	14	124	ERK1 and ERK2 cascade	CD44,DUSP6,HTR2B,IGF1,IL1A,IL1B,ITGAV,MT3,CCL3,SYK,VEGFB,SPRY2,TNIP1,CNKSR3
GOBPID	GO:0002696	0.00540652	1.91542	12.1893	22	233	positive regulation of leukocyte activation	BCL6,CD80,CD38,CD40,CDKN1A,MAP3K8,HLX,HES1,IGF1,IL1B,IL2RA,IL18,PNP,PVRL2,SRC,STAT5A,SYK,WNT5A,ZP3,VNN1,EBI3,GIMAP5
GOBPID	GO:1901135	0.00545041	1.41152	54.2504	73	1037	carbohydrate derivative metabolic process	PARP1,AK4,AMPD3,BIN1,ARF4,RND3,ARHGAP5,ATP5D,BCL6,CD40,CD44,CHI3L2,AKR1C1,HBEGF,S1PR1,EIF2S3,GALNT2,GALT,GEM,GK,GNA15,HTR2B,IDE,IGF1,IL1B,IMPDH2,ITGB8,MSH2,MT3,PNP,NT5E,NTHL1,PFKFB3,PFKP,PPAT,RAB13,RENBP,RGS16,ST3GAL2,TPI1,UPP1,VEGFB,RAB7L1,RAB9A,CHST2,ENTPD4,HS2ST1,ACAP1,HS3ST3B1,GNPDA1,ARL4C,SPRY2,TNIP1,ST3GAL6,ST6GALNAC2,RASL10A,MRAS,PHLDA1,RHOBTB3,CHSY1,KIF1B,GPD1L,RASGRP3,ARFGAP3,RASD1,GNL3L…
GOBPID	GO:0006007	0.00550667	2.81089	3.9236	10	75	glucose catabolic process	GAPDH,IGF1,LDHA,PFKFB3,PFKP,PGD,TPI1,HIBADH,DDIT4,DHTKD1
GOBPID	GO:2001233	0.00566913	3.64753	2.19722	7	42	regulation of apoptotic signaling pathway	CLU,LTBR,MCL1,PMAIP1,SRC,TNFRSF12A,PARL
GOBPID	GO:0023051	0.00575236	1.30917	98.1947	122	1877	regulation of signaling	ADM,AP2A2,ARHGAP5,ATM,ATR,BCL6,BMP2,CAT,CD80,CD36,CD38,CD40,CD44,CDKN1C,CISH,CLU,CMKLR1,CYP27B1,HBEGF,DUSP1,DUSP4,DUSP5,DUSP6,S1PR1,EDN1,EREG,EZH2,FLT3,HHEX,HES1,HSP90AB1,HTR2B,IGF1,IL1A,IL1B,IL8,IL10,IRAK1,IRAK2,LTBR,MAOB,MCL1,MAP3K5,MFNG,CITED1,MT3,MYO5A,OSM,PEBP1,SERPINE1,PHB,PIK3CG,PMAIP1,PPP2R5B,PTGS2,PTPN1,PTPN2,RB1,RGS16,S100A12,CCL3,SCG5,SKIL,SLC2A1,SNAI1,SNCA,SRC,STAT2,SYK,TGFBR1,TIMP2,T…
GOBPID	GO:0071900	0.00589913	1.73379	17.6301	29	337	regulation of protein serine/threonine kinase activity	CCNE1,CCNG1,CD40,CDKN1A,CDKN1C,DUSP1,DUSP4,DUSP5,DUSP6,EDN1,FLT3,HTR2B,IL1B,IRAK1,IRAK2,MAP3K5,PIK3CG,SNCA,SYK,TNFAIP3,VEGFA,WNT5A,CCNA1,SPRY2,SERTAD1,INPP5K,FAM58A,CCNYL1,SPRED2
GOBPID	GO:0045582	0.00592963	3.24421	2.77268	8	53	positive regulation of T cell differentiation	CD80,HLX,IL2RA,PNP,STAT5A,SYK,VNN1,GIMAP5
GOBPID	GO:0071363	0.00604451	1.83811	13.8111	24	264	cellular response to growth factor stimulus	ADCY7,BMP2,CAT,CD44,CLU,DUSP6,FLT3,FZD2,HHEX,IL1B,IL8,MT1G,MT3,PPP2R5B,SRC,TGFBR1,VEGFA,VEGFB,WNT5A,URI1,SPRY2,NPTN,INPP5K,SULF2
GOBPID	GO:0030335	0.00605581	1.96292	10.8291	20	207	positive regulation of cell migration	BMP2,CMKLR1,HBEGF,S1PR1,EDN1,ICAM1,IGF1,IL8,ITGAV,SERPINE1,PTGS2,CCL3,SNAI1,TLR2,VEGFA,VEGFB,WNT5A,ZP3,PPAP2B,PDPN
GOBPID	GO:0043523	0.00615084	2.28824	6.59165	14	126	regulation of neuron apoptotic process	ATM,NQO1,IL18,CITED1,MSH2,MT3,PMAIP1,LGMN,CCL3,SNCA,SOD2,VEGFB,NR4A3,HIPK2
GOBPID	GO:1901214	0.00615084	2.28824	6.59165	14	126	regulation of neuron death	ATM,NQO1,IL18,CITED1,MSH2,MT3,PMAIP1,LGMN,CCL3,SNCA,SOD2,VEGFB,NR4A3,HIPK2
GOBPID	GO:0002520	0.00631974	1.57193	27.3606	41	523	immune system development	ATM,BCL6,CD80,CD40,CEBPA,DNASE2,DOCK2,FLT3,HHEX,HLX,HES1,IRF8,IFI16,IL2RA,IL10,JUNB,LYL1,MSH2,MT1G,PNP,PRKX,CCL3,SOD2,STAT5A,SYK,TGFBR1,TIMP1,TNFAIP3,VEGFA,WNT5A,VNN1,SWAP70,HIPK2,BLNK,SBDS,TET2,TESC,GIMAP5,TWSG1,TTC7A,PPARGC1B
GOBPID	GO:0045954	0.00638316	6.61702	0.784721	4	15	positive regulation of natural killer cell mediated cytotoxicity	PVRL2,STAT5A,GIMAP5,CRTAM
GOBPID	GO:0061082	0.00638316	6.61702	0.784721	4	15	myeloid leukocyte cytokine production	BCL6,CD36,TLR2,WNT5A
GOBPID	GO:0019538	0.00647004	1.23168	197.907	228	3783	protein metabolic process	ABL2,ADCY7,ADH5,PARP1,ATM,ATR,BLMH,BMP2,C1QBP,CASP5,SERPINH1,CCNE1,CCNG1,CD80,CD36,CD40,CD44,CDK4,CDKN1A,CDKN1C,CISH,CLU,PLK3,MAP3K8,CSTA,CTSZ,DDX1,HBEGF,DUSP1,DUSP4,DUSP5,DUSP6,EDN1,EIF2S3,EPHB2,CLN8,EREG,EZH2,FKBP4,FLT3,FNTA,FXN,FYB,GALNT2,GAPDH,KAT2A,GNA15,HES1,HSP90AB1,HTR2B,IDE,IGF1,IL1A,IL1B,IL8,IL10,IL18,IRAK1,IRAK2,ITGAV,LTA4H,MAP3K5,MMP1,MMP10,MMP12,MMP19,MT3,OSM,P4HA1,PEBP1,SERPINE1,PCS…
GOBPID	GO:0002367	0.00647295	3.54595	2.24953	7	43	cytokine production involved in immune response	BCL6,CD36,IL10,SLC11A1,TLR2,WNT5A,GIMAP5
GOBPID	GO:0046635	0.00647295	3.54595	2.24953	7	43	positive regulation of alpha-beta T cell activation	CD80,HLX,IL18,PNP,SYK,EBI3,GIMAP5
GOBPID	GO:0009790	0.00648742	1.45283	42.5319	59	813	embryo development	ADM,ASCL2,ATM,BMP2,CD44,CEBPA,DUSP1,DUSP4,DUSP5,DUSP6,EDN1,EPHB2,ACSL4,FXN,FZD2,KAT2A,HHEX,HLX,HES1,HTR2B,IL1B,IL8,IL10,INSIG1,JUNB,MSH2,NAGLU,PCSK5,SKIL,SNAI1,TGFBR1,TPI1,TWIST1,VEGFA,WNT5A,WNT6,SLC30A1,ZP3,NR4A3,CSDA,PPAP2B,HS2ST1,DNAJB6,SPRY2,SEMA3C,DEAF1,PDPN,TANC2,GREM1,PRPF19,HIPK2,SBDS,INSIG2,ENAH,SULF2,TWSG1,TSHZ3,CCNB1IP1,SETDB2
GOBPID	GO:0030323	0.00652659	2.19757	7.32406	15	140	respiratory tube development	CEBPA,CTSZ,HHEX,HES1,HSD11B1,IGF1,IL18,LTA4H,PCSK5,TGFBR1,VEGFA,WNT5A,SPRY2,PDPN,TSHZ3
GOBPID	GO:0001547	0.00655112	10.9084	0.418518	3	8	antral ovarian follicle growth	CCNE1,EREG,ZP3
GOBPID	GO:0006573	0.00655112	10.9084	0.418518	3	8	valine metabolic process	ALDH6A1,STAT5A,HIBADH
GOBPID	GO:0032933	0.00655112	10.9084	0.418518	3	8	SREBP signaling pathway	INSIG1,INSIG2,EIF2A
GOBPID	GO:0045779	0.00655112	10.9084	0.418518	3	8	negative regulation of bone resorption	CD38,TNFAIP3,VEGFA
GOBPID	GO:0046543	0.00655112	10.9084	0.418518	3	8	development of secondary female sexual characteristics	CAT,STAT5A,WNT5A
GOBPID	GO:0046643	0.00655112	10.9084	0.418518	3	8	regulation of gamma-delta T cell activation	STAT5A,SYK,GIMAP5
GOBPID	GO:0046645	0.00655112	10.9084	0.418518	3	8	positive regulation of gamma-delta T cell activation	STAT5A,SYK,GIMAP5
GOBPID	GO:0060363	0.00655112	10.9084	0.418518	3	8	cranial suture morphogenesis	INSIG1,TWIST1,INSIG2
GOBPID	GO:0061081	0.00655112	10.9084	0.418518	3	8	positive regulation of myeloid leukocyte cytokine production involved in immune response	CD36,TLR2,WNT5A
GOBPID	GO:0051897	0.00664995	3.17345	2.82499	8	54	positive regulation of protein kinase B signaling cascade	HBEGF,IGF1,PIK3CG,CCL3,TGFBR1,VEGFB,ZP3,SPRY2
GOBPID	GO:0002460	0.00668432	2.02484	9.46896	18	181	adaptive immune response based on somatic recombination of immune receptors built from immunoglobulin superfamily domains	BCL6,CD80,CD40,CLU,HLX,ICAM1,IL1B,IL10,IL18,MSH2,PVRL2,SLC11A1,TNFAIP3,VEGFA,ZP3,EBI3,SWAP70,GIMAP5
GOBPID	GO:0055080	0.00676286	1.65295	20.9782	33	401	cation homeostasis	ABCB7,ADM,CD38,CD40,CYP27B1,S1PR1,EDN1,FXN,FZD2,GNA15,HTR2B,IL1B,MT1A,MT2A,MT3,CCL1,CCL3,CCL15,CCL23,SLC8A3,SLC9A5,SLC11A1,SNCA,SOD2,SLC30A1,NPTN,ATP2C1,SLC25A37,GIMAP5,TTC7A,HAMP,SFXN2,SFXN4
GOBPID	GO:0046903	0.00688023	1.46758	39.236	55	750	secretion	ADM,CD36,CD38,CD40,CLU,EDN1,F5,LRRC32,HTR2B,IGF1,IL1A,IL1B,IL10,LTBP2,MAOB,MYO5A,PNP,OSM,SERPINE1,PCSK5,SERPINA1,PIK3CG,PPAT,PPBP,CCL3,SGK1,SCG5,SLC2A1,SLC22A4,SNCA,STAT5A,SYK,SYT1,TIMP1,TLR2,TWIST1,VEGFA,VEGFB,WNT5A,SLC30A1,ZP3,LIN7A,HMGN3,RAB9A,RIMS3,MERTK,NCS1,CLEC4E,ARFGAP3,PYCARD,SLC38A2,ARHGAP17,TRIM36,CRTAM,STXBP5
GOBPID	GO:0019221	0.00692323	1.71105	17.8393	29	341	cytokine-mediated signaling pathway	CD44,CEBPA,CMKLR1,EDN1,EREG,FLT3,HSP90AB1,ICAM1,IRF8,IL1A,IL1B,IL2RA,IL3RA,IRAK1,IRAK2,MT2A,MT3,PLP2,PTPN1,PTPN2,STAT2,STAT5A,UBA7,WNT5A,LRP8,NUPL1,EBI3,PYCARD,EIF4E3
GOBPID	GO:1901292	0.0071086	1.56852	26.7328	40	511	nucleoside phosphate catabolic process	AMPD3,BIN1,ARF4,RND3,ARHGAP5,ATP5D,BCL6,CAT,CD40,S1PR1,EIF2S3,GEM,GNA15,HTR2B,MSH2,PNP,NT5E,NTHL1,OXA1L,RAB13,RGS16,UPP1,RAB7L1,RAB9A,ENTPD4,ACAP1,DNAJB6,ARL4C,SPRY2,C6orf108,RASL10A,MRAS,RHOBTB3,KIF1B,RASGRP3,ARFGAP3,RASD1,GNL3L,ADAP2,AGAP4
GOBPID	GO:0034614	0.00713503	2.88269	3.45277	9	66	cellular response to reactive oxygen species	CAT,CD36,FXN,IL18,MAP3K5,MT3,SOD2,FBLN5,PPARGC1B
GOBPID	GO:0051341	0.00713503	2.88269	3.45277	9	66	regulation of oxidoreductase activity	ABL2,CYP27B1,EDN1,FXN,HTR2B,IL1B,MT3,OXA1L,SNCA
GOBPID	GO:0060021	0.00713503	2.88269	3.45277	9	66	palate development	EPHB2,FZD2,INSIG1,SNAI1,TGFBR1,WNT5A,INSIG2,CSRNP1,ARID5B
GOBPID	GO:0009889	0.00714982	1.2392	171.645	200	3281	regulation of biosynthetic process	ADCY7,ADM,ADORA3,PARP1,APEX1,ASCL2,ATR,BACH1,BCL6,BMP2,ZFP36L2,CAT,CCNE1,CD80,CD36,CD38,CD40,CDKN1A,CDKN1C,CEBPA,CLU,CMKLR1,PLK3,DBP,DDX1,ARID3A,RCAN1,HBEGF,DUSP5,S1PR1,EDN1,EREG,ETS2,EZH2,BPTF,FLI1,FOSL2,FZD2,KAT2A,NR3C1,GTF2F2,HHEX,HES1,HSP90AB1,ICAM1,IRF8,IFI16,IGF1,IL1A,IL1B,IL10,IL16,IL18,INSIG1,IRAK1,IRAK2,ITGAV,JUNB,LYL1,MXD1,MNDA,CITED1,MT3,MTF1,MXI1,NAB2,NDP,NFATC3,NFIL3,OSM,PDK3,PHB,PLA…
GOBPID	GO:0002675	0.0071619	4.79221	1.25555	5	24	positive regulation of acute inflammatory response	IL1B,OSM,PIK3CG,PTGS2,ZP3
GOBPID	GO:0031952	0.0071619	4.79221	1.25555	5	24	regulation of protein autophosphorylation	PPP2R5B,RAP2B,VEGFA,GREM1,RAP2C
GOBPID	GO:0046006	0.0071619	4.79221	1.25555	5	24	regulation of activated T cell proliferation	LRRC32,IGF1,IL2RA,IL18,STAT5A
GOBPID	GO:0009260	0.00716477	2.54483	4.70832	11	90	ribonucleotide biosynthetic process	AMPD3,ATIC,ATP1B1,ATP5D,IMPDH2,PPAT,UPP1,C16orf7,PAICS,ATP2C1,PID1
GOBPID	GO:0019320	0.00716477	2.54483	4.70832	11	90	hexose catabolic process	GALT,GAPDH,IGF1,LDHA,PFKFB3,PFKP,PGD,TPI1,HIBADH,DDIT4,DHTKD1
GOBPID	GO:0032355	0.00716477	2.54483	4.70832	11	90	response to estradiol stimulus	CCNE1,CD38,DUSP1,IL1B,IL10,SERPINA1,PTGS2,WNT5A,PRDM2,NCOA1,SOCS2
GOBPID	GO:0061138	0.00722137	2.10865	8.10878	16	155	morphogenesis of a branching epithelium	ADM,BMP2,CTSZ,EDN1,HHEX,IGF1,IL10,CITED1,NFATC3,SRC,VEGFA,WNT5A,WNT6,SEMA3C,PLXND1,GREM1
GOBPID	GO:0034654	0.0072489	1.80744	14.0203	24	268	nucleobase-containing compound biosynthetic process	ADCY7,ADM,ADORA3,AMPD3,ATIC,ATP1B1,ATP5D,EDN1,HTR2B,IMPDH2,MTHFD1,PNP,NT5E,PPAT,UPP1,KYNU,PAPSS2,PAPSS1,C16orf7,NAMPT,PAICS,ATP2C1,PID1,QTRT1
GOBPID	GO:0009152	0.00726851	2.68629	4.08055	10	78	purine ribonucleotide biosynthetic process	AMPD3,ATIC,ATP1B1,ATP5D,IMPDH2,PPAT,C16orf7,PAICS,ATP2C1,PID1
GOBPID	GO:0045766	0.00726851	2.68629	4.08055	10	78	positive regulation of angiogenesis	ADM,IL1A,IL1B,SERPINE1,PTGS2,TWIST1,VEGFA,VEGFB,WNT5A,HIPK2
GOBPID	GO:2001020	0.00726851	2.68629	4.08055	10	78	regulation of response to DNA damage stimulus	APEX1,ATM,ATR,CD44,PMAIP1,SNAI1,TWIST1,TRIM28,TERF2IP,SPRED2
GOBPID	GO:0051346	0.00736625	1.8895	11.7708	21	225	negative regulation of hydrolase activity	SERPINH1,CD44,CSTA,MT3,OXA1L,SERPINE1,SERPINF1,SERPINA1,SERPINB9,RENBP,SNCA,TFPI,TNFAIP3,VEGFA,URI1,DNAJB6,SPRY2,SPINT2,TNFAIP8,CSRNP2,WDR81
GOBPID	GO:0046634	0.00743456	3.1057	2.87731	8	55	regulation of alpha-beta T cell activation	BCL6,CD80,HLX,IL18,PNP,SYK,EBI3,GIMAP5
GOBPID	GO:0031668	0.00746911	2	9.57359	18	183	cellular response to extracellular stimulus	ABL2,CCNE1,CDKN1A,CYP27B1,FZD2,ICAM1,LDHA,PMAIP1,SLC2A1,SUPT5H,WNT5A,WNT6,NCOA1,TESC,TP53INP2,MAP1LC3A,ATG4C,EIF2AK4
GOBPID	GO:0006986	0.00754615	2.22806	6.7486	14	129	response to unfolded protein	SERPINH1,HSPA6,HSP90AB1,IL8,PPP2R5B,PTPN1,SSR1,HERPUD1,DNAJB6,PPP1R15A,ERO1L,SRPRB,CREB3L4,EIF2AK4
GOBPID	GO:0050708	0.00757037	2.30888	6.06851	13	116	regulation of protein secretion	CD40,LRRC32,HTR2B,IL1A,IL10,CCL3,SYK,TLR2,TWIST1,WNT5A,CLEC4E,PYCARD,CRTAM
GOBPID	GO:0009156	0.00769512	3.90486	1.7787	6	34	ribonucleoside monophosphate biosynthetic process	AMPD3,ATIC,IMPDH2,PPAT,UPP1,PAICS
GOBPID	GO:0042035	0.00777658	2.51284	4.76064	11	91	regulation of cytokine biosynthetic process	CD80,EREG,IL1A,IL1B,IL10,STAT5A,SYK,TLR2,WNT5A,EBI3,TLR7
GOBPID	GO:0007005	0.00783474	1.91109	11.0907	20	212	mitochondrion organization	BCS1L,CEBPA,CLU,CLN8,FXN,IGF1,OXA1L,PMAIP1,PVRL2,SNCA,SOD2,TIMM44,SAMM50,TIMM9,PID1,GIMAP5,PARL,CHCHD6,EARS2,PPARGC1B
GOBPID	GO:0000103	0.00791492	36.3236	0.156944	2	3	sulfate assimilation	PAPSS2,PAPSS1
GOBPID	GO:0001306	0.00791492	36.3236	0.156944	2	3	age-dependent response to oxidative stress	CLN8,SOD2
GOBPID	GO:0007571	0.00791492	36.3236	0.156944	2	3	age-dependent general metabolic decline	CLN8,SOD2
GOBPID	GO:0009158	0.00791492	36.3236	0.156944	2	3	ribonucleoside monophosphate catabolic process	AMPD3,NT5E
GOBPID	GO:0009169	0.00791492	36.3236	0.156944	2	3	purine ribonucleoside monophosphate catabolic process	AMPD3,NT5E
GOBPID	GO:0017014	0.00791492	36.3236	0.156944	2	3	protein nitrosylation	ADH5,GAPDH
GOBPID	GO:0018119	0.00791492	36.3236	0.156944	2	3	peptidyl-cysteine S-nitrosylation	ADH5,GAPDH
GOBPID	GO:0018401	0.00791492	36.3236	0.156944	2	3	peptidyl-proline hydroxylation to 4-hydroxy-L-proline	P4HA1,P4HA2
GOBPID	GO:0030967	0.00791492	36.3236	0.156944	2	3	ER-nuclear sterol response pathway	INSIG1,INSIG2
GOBPID	GO:0032632	0.00791492	36.3236	0.156944	2	3	interleukin-3 production	SLC11A1,SYK
GOBPID	GO:0036015	0.00791492	36.3236	0.156944	2	3	response to interleukin-3	IL3RA,MT2A
GOBPID	GO:0036016	0.00791492	36.3236	0.156944	2	3	cellular response to interleukin-3	IL3RA,MT2A
GOBPID	GO:0045425	0.00791492	36.3236	0.156944	2	3	positive regulation of granulocyte macrophage colony-stimulating factor biosynthetic process	CD80,SYK
GOBPID	GO:0045629	0.00791492	36.3236	0.156944	2	3	negative regulation of T-helper 2 cell differentiation	BCL6,HLX
GOBPID	GO:0051856	0.00791492	36.3236	0.156944	2	3	adhesion to symbiont	ICAM1,PVRL2
GOBPID	GO:0060509	0.00791492	36.3236	0.156944	2	3	Type I pneumocyte differentiation	IGF1,LTA4H
GOBPID	GO:0060613	0.00791492	36.3236	0.156944	2	3	fat pad development	ARID5B,DGAT2
GOBPID	GO:0061009	0.00791492	36.3236	0.156944	2	3	common bile duct development	HHEX,HES1
GOBPID	GO:0071421	0.00791492	36.3236	0.156944	2	3	manganese ion transmembrane transport	SLC11A1,ZP3
GOBPID	GO:0071447	0.00791492	36.3236	0.156944	2	3	cellular response to hydroperoxide	CD36,MGST1
GOBPID	GO:0071501	0.00791492	36.3236	0.156944	2	3	cellular response to sterol depletion	INSIG1,INSIG2
GOBPID	GO:0071639	0.00791492	36.3236	0.156944	2	3	positive regulation of monocyte chemotactic protein-1 production	IL1B,TWIST1
GOBPID	GO:0090289	0.00791492	36.3236	0.156944	2	3	regulation of osteoclast proliferation	TNFAIP3,GREM1
GOBPID	GO:0031400	0.00808153	1.74456	15.6944	26	300	negative regulation of protein modification process	CDKN1A,DUSP1,DUSP4,DUSP5,DUSP6,IL1B,PEBP1,RB1,SNCA,TNFAIP3,TWIST1,AKAP1,PPAP2B,CDC16,SPRY2,MAD2L2,GREM1,ANAPC5,ANAPC7,INPP5K,PID1,IMPACT,SAMSN1,FAM129A,CNKSR3,SPRED2
GOBPID	GO:0030330	0.00812219	2.28651	6.12082	13	117	DNA damage response, signal transduction by p53 class mediator	ATM,ATR,CD44,CDKN1A,IFI16,MSH2,PMAIP1,SNAI1,TWIST1,DYRK2,CRADD,HIPK2,SPRED2
GOBPID	GO:0072507	0.00814359	1.81292	13.3926	23	256	divalent inorganic cation homeostasis	ADM,CD38,CD40,CYP27B1,S1PR1,EDN1,FZD2,GNA15,HTR2B,IL1B,MT1A,MT3,CCL1,CCL3,CCL15,CCL23,SLC8A3,SLC11A1,SNCA,SLC30A1,NPTN,ATP2C1,GIMAP5
GOBPID	GO:0080135	0.00814359	1.81292	13.3926	23	256	regulation of cellular response to stress	APEX1,ATM,ATR,CD36,CD44,EDN1,IL1A,IL1B,IRAK1,LTBR,MAP3K5,PMAIP1,SNAI1,SUPT5H,SYK,TWIST1,VEGFA,WNT5A,TRIM28,FBLN5,HIPK2,TERF2IP,SPRED2
GOBPID	GO:1901293	0.00814359	1.81292	13.3926	23	256	nucleoside phosphate biosynthetic process	ADCY7,ADM,ADORA3,AMPD3,ATIC,ATP1B1,ATP5D,EDN1,HTR2B,IMPDH2,MTHFD1,PNP,NT5E,PPAT,UPP1,KYNU,PAPSS2,PAPSS1,C16orf7,NAMPT,PAICS,ATP2C1,PID1
GOBPID	GO:0002717	0.00816365	6.06516	0.837036	4	16	positive regulation of natural killer cell mediated immunity	PVRL2,STAT5A,GIMAP5,CRTAM
GOBPID	GO:0030949	0.00816365	6.06516	0.837036	4	16	positive regulation of vascular endothelial growth factor receptor signaling pathway	IL1B,MT3,VEGFA,VEGFB
GOBPID	GO:0044117	0.00816365	6.06516	0.837036	4	16	growth of symbiont in host	CD36,IRF8,IL10,TLR2
GOBPID	GO:0044126	0.00816365	6.06516	0.837036	4	16	regulation of growth of symbiont in host	CD36,IRF8,IL10,TLR2
GOBPID	GO:0044130	0.00816365	6.06516	0.837036	4	16	negative regulation of growth of symbiont in host	CD36,IRF8,IL10,TLR2
GOBPID	GO:0044267	0.00823382	1.23642	166.518	194	3183	cellular protein metabolic process	ABL2,ADCY7,ADH5,PARP1,ATM,ATR,BLMH,BMP2,CCNE1,CCNG1,CD80,CD36,CD40,CD44,CDK4,CDKN1A,CDKN1C,CISH,CLU,PLK3,MAP3K8,CSTA,DDX1,HBEGF,DUSP1,DUSP4,DUSP5,DUSP6,EDN1,EIF2S3,EPHB2,CLN8,EREG,EZH2,FKBP4,FLT3,FNTA,FXN,FYB,GALNT2,GAPDH,KAT2A,GNA15,HES1,HSP90AB1,HTR2B,IDE,IGF1,IL1B,IL8,IL10,IRAK1,IRAK2,ITGAV,MAP3K5,MT3,OSM,P4HA1,PEBP1,PCSK5,PDK3,PHB,PIK3CG,PLAUR,PMAIP1,PPP2R5B,PRKX,PTPN1,PTPN2,PTPN4,PTPRM,RAP2B…
GOBPID	GO:0043154	0.00828688	3.04078	2.92962	8	56	negative regulation of cysteine-type endopeptidase activity involved in apoptotic process	CD44,MT3,SERPINB9,SNCA,TNFAIP3,VEGFA,DNAJB6,TNFAIP8
GOBPID	GO:0010942	0.00843969	1.5098	31.1796	45	596	positive regulation of cell death	ATM,BCL6,BMP2,CD38,CD40,CDKN1A,CLU,NQO1,DUSP1,DUSP6,IFI16,IL1B,IL2RA,IL10,IL18,MAP3K5,MNDA,MSH2,MT3,PLAGL2,PMAIP1,PPP3CC,PTGS2,PVRL2,CCL3,STAT5A,TGFBR1,TLR2,WNT5A,NR4A3,DYRK2,NCOA1,CRADD,TSC22D1,PHLDA1,ARHGEF18,NUPR1,HIPK2,PYCARD,IL19,G0S2,TNFRSF12A,GIMAP5,CRTAM,LZTS2
GOBPID	GO:0000188	0.00857447	4.55226	1.30787	5	25	inactivation of MAPK activity	DUSP1,DUSP4,DUSP5,DUSP6,SPRED2
GOBPID	GO:0050866	0.00866167	2.359	5.49305	12	105	negative regulation of cell activation	ATM,BCL6,FLT3,LRRC32,HLX,IL2RA,IL10,MNDA,TNFAIP3,GIMAP5,PAG1,SAMSN1
GOBPID	GO:0048520	0.0086657	2.60915	4.18518	10	80	positive regulation of behavior	CMKLR1,S1PR1,EDN1,IL8,IL16,SERPINE1,CCL3,VEGFA,VEGFB,WNT5A
GOBPID	GO:0048598	0.0086826	1.59702	22.9662	35	439	embryonic morphogenesis	ADM,CD44,DUSP1,DUSP4,DUSP5,DUSP6,EDN1,EPHB2,FZD2,KAT2A,HHEX,HLX,HES1,HTR2B,IL1B,IL10,INSIG1,NAGLU,SNAI1,TGFBR1,TWIST1,WNT5A,WNT6,NR4A3,PPAP2B,HS2ST1,DNAJB6,SPRY2,DEAF1,GREM1,HIPK2,INSIG2,ENAH,TWSG1,SETDB2
GOBPID	GO:0009987	0.00886586	1.35265	665.443	686	12720	cellular process	ABCB7,ABL2,ACADM,ADCY7,ADH5,ADM,ADORA3,PARP1,AP2A2,AP1B1,AHCY,AK4,ALDH3A2,AMPD3,BIN1,AOX1,APEX1,AQP9,ARF4,RND3,ARHGAP5,ARVCF,ASCL2,ATIC,ATM,ATP1B1,ATP5D,ATR,BACH1,BCAT1,BCL6,BCS1L,BLMH,BMP2,ZFP36L2,CA12,CASP5,CAT,CBR1,CBR3,CCNE1,CCNG1,CD80,CD36,CD38,CD40,CD44,CD48,CD68,CDK4,CDKN1A,CDKN1C,CEBPA,RCC1,CISH,CLU,CMKLR1,PLK3,MAP3K8,VCAN,CSTA,CYP27B1,DBP,AKR1C1,DDX1,NQO1,DKC1,DNASE2,DOCK2,ARID3A,RCAN1,H…
GOBPID	GO:0032655	0.00888587	3.76993	1.83102	6	35	regulation of interleukin-12 production	CD36,CD40,CMKLR1,IRF8,IL10,TLR2
GOBPID	GO:0033138	0.00888587	3.76993	1.83102	6	35	positive regulation of peptidyl-serine phosphorylation	CD44,OSM,SNCA,VEGFA,SPRY2,MAD2L2
GOBPID	GO:0042088	0.00888587	3.76993	1.83102	6	35	T-helper 1 type immune response	CD80,HLX,IL18,SLC11A1,VEGFA,EBI3
GOBPID	GO:0071695	0.00888587	3.76993	1.83102	6	35	anatomical structure maturation	BMP2,IGF1,LYL1,MYO5A,PTGS2,GREM1
GOBPID	GO:0022603	0.0088866	1.53557	27.9361	41	534	regulation of anatomical structure morphogenesis	ADM,BMP2,CD36,CD44,DUSP6,EDN1,FXN,HHEX,HES1,ICAM1,IL1A,IL1B,IL18,MT3,SERPINE1,SERPINF1,PTGS2,PTPRM,CCL3,SKIL,SNAI1,TNFAIP3,TTC3,TWIST1,VEGFA,VEGFB,WNT5A,WNT6,LRP8,PDPN,PLXND1,KANK1,CYFIP1,ARHGEF18,CDC42EP4,GPR124,GREM1,HIPK2,TNFRSF12A,PID1,RHOU
GOBPID	GO:0051251	0.0090915	1.88127	11.2477	20	215	positive regulation of lymphocyte activation	BCL6,CD80,CD38,CD40,CDKN1A,MAP3K8,HLX,HES1,IGF1,IL1B,IL2RA,IL18,PNP,SRC,STAT5A,SYK,ZP3,VNN1,EBI3,GIMAP5
GOBPID	GO:0044419	0.00911381	1.62791	20.612	32	394	interspecies interaction between organisms	BIN1,C1QBP,CD80,CD36,CEBPA,EFNB2,KAT2A,ICAM1,IRF8,IDE,IL10,IL16,ITGAV,LTBR,MAP3K5,MMP1,PVRL2,RB1,ABCE1,CCL3,SLAMF1,SRC,STAT2,SYK,TLR2,TNIP1,WWP1,HIPK2,PILRA,TLR7,INPP5K,CD200R1
GOBPID	GO:0008015	0.00913899	1.72528	15.8514	26	303	blood circulation	ADH5,ADM,ADORA3,CD38,RCAN1,HBEGF,EDN1,F5,HTR2B,ICAM1,IL18,PEBP1,PCSK5,PIK3CG,PTGS2,PTPRM,RENBP,SGK1,SOD2,SRC,VEGFA,VEGFB,CELF2,MYOF,ERAP1,ERAP2
GOBPID	GO:0031669	0.00914818	2.04906	8.31804	16	159	cellular response to nutrient levels	ABL2,CCNE1,CYP27B1,FZD2,ICAM1,PMAIP1,SLC2A1,SUPT5H,WNT5A,WNT6,NCOA1,TESC,TP53INP2,MAP1LC3A,ATG4C,EIF2AK4
GOBPID	GO:0072503	0.00914838	1.81902	12.7648	22	244	cellular divalent inorganic cation homeostasis	ADM,CD38,CD40,S1PR1,EDN1,FZD2,GNA15,HTR2B,IL1B,MT1A,MT3,CCL1,CCL3,CCL15,CCL23,SLC8A3,SLC11A1,SNCA,SLC30A1,NPTN,ATP2C1,GIMAP5
GOBPID	GO:0009266	0.00931779	2.33373	5.54536	12	106	response to temperature stimulus	ADM,HTR2B,IL1A,IL1B,IL18,OSM,PEBP1,VEGFA,CSDA,MYOF,ERO1L,LXN
GOBPID	GO:0009166	0.00934868	1.54758	26.3666	39	504	nucleotide catabolic process	AMPD3,BIN1,ARF4,RND3,ARHGAP5,ATP5D,BCL6,CAT,CD40,S1PR1,EIF2S3,GEM,GNA15,HTR2B,MSH2,PNP,NT5E,NTHL1,OXA1L,RAB13,RGS16,UPP1,RAB7L1,RAB9A,ENTPD4,ACAP1,DNAJB6,ARL4C,SPRY2,RASL10A,MRAS,RHOBTB3,KIF1B,RASGRP3,ARFGAP3,RASD1,GNL3L,ADAP2,AGAP4
GOBPID	GO:0033591	0.00944776	9.08964	0.470832	3	9	response to L-ascorbic acid	IL1A,IL1B,SOD2
GOBPID	GO:0043931	0.00944776	9.08964	0.470832	3	9	ossification involved in bone maturation	BMP2,IGF1,GREM1
GOBPID	GO:0045090	0.00944776	9.08964	0.470832	3	9	retroviral genome replication	IL8,SUPT5H,INPP5K
GOBPID	GO:0046033	0.00944776	9.08964	0.470832	3	9	AMP metabolic process	AK4,AMPD3,NT5E
GOBPID	GO:0048711	0.00944776	9.08964	0.470832	3	9	positive regulation of astrocyte differentiation	BMP2,HES1,PRPF19
GOBPID	GO:0090201	0.00944776	9.08964	0.470832	3	9	negative regulation of release of cytochrome c from mitochondria	FXN,IGF1,PARL
GOBPID	GO:0097094	0.00944776	9.08964	0.470832	3	9	craniofacial suture morphogenesis	INSIG1,TWIST1,INSIG2
GOBPID	GO:0003013	0.00951563	1.71894	15.9037	26	304	circulatory system process	ADH5,ADM,ADORA3,CD38,RCAN1,HBEGF,EDN1,F5,HTR2B,ICAM1,IL18,PEBP1,PCSK5,PIK3CG,PTGS2,PTPRM,RENBP,SGK1,SOD2,SRC,VEGFA,VEGFB,CELF2,MYOF,ERAP1,ERAP2
GOBPID	GO:0031326	0.0096944	1.22843	170.023	197	3250	regulation of cellular biosynthetic process	ADCY7,ADM,ADORA3,PARP1,APEX1,ASCL2,ATR,BACH1,BCL6,BMP2,ZFP36L2,CAT,CCNE1,CD80,CD36,CD38,CD40,CDKN1A,CDKN1C,CEBPA,CLU,CMKLR1,PLK3,DBP,DDX1,ARID3A,RCAN1,HBEGF,DUSP5,S1PR1,EDN1,EREG,ETS2,EZH2,BPTF,FLI1,FOSL2,FZD2,KAT2A,NR3C1,GTF2F2,HHEX,HES1,HSP90AB1,ICAM1,IRF8,IFI16,IGF1,IL1A,IL1B,IL10,IL16,INSIG1,IRAK1,IRAK2,JUNB,LYL1,MXD1,MNDA,CITED1,MT3,MTF1,MXI1,NAB2,NDP,NFATC3,NFIL3,OSM,PDK3,PHB,PLAGL2,PPP2R5B…
GOBPID	GO:0046365	0.00985792	2.42148	4.91758	11	94	monosaccharide catabolic process	GALT,GAPDH,IGF1,LDHA,PFKFB3,PFKP,PGD,TPI1,HIBADH,DDIT4,DHTKD1
GOBPID	GO:0051172	0.00994411	1.41393	44.3106	60	847	negative regulation of nitrogen compound metabolic process	ASCL2,ATR,BACH1,BCL6,BMP2,CD36,CD38,CDKN1C,CEBPA,PLK3,DUSP5,EDN1,EREG,EZH2,BPTF,HHEX,HES1,IRF8,IFI16,IL10,IRAK1,CITED1,MSH2,MT3,NAB2,NFIL3,PHB,RB1,RFX5,CCL3,SRSF7,SKIL,SNAI1,SUPT5H,TWIST1,WNT5A,ZNF189,ZP3,LRP8,CSDA,URI1,DNAJB6,TRIM28,WWP1,ZHX2,SIN3B,HEY1,GREM1,HIPK2,RASD1,INPP5K,TERF2IP,PID1,GIMAP5,TSHZ3,SETDB2,ARID5B,GLIS2,PPARGC1B,GLIS3
GOBPID	GO:0070372	0.0100119	2.309	5.59767	12	107	regulation of ERK1 and ERK2 cascade	CD44,DUSP6,IGF1,IL1A,IL1B,MT3,CCL3,SYK,VEGFB,SPRY2,TNIP1,CNKSR3
GOBPID	GO:2000026	0.0101306	1.38017	52.2101	69	998	regulation of multicellular organismal development	ABL2,ADM,ASCL2,BCL6,BMP2,CD80,CD40,CD44,CYP27B1,DUSP6,EDN1,EPHB2,FKBP4,FLT3,FXN,HHEX,HLX,HES1,IGF1,IL1A,IL1B,IL2RA,IL10,MT3,NAB2,PNP,SERPINE1,SERPINF1,PMP22,PPP2R5B,PRKX,PTGS2,PTPRM,CCL3,SKIL,SNAI1,STAT5A,SYK,TGFBR1,TIMP1,TIMP2,TNFAIP3,TTC3,TWIST1,VEGFA,VEGFB,WNT5A,WNT6,ZP3,LRP8,CSDA,NCOA1,VNN1,DEAF1,PLXND1,KANK1,NCS1,GPR124,GREM1,NPTN,PRPF19,HIPK2,TNFRSF12A,TESC,GIMAP5,CDK5RAP2,ANKH,TGIF2,PPARGC…
GOBPID	GO:0032570	0.0101686	4.33517	1.36018	5	26	response to progesterone stimulus	CCNE1,CD38,JUNB,SRC,NCOA1
GOBPID	GO:0050798	0.0101686	4.33517	1.36018	5	26	activated T cell proliferation	LRRC32,IGF1,IL2RA,IL18,STAT5A
GOBPID	GO:0007566	0.0102028	3.644	1.88333	6	36	embryo implantation	FKBP4,IL1B,PCSK5,PTGS2,TGFBR1,TIMP1
GOBPID	GO:0045595	0.0102125	1.40011	46.9786	63	898	regulation of cell differentiation	ABL2,ADM,ASCL2,BCL6,BMP2,CCNE1,CD80,CD36,CEBPA,CLU,CYP27B1,RCAN1,DUSP6,EDN1,EREG,FKBP4,FLT3,FXN,HLX,HES1,IGF1,IL2RA,INSIG1,ITGAV,JUNB,CITED1,MT3,PNP,SERPINF1,PMP22,PPP2R5B,PRKX,PTGS2,CCL3,SKIL,SNAI1,SOD2,STAT5A,SYK,TGFBR1,TIMP2,TTC3,TWIST1,VEGFA,WNT5A,LRP8,NCOA1,VNN1,KANK1,NCS1,GREM1,NPTN,PRPF19,TNFRSF12A,TESC,GIMAP5,CDK5RAP2,TWSG1,TSHZ3,TGIF2,DLK2,PPARGC1B,SH3PXD2B
GOBPID	GO:0000303	0.0102408	5.5982	0.88935	4	17	response to superoxide	CD36,MT3,SOD2,FBLN5
GOBPID	GO:0044110	0.0102408	5.5982	0.88935	4	17	growth involved in symbiotic interaction	CD36,IRF8,IL10,TLR2
GOBPID	GO:0044116	0.0102408	5.5982	0.88935	4	17	growth of symbiont involved in interaction with host	CD36,IRF8,IL10,TLR2
GOBPID	GO:0044144	0.0102408	5.5982	0.88935	4	17	modulation of growth of symbiont involved in interaction with host	CD36,IRF8,IL10,TLR2
GOBPID	GO:0044146	0.0102408	5.5982	0.88935	4	17	negative regulation of growth of symbiont involved in interaction with host	CD36,IRF8,IL10,TLR2
GOBPID	GO:0030198	0.0102541	2.0205	8.42267	16	161	extracellular matrix organization	LAMC1,MMP1,MMP10,MYH11,P4HA1,SNCA,TGFBR1,TIMP1,TIMP2,TPSAB1,FBLN5,OLFML2B,GREM1,SULF2,CRISPLD2,SH3PXD2B
GOBPID	GO:0051302	0.0102601	2.53631	4.28981	10	82	regulation of cell division	CAT,EREG,HTR2B,IL1A,IL1B,OSM,PPBP,VEGFA,VEGFB,CSPP1
GOBPID	GO:0071901	0.0102601	2.53631	4.28981	10	82	negative regulation of protein serine/threonine kinase activity	CDKN1A,DUSP1,DUSP4,DUSP5,DUSP6,IL1B,TNFAIP3,SPRY2,INPP5K,SPRED2
GOBPID	GO:0045807	0.0104259	2.69287	3.66203	9	70	positive regulation of endocytosis	BIN1,CD36,ITGAV,SERPINE1,SLC11A1,SNCA,VEGFA,MERTK,GREM1
GOBPID	GO:0048856	0.0106622	1.21555	192.361	220	3677	anatomical structure development	ABL2,ADM,AP2A2,ALDH3A2,BIN1,ARF4,ASCL2,ATIC,ATM,BCL6,BMP2,CAT,CCNE1,CCNG1,CD80,CD36,CD40,CD44,CDKN1A,CDKN1C,CEBPA,CLU,CMKLR1,VCAN,CSTA,CTSZ,CYP27B1,DNASE2,DOCK2,RCAN1,HBEGF,DUSP1,DUSP4,DUSP5,DUSP6,S1PR1,EDN1,EFNB2,EPHB2,CLN8,EREG,ETS2,ACSL4,BPTF,FKBP4,FLI1,FLT3,FXN,FZD2,KAT2A,GJB2,CXCL1,GSTM3,HHEX,HLX,HES1,HSD11B1,HSP90AB1,HTR2B,ICAM1,IRF8,IFI16,IGF1,IL1A,IL1B,IL2RA,IL8,IL10,IL18,INSIG1,ITGAV,ITG…
GOBPID	GO:0006875	0.0107222	1.70021	16.0606	26	307	cellular metal ion homeostasis	ABCB7,ADM,CD38,CD40,S1PR1,EDN1,FXN,FZD2,GNA15,HTR2B,IL1B,MT1A,MT3,CCL1,CCL3,CCL15,CCL23,SLC8A3,SLC11A1,SNCA,SLC30A1,NPTN,ATP2C1,GIMAP5,TTC7A,HAMP
GOBPID	GO:0043062	0.0108454	2.00652	8.47498	16	162	extracellular structure organization	LAMC1,MMP1,MMP10,MYH11,P4HA1,SNCA,TGFBR1,TIMP1,TIMP2,TPSAB1,FBLN5,OLFML2B,GREM1,SULF2,CRISPLD2,SH3PXD2B
GOBPID	GO:0010556	0.0110341	1.22682	162.96	189	3115	regulation of macromolecule biosynthetic process	PARP1,APEX1,ASCL2,ATR,BACH1,BCL6,BMP2,ZFP36L2,CAT,CCNE1,CD80,CD36,CD38,CD40,CDKN1A,CDKN1C,CEBPA,CLU,CMKLR1,PLK3,DBP,DDX1,ARID3A,RCAN1,HBEGF,DUSP5,S1PR1,EDN1,EREG,ETS2,EZH2,BPTF,FLI1,FOSL2,FZD2,KAT2A,NR3C1,GTF2F2,HHEX,HES1,ICAM1,IRF8,IFI16,IGF1,IL1A,IL1B,IL10,IL16,IL18,INSIG1,IRAK1,IRAK2,ITGAV,JUNB,LYL1,MXD1,MNDA,CITED1,MT3,MTF1,MXI1,NAB2,NDP,NFATC3,NFIL3,OSM,PHB,PLAGL2,PPP2R5B,RB1,RFX5,SGK1,SKIL,…
GOBPID	GO:0006366	0.0110958	1.33239	66.649	85	1274	transcription from RNA polymerase II promoter	PARP1,ASCL2,BACH1,BCL6,BMP2,CCNE1,CD36,CD40,CDKN1C,CEBPA,PLK3,DBP,S1PR1,EDN1,ETS2,BPTF,FOSL2,KAT2A,NR3C1,GTF2F2,HHEX,HES1,IRF8,IGF1,IL1B,INSIG1,JUNB,CITED1,MT3,MTF1,NFATC3,NFIL3,OSM,PHB,RB1,RFX5,SRSF7,SKIL,SLC11A1,HLTF,SNAI1,SOD2,SS18,STAT2,STAT5A,SUPT5H,TLR2,TWIST1,VEGFA,WNT5A,ZNF189,LRP8,NR4A3,TTF2,CSDA,RUVBL1,NCOA1,URI1,TSC22D1,CCNA1,HMGN3,SRA1,CEBPZ,TRIM28,TNIP1,DEAF1,NFAT5,ZHX2,HEY1,GREM1,HI…
GOBPID	GO:0051094	0.0111177	1.47563	32.5398	46	622	positive regulation of developmental process	ADM,BMP2,CCNE1,CD80,CD36,CEBPA,CLU,CYP27B1,EDN1,EPHB2,FXN,HLX,HES1,IGF1,IL1A,IL1B,IL2RA,JUNB,PNP,SERPINE1,SERPINF1,PTGS2,SKIL,SNAI1,STAT5A,SYK,TWIST1,VEGFA,VEGFB,WNT5A,WNT6,ZP3,LRP8,NCOA1,VNN1,GREM1,NPTN,PRPF19,HIPK2,TNFRSF12A,TESC,GIMAP5,TSHZ3,TGIF2,PPARGC1B,SH3PXD2B
GOBPID	GO:0034762	0.0112595	1.80845	12.2416	21	234	regulation of transmembrane transport	CD36,CDKN1A,IGF1,IL1B,IL10,ITGAV,MXI1,MYO5A,TGFBR1,TLR2,TWIST1,SLC30A1,ZP3,AKAP1,PKD2L1,KANK1,NCS1,GREM1,RANGRF,TLR7,TESC
GOBPID	GO:0043407	0.0112844	2.86128	3.08657	8	59	negative regulation of MAP kinase activity	DUSP1,DUSP4,DUSP5,DUSP6,IL1B,SPRY2,INPP5K,SPRED2
GOBPID	GO:0048145	0.0112844	2.86128	3.08657	8	59	regulation of fibroblast proliferation	CDK4,CDKN1A,EREG,FOSL2,IGF1,PMAIP1,SOD2,WNT5A
GOBPID	GO:2000117	0.0112844	2.86128	3.08657	8	59	negative regulation of cysteine-type endopeptidase activity	CD44,MT3,SERPINB9,SNCA,TNFAIP3,VEGFA,DNAJB6,TNFAIP8
GOBPID	GO:0042254	0.0113444	2.04861	7.79489	15	149	ribosome biogenesis	DKC1,FBL,NHP2L1,SURF6,RRS1,DCAF13,FTSJ2,SBDS,GNL3L,NOL8,WDR12,RBFA,EIF2A,IMP4,WDR36
GOBPID	GO:0031099	0.0113726	2.18082	6.3824	13	122	regeneration	ADM,ATIC,CCNE1,CDKN1A,CEBPA,VCAN,IGF1,SERPINE1,PLAUR,PPAT,TGFBR1,NR4A3,CSDA
GOBPID	GO:0030097	0.011382	1.55363	24.2217	36	463	hemopoiesis	ATM,BCL6,CD80,CEBPA,DNASE2,DOCK2,FLT3,HHEX,HLX,HES1,IRF8,IFI16,IL2RA,IL10,JUNB,LYL1,MSH2,MT1G,PNP,PRKX,CCL3,SOD2,STAT5A,SYK,TIMP1,VEGFA,WNT5A,VNN1,HIPK2,BLNK,TET2,TESC,GIMAP5,TWSG1,TTC7A,PPARGC1B
GOBPID	GO:0010948	0.0114672	2.36415	5.02221	11	96	negative regulation of cell cycle process	ATM,BCL6,MSH2,OSM,PPP2R5B,RB1,CDC16,MAD2L2,ANAPC5,ANAPC7,CDK5RAP2
GOBPID	GO:0048534	0.0115175	1.53308	25.8958	38	495	hemopoietic or lymphoid organ development	ATM,BCL6,CD80,CEBPA,DNASE2,DOCK2,FLT3,HHEX,HLX,HES1,IRF8,IFI16,IL2RA,IL10,JUNB,LYL1,MSH2,MT1G,PNP,PRKX,CCL3,SOD2,STAT5A,SYK,TGFBR1,TIMP1,VEGFA,WNT5A,VNN1,HIPK2,BLNK,SBDS,TET2,TESC,GIMAP5,TWSG1,TTC7A,PPARGC1B
GOBPID	GO:0002009	0.0115935	1.68794	16.1652	26	309	morphogenesis of an epithelium	ADM,BMP2,CTSZ,EDN1,KAT2A,HHEX,HES1,IGF1,IL10,CITED1,NFATC3,PRKX,SRC,STAT5A,TWIST1,VEGFA,WNT5A,WNT6,HS2ST1,MTSS1,SEMA3C,DEAF1,PLXND1,GREM1,ENAH,SETDB2
GOBPID	GO:0009124	0.0116526	3.52619	1.93564	6	37	nucleoside monophosphate biosynthetic process	AMPD3,ATIC,IMPDH2,PPAT,UPP1,PAICS
GOBPID	GO:0032615	0.0116526	3.52619	1.93564	6	37	interleukin-12 production	CD36,CD40,CMKLR1,IRF8,IL10,TLR2
GOBPID	GO:0031330	0.0118131	3.11238	2.51111	7	48	negative regulation of cellular catabolic process	HSP90AB1,HTR2B,IL10,MT3,TIMP1,MAD2L2,DDIT4
GOBPID	GO:0032722	0.0119544	4.13782	1.4125	5	27	positive regulation of chemokine production	IL1B,IL18,TLR2,TWIST1,TLR7
GOBPID	GO:0051385	0.0119544	4.13782	1.4125	5	27	response to mineralocorticoid stimulus	CCNE1,CDKN1A,JUNB,MAOB,PEBP1
GOBPID	GO:0072332	0.0119544	4.13782	1.4125	5	27	signal transduction by p53 class mediator resulting in induction of apoptosis	IFI16,MSH2,PMAIP1,DYRK2,HIPK2
GOBPID	GO:0090287	0.0119544	4.13782	1.4125	5	27	regulation of cellular response to growth factor stimulus	HHEX,IL1B,MT3,VEGFA,VEGFB
GOBPID	GO:0050863	0.0120918	1.8243	11.5616	20	221	regulation of T cell activation	BCL6,CD80,MAP3K8,LRRC32,HLX,HES1,IGF1,IL1B,IL2RA,IL10,IL18,PNP,SRC,STAT5A,SYK,ZP3,VNN1,EBI3,GIMAP5,PAG1
GOBPID	GO:0002263	0.0121293	2.16083	6.43471	13	123	cell activation involved in immune response	BCL6,CD80,CD40,HLX,ICAM1,IL10,MSH2,PIK3CG,CCL3,SLC11A1,SYK,SWAP70,TLR7
GOBPID	GO:0002366	0.0121293	2.16083	6.43471	13	123	leukocyte activation involved in immune response	BCL6,CD80,CD40,HLX,ICAM1,IL10,MSH2,PIK3CG,CCL3,SLC11A1,SYK,SWAP70,TLR7
GOBPID	GO:0072331	0.0121293	2.16083	6.43471	13	123	signal transduction by p53 class mediator	ATM,ATR,CD44,CDKN1A,IFI16,MSH2,PMAIP1,SNAI1,TWIST1,DYRK2,CRADD,HIPK2,SPRED2
GOBPID	GO:0051726	0.0121831	1.43788	36.9865	51	707	regulation of cell cycle	ATM,ATR,BCL6,BMP2,CCNE1,CCNG1,CDK4,CDKN1A,CDKN1C,RCC1,PLK3,CYP27B1,EDN1,EREG,IGF1,IL1A,IL1B,IL8,JUNB,MCM6,MSH2,OSM,PEBP1,PPP2R5B,PTGS2,RB1,SKIL,STAT5A,TGFBR1,TNFAIP3,WNT5A,NR4A3,CRADD,CDC16,CCNA1,MAD2L2,BTG3,PPP1R15A,INTS7,SESN1,HIPK2,SERTAD1,SBDS,ANAPC5,ANAPC7,PID1,CDK5RAP2,CSPP1,SESN2,FAM58A,CCNYL1
GOBPID	GO:0043065	0.0122177	1.48637	30.1856	43	577	positive regulation of apoptotic process	ATM,BCL6,BMP2,CD38,CD40,CDKN1A,CLU,NQO1,DUSP1,DUSP6,IFI16,IL1B,IL2RA,IL10,IL18,MAP3K5,MNDA,MSH2,PLAGL2,PMAIP1,PPP3CC,PTGS2,PVRL2,CCL3,STAT5A,TGFBR1,TLR2,WNT5A,NR4A3,DYRK2,NCOA1,CRADD,TSC22D1,PHLDA1,ARHGEF18,NUPR1,HIPK2,PYCARD,IL19,G0S2,TNFRSF12A,GIMAP5,CRTAM
GOBPID	GO:0045597	0.0124096	1.5534	23.5416	35	450	positive regulation of cell differentiation	ADM,BMP2,CCNE1,CD80,CD36,CEBPA,CLU,CYP27B1,FXN,HLX,HES1,IGF1,IL2RA,JUNB,PNP,SERPINF1,PTGS2,SKIL,SNAI1,STAT5A,SYK,TWIST1,VEGFA,NCOA1,VNN1,GREM1,NPTN,PRPF19,TNFRSF12A,TESC,GIMAP5,TSHZ3,TGIF2,PPARGC1B,SH3PXD2B
GOBPID	GO:0051896	0.0124461	2.607	3.76666	9	72	regulation of protein kinase B signaling cascade	HBEGF,IGF1,PIK3CG,CCL3,TGFBR1,VEGFB,ZP3,SPRY2,INPP5K
GOBPID	GO:0019932	0.0125158	2.08191	7.16712	14	137	second-messenger-mediated signaling	ADM,CD36,CMKLR1,RCAN1,EDN1,HTR2B,IGF1,IL8,MT1A,PEBP1,CCL3,SYK,CAMKK2,RASD1
GOBPID	GO:0030324	0.0125158	2.08191	7.16712	14	137	lung development	CEBPA,CTSZ,HHEX,HES1,HSD11B1,IGF1,IL18,LTA4H,TGFBR1,VEGFA,WNT5A,SPRY2,PDPN,TSHZ3
GOBPID	GO:0000305	0.0126318	5.19795	0.941665	4	18	response to oxygen radical	CD36,MT3,SOD2,FBLN5
GOBPID	GO:0010575	0.0126318	5.19795	0.941665	4	18	positive regulation vascular endothelial growth factor production	IL1A,IL1B,PTGS2,SULF2
GOBPID	GO:0010894	0.0126318	5.19795	0.941665	4	18	negative regulation of steroid biosynthetic process	BMP2,INSIG1,SNAI1,INSIG2
GOBPID	GO:0042104	0.0126318	5.19795	0.941665	4	18	positive regulation of activated T cell proliferation	IGF1,IL2RA,IL18,STAT5A
GOBPID	GO:0046640	0.0126318	5.19795	0.941665	4	18	regulation of alpha-beta T cell proliferation	CD80,IL18,SYK,EBI3
GOBPID	GO:0051930	0.0126318	5.19795	0.941665	4	18	regulation of sensory perception of pain	EDN1,IL1A,IL10,CCL3
GOBPID	GO:0051931	0.0126318	5.19795	0.941665	4	18	regulation of sensory perception	EDN1,IL1A,IL10,CCL3
GOBPID	GO:0034655	0.0126328	1.50553	27.7268	40	530	nucleobase-containing compound catabolic process	AMPD3,BIN1,ARF4,RND3,ARHGAP5,ATP5D,BCL6,CAT,CD40,S1PR1,EIF2S3,GEM,GNA15,HTR2B,MSH2,PNP,NT5E,NTHL1,OXA1L,RAB13,RGS16,UPP1,RAB7L1,RAB9A,ENTPD4,ACAP1,DNAJB6,ARL4C,SPRY2,C6orf108,RASL10A,MRAS,RHOBTB3,KIF1B,RASGRP3,ARFGAP3,RASD1,GNL3L,ADAP2,AGAP4
GOBPID	GO:0060562	0.0129651	1.84226	10.8815	19	208	epithelial tube morphogenesis	ADM,BMP2,CTSZ,KAT2A,HHEX,HES1,CITED1,PRKX,SRC,TWIST1,VEGFA,WNT5A,WNT6,HS2ST1,MTSS1,DEAF1,GREM1,ENAH,SETDB2
GOBPID	GO:0010829	0.0129778	7.79055	0.523147	3	10	negative regulation of glucose transport	IL1B,INPP5K,PID1
GOBPID	GO:0010934	0.0129778	7.79055	0.523147	3	10	macrophage cytokine production	CD36,TLR2,WNT5A
GOBPID	GO:0010935	0.0129778	7.79055	0.523147	3	10	regulation of macrophage cytokine production	CD36,TLR2,WNT5A
GOBPID	GO:0040037	0.0129778	7.79055	0.523147	3	10	negative regulation of fibroblast growth factor receptor signaling pathway	WNT5A,SPRY2,SULF2
GOBPID	GO:0045136	0.0129778	7.79055	0.523147	3	10	development of secondary sexual characteristics	CAT,STAT5A,WNT5A
GOBPID	GO:0046629	0.0129778	7.79055	0.523147	3	10	gamma-delta T cell activation	STAT5A,SYK,GIMAP5
GOBPID	GO:0001776	0.0131781	3.03805	2.56342	7	49	leukocyte homeostasis	FLT3,IL2RA,PMAIP1,SKIL,STAT5A,TNFAIP3,GIMAP5
GOBPID	GO:0002718	0.0132417	3.41575	1.98796	6	38	regulation of cytokine production involved in immune response	BCL6,CD36,IL10,TLR2,WNT5A,GIMAP5
GOBPID	GO:0006040	0.0132417	3.41575	1.98796	6	38	amino sugar metabolic process	CHI3L2,RENBP,ST3GAL2,CHST2,GNPDA1,NAGK
GOBPID	GO:0048146	0.0132417	3.41575	1.98796	6	38	positive regulation of fibroblast proliferation	CDK4,CDKN1A,EREG,FOSL2,IGF1,WNT5A
GOBPID	GO:0042060	0.0134833	1.46272	32.0689	45	613	wound healing	ATP1B1,C1QBP,CD36,CD40,CD48,CLU,HBEGF,EDN1,EREG,F5,GNA15,IGF1,IL1A,IL1B,ITGAV,MMP1,MMP12,SERPINE1,SERPINA1,PIK3CG,PLAUR,PPBP,PTPN1,RAD51C,SDC2,SLC8A3,SLC11A1,SRC,SYK,TFPI,TGFBR1,TIMP1,TNFAIP3,VEGFA,VEGFB,WNT5A,LRP8,AKAP1,MERTK,PDPN,EHD1,KANK1,MYOF,TREM1,APBB1IP
GOBPID	GO:0002706	0.0135592	2.56608	3.81897	9	73	regulation of lymphocyte mediated immunity	BCL6,CD40,IL1B,IL10,PVRL2,STAT5A,ZP3,GIMAP5,CRTAM
GOBPID	GO:0009895	0.0135592	2.56608	3.81897	9	73	negative regulation of catabolic process	HSP90AB1,HTR2B,IL1B,IL10,MT3,TIMP1,MAD2L2,DDIT4,GIMAP5
GOBPID	GO:0051129	0.0135942	1.68142	15.5898	25	298	negative regulation of cellular component organization	ATM,CLU,S1PR1,FKBP4,FXN,IGF1,MT3,PMP22,SNCA,SRC,TTC3,TWIST1,WNT5A,CDC16,MAD2L2,KANK1,SBDS,ANAPC5,ANAPC7,INPP5K,TERF2IP,PID1,PARL,CDK5RAP2,MID1IP1
GOBPID	GO:0048568	0.0136391	1.70087	14.8051	24	283	embryonic organ development	ADM,ASCL2,CEBPA,EDN1,EPHB2,FZD2,HHEX,HLX,IL8,IL10,INSIG1,JUNB,NAGLU,PCSK5,SNAI1,TGFBR1,TWIST1,VEGFA,WNT5A,NR4A3,DNAJB6,SPRY2,HIPK2,INSIG2
GOBPID	GO:0042990	0.013684	2.7529	3.1912	8	61	regulation of transcription factor import into nucleus	CD36,IL1B,IL10,MXI1,TLR2,AKAP1,GREM1,TLR7
GOBPID	GO:0042991	0.013684	2.7529	3.1912	8	61	transcription factor import into nucleus	CD36,IL1B,IL10,MXI1,TLR2,AKAP1,GREM1,TLR7
GOBPID	GO:0048144	0.013684	2.7529	3.1912	8	61	fibroblast proliferation	CDK4,CDKN1A,EREG,FOSL2,IGF1,PMAIP1,SOD2,WNT5A
GOBPID	GO:0060341	0.0136921	1.4815	29.5578	42	565	regulation of cellular localization	CD36,CD38,CD40,CDKN1A,EDN1,LRRC32,HTR2B,IGF1,IL1A,IL1B,IL10,MAOB,MXI1,OSM,RB1,CCL3,SCG5,SLC2A1,SNCA,SYK,SYT1,TGFBR1,TLR2,TWIST1,WIPF1,WNT5A,SLC30A1,ZP3,AKAP1,HMGN3,RAB9A,KANK1,NCS1,CLEC4E,GREM1,RANGRF,PYCARD,TLR7,INPP5K,PID1,CRTAM,STXBP5
GOBPID	GO:0032879	0.014006	1.3234	64.6087	82	1235	regulation of localization	ABL2,BIN1,BCL6,BMP2,CD36,CD38,CD40,CDKN1A,CMKLR1,HBEGF,S1PR1,EDN1,LRRC32,HTR2B,ICAM1,IGF1,IL1A,IL1B,IL8,IL10,IRAK1,ITGAV,MAOB,MMP10,MPP1,MXI1,MYO5A,OSM,SERPINE1,PRKX,PTGS2,PTPN1,PTPRM,RAP2B,RB1,CCL3,SGK1,SCG5,SLC2A1,SLC11A1,SNAI1,SNCA,SYK,SYT1,TGFBR1,TIMP1,TLR2,TWIST1,VEGFA,VEGFB,WIPF1,WNT5A,SLC30A1,ZP3,AKAP1,PPAP2B,PKD2L1,HMGN3,RAB9A,NUPL1,MERTK,PDPN,EHD1,PLXND1,KANK1,NCS1,CLIC4,CLEC4E,GREM1,RAN…
GOBPID	GO:0043068	0.0140093	1.47202	30.4472	43	582	positive regulation of programmed cell death	ATM,BCL6,BMP2,CD38,CD40,CDKN1A,CLU,NQO1,DUSP1,DUSP6,IFI16,IL1B,IL2RA,IL10,IL18,MAP3K5,MNDA,MSH2,PLAGL2,PMAIP1,PPP3CC,PTGS2,PVRL2,CCL3,STAT5A,TGFBR1,TLR2,WNT5A,NR4A3,DYRK2,NCOA1,CRADD,TSC22D1,PHLDA1,ARHGEF18,NUPR1,HIPK2,PYCARD,IL19,G0S2,TNFRSF12A,GIMAP5,CRTAM
GOBPID	GO:0044270	0.0140735	1.47856	29.6101	42	566	cellular nitrogen compound catabolic process	AMPD3,BIN1,ARF4,RND3,ARHGAP5,ATP5D,BCL6,CAT,CD40,S1PR1,EIF2S3,GEM,GNA15,HTR2B,IDO1,MSH2,PNP,NT5E,NTHL1,OXA1L,RAB13,RGS16,UPP1,RAB7L1,KYNU,RAB9A,ENTPD4,ACAP1,DNAJB6,ARL4C,SPRY2,C6orf108,RASL10A,MRAS,RHOBTB3,KIF1B,RASGRP3,ARFGAP3,RASD1,GNL3L,ADAP2,AGAP4
GOBPID	GO:0001763	0.0140911	1.89797	9.46896	17	181	morphogenesis of a branching structure	ADM,BMP2,CTSZ,EDN1,HHEX,IGF1,IL10,CITED1,NFATC3,SRC,VEGFA,WNT5A,WNT6,SPRY2,SEMA3C,PLXND1,GREM1
GOBPID	GO:0000302	0.014102	2.19274	5.85925	12	112	response to reactive oxygen species	CAT,CD36,PLK3,DUSP1,FXN,IL18,MAP3K5,MT3,SERPINE1,SOD2,FBLN5,PPARGC1B
GOBPID	GO:0072522	0.014237	1.8227	10.9861	19	210	purine-containing compound biosynthetic process	ADCY7,ADM,ADORA3,AMPD3,ATIC,ATP1B1,ATP5D,EDN1,HTR2B,IMPDH2,MTHFD1,PNP,NT5E,PPAT,C16orf7,PAICS,ATP2C1,PID1,QTRT1
GOBPID	GO:0051253	0.0142759	1.40892	39.9161	54	763	negative regulation of RNA metabolic process	ASCL2,BACH1,BCL6,BMP2,CD36,CD38,CDKN1C,CEBPA,PLK3,DUSP5,EDN1,EREG,EZH2,BPTF,HHEX,HES1,IRF8,IFI16,IRAK1,CITED1,MT3,NAB2,NFIL3,PHB,RB1,RFX5,CCL3,SRSF7,SKIL,SNAI1,SUPT5H,TWIST1,WNT5A,ZNF189,ZP3,LRP8,CSDA,URI1,DNAJB6,TRIM28,WWP1,ZHX2,SIN3B,HEY1,GREM1,HIPK2,RASD1,INPP5K,TSHZ3,SETDB2,ARID5B,GLIS2,PPARGC1B,GLIS3
GOBPID	GO:0044093	0.0144947	1.34502	55.7675	72	1066	positive regulation of molecular function	ABL2,ADCY7,ADORA3,BIN1,ARHGAP5,BMP2,CAT,CD40,CLU,CYP27B1,S1PR1,EDN1,EREG,FLT3,FNTA,FXN,FZD2,GNA15,CXCL1,HES1,HTR2B,ICAM1,IGF1,IL1B,IL8,IL10,IRAK1,IRAK2,MAP3K5,MFNG,MSH2,MT3,NDP,PIK3CG,PMAIP1,PPP2R5B,RGS16,SDC4,SGK1,SLC11A1,SNCA,SSR1,SYK,TGFBR1,TLR2,TRAF5,TWIST1,VEGFA,WNT5A,ZP3,LRP8,PPAP2B,CDC16,HMGN3,HERPUD1,DNAJB6,UBA2,SPRY2,RASGRP3,PCOLCE2,GREM1,HIPK2,PYCARD,ANAPC5,ANAPC7,TERF2IP,TESC,ADAP2,SRP…
GOBPID	GO:0030888	0.0146526	2.96718	2.61574	7	50	regulation of B cell proliferation	ATM,BCL6,CD38,CD40,CDKN1A,IL10,MNDA
GOBPID	GO:0051130	0.0148615	1.54137	23.0185	34	440	positive regulation of cellular component organization	ABL2,BIN1,BMP2,CD36,EDN1,EPHB2,EREG,FXN,IDE,IGF1,IL1A,IL1B,ITGAV,PEBP1,SERPINE1,PMAIP1,PPP2R5B,RB1,SDC4,SKIL,SLC11A1,SNAI1,SNCA,SRC,TGFBR1,TWIST1,VEGFA,WNT5A,LRP8,MERTK,CDC42EP4,GREM1,NPTN,TNFRSF12A
GOBPID	GO:0051047	0.0149088	1.81307	11.0384	19	211	positive regulation of secretion	CD38,EDN1,HTR2B,IL1A,IL1B,IL10,CCL3,SNCA,SYK,TLR2,TWIST1,WNT5A,ZP3,RAB9A,NCS1,CLEC4E,PYCARD,CRTAM,STXBP5
GOBPID	GO:0007565	0.0149259	2.0319	7.32406	14	140	female pregnancy	ADM,CD38,CYP27B1,ACSL4,FKBP4,IL1B,IDO1,JUNB,PCSK5,PPAT,PTGS2,STAT5A,TGFBR1,TIMP1
GOBPID	GO:0033157	0.0149259	2.0319	7.32406	14	140	regulation of intracellular protein transport	CD36,CDKN1A,IGF1,IL1B,IL10,MXI1,TGFBR1,TLR2,WIPF1,AKAP1,KANK1,GREM1,TLR7,INPP5K
GOBPID	GO:0042770	0.0149259	2.0319	7.32406	14	140	signal transduction in response to DNA damage	ATM,ATR,CD44,CDKN1A,IFI16,MSH2,PMAIP1,SNAI1,TWIST1,DYRK2,CRADD,MAD2L2,HIPK2,SPRED2
GOBPID	GO:0055065	0.0149291	1.63146	17.3162	27	331	metal ion homeostasis	ABCB7,ADM,CD38,CD40,CYP27B1,S1PR1,EDN1,FXN,FZD2,GNA15,HTR2B,IL1B,MT1A,MT3,CCL1,CCL3,CCL15,CCL23,SLC8A3,SLC11A1,SNCA,SLC30A1,NPTN,ATP2C1,GIMAP5,TTC7A,HAMP
GOBPID	GO:0006096	0.0150143	2.70172	3.24351	8	62	glycolysis	GAPDH,IGF1,LDHA,PFKFB3,PFKP,TPI1,DDIT4,DHTKD1
GOBPID	GO:0045621	0.0150143	2.70172	3.24351	8	62	positive regulation of lymphocyte differentiation	CD80,HLX,IL2RA,PNP,STAT5A,SYK,VNN1,GIMAP5
GOBPID	GO:0097190	0.0152182	2.37074	4.55138	10	87	apoptotic signaling pathway	CLU,FXN,IGF1,LTBR,MCL1,PMAIP1,SOD2,SRC,TNFRSF12A,PARL
GOBPID	GO:0002440	0.0152791	2.25724	5.23147	11	100	production of molecular mediator of immune response	BCL6,CD36,CD40,GALNT2,IL10,MSH2,SLC11A1,TLR2,WNT5A,SWAP70,GIMAP5
GOBPID	GO:0002158	0.0152816	18.1605	0.209259	2	4	osteoclast proliferation	TNFAIP3,GREM1
GOBPID	GO:0002439	0.0152816	18.1605	0.209259	2	4	chronic inflammatory response to antigenic stimulus	IL1B,IL10
GOBPID	GO:0006991	0.0152816	18.1605	0.209259	2	4	response to sterol depletion	INSIG1,INSIG2
GOBPID	GO:0009128	0.0152816	18.1605	0.209259	2	4	purine nucleoside monophosphate catabolic process	AMPD3,NT5E
GOBPID	GO:0010193	0.0152816	18.1605	0.209259	2	4	response to ozone	IL1A,IL1B
GOBPID	GO:0014831	0.0152816	18.1605	0.209259	2	4	gastro-intestinal system smooth muscle contraction	HTR2B,SULF2
GOBPID	GO:0015691	0.0152816	18.1605	0.209259	2	4	cadmium ion transport	SLC11A1,SLC30A1
GOBPID	GO:0019511	0.0152816	18.1605	0.209259	2	4	peptidyl-proline hydroxylation	P4HA1,P4HA2
GOBPID	GO:0034116	0.0152816	18.1605	0.209259	2	4	positive regulation of heterotypic cell-cell adhesion	CD44,IL1B
GOBPID	GO:0034392	0.0152816	18.1605	0.209259	2	4	negative regulation of smooth muscle cell apoptotic process	EDN1,IGF1
GOBPID	GO:0044539	0.0152816	18.1605	0.209259	2	4	long-chain fatty acid import	CD36,ACSL1
GOBPID	GO:0045423	0.0152816	18.1605	0.209259	2	4	regulation of granulocyte macrophage colony-stimulating factor biosynthetic process	CD80,SYK
GOBPID	GO:0051045	0.0152816	18.1605	0.209259	2	4	negative regulation of membrane protein ectodomain proteolysis	IL10,TIMP1
GOBPID	GO:0061309	0.0152816	18.1605	0.209259	2	4	cardiac neural crest cell development involved in outflow tract morphogenesis	HES1,TWIST1
GOBPID	GO:0070487	0.0152816	18.1605	0.209259	2	4	monocyte aggregation	CD44,IL1B
GOBPID	GO:0070574	0.0152816	18.1605	0.209259	2	4	cadmium ion transmembrane transport	SLC11A1,SLC30A1
GOBPID	GO:0097084	0.0152816	18.1605	0.209259	2	4	vascular smooth muscle cell development	ADM,HES1
GOBPID	GO:2000121	0.0152816	18.1605	0.209259	2	4	regulation of removal of superoxide radicals	CD36,FBLN5
GOBPID	GO:2001243	0.0152816	18.1605	0.209259	2	4	negative regulation of intrinsic apoptotic signaling pathway	SRC,PARL
GOBPID	GO:0002720	0.0153514	4.85106	0.99398	4	19	positive regulation of cytokine production involved in immune response	CD36,TLR2,WNT5A,GIMAP5
GOBPID	GO:0031648	0.0153514	4.85106	0.99398	4	19	protein destabilization	BMP2,SNCA,ISOC2,CCDC88C
GOBPID	GO:0032731	0.0153514	4.85106	0.99398	4	19	positive regulation of interleukin-1 beta production	IL18,CCL3,WNT5A,PYCARD
GOBPID	GO:0042269	0.0153514	4.85106	0.99398	4	19	regulation of natural killer cell mediated cytotoxicity	PVRL2,STAT5A,GIMAP5,CRTAM
GOBPID	GO:0042474	0.0153514	4.85106	0.99398	4	19	middle ear morphogenesis	EDN1,INSIG1,NAGLU,INSIG2
GOBPID	GO:0045076	0.0153514	4.85106	0.99398	4	19	regulation of interleukin-2 biosynthetic process	CD80,IL1A,IL1B,STAT5A
GOBPID	GO:0070741	0.0153514	4.85106	0.99398	4	19	response to interleukin-6	CITED1,PHB,ST3GAL6,PID1
GOBPID	GO:2001242	0.0153514	4.85106	0.99398	4	19	regulation of intrinsic apoptotic signaling pathway	CLU,PMAIP1,SRC,PARL
GOBPID	GO:0007264	0.0154614	1.49912	26.4189	38	505	small GTPase mediated signal transduction	ARF4,RND3,ARHGAP5,BCL6,CDKN1A,GEM,IGF1,RAB13,RAP2B,RB1,SRC,BCAR3,RAB7L1,RAB9A,ARHGAP32,ARL4C,SPRY2,RASL10A,RAB40B,MRAS,RHOBTB3,KANK1,ARHGEF18,PSD4,CDC42EP4,RASGRP3,ARL5A,RASD1,ARHGAP17,ARHGAP20,RAB40C,RAP2C,SRPRB,RHOU,ARHGAP22,ARL6,RAB42,RASL11A
GOBPID	GO:0010740	0.0157915	1.60757	18.2055	28	348	positive regulation of intracellular protein kinase cascade	CD36,CD40,CD44,HBEGF,FLT3,HES1,HTR2B,IGF1,IL1A,IL1B,IRAK1,LTBR,MT3,OSM,PIK3CG,S100A12,CCL3,TGFBR1,TRAF5,VEGFA,VEGFB,WNT5A,ZP3,SPRY2,TRAF3IP2,ATP2C1,HIPK2,TERF2IP
GOBPID	GO:0002521	0.0158272	1.65665	15.799	25	302	leukocyte differentiation	ATM,BCL6,CD80,CEBPA,DOCK2,FLT3,HHEX,HLX,IFI16,IL2RA,IL10,JUNB,LYL1,MSH2,MT1G,PNP,CCL3,STAT5A,SYK,VEGFA,VNN1,BLNK,TESC,GIMAP5,PPARGC1B
GOBPID	GO:0000165	0.0159426	1.56598	20.6643	31	395	MAPK cascade	CD36,CD44,DUSP4,DUSP6,EDN1,FLT3,HTR2B,IGF1,IL1A,IL1B,IL18,IRAK1,IRAK2,ITGAV,LTBR,MAP3K5,MT3,OSM,PEBP1,CCL3,SYK,TIMP2,VEGFA,VEGFB,WNT5A,SPRY2,TNIP1,CAMKK2,RASGRP3,HIPK2,CNKSR3
GOBPID	GO:0046626	0.0161394	3.79244	1.51713	5	29	regulation of insulin receptor signaling pathway	IL1B,PTPN1,KANK1,INPP5K,PID1
GOBPID	GO:0010468	0.0161539	1.20806	170.284	195	3255	regulation of gene expression	PARP1,APEX1,ASCL2,BACH1,BCL6,BMP2,ZFP36L2,CAT,CCNE1,CD80,CD36,CD38,CD40,CDK4,CDKN1A,CDKN1C,CEBPA,CLU,CMKLR1,PLK3,DBP,DDX1,ARID3A,RCAN1,DUSP5,S1PR1,EDN1,EREG,ETS2,EZH2,BPTF,FLI1,FOSL2,FZD2,GAPDH,LRRC32,KAT2A,NR3C1,GTF2F2,HHEX,HES1,ICAM1,IRF8,IFI16,IGF1,IL1B,IL10,IL16,IL18,INSIG1,IRAK1,IRAK2,JUNB,LYL1,MXD1,MNDA,CITED1,MT3,MTF1,MXI1,NAB2,NDP,NFATC3,NFIL3,OSM,SERPINE1,PHB,PLAGL2,PLAUR,PPP2R5B,RB1,RFX…
GOBPID	GO:0006084	0.016241	2.89953	2.66805	7	51	acetyl-CoA metabolic process	IDH2,PDK3,PDHX,KYNU,PMVK,NNT,DHTKD1
GOBPID	GO:2000377	0.016241	2.89953	2.66805	7	51	regulation of reactive oxygen species metabolic process	CD36,CDKN1A,IL18,MT3,SYK,FBLN5,PID1
GOBPID	GO:0042698	0.0163656	2.23199	5.28379	11	101	ovulation cycle	BMP2,CAT,CCNE1,EREG,ICAM1,MMP19,STAT5A,VEGFA,WNT5A,ZP3,NCOA1
GOBPID	GO:0043900	0.0163656	2.23199	5.28379	11	101	regulation of multi-organism process	AP2A2,AP1B1,CD36,DOCK2,IRF8,IL2RA,IL10,ITGAV,TIMP1,TLR2,TNFAIP3
GOBPID	GO:0060348	0.0163931	2.34017	4.6037	10	88	bone development	BMP2,IGF1,INSIG1,NAB2,TWIST1,GREM1,SBDS,INSIG2,SULF2,SH3PXD2B
GOBPID	GO:0048762	0.0165116	2.06612	6.69628	13	128	mesenchymal cell differentiation	BMP2,EDN1,HES1,HTR2B,PLAUR,SNAI1,TGFBR1,TWIST1,WNT5A,TRIM28,SEMA3C,HEY1,GREM1
GOBPID	GO:0030162	0.0167207	1.99985	7.42869	14	142	regulation of proteolysis	SERPINH1,CLU,PLK3,CLN8,HSP90AB1,IDE,IL1B,IL10,SERPINF1,SERPINA1,SERPINB9,PLAUR,TIMP1,MAD2L2
GOBPID	GO:0048754	0.0167207	1.99985	7.42869	14	142	branching morphogenesis of a tube	BMP2,CTSZ,EDN1,HHEX,IGF1,CITED1,NFATC3,SRC,VEGFA,WNT5A,WNT6,SPRY2,PLXND1,GREM1
GOBPID	GO:1901136	0.0167916	1.48152	27.4129	39	524	carbohydrate derivative catabolic process	AMPD3,BIN1,ARF4,RND3,ARHGAP5,ATP5D,BCL6,CD40,CHI3L2,S1PR1,EIF2S3,GEM,GNA15,HTR2B,MSH2,PNP,NT5E,NTHL1,RAB13,RGS16,UPP1,RAB7L1,RAB9A,ENTPD4,ACAP1,GNPDA1,ARL4C,SPRY2,RASL10A,MRAS,RHOBTB3,KIF1B,GPD1L,RASGRP3,ARFGAP3,RASD1,GNL3L,ADAP2,AGAP4
GOBPID	GO:0042110	0.016847	1.62912	16.6884	26	319	T cell activation	BCL6,CD80,CD48,MAP3K8,DOCK2,FLT3,LRRC32,HLX,HES1,ICAM1,IGF1,IL1B,IL2RA,IL10,IL18,PNP,PIK3CG,SLC11A1,SRC,STAT5A,SYK,ZP3,VNN1,EBI3,GIMAP5,PAG1
GOBPID	GO:0002260	0.0168625	3.21435	2.09259	6	40	lymphocyte homeostasis	IL2RA,PMAIP1,SKIL,STAT5A,TNFAIP3,GIMAP5
GOBPID	GO:0043271	0.0168625	3.21435	2.09259	6	40	negative regulation of ion transport	ICAM1,ITGAV,PTGS2,SLC30A1,NCS1,INPP5K
GOBPID	GO:0045768	0.0168625	3.21435	2.09259	6	40	positive regulation of anti-apoptosis	ADM,APEX1,CDKN1A,DUSP1,CITED1,BTG2
GOBPID	GO:0046637	0.0168625	3.21435	2.09259	6	40	regulation of alpha-beta T cell differentiation	BCL6,CD80,HLX,PNP,SYK,GIMAP5
GOBPID	GO:0045934	0.0168664	1.37773	43.7874	58	837	negative regulation of nucleobase-containing compound metabolic process	ASCL2,ATR,BACH1,BCL6,BMP2,CD36,CD38,CDKN1C,CEBPA,PLK3,DUSP5,EDN1,EREG,EZH2,BPTF,HHEX,HES1,IRF8,IFI16,IRAK1,CITED1,MSH2,MT3,NAB2,NFIL3,PHB,RB1,RFX5,CCL3,SRSF7,SKIL,SNAI1,SUPT5H,TWIST1,WNT5A,ZNF189,ZP3,LRP8,CSDA,URI1,DNAJB6,TRIM28,WWP1,ZHX2,SIN3B,HEY1,GREM1,HIPK2,RASD1,INPP5K,TERF2IP,PID1,TSHZ3,SETDB2,ARID5B,GLIS2,PPARGC1B,GLIS3
GOBPID	GO:0045892	0.0168762	1.40287	38.5559	52	737	negative regulation of transcription, DNA-dependent	ASCL2,BACH1,BCL6,BMP2,CD36,CD38,CDKN1C,CEBPA,PLK3,DUSP5,EDN1,EREG,EZH2,BPTF,HHEX,HES1,IRF8,IFI16,IRAK1,CITED1,MT3,NAB2,NFIL3,PHB,RB1,RFX5,SKIL,SNAI1,SUPT5H,TWIST1,WNT5A,ZNF189,ZP3,LRP8,CSDA,URI1,DNAJB6,TRIM28,WWP1,ZHX2,SIN3B,HEY1,GREM1,HIPK2,RASD1,INPP5K,TSHZ3,SETDB2,ARID5B,GLIS2,PPARGC1B,GLIS3
GOBPID	GO:0006596	0.0171604	6.81623	0.575462	3	11	polyamine biosynthetic process	ODC1,SRM,SMOX
GOBPID	GO:0006837	0.0171604	6.81623	0.575462	3	11	serotonin transport	MAOB,SNCA,SYK
GOBPID	GO:0008354	0.0171604	6.81623	0.575462	3	11	germ cell migration	TGFBR1,PPAP2A,PPAP2B
GOBPID	GO:0010818	0.0171604	6.81623	0.575462	3	11	T cell chemotaxis	PIK3CG,CCL3,WNT5A
GOBPID	GO:0032695	0.0171604	6.81623	0.575462	3	11	negative regulation of interleukin-12 production	CMKLR1,IL10,TLR2
GOBPID	GO:0043518	0.0171604	6.81623	0.575462	3	11	negative regulation of DNA damage response, signal transduction by p53 class mediator	CD44,SNAI1,TWIST1
GOBPID	GO:0045910	0.0171604	6.81623	0.575462	3	11	negative regulation of DNA recombination	BCL6,MSH2,TERF2IP
GOBPID	GO:0070977	0.0171604	6.81623	0.575462	3	11	bone maturation	BMP2,IGF1,GREM1
GOBPID	GO:0045944	0.0171773	1.44411	31.7027	44	606	positive regulation of transcription from RNA polymerase II promoter	BMP2,CD40,CEBPA,DBP,S1PR1,ETS2,GTF2F2,HHEX,HES1,IGF1,IL1B,INSIG1,JUNB,MT3,MTF1,NFATC3,OSM,RB1,SLC11A1,SS18,STAT5A,SUPT5H,TLR2,TWIST1,VEGFA,WNT5A,NCOA1,HMGN3,SRA1,TNIP1,GREM1,HIPK2,INSIG2,PID1,ARNTL2,CSRNP1,CSRNP2,EIF2A,GLIS2,C1orf85,PPARGC1B,NCOA7,CREB3L4,GLIS3
GOBPID	GO:2001141	0.0173556	1.21557	148.731	172	2843	regulation of RNA biosynthetic process	PARP1,APEX1,ASCL2,BACH1,BCL6,BMP2,ZFP36L2,CAT,CCNE1,CD80,CD36,CD38,CD40,CDKN1C,CEBPA,CLU,CMKLR1,PLK3,DBP,DDX1,ARID3A,RCAN1,DUSP5,S1PR1,EDN1,EREG,ETS2,EZH2,BPTF,FLI1,FOSL2,FZD2,KAT2A,NR3C1,GTF2F2,HHEX,HES1,ICAM1,IRF8,IFI16,IGF1,IL1B,IL10,IL16,INSIG1,IRAK1,IRAK2,JUNB,LYL1,MXD1,MNDA,CITED1,MT3,MTF1,MXI1,NAB2,NDP,NFATC3,NFIL3,OSM,PHB,PLAGL2,PPP2R5B,RB1,RFX5,CCL3,SGK1,SKIL,SLC11A1,HLTF,SNAI1,SOD2,SS18…
GOBPID	GO:0050870	0.0174592	1.88875	8.94582	16	171	positive regulation of T cell activation	CD80,MAP3K8,HLX,HES1,IGF1,IL1B,IL2RA,IL18,PNP,SRC,STAT5A,SYK,ZP3,VNN1,EBI3,GIMAP5
GOBPID	GO:0043412	0.0175452	1.22553	131.781	154	2519	macromolecule modification	ABL2,ADCY7,ADH5,PARP1,APEX1,ATM,ATR,BLMH,BMP2,CCNE1,CCNG1,CD80,CD36,CD40,CD44,CDK4,CDKN1A,CDKN1C,CISH,CLU,PLK3,MAP3K8,CSTA,DKC1,DUSP1,DUSP4,DUSP5,DUSP6,EDN1,EPHB2,EREG,EZH2,FKBP4,FLT3,FNTA,FXN,FYB,GALNT2,GAPDH,KAT2A,GNA15,HES1,HTR2B,IGF1,IL1B,IL8,IRAK1,IRAK2,MAP3K5,MT3,NTHL1,OSM,P4HA1,PEBP1,PDK3,PHB,PIK3CG,PLAUR,PPP2R5B,PRKX,PTPN1,PTPN2,PTPN4,PTPRM,RAP2B,RB1,CCL3,SDC4,SGK1,ST3GAL2,SLC11A1,HLTF,SN…
GOBPID	GO:0046700	0.0175624	1.46163	29.1916	41	558	heterocycle catabolic process	AMPD3,BIN1,ARF4,RND3,ARHGAP5,ATP5D,BCL6,CAT,CD40,S1PR1,EIF2S3,GEM,GNA15,HTR2B,IDO1,MSH2,PNP,NT5E,NTHL1,OXA1L,RAB13,RGS16,UPP1,RAB7L1,KYNU,RAB9A,ENTPD4,ACAP1,DNAJB6,ARL4C,SPRY2,RASL10A,MRAS,RHOBTB3,KIF1B,RASGRP3,ARFGAP3,RASD1,GNL3L,ADAP2,AGAP4
GOBPID	GO:0006355	0.0175952	1.21547	147.841	171	2826	regulation of transcription, DNA-dependent	PARP1,APEX1,ASCL2,BACH1,BCL6,BMP2,ZFP36L2,CAT,CCNE1,CD80,CD36,CD38,CD40,CDKN1C,CEBPA,CLU,CMKLR1,PLK3,DBP,DDX1,ARID3A,RCAN1,DUSP5,S1PR1,EDN1,EREG,ETS2,EZH2,BPTF,FLI1,FOSL2,FZD2,KAT2A,NR3C1,GTF2F2,HHEX,HES1,ICAM1,IRF8,IFI16,IGF1,IL1B,IL10,IL16,INSIG1,IRAK1,IRAK2,JUNB,LYL1,MXD1,MNDA,CITED1,MT3,MTF1,MXI1,NAB2,NDP,NFATC3,NFIL3,OSM,PHB,PLAGL2,PPP2R5B,RB1,RFX5,SGK1,SKIL,SLC11A1,HLTF,SNAI1,SOD2,SS18,STAT…
GOBPID	GO:0051171	0.0178398	1.20146	176.458	201	3373	regulation of nitrogen compound metabolic process	ADCY7,ADM,ADORA3,PARP1,BIN1,APEX1,ARHGAP5,ASCL2,ATR,BACH1,BCL6,BMP2,ZFP36L2,CAT,CCNE1,CD80,CD36,CD38,CD40,CDKN1A,CDKN1C,CEBPA,CLU,CMKLR1,PLK3,DBP,DDX1,NQO1,ARID3A,RCAN1,DUSP5,S1PR1,EDN1,EREG,ETS2,EZH2,BPTF,FLI1,FOSL2,FZD2,KAT2A,NR3C1,GTF2F2,HHEX,HES1,HSP90AB1,HTR2B,ICAM1,IRF8,IFI16,IGF1,IL1B,IL10,IL16,INSIG1,IRAK1,IRAK2,JUNB,LYL1,MXD1,MAOB,MNDA,CITED1,MSH2,MT3,MTF1,MXI1,NAB2,NDP,NFATC3,NFIL3,ODC1…
GOBPID	GO:0051289	0.0179476	2.83489	2.72037	7	52	protein homotetramerization	CAT,IDE,PFKP,PPAT,SHMT2,SOD2,EVL
GOBPID	GO:0070664	0.0179476	2.83489	2.72037	7	52	negative regulation of leukocyte proliferation	ATM,LRRC32,IL2RA,IL10,MNDA,TNFAIP3,GREM1
GOBPID	GO:0048660	0.0179522	2.60485	3.34814	8	64	regulation of smooth muscle cell proliferation	HBEGF,S1PR1,EDN1,EREG,IGF1,PTGS2,TNFAIP3,VEGFA
GOBPID	GO:0051701	0.0179522	2.60485	3.34814	8	64	interaction with host	ICAM1,ITGAV,PVRL2,TLR2,TNIP1,WWP1,HIPK2,TLR7
GOBPID	GO:0030154	0.018	1.22559	130.002	152	2485	cell differentiation	ABL2,ADM,AP2A2,BIN1,ASCL2,ATM,BCL6,BMP2,CCNE1,CD80,CD36,CDKN1C,CEBPA,CLU,VCAN,CSTA,CYP27B1,DNASE2,DOCK2,RCAN1,DUSP6,S1PR1,EDN1,EFNB2,EPHB2,CLN8,EREG,ACSL4,FKBP4,FLT3,FXN,FZD2,GSTM3,HHEX,HLX,HES1,HSP90AB1,HTR2B,IRF8,IFI16,IGF1,IL1A,IL2RA,IL10,IL18,INSIG1,ITGAV,JUNB,LAMC1,LTA4H,LYL1,MCL1,MGST1,MMP19,CITED1,MSH2,MT1G,MT3,MYH11,MYO5A,NAB2,NAGLU,NFATC3,PNP,PEBP1,SERPINF1,PLAUR,PMP22,PPP2R5B,PRKX,PTGS2…
GOBPID	GO:0042306	0.0182026	2.10778	6.06851	12	116	regulation of protein import into nucleus	CD36,CDKN1A,IGF1,IL1B,IL10,MXI1,TGFBR1,TLR2,AKAP1,KANK1,GREM1,TLR7
GOBPID	GO:1900180	0.0182026	2.10778	6.06851	12	116	regulation of protein localization to nucleus	CD36,CDKN1A,IGF1,IL1B,IL10,MXI1,TGFBR1,TLR2,AKAP1,KANK1,GREM1,TLR7
GOBPID	GO:0002715	0.0184126	4.54754	1.04629	4	20	regulation of natural killer cell mediated immunity	PVRL2,STAT5A,GIMAP5,CRTAM
GOBPID	GO:0032735	0.0184126	4.54754	1.04629	4	20	positive regulation of interleukin-12 production	CD36,CD40,IRF8,TLR2
GOBPID	GO:0042771	0.0184126	4.54754	1.04629	4	20	DNA damage response, signal transduction by p53 class mediator resulting in induction of apoptosis	IFI16,MSH2,DYRK2,HIPK2
GOBPID	GO:0043114	0.0184126	4.54754	1.04629	4	20	regulation of vascular permeability	ADM,IL18,SRC,VEGFA
GOBPID	GO:0045939	0.0184126	4.54754	1.04629	4	20	negative regulation of steroid metabolic process	BMP2,INSIG1,SNAI1,INSIG2
GOBPID	GO:0051354	0.0184126	4.54754	1.04629	4	20	negative regulation of oxidoreductase activity	CYP27B1,MT3,OXA1L,SNCA
GOBPID	GO:0071320	0.0184126	4.54754	1.04629	4	20	cellular response to cAMP	AQP9,IL18,SLC8A3,INPP5K
GOBPID	GO:0001910	0.018556	3.64048	1.56944	5	30	regulation of leukocyte mediated cytotoxicity	ICAM1,PVRL2,STAT5A,GIMAP5,CRTAM
GOBPID	GO:0002204	0.018556	3.64048	1.56944	5	30	somatic recombination of immunoglobulin genes involved in immune response	BCL6,CD40,IL10,MSH2,SWAP70
GOBPID	GO:0002208	0.018556	3.64048	1.56944	5	30	somatic diversification of immunoglobulins involved in immune response	BCL6,CD40,IL10,MSH2,SWAP70
GOBPID	GO:0045190	0.018556	3.64048	1.56944	5	30	isotype switching	BCL6,CD40,IL10,MSH2,SWAP70
GOBPID	GO:0046638	0.018556	3.64048	1.56944	5	30	positive regulation of alpha-beta T cell differentiation	CD80,HLX,PNP,SYK,GIMAP5
GOBPID	GO:1900076	0.018556	3.64048	1.56944	5	30	regulation of cellular response to insulin stimulus	IL1B,PTPN1,KANK1,INPP5K,PID1
GOBPID	GO:0016052	0.0185888	1.9184	8.26573	15	158	carbohydrate catabolic process	CD44,CHI3L2,GALT,GAPDH,GK,IGF1,LDHA,PFKFB3,PFKP,PGD,TPI1,HIBADH,DDIT4,ABHD10,DHTKD1
GOBPID	GO:0045453	0.0189059	3.12229	2.1449	6	41	bone resorption	CD38,SRC,SYK,TNFAIP3,VEGFA,PPARGC1B
GOBPID	GO:0031401	0.0190916	1.41067	35.3647	48	676	positive regulation of protein modification process	ADCY7,BMP2,CD80,CD36,CD40,CD44,CLU,EDN1,EREG,FLT3,FNTA,HES1,HTR2B,IGF1,IL1B,IL8,IRAK1,IRAK2,MAP3K5,MT3,OSM,PIK3CG,PPP2R5B,RAP2B,SDC4,SLC11A1,SNCA,SSR1,SYK,TGFBR1,VEGFA,VEGFB,WNT5A,ZP3,LRP8,PPAP2B,CDC16,HERPUD1,SPRY2,MAD2L2,GREM1,NPTN,ANAPC5,ANAPC7,RAP2C,SRPRB,FAM129A,NHLRC1
GOBPID	GO:0030168	0.0194774	1.75735	11.3523	19	217	platelet activation	CD36,CD40,CLU,F5,GNA15,IGF1,SERPINE1,SERPINA1,PIK3CG,PPBP,PTPN1,SRC,SYK,TIMP1,VEGFA,VEGFB,MERTK,PDPN,APBB1IP
GOBPID	GO:0007584	0.0195967	1.72823	12.137	20	232	response to nutrient	ABL2,BMP2,CAT,CCNE1,CD38,CEBPA,CYP27B1,DUSP1,ACSL4,FZD2,IL1A,IL1B,SERPINF1,PTGS2,SOD2,WNT5A,WNT6,NCOA1,KYNU,TESC
GOBPID	GO:0002285	0.0202556	2.37926	4.08055	9	78	lymphocyte activation involved in immune response	BCL6,CD80,CD40,HLX,ICAM1,IL10,MSH2,SLC11A1,SWAP70
GOBPID	GO:0030522	0.0203339	1.74839	11.4046	19	218	intracellular receptor mediated signaling pathway	CCNE1,CYP27B1,EZH2,FKBP4,NR3C1,HSP90AB1,IGF1,IRAK1,IRAK2,PHB,RB1,SRC,TNFAIP3,TWIST1,PPAP2A,NCOA1,PYCARD,C1orf85,PPARGC1B
GOBPID	GO:0009165	0.0204223	1.69515	12.9741	21	248	nucleotide biosynthetic process	ADCY7,ADM,ADORA3,AMPD3,ATIC,ATP1B1,ATP5D,EDN1,HTR2B,IMPDH2,MTHFD1,PNP,NT5E,PPAT,UPP1,KYNU,C16orf7,NAMPT,PAICS,ATP2C1,PID1
GOBPID	GO:0009612	0.0205602	2.06771	6.17314	12	118	response to mechanical stimulus	BMP2,CASP5,CD40,RCAN1,IL1B,IL18,JUNB,LTBR,TLR5,BTG2,CRADD,TLR7
GOBPID	GO:0014031	0.0205602	2.06771	6.17314	12	118	mesenchymal cell development	BMP2,EDN1,HES1,HTR2B,SNAI1,TGFBR1,TWIST1,WNT5A,TRIM28,SEMA3C,HEY1,GREM1
GOBPID	GO:0030100	0.0205602	2.06771	6.17314	12	118	regulation of endocytosis	ABL2,BIN1,CD36,ITGAV,SERPINE1,PTPN1,SLC11A1,SNCA,SYK,VEGFA,MERTK,GREM1
GOBPID	GO:0048869	0.02092	1.21341	138.163	160	2641	cellular developmental process	ABL2,ADM,AP2A2,BIN1,ASCL2,ATM,BCL6,BMP2,CCNE1,CD80,CD36,CDKN1C,CEBPA,CLU,VCAN,CSTA,CYP27B1,DNASE2,DOCK2,RCAN1,DUSP6,S1PR1,EDN1,EFNB2,EPHB2,CLN8,EREG,ACSL4,FKBP4,FLT3,FXN,FZD2,GSTM3,HHEX,HLX,HES1,HSP90AB1,HTR2B,ICAM1,IRF8,IFI16,IGF1,IL1A,IL2RA,IL10,IL18,INSIG1,ITGAV,JUNB,LAMC1,LTA4H,LYL1,MCL1,MGST1,MMP19,CITED1,MSH2,MT1G,MT3,MYH11,MYO5A,NAB2,NAGLU,NFATC3,PNP,PEBP1,SERPINF1,PLAUR,PMP22,PPP2R5B,PRKX…
GOBPID	GO:0009060	0.0211121	3.03533	2.19722	6	42	aerobic respiration	CAT,FXN,IDH2,OXA1L,NNT,DHTKD1
GOBPID	GO:0031577	0.0211121	3.03533	2.19722	6	42	spindle checkpoint	ATM,CDC16,MAD2L2,ANAPC5,ANAPC7,CDK5RAP2
GOBPID	GO:0009119	0.0212762	1.50543	22.8092	33	436	ribonucleoside metabolic process	AK4,BIN1,ARF4,RND3,ARHGAP5,BCL6,CD40,S1PR1,EIF2S3,GEM,GNA15,HTR2B,IMPDH2,PNP,NT5E,RAB13,RGS16,UPP1,RAB7L1,RAB9A,ENTPD4,ACAP1,ARL4C,SPRY2,RASL10A,MRAS,RASGRP3,ARFGAP3,RASD1,GNL3L,ADAP2,QTRT1,AGAP4
GOBPID	GO:0006464	0.0212782	1.21999	126.916	148	2426	cellular protein modification process	ABL2,ADCY7,ADH5,PARP1,ATM,ATR,BLMH,BMP2,CCNE1,CCNG1,CD80,CD36,CD40,CD44,CDK4,CDKN1A,CDKN1C,CISH,CLU,PLK3,MAP3K8,CSTA,DUSP1,DUSP4,DUSP5,DUSP6,EDN1,EPHB2,EREG,EZH2,FKBP4,FLT3,FNTA,FXN,FYB,GALNT2,GAPDH,KAT2A,GNA15,HES1,HTR2B,IGF1,IL1B,IL8,IRAK1,IRAK2,MAP3K5,MT3,OSM,P4HA1,PEBP1,PDK3,PHB,PIK3CG,PLAUR,PPP2R5B,PRKX,PTPN1,PTPN2,PTPN4,PTPRM,RAP2B,RB1,CCL3,SDC4,SGK1,ST3GAL2,SLC11A1,HLTF,SNCA,SRC,SSR1,STAT5…
GOBPID	GO:0036211	0.0212782	1.21999	126.916	148	2426	protein modification process	ABL2,ADCY7,ADH5,PARP1,ATM,ATR,BLMH,BMP2,CCNE1,CCNG1,CD80,CD36,CD40,CD44,CDK4,CDKN1A,CDKN1C,CISH,CLU,PLK3,MAP3K8,CSTA,DUSP1,DUSP4,DUSP5,DUSP6,EDN1,EPHB2,EREG,EZH2,FKBP4,FLT3,FNTA,FXN,FYB,GALNT2,GAPDH,KAT2A,GNA15,HES1,HTR2B,IGF1,IL1B,IL8,IRAK1,IRAK2,MAP3K5,MT3,OSM,P4HA1,PEBP1,PDK3,PHB,PIK3CG,PLAUR,PPP2R5B,PRKX,PTPN1,PTPN2,PTPN4,PTPRM,RAP2B,RB1,CCL3,SDC4,SGK1,ST3GAL2,SLC11A1,HLTF,SNCA,SRC,SSR1,STAT5…
GOBPID	GO:0035821	0.0212807	2.51466	3.45277	8	66	modification of morphology or physiology of other organism	ITGAV,S100A12,CCL3,TLR2,TNIP1,TLR7,INPP5K,HAMP
GOBPID	GO:0019318	0.0212833	1.71183	12.2416	20	234	hexose metabolic process	SLC37A4,GALK2,GALT,GAPDH,GBE1,IGF1,LDHA,PDK3,PFKFB3,PFKP,PGD,PMAIP1,RENBP,TPI1,DYRK2,HIBADH,CHST15,INPP5K,DDIT4,DHTKD1
GOBPID	GO:0002703	0.0217714	2.22537	4.81295	10	92	regulation of leukocyte mediated immunity	BCL6,CD40,IL1B,IL10,PVRL2,STAT5A,SYK,ZP3,GIMAP5,CRTAM
GOBPID	GO:0008629	0.0217714	2.22537	4.81295	10	92	induction of apoptosis by intracellular signals	ATM,CDKN1A,CLU,IFI16,MAP3K5,MSH2,PMAIP1,PPP3CC,DYRK2,HIPK2
GOBPID	GO:0022602	0.0217714	2.22537	4.81295	10	92	ovulation cycle process	CAT,CCNE1,EREG,ICAM1,MMP19,STAT5A,VEGFA,WNT5A,ZP3,NCOA1
GOBPID	GO:0003300	0.0218264	4.27973	1.09861	4	21	cardiac muscle hypertrophy	EDN1,HTR2B,IGF1,AKAP1
GOBPID	GO:0014897	0.0218264	4.27973	1.09861	4	21	striated muscle hypertrophy	EDN1,HTR2B,IGF1,AKAP1
GOBPID	GO:0032845	0.0218264	4.27973	1.09861	4	21	negative regulation of homeostatic process	CD38,TNFAIP3,VEGFA,TERF2IP
GOBPID	GO:0033687	0.0218264	4.27973	1.09861	4	21	osteoblast proliferation	BMP2,ITGAV,JUNB,GREM1
GOBPID	GO:0042346	0.0218264	4.27973	1.09861	4	21	positive regulation of NF-kappaB import into nucleus	IL1B,TLR2,GREM1,TLR7
GOBPID	GO:0010243	0.0220031	1.97931	6.95786	13	133	response to organic nitrogen	CCNE1,CCNG1,CDKN1A,EDN1,ICAM1,IL1A,IL1B,MGST1,MSH2,PEBP1,PTGS2,SNCA,BTG2
GOBPID	GO:0001660	0.0220057	6.05843	0.627777	3	12	fever generation	IL1A,IL1B,PTGS2
GOBPID	GO:0003203	0.0220057	6.05843	0.627777	3	12	endocardial cushion morphogenesis	BMP2,TWIST1,HEY1
GOBPID	GO:0006098	0.0220057	6.05843	0.627777	3	12	pentose-phosphate shunt	PGD,TPI1,HIBADH
GOBPID	GO:0018198	0.0220057	6.05843	0.627777	3	12	peptidyl-cysteine modification	ADH5,GAPDH,ZDHHC7
GOBPID	GO:0051767	0.0220057	6.05843	0.627777	3	12	nitric-oxide synthase biosynthetic process	EDN1,TLR2,NAMPT
GOBPID	GO:0051769	0.0220057	6.05843	0.627777	3	12	regulation of nitric-oxide synthase biosynthetic process	EDN1,TLR2,NAMPT
GOBPID	GO:0060055	0.0220057	6.05843	0.627777	3	12	angiogenesis involved in wound healing	SERPINE1,TNFAIP3,VEGFB
GOBPID	GO:0071621	0.0220057	6.05843	0.627777	3	12	granulocyte chemotaxis	CMKLR1,CCL3,EMR2
GOBPID	GO:0009890	0.0223812	1.33995	48.0249	62	918	negative regulation of biosynthetic process	ASCL2,ATR,BACH1,BCL6,BMP2,CD36,CD38,CDKN1C,CEBPA,PLK3,HBEGF,DUSP5,EDN1,EREG,EZH2,BPTF,HHEX,HES1,IRF8,IFI16,IL10,INSIG1,IRAK1,ITGAV,CITED1,MT3,NAB2,NFIL3,PHB,RB1,RFX5,CCL3,SKIL,SNAI1,SUPT5H,TWIST1,WNT5A,ZNF189,ZP3,LRP8,CSDA,URI1,DNAJB6,TRIM28,WWP1,ZHX2,SIN3B,HEY1,GREM1,HIPK2,INSIG2,RASD1,INPP5K,PID1,GIMAP5,TSHZ3,SETDB2,ARID5B,GLIS2,PPARGC1B,GLIS3,EIF2AK4
GOBPID	GO:0051252	0.0225792	1.20245	151.765	174	2901	regulation of RNA metabolic process	PARP1,APEX1,ASCL2,BACH1,BCL6,BMP2,ZFP36L2,CAT,CCNE1,CD80,CD36,CD38,CD40,CDKN1C,CEBPA,CLU,CMKLR1,PLK3,DBP,DDX1,ARID3A,RCAN1,DUSP5,S1PR1,EDN1,EREG,ETS2,EZH2,BPTF,FLI1,FOSL2,FZD2,KAT2A,NR3C1,GTF2F2,HHEX,HES1,ICAM1,IRF8,IFI16,IGF1,IL1B,IL10,IL16,INSIG1,IRAK1,IRAK2,JUNB,LYL1,MXD1,MNDA,CITED1,MT3,MTF1,MXI1,NAB2,NDP,NFATC3,NFIL3,OSM,PHB,PLAGL2,PPP2R5B,RB1,RFX5,CCL3,SRSF7,SGK1,SKIL,SLC11A1,HLTF,SNAI1,SOD…
GOBPID	GO:0031214	0.0226832	2.11374	5.54536	11	106	biomineral tissue development	BMP2,CYP27B1,IGF1,PTGS2,CCL3,TWIST1,WNT6,GREM1,SBDS,ANKH,FAM20C
GOBPID	GO:0043410	0.0227603	1.86565	8.47498	15	162	positive regulation of MAPK cascade	CD36,CD44,FLT3,IGF1,IL1A,IL1B,LTBR,MT3,OSM,CCL3,VEGFA,VEGFB,WNT5A,SPRY2,HIPK2
GOBPID	GO:0048659	0.023099	2.47186	3.50509	8	67	smooth muscle cell proliferation	HBEGF,S1PR1,EDN1,EREG,IGF1,PTGS2,TNFAIP3,VEGFA
GOBPID	GO:0031327	0.0232802	1.33979	47.2402	61	903	negative regulation of cellular biosynthetic process	ASCL2,ATR,BACH1,BCL6,BMP2,CD36,CD38,CDKN1C,CEBPA,PLK3,HBEGF,DUSP5,EDN1,EREG,EZH2,BPTF,HHEX,HES1,IRF8,IFI16,IL10,INSIG1,IRAK1,CITED1,MT3,NAB2,NFIL3,PHB,RB1,RFX5,CCL3,SKIL,SNAI1,SUPT5H,TWIST1,WNT5A,ZNF189,ZP3,LRP8,CSDA,URI1,DNAJB6,TRIM28,WWP1,ZHX2,SIN3B,HEY1,GREM1,HIPK2,INSIG2,RASD1,INPP5K,PID1,GIMAP5,TSHZ3,SETDB2,ARID5B,GLIS2,PPARGC1B,GLIS3,EIF2AK4
GOBPID	GO:0043122	0.0233536	1.81756	9.25971	16	177	regulation of I-kappaB kinase/NF-kappaB cascade	CD36,CD40,HTR2B,IL1A,IL1B,IL10,IRAK1,LTBR,S100A12,TNFAIP3,TRAF5,TNIP1,TRAF3IP2,ATP2C1,TERF2IP,TNIP3
GOBPID	GO:0030071	0.023486	2.95308	2.24953	6	43	regulation of mitotic metaphase/anaphase transition	ATM,RB1,CDC16,MAD2L2,ANAPC5,ANAPC7
GOBPID	GO:0033627	0.023486	2.95308	2.24953	6	43	cell adhesion mediated by integrin	ICAM1,SERPINE1,PIK3CG,SYK,WNT5A,TESC
GOBPID	GO:0030282	0.0235084	2.31189	4.18518	9	80	bone mineralization	BMP2,CYP27B1,IGF1,PTGS2,CCL3,TWIST1,GREM1,SBDS,ANKH
GOBPID	GO:2000112	0.0237631	1.19646	159.612	182	3051	regulation of cellular macromolecule biosynthetic process	PARP1,APEX1,ASCL2,ATR,BACH1,BCL6,BMP2,ZFP36L2,CAT,CCNE1,CD80,CD36,CD38,CD40,CDKN1A,CDKN1C,CEBPA,CLU,CMKLR1,PLK3,DBP,DDX1,ARID3A,RCAN1,HBEGF,DUSP5,S1PR1,EDN1,EREG,ETS2,EZH2,BPTF,FLI1,FOSL2,FZD2,KAT2A,NR3C1,GTF2F2,HHEX,HES1,ICAM1,IRF8,IFI16,IGF1,IL1B,IL10,IL16,INSIG1,IRAK1,IRAK2,JUNB,LYL1,MXD1,MNDA,CITED1,MT3,MTF1,MXI1,NAB2,NDP,NFATC3,NFIL3,OSM,PHB,PLAGL2,PPP2R5B,RB1,RFX5,SGK1,SKIL,SLC11A1,HLTF,SNA…
GOBPID	GO:0001824	0.0238163	2.65713	2.87731	7	55	blastocyst development	JUNB,SKIL,TGFBR1,ZP3,PRPF19,SBDS,CCNB1IP1
GOBPID	GO:0046849	0.0238163	2.65713	2.87731	7	55	bone remodeling	CD38,SRC,SYK,TNFAIP3,VEGFA,GREM1,PPARGC1B
GOBPID	GO:0009792	0.0238454	1.48115	23.8555	34	456	embryo development ending in birth or egg hatching	ADM,ASCL2,ATM,BMP2,CEBPA,EDN1,ACSL4,FXN,KAT2A,HHEX,HES1,IL10,JUNB,MSH2,PCSK5,SKIL,SNAI1,TGFBR1,TWIST1,VEGFA,WNT5A,SLC30A1,ZP3,CSDA,DNAJB6,SEMA3C,DEAF1,TANC2,PRPF19,SBDS,ENAH,SULF2,TSHZ3,CCNB1IP1
GOBPID	GO:0051348	0.0239053	1.85291	8.5273	15	163	negative regulation of transferase activity	CDKN1A,CDKN1C,DUSP1,DUSP4,DUSP5,DUSP6,CLN8,IL1B,RB1,TNFAIP3,SPRY2,NPRL2,INPP5K,PIF1,SPRED2
GOBPID	GO:0002889	0.024076	3.37032	1.67407	5	32	regulation of immunoglobulin mediated immune response	BCL6,CD40,IL10,PVRL2,GIMAP5
GOBPID	GO:0032651	0.024076	3.37032	1.67407	5	32	regulation of interleukin-1 beta production	IL18,CCL3,TNFAIP3,WNT5A,PYCARD
GOBPID	GO:0032760	0.024076	3.37032	1.67407	5	32	positive regulation of tumor necrosis factor production	CD36,IL18,CCL3,TLR2,TWIST1
GOBPID	GO:0045921	0.024076	3.37032	1.67407	5	32	positive regulation of exocytosis	SYK,ZP3,RAB9A,NCS1,STXBP5
GOBPID	GO:1901071	0.024076	3.37032	1.67407	5	32	glucosamine-containing compound metabolic process	CHI3L2,RENBP,CHST2,GNPDA1,NAGK
GOBPID	GO:0030003	0.0241065	1.558	18.0486	27	345	cellular cation homeostasis	ABCB7,ADM,CD38,CD40,S1PR1,EDN1,FXN,FZD2,GNA15,HTR2B,IL1B,MT1A,MT2A,MT3,CCL1,CCL3,CCL15,CCL23,SLC8A3,SLC11A1,SNCA,SLC30A1,NPTN,ATP2C1,GIMAP5,TTC7A,HAMP
GOBPID	GO:0001558	0.0242654	1.62139	14.8051	23	283	regulation of cell growth	BCL6,CD38,CDKN1A,CISH,CYP27B1,HBEGF,ACSL4,FXN,MT3,PHB,RB1,SGK1,TGFBR1,WNT5A,URI1,SOCS2,MAD2L2,C6orf108,ABTB2,GREM1,CRIM1,TNFRSF12A,NOL8
GOBPID	GO:0032502	0.0243392	1.17573	220.35	245	4212	developmental process	ABL2,ADH5,ADM,AP2A2,ALDH3A2,BIN1,ARF4,ARVCF,ASCL2,ATIC,ATM,ATR,BCL6,BMP2,CAT,CCNE1,CCNG1,CD80,CD36,CD40,CD44,CDKN1A,CDKN1C,CEBPA,CLU,CMKLR1,VCAN,CSTA,CTSZ,CYP27B1,DDX1,DNASE2,DOCK2,RCAN1,HBEGF,DUSP1,DUSP4,DUSP5,DUSP6,S1PR1,EDN1,PHC2,EFNB2,EPHB2,CLN8,EREG,ETS2,ACSL4,BPTF,FKBP4,FLI1,FLT3,FXN,FZD2,KAT2A,GJB2,CXCL1,GSTM3,HHEX,HLX,HES1,HSD11B1,HSP90AB1,HTR2B,ICAM1,IRF8,IDE,IFI16,IGF1,IL1A,IL1B,IL2RA,I…
GOBPID	GO:0002238	0.0245912	12.1061	0.261574	2	5	response to molecule of fungal origin	SYK,TLR2
GOBPID	GO:0006686	0.0245912	12.1061	0.261574	2	5	sphingomyelin biosynthetic process	SAMD8,SGMS2
GOBPID	GO:0032486	0.0245912	12.1061	0.261574	2	5	Rap protein signal transduction	RAP2B,RAP2C
GOBPID	GO:0032493	0.0245912	12.1061	0.261574	2	5	response to bacterial lipoprotein	CD36,TLR2
GOBPID	GO:0032725	0.0245912	12.1061	0.261574	2	5	positive regulation of granulocyte macrophage colony-stimulating factor production	IL1B,IL18
GOBPID	GO:0038083	0.0245912	12.1061	0.261574	2	5	peptidyl-tyrosine autophosphorylation	VEGFA,GREM1
GOBPID	GO:0042373	0.0245912	12.1061	0.261574	2	5	vitamin K metabolic process	CBR1,CBR3
GOBPID	GO:0043117	0.0245912	12.1061	0.261574	2	5	positive regulation of vascular permeability	IL18,VEGFA
GOBPID	GO:0045349	0.0245912	12.1061	0.261574	2	5	interferon-alpha biosynthetic process	IL10,TLR7
GOBPID	GO:0045354	0.0245912	12.1061	0.261574	2	5	regulation of interferon-alpha biosynthetic process	IL10,TLR7
GOBPID	GO:0045627	0.0245912	12.1061	0.261574	2	5	positive regulation of T-helper 1 cell differentiation	CD80,HLX
GOBPID	GO:0052552	0.0245912	12.1061	0.261574	2	5	modulation by organism of immune response of other organism involved in symbiotic interaction	TLR2,TLR7
GOBPID	GO:0052553	0.0245912	12.1061	0.261574	2	5	modulation by symbiont of host immune response	TLR2,TLR7
GOBPID	GO:0052555	0.0245912	12.1061	0.261574	2	5	positive regulation by organism of immune response of other organism involved in symbiotic interaction	TLR2,TLR7
GOBPID	GO:0052556	0.0245912	12.1061	0.261574	2	5	positive regulation by symbiont of host immune response	TLR2,TLR7
GOBPID	GO:0060666	0.0245912	12.1061	0.261574	2	5	dichotomous subdivision of terminal units involved in salivary gland branching	SEMA3C,PLXND1
GOBPID	GO:0060753	0.0245912	12.1061	0.261574	2	5	regulation of mast cell chemotaxis	VEGFA,VEGFB
GOBPID	GO:0060754	0.0245912	12.1061	0.261574	2	5	positive regulation of mast cell chemotaxis	VEGFA,VEGFB
GOBPID	GO:0061308	0.0245912	12.1061	0.261574	2	5	cardiac neural crest cell development involved in heart development	HES1,TWIST1
GOBPID	GO:0070339	0.0245912	12.1061	0.261574	2	5	response to bacterial lipopeptide	CD36,TLR2
GOBPID	GO:0071220	0.0245912	12.1061	0.261574	2	5	cellular response to bacterial lipoprotein	CD36,TLR2
GOBPID	GO:0071221	0.0245912	12.1061	0.261574	2	5	cellular response to bacterial lipopeptide	CD36,TLR2
GOBPID	GO:0071280	0.0245912	12.1061	0.261574	2	5	cellular response to copper ion	MT1G,SNCA
GOBPID	GO:0071361	0.0245912	12.1061	0.261574	2	5	cellular response to ethanol	ADCY7,SOD2
GOBPID	GO:0071605	0.0245912	12.1061	0.261574	2	5	monocyte chemotactic protein-1 production	IL1B,TWIST1
GOBPID	GO:0071637	0.0245912	12.1061	0.261574	2	5	regulation of monocyte chemotactic protein-1 production	IL1B,TWIST1
GOBPID	GO:0097306	0.0245912	12.1061	0.261574	2	5	cellular response to alcohol	ADCY7,SOD2
GOBPID	GO:1900407	0.0245912	12.1061	0.261574	2	5	regulation of cellular response to oxidative stress	CD36,FBLN5
GOBPID	GO:1901031	0.0245912	12.1061	0.261574	2	5	regulation of response to reactive oxygen species	CD36,FBLN5
GOBPID	GO:0007169	0.0246117	1.41193	31.5981	43	604	transmembrane receptor protein tyrosine kinase signaling pathway	ADCY7,AP2A2,ARF4,BMP2,CISH,HBEGF,DUSP4,DUSP6,EFNB2,EPHB2,EREG,FLT3,HHEX,IDE,IGF1,IL1B,IRAK1,MT3,PCSK5,PPP2R5B,PTPN1,PTPN2,SNCA,SRC,SS18,STAT5A,VEGFA,VEGFB,WNT5A,SOCS2,MTSS1,SPRY2,KANK1,ARHGEF18,NPTN,BLNK,CRIM1,INPP5K,PID1,PAG1,SULF2,CSRNP1,ARID5B
GOBPID	GO:0010558	0.024656	1.34474	44.7291	58	855	negative regulation of macromolecule biosynthetic process	ASCL2,ATR,BACH1,BCL6,BMP2,CD36,CD38,CDKN1C,CEBPA,PLK3,HBEGF,DUSP5,EDN1,EREG,EZH2,BPTF,HHEX,HES1,IRF8,IFI16,IL10,IRAK1,ITGAV,CITED1,MT3,NAB2,NFIL3,PHB,RB1,RFX5,SKIL,SNAI1,SUPT5H,TWIST1,WNT5A,ZNF189,ZP3,LRP8,CSDA,URI1,DNAJB6,TRIM28,WWP1,ZHX2,SIN3B,HEY1,GREM1,HIPK2,RASD1,INPP5K,PID1,TSHZ3,SETDB2,ARID5B,GLIS2,PPARGC1B,GLIS3,EIF2AK4
GOBPID	GO:0071346	0.0248952	2.17206	4.91758	10	94	cellular response to interferon-gamma	CD44,HSP90AB1,ICAM1,IRF8,IL18,MT2A,PTPN1,PTPN2,CCL3,WNT5A
GOBPID	GO:0001837	0.0250239	2.43048	3.5574	8	68	epithelial to mesenchymal transition	BMP2,SNAI1,TGFBR1,TWIST1,WNT5A,TRIM28,HEY1,GREM1
GOBPID	GO:0043524	0.0252673	2.27962	4.23749	9	81	negative regulation of neuron apoptotic process	CITED1,MSH2,MT3,LGMN,SNCA,SOD2,VEGFB,NR4A3,HIPK2
GOBPID	GO:1901215	0.0252673	2.27962	4.23749	9	81	negative regulation of neuron death	CITED1,MSH2,MT3,LGMN,SNCA,SOD2,VEGFB,NR4A3,HIPK2
GOBPID	GO:0010629	0.025596	1.34842	43.055	56	823	negative regulation of gene expression	ASCL2,BACH1,BCL6,BMP2,CD36,CD38,CDKN1A,CDKN1C,CEBPA,PLK3,DUSP5,EDN1,EREG,EZH2,BPTF,HHEX,HES1,IRF8,IFI16,IRAK1,CITED1,MT3,NAB2,NFIL3,PHB,PLAUR,RB1,RFX5,CCL3,SKIL,SNAI1,SUPT5H,TWIST1,VEGFB,WNT5A,ZNF189,ZP3,LRP8,CSDA,URI1,DNAJB6,TRIM28,WWP1,ZHX2,SIN3B,HEY1,GREM1,HIPK2,RASD1,INPP5K,TSHZ3,SETDB2,ARID5B,GLIS2,PPARGC1B,GLIS3
GOBPID	GO:0000083	0.0256016	4.04167	1.15092	4	22	regulation of transcription involved in G1/S phase of mitotic cell cycle	BACH1,CCNE1,RB1,CCNA1
GOBPID	GO:0010573	0.0256016	4.04167	1.15092	4	22	vascular endothelial growth factor production	IL1A,IL1B,PTGS2,SULF2
GOBPID	GO:0010574	0.0256016	4.04167	1.15092	4	22	regulation of vascular endothelial growth factor production	IL1A,IL1B,PTGS2,SULF2
GOBPID	GO:0032732	0.0256016	4.04167	1.15092	4	22	positive regulation of interleukin-1 production	IL18,CCL3,WNT5A,PYCARD
GOBPID	GO:0006195	0.025649	1.45494	25.6865	36	491	purine nucleotide catabolic process	AMPD3,BIN1,ARF4,RND3,ARHGAP5,ATP5D,BCL6,CAT,CD40,S1PR1,EIF2S3,GEM,GNA15,HTR2B,MSH2,PNP,NT5E,OXA1L,RAB13,RGS16,RAB7L1,RAB9A,ACAP1,DNAJB6,ARL4C,SPRY2,RASL10A,MRAS,RHOBTB3,KIF1B,RASGRP3,ARFGAP3,RASD1,GNL3L,ADAP2,AGAP4
GOBPID	GO:0019216	0.0259392	1.75689	10.1491	17	194	regulation of lipid metabolic process	BMP2,ACSL1,FLT3,IL1A,IL1B,INSIG1,PTGS2,RB1,SNAI1,SNCA,STAT5A,TWIST1,ZP3,PPAP2A,INSIG2,GIMAP5,MID1IP1
GOBPID	GO:0001836	0.0260324	2.87516	2.30185	6	44	release of cytochrome c from mitochondria	CLU,FXN,IGF1,PMAIP1,SOD2,PARL
GOBPID	GO:0002705	0.0260324	2.87516	2.30185	6	44	positive regulation of leukocyte mediated immunity	IL1B,PVRL2,STAT5A,ZP3,GIMAP5,CRTAM
GOBPID	GO:0002708	0.0260324	2.87516	2.30185	6	44	positive regulation of lymphocyte mediated immunity	IL1B,PVRL2,STAT5A,ZP3,GIMAP5,CRTAM
GOBPID	GO:0071347	0.0260324	2.87516	2.30185	6	44	cellular response to interleukin-1	EDN1,ICAM1,IL8,IRAK1,IRAK2,CCL3
GOBPID	GO:2001022	0.0260324	2.87516	2.30185	6	44	positive regulation of response to DNA damage stimulus	APEX1,ATM,ATR,PMAIP1,TRIM28,SPRED2
GOBPID	GO:2000242	0.0260348	2.60271	2.92962	7	56	negative regulation of reproductive process	SERPINF1,CCL3,TIMP1,WNT5A,ZP3,TNIP1,INPP5K
GOBPID	GO:0009261	0.0267632	1.47524	23.2277	33	444	ribonucleotide catabolic process	AMPD3,BIN1,ARF4,RND3,ARHGAP5,ATP5D,BCL6,CD40,S1PR1,EIF2S3,GEM,GNA15,HTR2B,MSH2,NT5E,RAB13,RGS16,RAB7L1,RAB9A,ENTPD4,ACAP1,ARL4C,SPRY2,RASL10A,MRAS,RHOBTB3,KIF1B,RASGRP3,ARFGAP3,RASD1,GNL3L,ADAP2,AGAP4
GOBPID	GO:0051649	0.0269365	1.24474	87.6795	105	1676	establishment of localization in cell	ADM,AP2A2,AP1B1,ATP5D,BCL6,CD36,CD38,CD40,CDKN1A,CLU,EDN1,F5,FYB,LRRC32,HHEX,HES1,HTR2B,IGF1,IL1A,IL1B,IL10,LRMP,LTBP2,MAOB,CITED1,MT3,MXI1,MYO5A,PNP,OSM,SERPINE1,PCSK5,SERPINA1,PIK3CG,PMAIP1,PPBP,PVRL2,RB1,RPL27A,CCL3,SRSF7,SCG5,SLC2A1,SLC11A1,SNCA,SSR1,SYK,SYT1,TGFBR1,TIMP1,TLR2,TWIST1,VEGFA,VEGFB,WIPF1,WNT5A,SLC30A1,ZP3,ANP32A,AKAP1,STX11,LIN7A,HMGN3,RAB9A,TGFBRAP1,SCAMP1,RIMS3,DOPEY2,TOM1,ARL…
GOBPID	GO:0001655	0.0270184	1.6644	12.5555	20	240	urogenital system development	EPHB2,FKBP4,HES1,IGF1,CITED1,ODC1,PCSK5,SERPINF1,PLAUR,PRKX,STAT5A,TGFBR1,VEGFA,WNT5A,WNT6,MTSS1,GREM1,SULF2,TSHZ3,ARID5B
GOBPID	GO:0006606	0.0270914	1.74689	10.2014	17	195	protein import into nucleus	BCL6,CD36,CDKN1A,FYB,HES1,IGF1,IL1B,IL10,MT3,MXI1,SLC11A1,TGFBR1,TLR2,AKAP1,KANK1,GREM1,TLR7
GOBPID	GO:0045580	0.0271175	2.24823	4.28981	9	82	regulation of T cell differentiation	BCL6,CD80,HLX,IL2RA,PNP,STAT5A,SYK,VNN1,GIMAP5
GOBPID	GO:0046631	0.0271175	2.24823	4.28981	9	82	alpha-beta T cell activation	BCL6,CD80,DOCK2,HLX,IL18,PNP,SYK,EBI3,GIMAP5
GOBPID	GO:0002712	0.0271925	3.24972	1.72639	5	33	regulation of B cell mediated immunity	BCL6,CD40,IL10,PVRL2,GIMAP5
GOBPID	GO:0007094	0.0271925	3.24972	1.72639	5	33	mitotic cell cycle spindle assembly checkpoint	ATM,CDC16,MAD2L2,ANAPC5,ANAPC7
GOBPID	GO:2000113	0.027217	1.34286	43.212	56	826	negative regulation of cellular macromolecule biosynthetic process	ASCL2,ATR,BACH1,BCL6,BMP2,CD36,CD38,CDKN1C,CEBPA,PLK3,HBEGF,DUSP5,EDN1,EREG,EZH2,BPTF,HHEX,HES1,IRF8,IFI16,IRAK1,CITED1,MT3,NAB2,NFIL3,PHB,RB1,RFX5,SKIL,SNAI1,SUPT5H,TWIST1,WNT5A,ZNF189,ZP3,LRP8,CSDA,URI1,DNAJB6,TRIM28,WWP1,ZHX2,SIN3B,HEY1,GREM1,HIPK2,RASD1,INPP5K,PID1,TSHZ3,SETDB2,ARID5B,GLIS2,PPARGC1B,GLIS3,EIF2AK4
GOBPID	GO:0046822	0.0272947	1.91489	7.16712	13	137	regulation of nucleocytoplasmic transport	CD36,CDKN1A,IGF1,IL1B,IL10,MXI1,TGFBR1,TLR2,WIPF1,AKAP1,KANK1,GREM1,TLR7
GOBPID	GO:0006740	0.027517	5.45219	0.680091	3	13	NADPH regeneration	PGD,TPI1,HIBADH
GOBPID	GO:0010823	0.027517	5.45219	0.680091	3	13	negative regulation of mitochondrion organization	FXN,IGF1,PARL
GOBPID	GO:0014821	0.027517	5.45219	0.680091	3	13	phasic smooth muscle contraction	EDN1,HTR2B,TSHZ3
GOBPID	GO:0030889	0.027517	5.45219	0.680091	3	13	negative regulation of B cell proliferation	ATM,IL10,MNDA
GOBPID	GO:0042448	0.027517	5.45219	0.680091	3	13	progesterone metabolic process	ADM,AKR1C1,DHRS9
GOBPID	GO:0046718	0.027517	5.45219	0.680091	3	13	viral entry into host cell	ITGAV,PVRL2,WWP1
GOBPID	GO:0071354	0.027517	5.45219	0.680091	3	13	cellular response to interleukin-6	PHB,ST3GAL6,PID1
GOBPID	GO:0055074	0.0280783	1.65675	12.6078	20	241	calcium ion homeostasis	ADM,CD38,CD40,CYP27B1,S1PR1,EDN1,FZD2,GNA15,HTR2B,IL1B,CCL1,CCL3,CCL15,CCL23,SLC8A3,SNCA,SLC30A1,NPTN,ATP2C1,GIMAP5
GOBPID	GO:0031647	0.0283287	2.12124	5.02221	10	96	regulation of protein stability	BMP2,CLU,GAPDH,MT3,SNCA,PPAP2B,USP13,TESC,ISOC2,CCDC88C
GOBPID	GO:0002443	0.0283463	1.70631	11.0384	18	211	leukocyte mediated immunity	BCL6,CD40,CLU,ICAM1,IL1B,IL10,MSH2,SERPINB9,PIK3CG,PVRL2,CCL3,SLC11A1,STAT5A,SYK,ZP3,SWAP70,GIMAP5,CRTAM
GOBPID	GO:0001952	0.0283903	2.55047	2.98194	7	57	regulation of cell-matrix adhesion	BCL6,CD36,SERPINE1,SDC4,SRC,VEGFA,PLEKHA2
GOBPID	GO:0042100	0.0283903	2.55047	2.98194	7	57	B cell proliferation	ATM,BCL6,CD38,CD40,CDKN1A,IL10,MNDA
GOBPID	GO:0043434	0.0284857	1.50768	19.9842	29	382	response to peptide hormone stimulus	ADCY7,ADM,PARP1,CISH,EREG,FZD2,HHEX,IDE,IL1B,IL10,IL18,JUNB,LTA4H,CITED1,PPAT,PTPN1,PTPN2,STAT5A,TIMP1,BTG2,NR4A3,AKAP1,SOCS2,ABCC5,KANK1,INSIG2,INPP5K,PID1,GNB4
GOBPID	GO:0072523	0.0285117	1.44183	25.8958	36	495	purine-containing compound catabolic process	AMPD3,BIN1,ARF4,RND3,ARHGAP5,ATP5D,BCL6,CAT,CD40,S1PR1,EIF2S3,GEM,GNA15,HTR2B,MSH2,PNP,NT5E,OXA1L,RAB13,RGS16,RAB7L1,RAB9A,ACAP1,DNAJB6,ARL4C,SPRY2,RASL10A,MRAS,RHOBTB3,KIF1B,RASGRP3,ARFGAP3,RASD1,GNL3L,ADAP2,AGAP4
GOBPID	GO:0009056	0.0286713	1.22564	101.857	120	1947	catabolic process	ABL2,ACADM,ADH5,AMPD3,BIN1,ARF4,RND3,ARHGAP5,ATM,ATP5D,BCAT1,BCL6,ZFP36L2,CAT,CBR3,CD40,CD44,CHI3L2,CLU,PLK3,CYP27B1,DNASE2,ECHS1,S1PR1,EIF2S3,CLN8,GALT,GAPDH,GEM,GK,GNA15,HSP90AB1,HTR2B,IDE,IDH2,IGF1,IL1B,IL10,IDO1,LDHA,LTA4H,ALDH6A1,MSH2,MT3,PNP,NT5E,NTHL1,OXA1L,PFKFB3,PFKP,PGD,PMAIP1,PON2,RAB13,RARRES3,RGS16,ABCE1,RPL27A,SUPT5H,TIMP1,TNFAIP3,TPI1,TTC3,TWIST1,UBA7,UPP1,WNT5A,BTG2,CDC16,RAB7L1,K…
GOBPID	GO:0007091	0.0287557	2.80123	2.35416	6	45	mitotic metaphase/anaphase transition	ATM,RB1,CDC16,MAD2L2,ANAPC5,ANAPC7
GOBPID	GO:0032642	0.0287557	2.80123	2.35416	6	45	regulation of chemokine production	IL1B,IL18,TLR2,TWIST1,WNT5A,TLR7
GOBPID	GO:0016072	0.0288959	2.02774	5.75462	11	110	rRNA metabolic process	DKC1,FBL,DCAF13,FTSJ2,SBDS,NOL8,WDR12,RBFA,IMP4,DIS3L,WDR36
GOBPID	GO:0048771	0.0288959	2.02774	5.75462	11	110	tissue remodeling	CD38,IGF1,IL18,SRC,STAT5A,SYK,TNFAIP3,VEGFA,SEMA3C,GREM1,PPARGC1B
GOBPID	GO:0043583	0.02892	1.80362	8.73656	15	167	ear development	BMP2,CEBPA,EDN1,EPHB2,FZD2,HES1,IGF1,INSIG1,NAGLU,TWIST1,WNT5A,NR4A3,CXCL14,SPRY2,INSIG2
GOBPID	GO:0000079	0.0290612	2.21768	4.34212	9	83	regulation of cyclin-dependent protein kinase activity	CCNE1,CCNG1,CDKN1A,CDKN1C,TNFAIP3,CCNA1,SERTAD1,FAM58A,CCNYL1
GOBPID	GO:0009888	0.0294328	1.28511	60.4758	75	1156	tissue development	ADM,ALDH3A2,BMP2,CD44,CSTA,CTSZ,CYP27B1,RCAN1,DUSP1,DUSP4,DUSP5,DUSP6,S1PR1,EDN1,EREG,FZD2,KAT2A,GSTM3,HHEX,HLX,HES1,HTR2B,IGF1,IL1A,IL10,JUNB,LAMC1,LTA4H,CITED1,MYH11,MYO5A,NAB2,NFATC3,SERPINE1,PLAUR,PRKX,PTGS2,CCL3,SKIL,SNAI1,SRC,STAT5A,SVIL,TGFBR1,TWIST1,VEGFA,WNT5A,WNT6,NR4A3,CSDA,HS2ST1,MTSS1,TRIM28,DHRS9,SEMA3C,DEAF1,AFG3L2,PLXND1,SIN3B,HEY1,CLIC4,GREM1,ATP2C1,SBDS,ENAH,SULF2,ANKH,FAM20C,TW…
GOBPID	GO:0006164	0.0295103	1.72722	10.306	17	197	purine nucleotide biosynthetic process	ADCY7,ADM,ADORA3,AMPD3,ATIC,ATP1B1,ATP5D,EDN1,HTR2B,IMPDH2,MTHFD1,NT5E,PPAT,C16orf7,PAICS,ATP2C1,PID1
GOBPID	GO:0009116	0.0297113	1.45271	24.274	34	464	nucleoside metabolic process	AK4,BIN1,ARF4,RND3,ARHGAP5,BCL6,CD40,S1PR1,EIF2S3,GEM,GNA15,HTR2B,IMPDH2,PNP,NT5E,PPAT,RAB13,RGS16,UPP1,RAB7L1,RAB9A,ENTPD4,ACAP1,ARL4C,SPRY2,RASL10A,MRAS,RASGRP3,ARFGAP3,RASD1,GNL3L,ADAP2,QTRT1,AGAP4
GOBPID	GO:0002042	0.0297451	3.82867	1.20324	4	23	cell migration involved in sprouting angiogenesis	EFNB2,PTGS2,VEGFA,GREM1
GOBPID	GO:0009081	0.0297451	3.82867	1.20324	4	23	branched-chain amino acid metabolic process	BCAT1,ALDH6A1,STAT5A,HIBADH
GOBPID	GO:0014896	0.0297451	3.82867	1.20324	4	23	muscle hypertrophy	EDN1,HTR2B,IGF1,AKAP1
GOBPID	GO:0042554	0.0297451	3.82867	1.20324	4	23	superoxide anion generation	EDN1,IL18,SOD2,SYK
GOBPID	GO:0043029	0.0297451	3.82867	1.20324	4	23	T cell homeostasis	IL2RA,PMAIP1,STAT5A,GIMAP5
GOBPID	GO:0044003	0.0297451	3.82867	1.20324	4	23	modification by symbiont of host morphology or physiology	ITGAV,TLR2,TNIP1,TLR7
GOBPID	GO:0019219	0.0301892	1.18077	172.22	194	3292	regulation of nucleobase-containing compound metabolic process	ADCY7,ADM,ADORA3,PARP1,BIN1,APEX1,ARHGAP5,ASCL2,ATR,BACH1,BCL6,BMP2,ZFP36L2,CAT,CCNE1,CD80,CD36,CD38,CD40,CDKN1A,CDKN1C,CEBPA,CLU,CMKLR1,PLK3,DBP,DDX1,ARID3A,RCAN1,DUSP5,S1PR1,EDN1,EREG,ETS2,EZH2,BPTF,FLI1,FOSL2,FZD2,KAT2A,NR3C1,GTF2F2,HHEX,HES1,HTR2B,ICAM1,IRF8,IFI16,IGF1,IL1B,IL10,IL16,INSIG1,IRAK1,IRAK2,JUNB,LYL1,MXD1,MNDA,CITED1,MSH2,MT3,MTF1,MXI1,NAB2,NDP,NFATC3,NFIL3,OSM,OXA1L,PHB,PLAGL2,PP…
GOBPID	GO:0030166	0.0305541	3.13743	1.7787	5	34	proteoglycan biosynthetic process	IGF1,HS2ST1,HS3ST3B1,CHSY1,GAL3ST4
GOBPID	GO:0042345	0.0305541	3.13743	1.7787	5	34	regulation of NF-kappaB import into nucleus	IL1B,IL10,TLR2,GREM1,TLR7
GOBPID	GO:0042348	0.0305541	3.13743	1.7787	5	34	NF-kappaB import into nucleus	IL1B,IL10,TLR2,GREM1,TLR7
GOBPID	GO:0043488	0.0305541	3.13743	1.7787	5	34	regulation of mRNA stability	APEX1,ZFP36L2,SLC11A1,VEGFA,SERBP1
GOBPID	GO:0071173	0.0305541	3.13743	1.7787	5	34	spindle assembly checkpoint	ATM,CDC16,MAD2L2,ANAPC5,ANAPC7
GOBPID	GO:0051247	0.0306902	1.33536	42.6365	55	815	positive regulation of protein metabolic process	ADCY7,BMP2,CD80,CD36,CD40,CD44,CLU,PLK3,EDN1,EREG,FLT3,FNTA,HES1,HTR2B,IGF1,IL1A,IL1B,IL8,IRAK1,IRAK2,MAP3K5,MT3,OSM,PIK3CG,PPP2R5B,RAP2B,SDC4,SLC11A1,SNCA,SSR1,STAT5A,SYK,TGFBR1,TLR2,TNFAIP3,VEGFA,VEGFB,WNT5A,ZP3,LRP8,PPAP2B,CDC16,HERPUD1,EBI3,SPRY2,MAD2L2,GREM1,NPTN,TLR7,ANAPC5,ANAPC7,RAP2C,SRPRB,FAM129A,NHLRC1
GOBPID	GO:0051170	0.0307783	1.71755	10.3583	17	198	nuclear import	BCL6,CD36,CDKN1A,FYB,HES1,IGF1,IL1B,IL10,MT3,MXI1,SLC11A1,TGFBR1,TLR2,AKAP1,KANK1,GREM1,TLR7
GOBPID	GO:0006775	0.0308858	2.50027	3.03425	7	58	fat-soluble vitamin metabolic process	CBR1,CBR3,CYP27B1,AKR1C1,LGMN,SNAI1,DHRS9
GOBPID	GO:0007033	0.0308858	2.50027	3.03425	7	58	vacuole organization	CLN8,MT3,NAGLU,NDP,TP53INP2,MAP1LC3A,ATG4C
GOBPID	GO:0060429	0.0309663	1.41727	27.7791	38	531	epithelium development	ADM,BMP2,CSTA,CTSZ,CYP27B1,S1PR1,EDN1,EREG,FZD2,KAT2A,GSTM3,HHEX,HES1,IGF1,IL1A,IL10,LTA4H,CITED1,NFATC3,PLAUR,PRKX,SRC,STAT5A,TGFBR1,TWIST1,VEGFA,WNT5A,WNT6,HS2ST1,MTSS1,DHRS9,SEMA3C,DEAF1,PLXND1,CLIC4,GREM1,ENAH,SETDB2
GOBPID	GO:0055072	0.0311003	2.18795	4.39444	9	84	iron ion homeostasis	ABCB7,FXN,SLC11A1,SOD2,SLC25A37,TTC7A,HAMP,SFXN2,SFXN4
GOBPID	GO:0006629	0.0311271	1.28937	57.023	71	1090	lipid metabolic process	ACADM,ADH5,ADM,ATM,BMP2,CAT,CD36,CEBPA,CLU,CYP27B1,AKR1C1,ECHS1,EDN1,CLN8,ACSL1,ACSL4,FLT3,GK,HSD11B1,HTR2B,IL1A,IL1B,INSIG1,ITGB8,LTA4H,MT3,MYO5A,PIK3CG,PLAUR,LGMN,PTGS2,RARRES3,RB1,SLC22A4,SNAI1,SNCA,SORL1,STAT5A,SYK,TWIST1,ZP3,LRP8,NSMAF,PPAP2A,PPAP2B,NCOA1,ACAP1,DHRS9,ST3GAL6,PDPN,PMVK,SMPDL3A,PTGR1,GPD1L,SIN3B,NAAA,PRPF19,GRHL1,G0S2,INSIG2,INPP5K,GIMAP5,TEX2,NCEH1,MID1IP1,MBOAT7,DGAT2,OSBPL1…
GOBPID	GO:0042592	0.0320467	1.28488	58.017	72	1109	homeostatic process	ABCB7,ADM,PARP1,AQP9,BCL6,CD38,CD40,CYP27B1,AKR1C1,DKC1,DNASE2,S1PR1,EDN1,FLT3,FXN,FZD2,SLC37A4,GNA15,HTR2B,ICAM1,IDE,IGF1,IL1A,IL1B,IL2RA,MCL1,MT1A,MT2A,MT3,MYO5A,NAB2,SERPINE1,PMAIP1,PMP22,PTGS2,CCL1,CCL3,CCL15,CCL23,SEPW1,SKIL,SLC8A3,SLC9A5,SLC11A1,SNCA,SOD2,SRC,STAT5A,SYK,TIMP1,TNFAIP3,VEGFA,SLC30A1,HMGN3,EHD1,AFG3L2,NPTN,ATP2C1,HIPK2,RANGRF,SLC25A37,INPP5K,TERF2IP,PID1,GIMAP5,TTC7A,HAMP,PIF1…
GOBPID	GO:0002252	0.0320553	1.49034	20.1935	29	386	immune effector process	AP2A2,AP1B1,BCL6,CD80,CD36,CD40,CLU,DOCK2,HLX,ICAM1,IL1B,IL2RA,IL10,MSH2,SERPINB9,PIK3CG,PVRL2,CCL3,SLC11A1,STAT5A,SYK,TLR2,TNFAIP3,WNT5A,ZP3,SWAP70,TLR7,GIMAP5,CRTAM
GOBPID	GO:0007167	0.0325795	1.3298	42.7934	55	818	enzyme linked receptor protein signaling pathway	ADCY7,AP2A2,ARF4,BMP2,CDKN1C,CISH,HBEGF,DUSP4,DUSP6,EFNB2,EPHB2,EREG,FLT3,FNTA,HHEX,HES1,IDE,IGF1,IL1B,IRAK1,LTBP2,CITED1,MT3,PCSK5,PPP2R5B,PTPN1,PTPN2,SKIL,SNCA,SRC,SS18,STAT5A,SYK,TGFBR1,VEGFA,VEGFB,WNT5A,SOCS2,TGFBRAP1,MTSS1,SPRY2,KANK1,ARHGEF18,GREM1,NPTN,HIPK2,BLNK,CRIM1,INPP5K,PID1,PAG1,SULF2,TWSG1,CSRNP1,ARID5B
GOBPID	GO:1901068	0.0329989	1.48607	20.2458	29	387	guanosine-containing compound metabolic process	AK4,BIN1,ARF4,RND3,ARHGAP5,BCL6,CD40,S1PR1,EIF2S3,GEM,GNA15,HTR2B,IMPDH2,RAB13,RGS16,RAB7L1,RAB9A,ACAP1,ARL4C,SPRY2,RASL10A,MRAS,RASGRP3,ARFGAP3,RASD1,GNL3L,ADAP2,QTRT1,AGAP4
GOBPID	GO:0006874	0.0330203	1.64749	12.0324	19	230	cellular calcium ion homeostasis	ADM,CD38,CD40,S1PR1,EDN1,FZD2,GNA15,HTR2B,IL1B,CCL1,CCL3,CCL15,CCL23,SLC8A3,SNCA,SLC30A1,NPTN,ATP2C1,GIMAP5
GOBPID	GO:0019722	0.0332369	2.159	4.44675	9	85	calcium-mediated signaling	CMKLR1,RCAN1,EDN1,HTR2B,IGF1,IL8,CCL3,SYK,CAMKK2
GOBPID	GO:0030968	0.0332369	2.159	4.44675	9	85	endoplasmic reticulum unfolded protein response	IL8,PPP2R5B,PTPN1,SSR1,HERPUD1,PPP1R15A,ERO1L,SRPRB,EIF2AK4
GOBPID	GO:0034620	0.0332369	2.159	4.44675	9	85	cellular response to unfolded protein	IL8,PPP2R5B,PTPN1,SSR1,HERPUD1,PPP1R15A,ERO1L,SRPRB,EIF2AK4
GOBPID	GO:0006684	0.0336906	4.95617	0.732406	3	14	sphingomyelin metabolic process	SMPDL3A,SAMD8,SGMS2
GOBPID	GO:0009435	0.0336906	4.95617	0.732406	3	14	NAD biosynthetic process	PNP,KYNU,NAMPT
GOBPID	GO:0031649	0.0336906	4.95617	0.732406	3	14	heat generation	IL1A,IL1B,PTGS2
GOBPID	GO:0032494	0.0336906	4.95617	0.732406	3	14	response to peptidoglycan	IRAK1,TLR2,TNFAIP3
GOBPID	GO:0042033	0.0336906	4.95617	0.732406	3	14	chemokine biosynthetic process	IL1B,IL18,WNT5A
GOBPID	GO:0051150	0.0336906	4.95617	0.732406	3	14	regulation of smooth muscle cell differentiation	RCAN1,EREG,TSHZ3
GOBPID	GO:0051193	0.0336906	4.95617	0.732406	3	14	regulation of cofactor metabolic process	PDK3,SNCA,PDHX
GOBPID	GO:0051196	0.0336906	4.95617	0.732406	3	14	regulation of coenzyme metabolic process	PDK3,SNCA,PDHX
GOBPID	GO:2000108	0.0336906	4.95617	0.732406	3	14	positive regulation of leukocyte apoptotic process	IL10,WNT5A,NR4A3
GOBPID	GO:2001234	0.0336906	4.95617	0.732406	3	14	negative regulation of apoptotic signaling pathway	MCL1,SRC,PARL
GOBPID	GO:0052547	0.0338548	1.61949	12.8694	20	246	regulation of peptidase activity	SERPINH1,CD44,CSTA,MAP3K5,MT3,SERPINE1,SERPINF1,SERPINA1,SERPINB9,PMAIP1,RENBP,SNCA,TFPI,TNFAIP3,VEGFA,DNAJB6,SPINT2,TNFAIP8,PCOLCE2,PYCARD
GOBPID	GO:0048729	0.0338618	1.4718	21.1351	30	404	tissue morphogenesis	ADM,BMP2,CTSZ,EDN1,KAT2A,HHEX,HES1,IGF1,IL10,CITED1,NFATC3,PRKX,SNAI1,SRC,STAT5A,TWIST1,VEGFA,WNT5A,WNT6,NR4A3,HS2ST1,MTSS1,SEMA3C,DEAF1,PLXND1,HEY1,GREM1,ENAH,TWSG1,SETDB2
GOBPID	GO:0007369	0.0340411	1.90463	6.64397	12	127	gastrulation	CD44,DUSP1,DUSP4,DUSP5,DUSP6,HHEX,IL1B,SNAI1,WNT5A,NR4A3,PPAP2B,TWSG1
GOBPID	GO:0007259	0.0340905	2.04928	5.17916	10	99	JAK-STAT cascade	CD40,CISH,FLT3,HES1,IGF1,OSM,PTPN1,STAT2,STAT5A,SOCS2
GOBPID	GO:0045619	0.0340905	2.04928	5.17916	10	99	regulation of lymphocyte differentiation	BCL6,CD80,FLT3,HLX,IL2RA,PNP,STAT5A,SYK,VNN1,GIMAP5
GOBPID	GO:0033628	0.0341654	3.03262	1.83102	5	35	regulation of cell adhesion mediated by integrin	SERPINE1,PIK3CG,SYK,WNT5A,TESC
GOBPID	GO:0045841	0.0341654	3.03262	1.83102	5	35	negative regulation of mitotic metaphase/anaphase transition	ATM,CDC16,MAD2L2,ANAPC5,ANAPC7
GOBPID	GO:0001912	0.0342618	3.63697	1.25555	4	24	positive regulation of leukocyte mediated cytotoxicity	PVRL2,STAT5A,GIMAP5,CRTAM
GOBPID	GO:0002702	0.0342618	3.63697	1.25555	4	24	positive regulation of production of molecular mediator of immune response	CD36,TLR2,WNT5A,GIMAP5
GOBPID	GO:0010259	0.0342618	3.63697	1.25555	4	24	multicellular organismal aging	CAT,EDN1,IDE,MSH2
GOBPID	GO:0030728	0.0342618	3.63697	1.25555	4	24	ovulation	EREG,IL1B,MMP19,PTGS2
GOBPID	GO:0031111	0.0342618	3.63697	1.25555	4	24	negative regulation of microtubule polymerization or depolymerization	FKBP4,SNCA,SBDS,MID1IP1
GOBPID	GO:0045600	0.0342618	3.63697	1.25555	4	24	positive regulation of fat cell differentiation	BMP2,CEBPA,PTGS2,SH3PXD2B
GOBPID	GO:0050873	0.0342618	3.63697	1.25555	4	24	brown fat cell differentiation	CEBPA,PTGS2,ERO1L,LRG1
GOBPID	GO:0060397	0.0342618	3.63697	1.25555	4	24	JAK-STAT cascade involved in growth hormone signaling pathway	CISH,PTPN1,STAT5A,SOCS2
GOBPID	GO:0019362	0.0347488	2.66419	2.45879	6	47	pyridine nucleotide metabolic process	PNP,PGD,TPI1,KYNU,NAMPT,HIBADH
GOBPID	GO:0030850	0.0347488	2.66419	2.45879	6	47	prostate gland development	FKBP4,IGF1,SERPINF1,PLAUR,STAT5A,WNT5A
GOBPID	GO:0032602	0.0347488	2.66419	2.45879	6	47	chemokine production	IL1B,IL18,TLR2,TWIST1,WNT5A,TLR7
GOBPID	GO:0046496	0.0347488	2.66419	2.45879	6	47	nicotinamide nucleotide metabolic process	PNP,PGD,TPI1,KYNU,NAMPT,HIBADH
GOBPID	GO:0072524	0.0347488	2.66419	2.45879	6	47	pyridine-containing compound metabolic process	PNP,PGD,TPI1,KYNU,NAMPT,HIBADH
GOBPID	GO:0060627	0.0348246	1.68917	10.5153	17	201	regulation of vesicle-mediated transport	ABL2,BIN1,CD36,ITGAV,SERPINE1,PTPN1,SLC11A1,SNCA,SYK,SYT1,VEGFA,ZP3,RAB9A,MERTK,NCS1,GREM1,STXBP5
GOBPID	GO:0048839	0.0351507	1.84	7.42869	13	142	inner ear development	BMP2,CEBPA,EPHB2,FZD2,HES1,IGF1,INSIG1,NAGLU,WNT5A,NR4A3,CXCL14,SPRY2,INSIG2
GOBPID	GO:0043405	0.0356065	1.63178	12.137	19	232	regulation of MAP kinase activity	CD40,DUSP1,DUSP4,DUSP5,DUSP6,EDN1,FLT3,HTR2B,IL1B,IRAK1,IRAK2,MAP3K5,PIK3CG,SYK,VEGFA,WNT5A,SPRY2,INPP5K,SPRED2
GOBPID	GO:0046128	0.0356128	1.45489	22.0768	31	422	purine ribonucleoside metabolic process	AK4,BIN1,ARF4,RND3,ARHGAP5,BCL6,CD40,S1PR1,EIF2S3,GEM,GNA15,HTR2B,IMPDH2,PNP,NT5E,RAB13,RGS16,RAB7L1,RAB9A,ACAP1,ARL4C,SPRY2,RASL10A,MRAS,RASGRP3,ARFGAP3,RASD1,GNL3L,ADAP2,QTRT1,AGAP4
GOBPID	GO:0002420	0.0356208	9.07891	0.313888	2	6	natural killer cell mediated cytotoxicity directed against tumor cell target	PVRL2,CRTAM
GOBPID	GO:0002423	0.0356208	9.07891	0.313888	2	6	natural killer cell mediated immune response to tumor cell	PVRL2,CRTAM
GOBPID	GO:0002483	0.0356208	9.07891	0.313888	2	6	antigen processing and presentation of endogenous peptide antigen	ERAP1,ERAP2
GOBPID	GO:0002855	0.0356208	9.07891	0.313888	2	6	regulation of natural killer cell mediated immune response to tumor cell	PVRL2,CRTAM
GOBPID	GO:0002857	0.0356208	9.07891	0.313888	2	6	positive regulation of natural killer cell mediated immune response to tumor cell	PVRL2,CRTAM
GOBPID	GO:0002858	0.0356208	9.07891	0.313888	2	6	regulation of natural killer cell mediated cytotoxicity directed against tumor cell target	PVRL2,CRTAM
GOBPID	GO:0002860	0.0356208	9.07891	0.313888	2	6	positive regulation of natural killer cell mediated cytotoxicity directed against tumor cell target	PVRL2,CRTAM
GOBPID	GO:0006072	0.0356208	9.07891	0.313888	2	6	glycerol-3-phosphate metabolic process	GK,GPD1L
GOBPID	GO:0006467	0.0356208	9.07891	0.313888	2	6	protein thiol-disulfide exchange	ERO1L,ERO1LB
GOBPID	GO:0019885	0.0356208	9.07891	0.313888	2	6	antigen processing and presentation of endogenous peptide antigen via MHC class I	ERAP1,ERAP2
GOBPID	GO:0035305	0.0356208	9.07891	0.313888	2	6	negative regulation of dephosphorylation	AKAP1,INPP5K
GOBPID	GO:0045410	0.0356208	9.07891	0.313888	2	6	positive regulation of interleukin-6 biosynthetic process	EREG,IL1B
GOBPID	GO:0045835	0.0356208	9.07891	0.313888	2	6	negative regulation of meiosis	MSH2,OSM
GOBPID	GO:0048251	0.0356208	9.07891	0.313888	2	6	elastic fiber assembly	MYH11,FBLN5
GOBPID	GO:0050847	0.0356208	9.07891	0.313888	2	6	progesterone receptor signaling pathway	PHB,SRC
GOBPID	GO:0051409	0.0356208	9.07891	0.313888	2	6	response to nitrosative stress	ADH5,DUSP6
GOBPID	GO:0051497	0.0356208	9.07891	0.313888	2	6	negative regulation of stress fiber assembly	S1PR1,INPP5K
GOBPID	GO:0051589	0.0356208	9.07891	0.313888	2	6	negative regulation of neurotransmitter transport	SNCA,SLC30A1
GOBPID	GO:0052564	0.0356208	9.07891	0.313888	2	6	response to immune response of other organism involved in symbiotic interaction	TLR2,TLR7
GOBPID	GO:0052572	0.0356208	9.07891	0.313888	2	6	response to host immune response	TLR2,TLR7
GOBPID	GO:0061307	0.0356208	9.07891	0.313888	2	6	cardiac neural crest cell differentiation involved in heart development	HES1,TWIST1
GOBPID	GO:0090050	0.0356208	9.07891	0.313888	2	6	positive regulation of cell migration involved in sprouting angiogenesis	PTGS2,VEGFA
GOBPID	GO:0051260	0.035998	1.65412	11.3523	18	217	protein homooligomerization	CAT,CLU,AKR1C1,IDE,MGST1,PFKP,PPAT,RAD51,SHMT2,SKIL,SOD2,SYT1,EHD1,EVL,KCTD15,SHKBP1,KCTD20,CCDC88C
GOBPID	GO:0007507	0.0360577	1.50795	17.8916	26	342	heart development	ADM,ATM,BMP2,VCAN,DUSP6,EDN1,FZD2,HHEX,HES1,HTR2B,MYH11,NFATC3,PCSK5,SOD2,TGFBR1,TWIST1,VEGFA,VEGFB,WNT5A,SEMA3C,SIN3B,HEY1,GREM1,ADAP2,SETDB2,SH3PXD2B
GOBPID	GO:0006790	0.0362308	1.74553	8.99813	15	172	sulfur compound metabolic process	AHCY,GSTM3,IGF1,MGST1,MTHFD1,SOD2,STAT5A,PAPSS2,PAPSS1,CHST2,HS2ST1,HS3ST3B1,CHSY1,SULF2,GAL3ST4
GOBPID	GO:0031329	0.0365927	1.45107	22.1291	31	423	regulation of cellular catabolic process	ABL2,BIN1,ARHGAP5,BCL6,CD40,CLU,PLK3,S1PR1,HSP90AB1,HTR2B,IGF1,IL1B,IL10,MT3,OXA1L,RGS16,SUPT5H,TIMP1,TWIST1,BTG2,USP13,ACAP1,DNAJB6,SPRY2,MAD2L2,RASGRP3,ARFGAP3,DDIT4,ADAP2,TP53INP2,AGAP4
GOBPID	GO:0002312	0.0380304	2.93458	1.88333	5	36	B cell activation involved in immune response	BCL6,CD40,IL10,MSH2,SWAP70
GOBPID	GO:0031341	0.0380304	2.93458	1.88333	5	36	regulation of cell killing	ICAM1,PVRL2,STAT5A,GIMAP5,CRTAM
GOBPID	GO:0032652	0.0380304	2.93458	1.88333	5	36	regulation of interleukin-1 production	IL18,CCL3,TNFAIP3,WNT5A,PYCARD
GOBPID	GO:0043487	0.0380304	2.93458	1.88333	5	36	regulation of RNA stability	APEX1,ZFP36L2,SLC11A1,VEGFA,SERBP1
GOBPID	GO:0071174	0.0380304	2.93458	1.88333	5	36	mitotic cell cycle spindle checkpoint	ATM,CDC16,MAD2L2,ANAPC5,ANAPC7
GOBPID	GO:0055085	0.0381151	1.31839	42.3226	54	809	transmembrane transport	ABCB7,ADCY7,AQP9,ATP1B1,ATP5D,CD36,CDKN1A,SLC37A4,HTR2B,IGF1,IL1B,IL10,ITGAV,MXI1,MYO5A,PLP2,SLC2A1,SLC8A3,SLC9A5,SLC11A1,SLC22A1,SLC22A4,TGFBR1,TLR2,TRPM2,TWIST1,SLC30A1,ZP3,AKAP1,PKD2L1,C16orf7,NUPL1,SLC23A2,SLC12A6,ABCC5,ATP8A1,KANK1,NCS1,GREM1,ATP2C1,RANGRF,TLR7,SLC38A2,TESC,TMEM38B,KCNK13,SLC39A8,SLC41A2,SLC18B1,SLC16A10,SLC15A4,SLC25A43,SLC37A2,SLC46A3
GOBPID	GO:0003018	0.0382678	1.92954	6.01619	11	115	vascular process in circulatory system	ADM,CD38,EDN1,HTR2B,ICAM1,IL18,PTGS2,PTPRM,SOD2,SRC,VEGFA
GOBPID	GO:0009636	0.0383581	2.00395	5.28379	10	101	response to toxin	BLMH,CDKN1A,AKR1C1,NQO1,MAOB,PEBP1,CCL3,TGFBR1,SLC30A1,PTGR1
GOBPID	GO:0030518	0.0383581	2.00395	5.28379	10	101	intracellular steroid hormone receptor signaling pathway	CCNE1,FKBP4,NR3C1,IGF1,PHB,RB1,SRC,PPAP2A,NCOA1,PPARGC1B
GOBPID	GO:0042471	0.0383581	2.00395	5.28379	10	101	ear morphogenesis	EDN1,EPHB2,FZD2,INSIG1,NAGLU,TWIST1,WNT5A,NR4A3,SPRY2,INSIG2
GOBPID	GO:0043542	0.0383581	2.00395	5.28379	10	101	endothelial cell migration	EDN1,EFNB2,PRKX,PTGS2,PTPRM,VEGFA,WNT5A,PLXND1,GPR124,GREM1
GOBPID	GO:0042278	0.0386137	1.44348	22.2338	31	425	purine nucleoside metabolic process	AK4,BIN1,ARF4,RND3,ARHGAP5,BCL6,CD40,S1PR1,EIF2S3,GEM,GNA15,HTR2B,IMPDH2,PNP,NT5E,RAB13,RGS16,RAB7L1,RAB9A,ACAP1,ARL4C,SPRY2,RASL10A,MRAS,RASGRP3,ARFGAP3,RASD1,GNL3L,ADAP2,QTRT1,AGAP4
GOBPID	GO:0031670	0.0389557	2.20856	3.87129	8	74	cellular response to nutrient	ABL2,CCNE1,CYP27B1,FZD2,WNT5A,WNT6,NCOA1,TESC
GOBPID	GO:0051494	0.0389557	2.20856	3.87129	8	74	negative regulation of cytoskeleton organization	S1PR1,FKBP4,SNCA,KANK1,SBDS,INPP5K,CDK5RAP2,MID1IP1
GOBPID	GO:0051049	0.0389929	1.29785	47.7633	60	913	regulation of transport	ABL2,BIN1,CD36,CD38,CD40,CDKN1A,EDN1,LRRC32,HTR2B,ICAM1,IGF1,IL1A,IL1B,IL10,IRAK1,ITGAV,MAOB,MXI1,MYO5A,OSM,SERPINE1,PTGS2,PTPN1,CCL3,SGK1,SCG5,SLC2A1,SLC11A1,SNCA,SYK,SYT1,TGFBR1,TLR2,TWIST1,VEGFA,WIPF1,WNT5A,SLC30A1,ZP3,AKAP1,PKD2L1,HMGN3,RAB9A,NUPL1,MERTK,KANK1,NCS1,CLEC4E,GREM1,RANGRF,PYCARD,TLR7,INPP5K,TESC,PID1,GIMAP5,CRTAM,YRDC,STXBP5,CNKSR3
GOBPID	GO:0048608	0.0390782	1.59085	13.0787	20	250	reproductive structure development	CCNE1,EREG,FKBP4,FZD2,GJB2,ICAM1,IGF1,MGST1,MMP19,MSH2,SERPINF1,PLAUR,SRC,STAT5A,VEGFA,WNT5A,ZP3,CSDA,MAMLD1,ARID5B
GOBPID	GO:0061458	0.0390782	1.59085	13.0787	20	250	reproductive system development	CCNE1,EREG,FKBP4,FZD2,GJB2,ICAM1,IGF1,MGST1,MMP19,MSH2,SERPINF1,PLAUR,SRC,STAT5A,VEGFA,WNT5A,ZP3,CSDA,MAMLD1,ARID5B
GOBPID	GO:0001825	0.0391546	3.46353	1.30787	4	25	blastocyst formation	JUNB,SKIL,ZP3,CCNB1IP1
GOBPID	GO:0001954	0.0391546	3.46353	1.30787	4	25	positive regulation of cell-matrix adhesion	CD36,SDC4,VEGFA,PLEKHA2
GOBPID	GO:0006044	0.0391546	3.46353	1.30787	4	25	N-acetylglucosamine metabolic process	RENBP,CHST2,GNPDA1,NAGK
GOBPID	GO:0042092	0.0391546	3.46353	1.30787	4	25	type 2 immune response	BCL6,HLX,IL10,IL18
GOBPID	GO:0051602	0.0391546	3.46353	1.30787	4	25	response to electrical stimulus	PEBP1,SOD2,TGFBR1,BTG2
GOBPID	GO:2001236	0.0391546	3.46353	1.30787	4	25	regulation of extrinsic apoptotic signaling pathway	LTBR,MCL1,SRC,TNFRSF12A
GOBPID	GO:0030098	0.0392479	1.6617	10.6722	17	204	lymphocyte differentiation	ATM,BCL6,CD80,DOCK2,FLT3,HHEX,HLX,IL2RA,IL10,LYL1,MSH2,PNP,STAT5A,SYK,VNN1,BLNK,GIMAP5
GOBPID	GO:0016049	0.0394015	1.48159	18.8856	27	361	cell growth	BCL6,CCNG1,CD38,CDKN1A,CISH,CYP27B1,HBEGF,EDN1,ACSL4,FXN,MT3,PHB,RB1,SGK1,TGFBR1,WNT5A,URI1,SOCS2,MAD2L2,C6orf108,CYFIP1,ABTB2,NUPR1,GREM1,CRIM1,TNFRSF12A,NOL8
GOBPID	GO:0006897	0.0394506	1.49343	18.0486	26	345	endocytosis	ABL2,ADM,AP2A2,AP1B1,BIN1,CD36,HTR2B,IRF8,IL8,ITGAV,SERPINE1,PIK3CG,PTPN1,SLC11A1,SNCA,SORL1,SYK,ICAM5,VEGFA,LRP8,TOM1,MERTK,EHD1,GREM1,LRP12,DNER
GOBPID	GO:0009164	0.0402071	1.4568	20.612	29	394	nucleoside catabolic process	BIN1,ARF4,RND3,ARHGAP5,BCL6,CD40,S1PR1,EIF2S3,GEM,GNA15,HTR2B,PNP,NT5E,RAB13,RGS16,UPP1,RAB7L1,RAB9A,ACAP1,ARL4C,SPRY2,RASL10A,MRAS,RASGRP3,ARFGAP3,RASD1,GNL3L,ADAP2,AGAP4
GOBPID	GO:0009154	0.0403532	1.42856	23.1754	32	443	purine ribonucleotide catabolic process	AMPD3,BIN1,ARF4,RND3,ARHGAP5,ATP5D,BCL6,CD40,S1PR1,EIF2S3,GEM,GNA15,HTR2B,MSH2,NT5E,RAB13,RGS16,RAB7L1,RAB9A,ACAP1,ARL4C,SPRY2,RASL10A,MRAS,RHOBTB3,KIF1B,RASGRP3,ARFGAP3,RASD1,GNL3L,ADAP2,AGAP4
GOBPID	GO:0007263	0.0405174	4.54283	0.784721	3	15	nitric oxide mediated signal transduction	CD36,MT1A,RASD1
GOBPID	GO:0019359	0.0405174	4.54283	0.784721	3	15	nicotinamide nucleotide biosynthetic process	PNP,KYNU,NAMPT
GOBPID	GO:0019363	0.0405174	4.54283	0.784721	3	15	pyridine nucleotide biosynthetic process	PNP,KYNU,NAMPT
GOBPID	GO:0050755	0.0405174	4.54283	0.784721	3	15	chemokine metabolic process	IL1B,IL18,WNT5A
GOBPID	GO:0060317	0.0405174	4.54283	0.784721	3	15	cardiac epithelial to mesenchymal transition	BMP2,TWIST1,HEY1
GOBPID	GO:0072525	0.0405174	4.54283	0.784721	3	15	pyridine-containing compound biosynthetic process	PNP,KYNU,NAMPT
GOBPID	GO:0009894	0.0405307	1.412	24.9018	34	476	regulation of catabolic process	ABL2,BIN1,ARHGAP5,BCL6,CD40,CLU,PLK3,S1PR1,HSP90AB1,HTR2B,IGF1,IL1B,IL10,MT3,OXA1L,RGS16,SUPT5H,TIMP1,TNFAIP3,TWIST1,WNT5A,BTG2,USP13,ACAP1,DNAJB6,SPRY2,MAD2L2,RASGRP3,ARFGAP3,DDIT4,GIMAP5,ADAP2,TP53INP2,AGAP4
GOBPID	GO:0018130	0.0405511	1.51555	16.4268	24	314	heterocycle biosynthetic process	ADCY7,ADM,ADORA3,AMPD3,ATIC,ATP1B1,ATP5D,EDN1,FXN,HTR2B,IMPDH2,MTHFD1,PNP,NT5E,PPAT,UPP1,KYNU,C16orf7,NAMPT,GPHN,PAICS,ATP2C1,PID1,QTRT1
GOBPID	GO:0060541	0.0410563	1.75097	8.37035	14	160	respiratory system development	CEBPA,CTSZ,HHEX,HES1,HSD11B1,IGF1,IL18,LTA4H,TGFBR1,VEGFA,WNT5A,SPRY2,PDPN,TSHZ3
GOBPID	GO:0019915	0.0414923	2.53991	2.56342	6	49	lipid storage	CD36,IL1B,ITGAV,STAT5A,EHD1,DGAT2
GOBPID	GO:0071356	0.0416962	2.17543	3.9236	8	75	cellular response to tumor necrosis factor	EDN1,ICAM1,IL8,IL18,CCL3,PYCARD,INPP5K,PID1
GOBPID	GO:0006091	0.0418013	1.43225	22.3907	31	428	generation of precursor metabolites and energy	ADCY7,ATP5D,CAT,CEBPA,FXN,GAPDH,GBE1,IDH2,IGF1,LDHA,MSH2,MT3,NDUFV1,NFATC3,OXA1L,PFKFB3,PFKP,SLC2A1,SNCA,SOD2,TPI1,DYRK2,GNPDA1,NNT,ERO1L,INPP5K,DDIT4,PID1,DHTKD1,ERO1LB,GNB4
GOBPID	GO:0000060	0.0421519	2.84267	1.93564	5	37	protein import into nucleus, translocation	BCL6,CDKN1A,IGF1,MT3,SLC11A1
GOBPID	GO:0007159	0.0421519	2.84267	1.93564	5	37	leukocyte cell-cell adhesion	CD44,ICAM1,IL1B,SYK,TNIP1
GOBPID	GO:0010821	0.0421519	2.84267	1.93564	5	37	regulation of mitochondrion organization	FXN,IGF1,PMAIP1,PID1,PARL
GOBPID	GO:0016447	0.0421519	2.84267	1.93564	5	37	somatic recombination of immunoglobulin gene segments	BCL6,CD40,IL10,MSH2,SWAP70
GOBPID	GO:0032611	0.0421519	2.84267	1.93564	5	37	interleukin-1 beta production	IL18,CCL3,TNFAIP3,WNT5A,PYCARD
GOBPID	GO:0043500	0.0421519	2.84267	1.93564	5	37	muscle adaptation	EDN1,IGF1,IL1B,TBCE,AKAP1
GOBPID	GO:0030521	0.0423253	2.31776	3.24351	7	62	androgen receptor signaling pathway	CCNE1,FKBP4,IGF1,PHB,RB1,PPAP2A,NCOA1
GOBPID	GO:0070167	0.0423253	2.31776	3.24351	7	62	regulation of biomineral tissue development	BMP2,CYP27B1,CCL3,TWIST1,WNT6,GREM1,ANKH
GOBPID	GO:0032526	0.0427941	2.05045	4.65601	9	89	response to retinoic acid	ABL2,BMP2,CD38,DUSP1,SERPINF1,WNT5A,WNT6,NCOA1,TESC
GOBPID	GO:0050678	0.0427943	1.67043	9.99211	16	191	regulation of epithelial cell proliferation	BMP2,CDKN1C,EREG,HTR2B,IGF1,LAMC1,MMP12,SERPINF1,PTPRM,RB1,TNFAIP3,VEGFA,VEGFB,WNT5A,MTSS1,DEAF1
GOBPID	GO:0050778	0.0429358	1.46807	19.0426	27	364	positive regulation of immune response	CD38,CLU,DUSP4,DUSP6,EREG,FYB,IL1B,IRAK1,IRAK2,MNDA,PVRL2,SLC11A1,STAT5A,SYK,TLR2,TLR5,TNFAIP3,ZP3,TNIP1,POLR3G,TLR7,GIMAP5,POLR3B,ENAH,PAG1,CRTAM,TNIP3
GOBPID	GO:0009108	0.0429806	1.96056	5.38842	10	103	coenzyme biosynthetic process	ACSL1,ACSL4,MTHFD1,PNP,PDK3,SNCA,PDHX,KYNU,NAMPT,GPHN
GOBPID	GO:0009205	0.0430903	1.39669	25.8958	35	495	purine ribonucleoside triphosphate metabolic process	AK4,BIN1,ARF4,RND3,ARHGAP5,ATP1B1,ATP5D,BCL6,CD40,S1PR1,EIF2S3,GEM,GNA15,HTR2B,MSH2,RAB13,RGS16,RAB7L1,RAB9A,C16orf7,ACAP1,ARL4C,SPRY2,RASL10A,MRAS,RHOBTB3,KIF1B,RASGRP3,ARFGAP3,ATP2C1,RASD1,GNL3L,PID1,ADAP2,AGAP4
GOBPID	GO:0051051	0.0433671	1.57002	13.2356	20	253	negative regulation of transport	CD36,EDN1,LRRC32,ICAM1,IL1B,IL10,IRAK1,ITGAV,MAOB,MXI1,OSM,PTGS2,SNCA,TWIST1,SLC30A1,AKAP1,NCS1,INPP5K,PID1,YRDC
GOBPID	GO:0034504	0.0434519	1.61298	11.6139	18	222	protein localization to nucleus	BCL6,CD36,CDKN1A,FYB,HHEX,HES1,IGF1,IL1B,IL10,MT3,MXI1,SLC11A1,TGFBR1,TLR2,AKAP1,KANK1,GREM1,TLR7
GOBPID	GO:0000122	0.0440332	1.42486	22.4953	31	430	negative regulation of transcription from RNA polymerase II promoter	ASCL2,BACH1,BCL6,BMP2,CD36,CDKN1C,CEBPA,PLK3,EDN1,BPTF,HHEX,HES1,IRF8,NFIL3,PHB,RB1,RFX5,SKIL,SNAI1,SUPT5H,TWIST1,ZNF189,LRP8,CSDA,URI1,TRIM28,ZHX2,HEY1,HIPK2,GLIS2,GLIS3
GOBPID	GO:0002548	0.0444248	3.30585	1.36018	4	26	monocyte chemotaxis	SERPINE1,CCL3,CCL23,GREM1
GOBPID	GO:0009409	0.0444248	3.30585	1.36018	4	26	response to cold	ADM,IL18,VEGFA,CSDA
GOBPID	GO:0032648	0.0444248	3.30585	1.36018	4	26	regulation of interferon-beta production	TLR2,POLR3G,TLR7,POLR3B
GOBPID	GO:0009887	0.0447366	1.32422	37.405	48	715	organ morphogenesis	ADM,ATIC,BMP2,CCNE1,CDKN1A,CEBPA,CTSZ,EDN1,EFNB2,EPHB2,EREG,FLI1,FZD2,HHEX,HLX,HES1,HTR2B,IGF1,INSIG1,MYO5A,NAB2,NAGLU,PPAT,PRKX,PTPRM,SNAI1,STAT5A,SYK,TGFBR1,TNFAIP3,TWIST1,VEGFA,WNT5A,WNT6,NR4A3,CSDA,SPRY2,SEMA3C,HEY1,GREM1,HIPK2,INSIG2,EVL,TSHZ3,CSRNP1,SETDB2,ARID5B,PPARGC1B
GOBPID	GO:0010959	0.0447924	1.69103	9.25971	15	177	regulation of metal ion transport	ICAM1,ITGAV,MYO5A,PTGS2,CCL3,SNCA,SLC30A1,ZP3,PKD2L1,NCS1,RANGRF,INPP5K,TESC,GIMAP5,CNKSR3
GOBPID	GO:0010506	0.0451523	2.482	2.61574	6	50	regulation of autophagy	ABL2,HTR2B,MT3,SUPT5H,USP13,TP53INP2
GOBPID	GO:0051817	0.0451523	2.482	2.61574	6	50	modification of morphology or physiology of other organism involved in symbiotic interaction	ITGAV,CCL3,TLR2,TNIP1,TLR7,INPP5K
GOBPID	GO:0006364	0.0454282	1.93956	5.44073	10	104	rRNA processing	DKC1,FBL,DCAF13,FTSJ2,SBDS,NOL8,WDR12,RBFA,IMP4,WDR36
GOBPID	GO:0006638	0.0454282	1.93956	5.44073	10	104	neutral lipid metabolic process	CAT,ACSL1,ACSL4,GK,INSIG1,SLC22A4,SNCA,GPD1L,INSIG2,DGAT2
GOBPID	GO:0034976	0.0454282	1.93956	5.44073	10	104	response to endoplasmic reticulum stress	IL8,PPP2R5B,PTPN1,SSR1,HERPUD1,PPP1R15A,ERO1L,SRPRB,FAM129A,EIF2AK4
GOBPID	GO:0035967	0.0454442	2.02499	4.70832	9	90	cellular response to topologically incorrect protein	IL8,PPP2R5B,PTPN1,SSR1,HERPUD1,PPP1R15A,ERO1L,SRPRB,EIF2AK4
GOBPID	GO:0002700	0.0455615	2.2762	3.29583	7	63	regulation of production of molecular mediator of immune response	BCL6,CD36,CD40,IL10,TLR2,WNT5A,GIMAP5
GOBPID	GO:0060675	0.0455615	2.2762	3.29583	7	63	ureteric bud morphogenesis	BMP2,HES1,CITED1,VEGFA,WNT6,HS2ST1,GREM1
GOBPID	GO:0071843	0.0458379	1.57904	12.5032	19	239	cellular component biogenesis at cellular level	DDX1,DKC1,FBL,NHP2L1,OXA1L,SURF6,ZRSR2,RRS1,DCAF13,PRPF19,FTSJ2,SBDS,GNL3L,NOL8,WDR12,RBFA,EIF2A,IMP4,WDR36
GOBPID	GO:0005996	0.0464099	1.55643	13.3403	20	255	monosaccharide metabolic process	SLC37A4,GALK2,GALT,GAPDH,GBE1,IGF1,LDHA,PDK3,PFKFB3,PFKP,PGD,PMAIP1,RENBP,TPI1,DYRK2,HIBADH,CHST15,INPP5K,DDIT4,DHTKD1
GOBPID	GO:0002381	0.0465323	2.75632	1.98796	5	38	immunoglobulin production involved in immunoglobulin mediated immune response	BCL6,CD40,IL10,MSH2,SWAP70
GOBPID	GO:0006081	0.0465323	2.75632	1.98796	5	38	cellular aldehyde metabolic process	ADH5,ALDH3A2,AKR1C1,IDH2,TPI1
GOBPID	GO:0008630	0.0465323	2.75632	1.98796	5	38	DNA damage response, signal transduction resulting in induction of apoptosis	ATM,IFI16,MSH2,DYRK2,HIPK2
GOBPID	GO:0034109	0.0465323	2.75632	1.98796	5	38	homotypic cell-cell adhesion	CD44,IL1B,PIK3CG,SYK,PPAP2B
GOBPID	GO:0042116	0.0465323	2.75632	1.98796	5	38	macrophage activation	SLC11A1,SNCA,SYK,WNT5A,TLR7
GOBPID	GO:0043525	0.0465323	2.75632	1.98796	5	38	positive regulation of neuron apoptotic process	ATM,NQO1,IL18,PMAIP1,CCL3
GOBPID	GO:0050764	0.0465323	2.75632	1.98796	5	38	regulation of phagocytosis	CD36,ITGAV,SLC11A1,SYK,MERTK
GOBPID	GO:1901216	0.0465323	2.75632	1.98796	5	38	positive regulation of neuron death	ATM,NQO1,IL18,PMAIP1,CCL3
GOBPID	GO:0060485	0.0465678	1.75744	7.74258	13	148	mesenchyme development	BMP2,EDN1,HES1,HTR2B,PLAUR,SNAI1,TGFBR1,TWIST1,WNT5A,TRIM28,SEMA3C,HEY1,GREM1
GOBPID	GO:0009144	0.0474037	1.38423	26.105	35	499	purine nucleoside triphosphate metabolic process	AK4,BIN1,ARF4,RND3,ARHGAP5,ATP1B1,ATP5D,BCL6,CD40,S1PR1,EIF2S3,GEM,GNA15,HTR2B,MSH2,RAB13,RGS16,RAB7L1,RAB9A,C16orf7,ACAP1,ARL4C,SPRY2,RASL10A,MRAS,RHOBTB3,KIF1B,RASGRP3,ARFGAP3,ATP2C1,RASD1,GNL3L,PID1,ADAP2,AGAP4
GOBPID	GO:0090316	0.0475534	2.11207	4.02823	8	77	positive regulation of intracellular protein transport	IGF1,IL1B,TGFBR1,TLR2,WIPF1,KANK1,GREM1,TLR7
GOBPID	GO:0007610	0.0475745	1.39797	24.3787	33	466	behavior	CMKLR1,S1PR1,EDN1,EFNB2,CLN8,FXN,HTR2B,IL1B,IL8,IL16,IL18,MPP1,MYO5A,NAGLU,OSM,PEBP1,SERPINE1,SERPINF1,PTGS2,CCL3,SGK1,SNCA,SOD2,TBCE,VEGFA,VEGFB,WNT5A,BTG2,NR4A3,GPR124,GREM1,HIPK2,ANKH
GOBPID	GO:0001953	0.0479837	4.19307	0.837036	3	16	negative regulation of cell-matrix adhesion	BCL6,SERPINE1,SRC
GOBPID	GO:0006882	0.0479837	4.19307	0.837036	3	16	cellular zinc ion homeostasis	MT1A,MT3,SLC30A1
GOBPID	GO:0034383	0.0479837	4.19307	0.837036	3	16	low-density lipoprotein particle clearance	CD36,EHD1,DGAT2
GOBPID	GO:0042226	0.0479837	4.19307	0.837036	3	16	interleukin-6 biosynthetic process	EREG,IL1B,IL19
GOBPID	GO:0042362	0.0479837	4.19307	0.837036	3	16	fat-soluble vitamin biosynthetic process	CYP27B1,SNAI1,DHRS9
GOBPID	GO:0045191	0.0479837	4.19307	0.837036	3	16	regulation of isotype switching	BCL6,CD40,IL10
GOBPID	GO:0050718	0.0479837	4.19307	0.837036	3	16	positive regulation of interleukin-1 beta secretion	CCL3,WNT5A,PYCARD
GOBPID	GO:0055069	0.0479837	4.19307	0.837036	3	16	zinc ion homeostasis	MT1A,MT3,SLC30A1
GOBPID	GO:0060713	0.0479837	4.19307	0.837036	3	16	labyrinthine layer morphogenesis	ADM,IL10,DNAJB6
GOBPID	GO:0072678	0.0479837	4.19307	0.837036	3	16	T cell migration	PIK3CG,CCL3,WNT5A
GOBPID	GO:2001021	0.0479837	4.19307	0.837036	3	16	negative regulation of response to DNA damage stimulus	CD44,SNAI1,TWIST1
GOBPID	GO:0001820	0.0481654	7.2626	0.366203	2	7	serotonin secretion	MAOB,SYK
GOBPID	GO:0002374	0.0481654	7.2626	0.366203	2	7	cytokine secretion involved in immune response	IL10,WNT5A
GOBPID	GO:0002739	0.0481654	7.2626	0.366203	2	7	regulation of cytokine secretion involved in immune response	IL10,WNT5A
GOBPID	GO:0006268	0.0481654	7.2626	0.366203	2	7	DNA unwinding involved in replication	MCM6,RAD51
GOBPID	GO:0009111	0.0481654	7.2626	0.366203	2	7	vitamin catabolic process	CBR3,CYP27B1
GOBPID	GO:0010886	0.0481654	7.2626	0.366203	2	7	positive regulation of cholesterol storage	CD36,EHD1
GOBPID	GO:0016540	0.0481654	7.2626	0.366203	2	7	protein autoprocessing	PARP1,FXN
GOBPID	GO:0019062	0.0481654	7.2626	0.366203	2	7	viral attachment to host cell	ICAM1,PVRL2
GOBPID	GO:0019441	0.0481654	7.2626	0.366203	2	7	tryptophan catabolic process to kynurenine	IDO1,KYNU
GOBPID	GO:0019471	0.0481654	7.2626	0.366203	2	7	4-hydroxyproline metabolic process	P4HA1,P4HA2
GOBPID	GO:0033127	0.0481654	7.2626	0.366203	2	7	regulation of histone phosphorylation	IL1B,TWIST1
GOBPID	GO:0035999	0.0481654	7.2626	0.366203	2	7	tetrahydrofolate interconversion	MTHFD1,SHMT2
GOBPID	GO:0040015	0.0481654	7.2626	0.366203	2	7	negative regulation of multicellular organism growth	FXN,LGMN
GOBPID	GO:0042363	0.0481654	7.2626	0.366203	2	7	fat-soluble vitamin catabolic process	CBR3,CYP27B1
GOBPID	GO:0042368	0.0481654	7.2626	0.366203	2	7	vitamin D biosynthetic process	CYP27B1,SNAI1
GOBPID	GO:0042482	0.0481654	7.2626	0.366203	2	7	positive regulation of odontogenesis	BMP2,EDN1
GOBPID	GO:0044406	0.0481654	7.2626	0.366203	2	7	adhesion to host	ICAM1,PVRL2
GOBPID	GO:0044650	0.0481654	7.2626	0.366203	2	7	adhesion of symbiont to host cell	ICAM1,PVRL2
GOBPID	GO:0045091	0.0481654	7.2626	0.366203	2	7	regulation of retroviral genome replication	IL8,INPP5K
GOBPID	GO:0048739	0.0481654	7.2626	0.366203	2	7	cardiac muscle fiber development	MYH11,VEGFA
GOBPID	GO:0052031	0.0481654	7.2626	0.366203	2	7	modulation by symbiont of host defense response	TLR2,TLR7
GOBPID	GO:0052255	0.0481654	7.2626	0.366203	2	7	modulation by organism of defense response of other organism involved in symbiotic interaction	TLR2,TLR7
GOBPID	GO:0052509	0.0481654	7.2626	0.366203	2	7	positive regulation by symbiont of host defense response	TLR2,TLR7
GOBPID	GO:0052510	0.0481654	7.2626	0.366203	2	7	positive regulation by organism of defense response of other organism involved in symbiotic interaction	TLR2,TLR7
GOBPID	GO:0060136	0.0481654	7.2626	0.366203	2	7	embryonic process involved in female pregnancy	ACSL4,JUNB
GOBPID	GO:0060558	0.0481654	7.2626	0.366203	2	7	regulation of calcidiol 1-monooxygenase activity	CYP27B1,IL1B
GOBPID	GO:0060676	0.0481654	7.2626	0.366203	2	7	ureteric bud formation	HS2ST1,GREM1
GOBPID	GO:0060712	0.0481654	7.2626	0.366203	2	7	spongiotrophoblast layer development	ADM,ASCL2
GOBPID	GO:0070391	0.0481654	7.2626	0.366203	2	7	response to lipoteichoic acid	CD36,TLR2
GOBPID	GO:0070486	0.0481654	7.2626	0.366203	2	7	leukocyte aggregation	CD44,IL1B
GOBPID	GO:0071107	0.0481654	7.2626	0.366203	2	7	response to parathyroid hormone stimulus	IL18,CITED1
GOBPID	GO:0071223	0.0481654	7.2626	0.366203	2	7	cellular response to lipoteichoic acid	CD36,TLR2
GOBPID	GO:0071480	0.0481654	7.2626	0.366203	2	7	cellular response to gamma radiation	ATM,ATR
GOBPID	GO:0097178	0.0481654	7.2626	0.366203	2	7	ruffle assembly	KANK1,INPP5K
GOBPID	GO:2000725	0.0481654	7.2626	0.366203	2	7	regulation of cardiac muscle cell differentiation	BMP2,GREM1
GOBPID	GO:0043009	0.0481814	1.4039	23.5416	32	450	chordate embryonic development	ADM,ASCL2,ATM,BMP2,CEBPA,EDN1,KAT2A,HHEX,HES1,IL10,JUNB,MSH2,PCSK5,SKIL,SNAI1,TGFBR1,TWIST1,VEGFA,WNT5A,SLC30A1,ZP3,CSDA,DNAJB6,SEMA3C,DEAF1,TANC2,PRPF19,SBDS,ENAH,SULF2,TSHZ3,CCNB1IP1
GOBPID	GO:0022613	0.048425	1.58925	11.7708	18	225	ribonucleoprotein complex biogenesis	DDX1,DKC1,FBL,NHP2L1,SURF6,ZRSR2,RRS1,DCAF13,PRPF19,FTSJ2,SBDS,GNL3L,NOL8,WDR12,RBFA,EIF2A,IMP4,WDR36
GOBPID	GO:0071495	0.0484529	1.36271	28.7731	38	550	cellular response to endogenous stimulus	ADCY7,PARP1,CD36,CD44,CISH,AKR1C1,DUSP1,DUSP6,FZD2,NR3C1,IDE,IL1B,IL8,IL10,IL18,JUNB,MT3,SERPINB9,PPAT,PTPN1,PTPN2,SNCA,SRC,STAT5A,TGFBR1,WNT5A,NR4A3,AKAP1,NCOA1,URI1,SOCS2,SPRY2,KANK1,NPTN,INPP5K,PID1,SULF2,GNB4
GOBPID	GO:0009199	0.0485305	1.38115	26.1574	35	500	ribonucleoside triphosphate metabolic process	AK4,BIN1,ARF4,RND3,ARHGAP5,ATP1B1,ATP5D,BCL6,CD40,S1PR1,EIF2S3,GEM,GNA15,HTR2B,MSH2,RAB13,RGS16,RAB7L1,RAB9A,C16orf7,ACAP1,ARL4C,SPRY2,RASL10A,MRAS,RHOBTB3,KIF1B,RASGRP3,ARFGAP3,ATP2C1,RASD1,GNL3L,PID1,ADAP2,AGAP4
GOBPID	GO:0006767	0.0489521	2.2361	3.34814	7	64	water-soluble vitamin metabolic process	MTHFD1,SLC2A1,VNN2,VNN1,SLC23A2,NAMPT,GPHN
GOBPID	GO:0014065	0.0489521	2.2361	3.34814	7	64	phosphatidylinositol 3-kinase cascade	CAT,EDN1,FLT3,HTR2B,IGF1,PIK3CG,TWIST1
GOBPID	GO:0032479	0.0489521	2.2361	3.34814	7	64	regulation of type I interferon production	IL10,TLR2,TNFAIP3,UBA7,POLR3G,TLR7,POLR3B
GOBPID	GO:0034764	0.0489521	2.2361	3.34814	7	64	positive regulation of transmembrane transport	IL1B,TGFBR1,TLR2,ZP3,KANK1,GREM1,TLR7
GOBPID	GO:0071407	0.0490072	2.42667	2.66805	6	51	cellular response to organic cyclic compound	BMP2,CEBPA,HSP90AB1,IL1B,IL18,CCL3
GOMFID	GO:0005125	2.24086e-06	2.98512	10.5491	28	207	cytokine activity	BMP2,EDN1,CXCL1,CXCL3,IL1A,IL1B,IL8,IL10,IL16,IL18,NDP,OSM,PPBP,CCL1,CCL3,CCL15,CCL20,CCL23,CXCL6,CXCL5,VEGFA,WNT5A,CXCL14,NAMPT,EBI3,GREM1,IL19,CMTM7
GOMFID	GO:0005126	2.71364e-06	2.95172	10.651	28	209	cytokine receptor binding	CXCL1,CXCL3,IL1A,IL1B,IL8,IL10,IRAK1,OSM,PPBP,CCL1,CCL3,CCL15,CCL20,CCL23,CXCL6,CXCL5,TGFBR1,TLR5,VEGFA,VEGFB,SOCS2,TGFBRAP1,CXCL14,TRAP1,EBI3,GREM1,ERAP1,SPRED2
GOMFID	GO:0008009	2.82726e-06	6.47002	2.3952	12	47	chemokine activity	CXCL1,CXCL3,IL8,PPBP,CCL1,CCL3,CCL15,CCL20,CCL23,CXCL6,CXCL5,CXCL14
GOMFID	GO:0005515	1.39083e-05	1.36734	356.885	414	7003	protein binding	ABL2,ACADM,ADH5,ADM,PARP1,AP2A2,AP1B1,BIN1,APEX1,ARF4,ARHGAP5,ARVCF,ATIC,ATM,ATP1B1,ATP5D,ATR,BACH1,BCL6,BCS1L,BLMH,BMP2,C1QBP,CAT,SERPINH1,CCNE1,CCNG1,CD80,CD36,CD40,CD44,CD48,CDK4,CDKN1A,CDKN1C,CEBPA,CFL2,RCC1,CLU,CMKLR1,PLK3,MAP3K8,CSTA,DBP,DDX1,NQO1,DKC1,DOCK2,ARID3A,RCAN1,HBEGF,DUSP1,ECHS1,EDN1,PHC2,EFNB2,EIF2S3,CTTN,EREG,FBL,ETS2,EZH2,F5,BPTF,FCAR,FKBP4,FLT3,FNTA,FOSL2,FXN,FYB,FZD2,GAPDH,KA…
GOMFID	GO:0042379	1.9801e-05	5.14337	2.85386	12	56	chemokine receptor binding	CXCL1,CXCL3,IL8,PPBP,CCL1,CCL3,CCL15,CCL20,CCL23,CXCL6,CXCL5,CXCL14
GOMFID	GO:0005384	3.2118e-05	74.8735	0.254809	4	5	manganese ion transmembrane transporter activity	SLC11A1,TRPM2,ZP3,ATP2C1
GOMFID	GO:0005149	0.00019906	13.3821	0.611541	5	12	interleukin-1 receptor binding	IL1A,IL1B,IRAK1,TLR5,ERAP1
GOMFID	GO:0005525	0.000220298	2.01333	19.2126	36	377	GTP binding	AK4,ARF4,RND3,ARHGAP5,DOCK2,EIF2S3,FKBP4,GEM,GNA15,HSP90AB1,RAB13,RAP2B,SCG5,RAB7L1,RAB9A,ARL4C,TUBB3,RASL10A,EHD1,RAB40B,MRAS,RHOBTB3,GIMAP2,ARL5A,RASD1,GNL3L,GIMAP4,GIMAP5,RAB40C,RAP2C,SRPRB,RHOU,ARL6,RAB42,GIMAP7,RASL11A
GOMFID	GO:0019001	0.0004017	1.94323	19.8241	36	389	guanyl nucleotide binding	AK4,ARF4,RND3,ARHGAP5,DOCK2,EIF2S3,FKBP4,GEM,GNA15,HSP90AB1,RAB13,RAP2B,SCG5,RAB7L1,RAB9A,ARL4C,TUBB3,RASL10A,EHD1,RAB40B,MRAS,RHOBTB3,GIMAP2,ARL5A,RASD1,GNL3L,GIMAP4,GIMAP5,RAB40C,RAP2C,SRPRB,RHOU,ARL6,RAB42,GIMAP7,RASL11A
GOMFID	GO:0032561	0.0004017	1.94323	19.8241	36	389	guanyl ribonucleotide binding	AK4,ARF4,RND3,ARHGAP5,DOCK2,EIF2S3,FKBP4,GEM,GNA15,HSP90AB1,RAB13,RAP2B,SCG5,RAB7L1,RAB9A,ARL4C,TUBB3,RASL10A,EHD1,RAB40B,MRAS,RHOBTB3,GIMAP2,ARL5A,RASD1,GNL3L,GIMAP4,GIMAP5,RAB40C,RAP2C,SRPRB,RHOU,ARL6,RAB42,GIMAP7,RASL11A
GOMFID	GO:0005488	0.000644608	1.36035	600.176	636	11777	binding	ABCB7,ABL2,ACADM,ADCY7,ADH5,ADM,PARP1,AP2A2,AP1B1,AK4,AMPD3,BIN1,AOX1,APEX1,ARF4,RND3,ARHGAP5,ARVCF,ASCL2,ATIC,ATM,ATP1B1,ATP5D,ATR,BACH1,BCL6,BCS1L,BLMH,BMP2,ZFP36L2,C1QBP,CA12,CAT,SERPINH1,CBR1,CBR3,CCNE1,CCNG1,CD80,CD36,CD38,CD40,CD44,CD48,CDK4,CDKN1A,CDKN1C,CEBPA,CFL2,RCC1,CHI3L2,CLU,CMKLR1,PLK3,MAP3K8,VCAN,CSRP1,CSTA,CYP27B1,DBP,AKR1C1,DDX1,NQO1,DKC1,DNASE2,DOCK2,ARID3A,RCAN1,HBEGF,DUSP1,ECH…
GOMFID	GO:0016616	0.000731264	2.82897	5.8606	15	115	oxidoreductase activity, acting on the CH-OH group of donors, NAD or NADP as acceptor	ADH5,AOX1,BMP2,CBR1,CBR3,AKR1C1,HSD11B1,IDH2,IMPDH2,LDHA,PGD,DHRS9,HIBADH,PTGR1,GPD1L
GOMFID	GO:0000166	0.00101767	1.34859	121.289	153	2380	nucleotide binding	ABCB7,ABL2,ADCY7,ADH5,PARP1,AK4,AOX1,ARF4,RND3,ARHGAP5,ATM,ATP5D,ATR,BCS1L,CAT,CBR1,CBR3,CD38,CDK4,PLK3,MAP3K8,DDX1,DOCK2,EIF2S3,EPHB2,ACSL1,ACSL4,FKBP4,FLT3,GALK2,GAPDH,GEM,GK,GNA15,GTF2F2,HSD11B1,HSPA6,HSP90AB1,IDE,IDH2,IMPDH2,IRAK1,IRAK2,LDHA,LIMK2,MCM6,MAP3K5,MSH2,MTHFD1,MYH11,MYO5A,NCL,NDUFV1,NT5E,PEBP1,PDK3,PFKFB3,PFKP,PGD,PIK3C2B,PIK3CG,PRKX,RAB13,RAD51,RAD51C,RAP2B,RENBP,ABCE1,SRSF7,SGK1,…
GOMFID	GO:1901265	0.00103618	1.34787	121.34	153	2381	nucleoside phosphate binding	ABCB7,ABL2,ADCY7,ADH5,PARP1,AK4,AOX1,ARF4,RND3,ARHGAP5,ATM,ATP5D,ATR,BCS1L,CAT,CBR1,CBR3,CD38,CDK4,PLK3,MAP3K8,DDX1,DOCK2,EIF2S3,EPHB2,ACSL1,ACSL4,FKBP4,FLT3,GALK2,GAPDH,GEM,GK,GNA15,GTF2F2,HSD11B1,HSPA6,HSP90AB1,IDE,IDH2,IMPDH2,IRAK1,IRAK2,LDHA,LIMK2,MCM6,MAP3K5,MSH2,MTHFD1,MYH11,MYO5A,NCL,NDUFV1,NT5E,PEBP1,PDK3,PFKFB3,PFKP,PGD,PIK3C2B,PIK3CG,PRKX,RAB13,RAD51,RAD51C,RAP2B,RENBP,ABCE1,SRSF7,SGK1,…
GOMFID	GO:0097159	0.00105499	1.34716	121.391	153	2382	organic cyclic compound binding	ABCB7,ABL2,ADCY7,ADH5,PARP1,AK4,AOX1,ARF4,RND3,ARHGAP5,ATM,ATP5D,ATR,BCS1L,CAT,CBR1,CBR3,CD38,CDK4,PLK3,MAP3K8,DDX1,DOCK2,EIF2S3,EPHB2,ACSL1,ACSL4,FKBP4,FLT3,GALK2,GAPDH,GEM,GK,GNA15,GTF2F2,HSD11B1,HSPA6,HSP90AB1,IDE,IDH2,IMPDH2,IRAK1,IRAK2,LDHA,LIMK2,MCM6,MAP3K5,MSH2,MTHFD1,MYH11,MYO5A,NCL,NDUFV1,NT5E,PEBP1,PDK3,PFKFB3,PFKP,PGD,PIK3C2B,PIK3CG,PRKX,RAB13,RAD51,RAD51C,RAP2B,RENBP,ABCE1,SRSF7,SGK1,…
GOMFID	GO:0035639	0.00125729	1.38239	93.0052	121	1825	purine ribonucleoside triphosphate binding	ABCB7,ABL2,ADCY7,AK4,ARF4,RND3,ARHGAP5,ATM,ATP5D,ATR,BCS1L,CDK4,PLK3,MAP3K8,DDX1,DOCK2,EIF2S3,EPHB2,ACSL1,ACSL4,FKBP4,FLT3,GALK2,GEM,GK,GNA15,GTF2F2,HSPA6,HSP90AB1,IDE,IRAK1,IRAK2,LIMK2,MCM6,MAP3K5,MSH2,MTHFD1,MYH11,MYO5A,PEBP1,PDK3,PFKFB3,PFKP,PIK3C2B,PIK3CG,PRKX,RAB13,RAD51,RAD51C,RAP2B,RENBP,ABCE1,SGK1,SCG5,SLC22A4,HLTF,SRC,SYK,TGFBR1,UBA7,DYRK2,TTF2,RUVBL1,DNAH11,RAB7L1,PAPSS2,PAPSS1,RAB9A,UB…
GOMFID	GO:0017076	0.0014696	1.372	95.1965	123	1868	purine nucleotide binding	ABCB7,ABL2,ADCY7,AK4,ARF4,RND3,ARHGAP5,ATM,ATP5D,ATR,BCS1L,CDK4,PLK3,MAP3K8,DDX1,DOCK2,EIF2S3,EPHB2,ACSL1,ACSL4,FKBP4,FLT3,GALK2,GEM,GK,GNA15,GTF2F2,HSPA6,HSP90AB1,IDE,IRAK1,IRAK2,LIMK2,MCM6,MAP3K5,MSH2,MTHFD1,MYH11,MYO5A,PEBP1,PDK3,PFKFB3,PFKP,PIK3C2B,PIK3CG,PRKX,RAB13,RAD51,RAD51C,RAP2B,RENBP,ABCE1,SGK1,SCG5,SLC22A4,HLTF,SRC,SYK,TGFBR1,UBA7,DYRK2,TTF2,RUVBL1,DNAH11,RAB7L1,PAPSS2,PAPSS1,RAB9A,UB…
GOMFID	GO:0061134	0.00153237	2.19313	10.2943	21	202	peptidase regulator activity	SERPINH1,CSTA,MAP3K5,MT3,PEBP1,SERPINE1,SERPINF1,SERPINA1,SERPINB9,RENBP,SNCA,TFPI,TIMP1,TIMP2,TNFAIP3,SPINT2,TNFAIP8,PCOLCE2,PYCARD,CRIM1,LXN
GOMFID	GO:0004866	0.00165329	2.34312	8.30676	18	163	endopeptidase inhibitor activity	SERPINH1,CSTA,MT3,PEBP1,SERPINE1,SERPINF1,SERPINA1,SERPINB9,RENBP,SNCA,TFPI,TIMP1,TIMP2,TNFAIP3,SPINT2,TNFAIP8,CRIM1,LXN
GOMFID	GO:0016614	0.00187221	2.54665	6.42118	15	126	oxidoreductase activity, acting on CH-OH group of donors	ADH5,AOX1,BMP2,CBR1,CBR3,AKR1C1,HSD11B1,IDH2,IMPDH2,LDHA,PGD,DHRS9,HIBADH,PTGR1,GPD1L
GOMFID	GO:0036094	0.00187414	1.31637	130.411	161	2559	small molecule binding	ABCB7,ABL2,ADCY7,ADH5,PARP1,AK4,AOX1,ARF4,RND3,ARHGAP5,ATM,ATP5D,ATR,BCS1L,CAT,CBR1,CBR3,CD38,CDK4,PLK3,MAP3K8,DDX1,DOCK2,EIF2S3,EPHB2,ACSL1,ACSL4,FKBP4,FLT3,GALK2,GAPDH,GEM,GK,GNA15,GTF2F2,HSD11B1,HSPA6,HSP90AB1,IDE,IDH2,IMPDH2,IRAK1,IRAK2,LDHA,LIMK2,MCM6,MAP3K5,MSH2,MTHFD1,MYH11,MYO5A,NCL,NDUFV1,PNP,NT5E,P4HA1,PEBP1,PDK3,PFKFB3,PFKP,PGD,PIK3C2B,PIK3CG,PRKX,RAB13,RAD51,RAD51C,RAP2B,RENBP,ABCE1,S…
GOMFID	GO:0061135	0.00216848	2.27958	8.51061	18	167	endopeptidase regulator activity	SERPINH1,CSTA,MT3,PEBP1,SERPINE1,SERPINF1,SERPINA1,SERPINB9,RENBP,SNCA,TFPI,TIMP1,TIMP2,TNFAIP3,SPINT2,TNFAIP8,CRIM1,LXN
GOMFID	GO:0032555	0.00224728	1.35525	94.534	121	1855	purine ribonucleotide binding	ABCB7,ABL2,ADCY7,AK4,ARF4,RND3,ARHGAP5,ATM,ATP5D,ATR,BCS1L,CDK4,PLK3,MAP3K8,DDX1,DOCK2,EIF2S3,EPHB2,ACSL1,ACSL4,FKBP4,FLT3,GALK2,GEM,GK,GNA15,GTF2F2,HSPA6,HSP90AB1,IDE,IRAK1,IRAK2,LIMK2,MCM6,MAP3K5,MSH2,MTHFD1,MYH11,MYO5A,PEBP1,PDK3,PFKFB3,PFKP,PIK3C2B,PIK3CG,PRKX,RAB13,RAD51,RAD51C,RAP2B,RENBP,ABCE1,SGK1,SCG5,SLC22A4,HLTF,SRC,SYK,TGFBR1,UBA7,DYRK2,TTF2,RUVBL1,DNAH11,RAB7L1,PAPSS2,PAPSS1,RAB9A,UB…
GOMFID	GO:0032553	0.0022898	1.35436	94.585	121	1856	ribonucleotide binding	ABCB7,ABL2,ADCY7,AK4,ARF4,RND3,ARHGAP5,ATM,ATP5D,ATR,BCS1L,CDK4,PLK3,MAP3K8,DDX1,DOCK2,EIF2S3,EPHB2,ACSL1,ACSL4,FKBP4,FLT3,GALK2,GEM,GK,GNA15,GTF2F2,HSPA6,HSP90AB1,IDE,IRAK1,IRAK2,LIMK2,MCM6,MAP3K5,MSH2,MTHFD1,MYH11,MYO5A,PEBP1,PDK3,PFKFB3,PFKP,PIK3C2B,PIK3CG,PRKX,RAB13,RAD51,RAD51C,RAP2B,RENBP,ABCE1,SGK1,SCG5,SLC22A4,HLTF,SRC,SYK,TGFBR1,UBA7,DYRK2,TTF2,RUVBL1,DNAH11,RAB7L1,PAPSS2,PAPSS1,RAB9A,UB…
GOMFID	GO:0051287	0.00235571	3.84958	2.3952	8	47	NAD binding	PARP1,AOX1,GAPDH,IDH2,NDUFV1,HIBADH,GPD1L,NNT
GOMFID	GO:0002134	0.0025939	Inf	0.101924	2	2	UTP binding	HSP90AB1,MTPAP
GOMFID	GO:0004020	0.0025939	Inf	0.101924	2	2	adenylylsulfate kinase activity	PAPSS2,PAPSS1
GOMFID	GO:0004779	0.0025939	Inf	0.101924	2	2	sulfate adenylyltransferase activity	PAPSS2,PAPSS1
GOMFID	GO:0004781	0.0025939	Inf	0.101924	2	2	sulfate adenylyltransferase (ATP) activity	PAPSS2,PAPSS1
GOMFID	GO:0008513	0.0025939	Inf	0.101924	2	2	secondary active organic cation transmembrane transporter activity	SLC22A1,SLC22A4
GOMFID	GO:0033677	0.0025939	Inf	0.101924	2	2	DNA/RNA helicase activity	DDX1,PIF1
GOMFID	GO:0043183	0.0025939	Inf	0.101924	2	2	vascular endothelial growth factor receptor 1 binding	VEGFA,VEGFB
GOMFID	GO:0030414	0.00263798	2.23412	8.66349	18	170	peptidase inhibitor activity	SERPINH1,CSTA,MT3,PEBP1,SERPINE1,SERPINF1,SERPINA1,SERPINB9,RENBP,SNCA,TFPI,TIMP1,TIMP2,TNFAIP3,SPINT2,TNFAIP8,CRIM1,LXN
GOMFID	GO:0000982	0.00276042	3.13141	3.56732	10	70	RNA polymerase II core promoter proximal region sequence-specific DNA binding transcription factor activity	BACH1,DBP,HES1,NFIL3,PLAGL2,SNAI1,BTG2,NR4A3,ARNTL2,GLIS2
GOMFID	GO:0017017	0.00330635	8.31465	0.662502	4	13	MAP kinase tyrosine/serine/threonine phosphatase activity	DUSP1,DUSP4,DUSP5,DUSP6
GOMFID	GO:0070851	0.0034433	2.68662	4.89233	12	96	growth factor receptor binding	HBEGF,EREG,IL1A,IL1B,IL10,IRAK1,TLR5,VEGFA,VEGFB,GREM1,NPTN,ERAP1
GOMFID	GO:0043027	0.00348853	5.85101	1.0702	5	21	cysteine-type endopeptidase inhibitor activity involved in apoptotic process	MT3,SERPINB9,SNCA,TNFAIP3,TNFAIP8
GOMFID	GO:0005172	0.00395384	14.0176	0.356732	3	7	vascular endothelial growth factor receptor binding	VEGFA,VEGFB,GREM1
GOMFID	GO:0033549	0.0044441	7.48266	0.713464	4	14	MAP kinase phosphatase activity	DUSP1,DUSP4,DUSP5,DUSP6
GOMFID	GO:0005102	0.00459441	1.40356	59.0646	79	1159	receptor binding	ADM,BMP2,CAT,CCNE1,DOCK2,HBEGF,EDN1,EFNB2,EREG,ETS2,FKBP4,FYB,GNA15,CXCL1,CXCL3,ICAM1,IDE,IGF1,IL1A,IL1B,IL8,IL10,IL16,IL18,IRAK1,ITGB8,NDP,OSM,PEBP1,SERPINE1,PIK3CG,PPBP,PTPN1,RB1,S100A12,CCL1,CCL3,CCL15,CCL20,CCL23,CXCL6,CXCL5,SRC,SYK,SYT1,TGFBR1,TIMP2,TLR5,VEGFA,VEGFB,WNT5A,WNT6,PPAP2B,NCOA1,SOCS2,HMGN3,TGFBRAP1,CXCL14,MTSS1,SRA1,TRAP1,NAMPT,EBI3,SEMA3C,FBLN5,FGL2,GABARAPL1,GREM1,NPTN,BLNK,IL1…
GOMFID	GO:0043028	0.00492169	3.74948	2.14039	7	42	cysteine-type endopeptidase regulator activity involved in apoptotic process	MAP3K5,MT3,SERPINB9,SNCA,TNFAIP3,TNFAIP8,PYCARD
GOMFID	GO:0004857	0.00558832	1.77924	16.002	27	314	enzyme inhibitor activity	SERPINH1,CDKN1A,CDKN1C,CSTA,MT3,PEBP1,SERPINE1,SERPINF1,SERPINA1,SERPINB9,RENBP,ABCE1,SCG5,SNCA,TFPI,TIMP1,TIMP2,TNFAIP3,URI1,SPRY2,SPINT2,CABIN1,TNFAIP8,CRIM1,TESC,LXN,SPRED2
GOMFID	GO:0004726	0.00608777	11.2133	0.407694	3	8	non-membrane spanning protein tyrosine phosphatase activity	DUSP1,PTPN2,PTPN4
GOMFID	GO:0046870	0.00608777	11.2133	0.407694	3	8	cadmium ion binding	MT1A,MT1E,MT3
GOMFID	GO:0050662	0.00609343	2.04368	9.37696	18	184	coenzyme binding	ACADM,PARP1,AOX1,CAT,CBR3,GAPDH,IDH2,MAOB,ALDH6A1,NDUFV1,PGD,HIBADH,GPD1L,NNT,MTO1,ERO1L,DHTKD1,ERO1LB
GOMFID	GO:0016763	0.00640301	3.54631	2.24232	7	44	transferase activity, transferring pentosyl groups	PARP1,PNP,PPAT,UPP1,NAMPT,C6orf108,QTRT1
GOMFID	GO:0046915	0.0064211	4.92614	1.22308	5	24	transition metal ion transmembrane transporter activity	SLC11A1,TRPM2,SLC30A1,ZP3,ATP2C1
GOMFID	GO:0042056	0.00744968	6.23468	0.815388	4	16	chemoattractant activity	CCL3,CCL15,VEGFA,VEGFB
GOMFID	GO:0004616	0.00751797	37.3394	0.152885	2	3	phosphogluconate dehydrogenase (decarboxylating) activity	PGD,HIBADH
GOMFID	GO:0017159	0.00751797	37.3394	0.152885	2	3	pantetheine hydrolase activity	VNN2,VNN1
GOMFID	GO:0032557	0.00751797	37.3394	0.152885	2	3	pyrimidine ribonucleotide binding	HSP90AB1,MTPAP
GOMFID	GO:0001664	0.00757549	1.99503	9.58081	18	188	G-protein coupled receptor binding	ADM,EDN1,GNA15,CXCL1,CXCL3,IL8,NDP,PPBP,CCL1,CCL3,CCL15,CCL20,CCL23,CXCL6,CXCL5,WNT5A,WNT6,CXCL14
GOMFID	GO:0003824	0.00789208	1.20554	270.148	302	5301	catalytic activity	ABCB7,ABL2,ACADM,ADCY7,ADH5,PARP1,AHCY,AK4,ALDH3A2,AMPD3,AOX1,APEX1,ARF4,RND3,ARHGAP5,ATIC,ATM,ATP1B1,ATP5D,ATR,BCAT1,BCS1L,BLMH,BMP2,CA12,CASP5,CAT,CBR1,CBR3,CCNE1,CD38,CD44,CDK4,CDKN1A,CHI3L2,PLK3,MAP3K8,CTSZ,CYP27B1,AKR1C1,DDX1,NQO1,DKC1,DNASE2,DUSP1,DUSP4,DUSP5,DUSP6,ECHS1,EIF2S3,EPHB2,FBL,EZH2,ACSL1,ACSL4,BPTF,FKBP4,FLT3,FNTA,FXN,GALK2,GALNT2,GALT,GAPDH,GBE1,KAT2A,GEM,GK,GNA15,GSTM3,GTF2F2,H…
GOMFID	GO:0004022	0.0087885	9.34375	0.458656	3	9	alcohol dehydrogenase (NAD) activity	ADH5,DHRS9,PTGR1
GOMFID	GO:0046983	0.0110585	1.43075	39.3425	54	772	protein dimerization activity	ADH5,BIN1,ATIC,ATM,BACH1,BMP2,CAT,CEBPA,DBP,ARID3A,FLT3,FOSL2,FZD2,GSTM3,HHEX,HES1,IDE,IRAK1,IRAK2,JUNB,MAOB,MCL1,MAP3K5,MGST1,CITED1,MSH2,NCF4,NDP,NFIL3,OXA1L,PTGS2,PVRL2,RENBP,SLC11A1,SRM,SUPT5H,TGFBR1,TLR2,TWIST1,VEGFA,VEGFB,KYNU,UBA2,ZHX2,GPD1L,TIMM9,PYCARD,NRBP1,TESC,MTPAP,MTERFD3,DGAT2,CREB3L4,EIF2AK4
GOMFID	GO:0042802	0.0111057	1.42107	41.0752	56	806	identical protein binding	ACADM,ADH5,ATIC,BMP2,CAT,CEBPA,ARID3A,FLT3,GSTM3,HHEX,HES1,IDE,IRAK1,IRAK2,LTBR,MAOB,MCM6,MAP3K5,MGST1,CITED1,MSH2,NDP,OXA1L,PON2,PTGS2,PVRL2,RAD51,RENBP,SHMT2,SLC2A1,SLC11A1,SNCA,SOD2,SRM,SYT1,TWIST1,VEGFA,VEGFB,KYNU,NOL3,PKD2L1,PAICS,ZHX2,GPD1L,ATXN10,TIMM9,PRPF19,PYCARD,NRBP1,TESC,MTPAP,MTERFD3,DGAT2,E2F7,RILPL2,EIF2AK4
GOMFID	GO:0015491	0.0115516	5.34327	0.917311	4	18	cation:cation antiporter activity	SLC8A3,SLC9A5,SLC11A1,SLC22A4
GOMFID	GO:0016798	0.012469	2.23175	5.75868	12	113	hydrolase activity, acting on glycosyl bonds	APEX1,CD38,CD44,CHI3L2,GBE1,NAGLU,NTHL1,C6orf108,SMPDL3A,ABHD10,GLB1L,HEXDC
GOMFID	GO:0030145	0.0133001	3.40463	1.98751	6	39	manganese ion binding	ABL2,GALNT2,SOD2,DYRK2,ATP2C1,MTPAP
GOMFID	GO:0016799	0.0140535	4.9867	0.968273	4	19	hydrolase activity, hydrolyzing N-glycosyl compounds	APEX1,CD38,NTHL1,C6orf108
GOMFID	GO:0019200	0.0140535	4.9867	0.968273	4	19	carbohydrate kinase activity	GALK2,PFKFB3,PFKP,NAGK
GOMFID	GO:0004090	0.0145286	18.6684	0.203847	2	4	carbonyl reductase (NADPH) activity	CBR1,CBR3
GOMFID	GO:0004656	0.0145286	18.6684	0.203847	2	4	procollagen-proline 4-dioxygenase activity	P4HA1,P4HA2
GOMFID	GO:0031545	0.0145286	18.6684	0.203847	2	4	peptidyl-proline 4-dioxygenase activity	P4HA1,P4HA2
GOMFID	GO:0042577	0.0145286	18.6684	0.203847	2	4	lipid phosphatase activity	PPAP2B,INPP5K
GOMFID	GO:0043142	0.0145286	18.6684	0.203847	2	4	single-stranded DNA-dependent ATPase activity	RAD51,PIF1
GOMFID	GO:0043184	0.0145286	18.6684	0.203847	2	4	vascular endothelial growth factor receptor 2 binding	VEGFA,GREM1
GOMFID	GO:0070053	0.0145286	18.6684	0.203847	2	4	thrombospondin receptor activity	CD36,SDC4
GOMFID	GO:0030546	0.0145494	3.8985	1.47789	5	29	receptor activator activity	VEGFA,WNT5A,SRA1,GREM1,PPARGC1B
GOMFID	GO:0003924	0.0145912	1.78555	11.7722	20	231	GTPase activity	ARF4,RND3,ARHGAP5,EIF2S3,GEM,GNA15,RAB13,RAP2B,RAB7L1,RAB9A,ARL4C,TUBB3,RASL10A,EHD1,MRAS,RASD1,GNL3L,RAP2C,RHOU,RASL11A
GOMFID	GO:0016903	0.0149917	3.30427	2.03847	6	40	oxidoreductase activity, acting on the aldehyde or oxo group of donors	ADH5,ALDH3A2,AOX1,GAPDH,ALDH6A1,DHTKD1
GOMFID	GO:0042803	0.0151856	1.49213	27.2136	39	534	protein homodimerization activity	ADH5,ATIC,BMP2,CAT,CEBPA,ARID3A,FLT3,GSTM3,HHEX,HES1,IDE,IRAK1,IRAK2,MAOB,MAP3K5,MGST1,CITED1,MSH2,NDP,OXA1L,PTGS2,PVRL2,RENBP,SLC11A1,SRM,TWIST1,VEGFA,VEGFB,KYNU,ZHX2,GPD1L,TIMM9,PYCARD,NRBP1,TESC,MTPAP,MTERFD3,DGAT2,EIF2AK4
GOMFID	GO:0008191	0.0159952	7.00684	0.560579	3	11	metalloendopeptidase inhibitor activity	TIMP1,TIMP2,LXN
GOMFID	GO:0016861	0.0159952	7.00684	0.560579	3	11	intramolecular oxidoreductase activity, interconverting aldoses and ketoses	RENBP,TPI1,GNPDA1
GOMFID	GO:0048551	0.0159952	7.00684	0.560579	3	11	metalloenzyme inhibitor activity	TIMP1,TIMP2,LXN
GOMFID	GO:0043498	0.0173841	2.85067	2.70097	7	53	cell surface binding	CD36,CD48,HBEGF,ICAM1,NDP,TLR2,VEGFA
GOMFID	GO:0030291	0.0200232	4.39942	1.0702	4	21	protein serine/threonine kinase inhibitor activity	CDKN1A,CDKN1C,SPRY2,SPRED2
GOMFID	GO:0005355	0.0205321	6.22787	0.611541	3	12	glucose transmembrane transporter activity	PPBP,SLC2A1,SLC2A14
GOMFID	GO:0010576	0.0205321	6.22787	0.611541	3	12	metalloenzyme regulator activity	TIMP1,TIMP2,LXN
GOMFID	GO:0035004	0.0205321	6.22787	0.611541	3	12	phosphatidylinositol 3-kinase activity	ATM,PIK3C2B,PIK3CG
GOMFID	GO:0050431	0.0205321	6.22787	0.611541	3	12	transforming growth factor beta binding	CD36,ITGAV,TGFBR1
GOMFID	GO:0004177	0.0217745	3.46461	1.63078	5	32	aminopeptidase activity	BLMH,LTA4H,METAP1,ERAP1,ERAP2
GOMFID	GO:0008330	0.0234008	12.4447	0.254809	2	5	protein tyrosine/threonine phosphatase activity	DUSP1,DUSP4
GOMFID	GO:0008429	0.0234008	12.4447	0.254809	2	5	phosphatidylethanolamine binding	PEBP1,MAP1LC3A
GOMFID	GO:0019238	0.0234008	12.4447	0.254809	2	5	cyclohydrolase activity	ATIC,MTHFD1
GOMFID	GO:0032405	0.0234008	12.4447	0.254809	2	5	MutLalpha complex binding	ATR,MSH2
GOMFID	GO:0051637	0.0234008	12.4447	0.254809	2	5	Gram-positive bacterial cell surface binding	CD36,TLR2
GOMFID	GO:0046875	0.023511	4.15472	1.12116	4	22	ephrin receptor binding	EFNB2,PIK3CG,PTPN1,SRC
GOMFID	GO:0008094	0.0236023	2.45743	3.51636	8	69	DNA-dependent ATPase activity	BPTF,MCM6,MSH2,RAD51,RAD51C,TTF2,PIF1,TOP1MT
GOMFID	GO:0015145	0.0256999	5.60469	0.662502	3	13	monosaccharide transmembrane transporter activity	PPBP,SLC2A1,SLC2A14
GOMFID	GO:0015149	0.0256999	5.60469	0.662502	3	13	hexose transmembrane transporter activity	PPBP,SLC2A1,SLC2A14
GOMFID	GO:0015298	0.0273445	3.93577	1.17212	4	23	solute:cation antiporter activity	SLC8A3,SLC9A5,SLC11A1,SLC22A4
GOMFID	GO:0016787	0.0295961	1.20831	119.76	139	2350	hydrolase activity	ABCB7,AHCY,AMPD3,APEX1,ARF4,RND3,ARHGAP5,ATIC,ATP1B1,ATP5D,BCS1L,BLMH,CASP5,CAT,CD38,CD44,CHI3L2,CTSZ,DDX1,DNASE2,DUSP1,DUSP4,DUSP5,DUSP6,EIF2S3,BPTF,GBE1,GEM,GNA15,GTF2F2,HTR2B,IDE,LTA4H,MCM6,MMP1,MMP10,MMP12,MMP19,MSH2,MTHFD1,MYH11,MYO5A,NAGLU,NT5E,NTHL1,PCSK5,PFKFB3,PON2,PPP3CC,LGMN,PTPN1,PTPN2,PTPN4,PTPRM,RAB13,RAD51,RAD51C,RAP2B,RARRES3,ABCE1,HLTF,TNFAIP3,TPSAB1,TRPM2,TTF2,RUVBL1,PPAP2A,PPAP…
GOMFID	GO:0008198	0.0314969	5.09481	0.713464	3	14	ferrous iron binding	FXN,NT5E,SNCA
GOMFID	GO:0015929	0.0314969	5.09481	0.713464	3	14	hexosaminidase activity	CD44,NAGLU,HEXDC
GOMFID	GO:0030228	0.0314969	5.09481	0.713464	3	14	lipoprotein particle receptor activity	CD36,LRP8,LRP12
GOMFID	GO:0048018	0.0314969	5.09481	0.713464	3	14	receptor agonist activity	VEGFA,WNT5A,GREM1
GOMFID	GO:0031490	0.0315292	3.73872	1.22308	4	24	chromatin DNA binding	APEX1,BCL6,RCC1,HMGN3
GOMFID	GO:0030234	0.0328735	1.30953	48.1588	61	945	enzyme regulator activity	ARHGAP5,BMP2,SERPINH1,CCNE1,CDKN1A,CDKN1C,RCC1,CSTA,DOCK2,CXCL1,HSP90AB1,HTR2B,MAP3K5,MT3,PEBP1,SERPINE1,SERPINF1,SERPINA1,SERPINB9,PPP2R5B,PPP2R5D,RENBP,RGS16,ABCE1,CCL3,SCG5,SNCA,TFPI,TIMP1,TIMP2,TNFAIP3,BCAR3,URI1,TGFBRAP1,C16orf7,ARHGAP32,ACAP1,DNAJB6,UBA2,SPRY2,SPINT2,TBC1D9,ARHGEF18,CABIN1,PSD4,RASGRP3,TNFAIP8,ARFGAP3,PCOLCE2,RANGRF,PYCARD,CRIM1,TESC,ARHGAP17,ADAP2,LXN,ARHGAP20,ARHGAP22,AGA…
GOMFID	GO:0001846	0.0339272	9.3329	0.30577	2	6	opsonin binding	C1QBP,ITGAV
GOMFID	GO:0008649	0.0339272	9.3329	0.30577	2	6	rRNA methyltransferase activity	DIMT1,FTSJ2
GOMFID	GO:0015651	0.0339272	9.3329	0.30577	2	6	quaternary ammonium group transmembrane transporter activity	SLC22A1,SLC22A4
GOMFID	GO:0016889	0.0339272	9.3329	0.30577	2	6	endodeoxyribonuclease activity, producing 3'-phosphomonoesters	DNASE2,RAD51C
GOMFID	GO:0019103	0.0339272	9.3329	0.30577	2	6	pyrimidine nucleotide binding	HSP90AB1,MTPAP
GOMFID	GO:0030346	0.0339272	9.3329	0.30577	2	6	protein phosphatase 2B binding	AKAP1,CABIN1
GOMFID	GO:0031726	0.0339272	9.3329	0.30577	2	6	CCR1 chemokine receptor binding	CCL3,CCL23
GOMFID	GO:0050656	0.0339272	9.3329	0.30577	2	6	3'-phosphoadenosine 5'-phosphosulfate binding	CHST15,GAL3ST4
GOMFID	GO:0016462	0.0344255	1.33474	40.2598	52	790	pyrophosphatase activity	ABCB7,ARF4,RND3,ARHGAP5,ATP1B1,ATP5D,BCS1L,DDX1,EIF2S3,BPTF,GEM,GNA15,GTF2F2,IDE,MCM6,MSH2,MYH11,MYO5A,RAB13,RAD51,RAD51C,RAP2B,ABCE1,HLTF,TRPM2,TTF2,RUVBL1,DNAH11,RAB7L1,RAB9A,ENTPD4,ABCC5,ARL4C,TUBB3,ATP8A1,RASL10A,EHD1,AFG3L2,MRAS,RHOBTB3,KIF1B,ATP2C1,RASD1,GNL3L,DDX27,RAP2C,RHOU,PIF1,C3orf26,LONRF1,TOP1MT,RASL11A
GOMFID	GO:0001078	0.0360688	3.56044	1.27404	4	25	RNA polymerase II core promoter proximal region sequence-specific DNA binding transcription factor activity involved in negative regulation of transcription	BACH1,HES1,NFIL3,SNAI1
GOMFID	GO:0001227	0.0360688	3.56044	1.27404	4	25	RNA polymerase II transcription regulatory region sequence-specific DNA binding transcription factor activity involved in negative regulation of transcription	BACH1,HES1,NFIL3,SNAI1
GOMFID	GO:0016818	0.0365007	1.32904	40.4127	52	793	hydrolase activity, acting on acid anhydrides, in phosphorus-containing anhydrides	ABCB7,ARF4,RND3,ARHGAP5,ATP1B1,ATP5D,BCS1L,DDX1,EIF2S3,BPTF,GEM,GNA15,GTF2F2,IDE,MCM6,MSH2,MYH11,MYO5A,RAB13,RAD51,RAD51C,RAP2B,ABCE1,HLTF,TRPM2,TTF2,RUVBL1,DNAH11,RAB7L1,RAB9A,ENTPD4,ABCC5,ARL4C,TUBB3,ATP8A1,RASL10A,EHD1,AFG3L2,MRAS,RHOBTB3,KIF1B,ATP2C1,RASD1,GNL3L,DDX27,RAP2C,RHOU,PIF1,C3orf26,LONRF1,TOP1MT,RASL11A
GOMFID	GO:0017111	0.0370914	1.33502	38.68	50	759	nucleoside-triphosphatase activity	ABCB7,ARF4,RND3,ARHGAP5,ATP1B1,ATP5D,BCS1L,DDX1,EIF2S3,BPTF,GEM,GNA15,GTF2F2,IDE,MCM6,MSH2,MYH11,MYO5A,RAB13,RAD51,RAD51C,RAP2B,ABCE1,HLTF,TTF2,RUVBL1,DNAH11,RAB7L1,RAB9A,ABCC5,ARL4C,TUBB3,ATP8A1,RASL10A,EHD1,AFG3L2,MRAS,RHOBTB3,KIF1B,ATP2C1,RASD1,GNL3L,DDX27,RAP2C,RHOU,PIF1,C3orf26,LONRF1,TOP1MT,RASL11A
GOMFID	GO:0016817	0.0386716	1.32339	40.5655	52	796	hydrolase activity, acting on acid anhydrides	ABCB7,ARF4,RND3,ARHGAP5,ATP1B1,ATP5D,BCS1L,DDX1,EIF2S3,BPTF,GEM,GNA15,GTF2F2,IDE,MCM6,MSH2,MYH11,MYO5A,RAB13,RAD51,RAD51C,RAP2B,ABCE1,HLTF,TRPM2,TTF2,RUVBL1,DNAH11,RAB7L1,RAB9A,ENTPD4,ABCC5,ARL4C,TUBB3,ATP8A1,RASL10A,EHD1,AFG3L2,MRAS,RHOBTB3,KIF1B,ATP2C1,RASD1,GNL3L,DDX27,RAP2C,RHOU,PIF1,C3orf26,LONRF1,TOP1MT,RASL11A
GOMFID	GO:0016740	0.0396386	1.22091	88.1638	104	1730	transferase activity	ABL2,PARP1,AK4,ATIC,ATM,ATR,BCAT1,CCNE1,CDK4,CDKN1A,PLK3,MAP3K8,DKC1,EPHB2,FBL,EZH2,FLT3,FNTA,GALK2,GALNT2,GALT,GAPDH,GBE1,KAT2A,GK,GSTM3,IRAK1,IRAK2,LIMK2,MAP3K5,MFNG,MGST1,MPP1,PNP,PDK3,PFKFB3,PFKP,PIK3C2B,PIK3CG,POLB,PPAT,PRKX,CCL3,SGK1,SHMT2,ST3GAL2,SRC,SRM,SYK,TGFBR1,UPP1,PRDM2,PDHX,DYRK2,ASMTL,NCOA1,PAPSS2,PAPSS1,CHST2,HS2ST1,HS3ST3B1,NAMPT,TRIM28,GPHN,ST3GAL6,MERTK,C6orf108,ST6GALNAC2,POLR…
GOMFID	GO:0002020	0.0405817	2.55152	2.54809	6	50	protease binding	CSTA,SERPINE1,SERPINA1,SERPINB9,TNFAIP3,CRADD
GOMFID	GO:0004869	0.0405817	2.55152	2.54809	6	50	cysteine-type endopeptidase inhibitor activity	CSTA,MT3,SERPINB9,SNCA,TNFAIP3,TNFAIP8
GOMFID	GO:0043022	0.0409656	3.39836	1.325	4	26	ribosome binding	OXA1L,SBDS,NAA15,EIF2A
GOMFID	GO:0030554	0.0416291	1.23163	77.207	92	1515	adenyl nucleotide binding	ABCB7,ABL2,ADCY7,AK4,ATM,ATP5D,ATR,BCS1L,CDK4,PLK3,MAP3K8,DDX1,EPHB2,ACSL1,ACSL4,FKBP4,FLT3,GALK2,GK,GTF2F2,HSPA6,HSP90AB1,IDE,IRAK1,IRAK2,LIMK2,MCM6,MAP3K5,MSH2,MTHFD1,MYH11,MYO5A,PEBP1,PDK3,PFKFB3,PFKP,PIK3C2B,PIK3CG,PRKX,RAD51,RAD51C,RENBP,ABCE1,SGK1,SLC22A4,HLTF,SRC,SYK,TGFBR1,UBA7,DYRK2,TTF2,RUVBL1,DNAH11,PAPSS2,PAPSS1,UBA2,ABCC5,TRAP1,GPHN,ATP8A1,MERTK,TIMM44,PAICS,CAMKK2,PMVK,EHD1,AFG3L2,R…
GOMFID	GO:0005524	0.0423948	1.23297	75.4234	90	1480	ATP binding	ABCB7,ABL2,ADCY7,AK4,ATM,ATP5D,ATR,BCS1L,CDK4,PLK3,MAP3K8,DDX1,EPHB2,ACSL1,ACSL4,FKBP4,FLT3,GALK2,GK,GTF2F2,HSPA6,HSP90AB1,IDE,IRAK1,IRAK2,LIMK2,MCM6,MAP3K5,MSH2,MTHFD1,MYH11,MYO5A,PEBP1,PDK3,PFKFB3,PFKP,PIK3C2B,PIK3CG,PRKX,RAD51,RAD51C,RENBP,ABCE1,SGK1,SLC22A4,HLTF,SRC,SYK,TGFBR1,UBA7,DYRK2,TTF2,RUVBL1,DNAH11,PAPSS2,PAPSS1,UBA2,ABCC5,TRAP1,GPHN,ATP8A1,MERTK,TIMM44,PAICS,CAMKK2,PMVK,EHD1,AFG3L2,R…
GOMFID	GO:0048037	0.0424843	1.57324	13.1991	20	259	cofactor binding	ACADM,PARP1,AOX1,CAT,CBR3,GAPDH,IDH2,MAOB,ALDH6A1,NDUFV1,PGD,SHMT2,KYNU,HIBADH,GPD1L,NNT,MTO1,ERO1L,DHTKD1,ERO1LB
GOMFID	GO:0008443	0.0459165	7.4658	0.356732	2	7	phosphofructokinase activity	PFKFB3,PFKP
GOMFID	GO:0015205	0.0459165	7.4658	0.356732	2	7	nucleobase transmembrane transporter activity	AQP9,SLC23A2
GOMFID	GO:0019798	0.0459165	7.4658	0.356732	2	7	procollagen-proline dioxygenase activity	P4HA1,P4HA2
GOMFID	GO:0031492	0.0459165	7.4658	0.356732	2	7	nucleosomal DNA binding	RCC1,HMGN3
GOMFID	GO:0048156	0.0459165	7.4658	0.356732	2	7	tau protein binding	FKBP4,SNCA
GOMFID	GO:0051371	0.0459165	7.4658	0.356732	2	7	muscle alpha-actinin binding	PKD2L1,PALLD
GOCCID	GO:0005737	4.07026e-11	1.6096	432.226	523	8885	cytoplasm	ABCB7,ABL2,ACADM,ADH5,ADM,AP2A2,AP1B1,AHCY,AK4,ALDH3A2,AMPD3,BIN1,AOX1,APEX1,ARF4,RND3,ARHGAP5,ARVCF,ASCL2,ATIC,ATM,ATP5D,BACH1,BCAT1,BCS1L,BLMH,BMP2,ZFP36L2,C1QBP,C11orf2,TMEM50B,CAT,SERPINH1,CBR1,CBR3,CCNE1,CCNG1,CD36,CD68,CDK4,CDKN1A,CDKN1C,CFL2,RCC1,CISH,CLU,PLK3,MAP3K8,CSTA,CTSZ,CYP27B1,AKR1C1,DDX1,NQO1,DKC1,DNASE2,DOCK2,ARID3A,RCAN1,DUSP6,ECHS1,EDN1,EIF2S3,CTTN,CLN8,F5,ACSL1,ACSL4,BPTF,FKBP…
GOCCID	GO:0044444	2.80917e-09	1.52434	317.177	398	6520	cytoplasmic part	ABCB7,ABL2,ACADM,ADH5,AP2A2,AP1B1,AHCY,AK4,ALDH3A2,AMPD3,BIN1,APEX1,ARF4,RND3,ARHGAP5,ATIC,ATM,ATP5D,BACH1,BCAT1,BCS1L,BLMH,C1QBP,C11orf2,TMEM50B,CAT,SERPINH1,CBR3,CCNE1,CCNG1,CD36,CD68,CDK4,CDKN1A,CISH,CLU,PLK3,MAP3K8,CTSZ,CYP27B1,AKR1C1,DDX1,NQO1,DNASE2,DOCK2,DUSP6,ECHS1,EIF2S3,CTTN,CLN8,F5,ACSL1,ACSL4,FKBP4,FLT3,FNTA,FXN,FYB,SLC37A4,GALNT2,GALT,GAPDH,GBE1,GJB2,GK,NR3C1,HSD11B1,HSP90AB1,ICA1,IR…
GOCCID	GO:0005739	3.75081e-09	1.89461	70.5378	120	1450	mitochondrion	ABCB7,ACADM,ADH5,AK4,APEX1,ATIC,ATP5D,BCS1L,C1QBP,CAT,CLU,CYP27B1,ECHS1,CLN8,ACSL1,ACSL4,FXN,GK,NR3C1,HSP90AB1,IDE,IDH2,LDHA,LIMK2,MXD1,MAOB,MCL1,MGST1,ALDH6A1,MTHFD1,NDUFV1,NTHL1,OXA1L,P4HA1,PEBP1,PDK3,PHB,PMAIP1,PON2,RAD51,RAD51C,ABCE1,SGK1,SHMT2,SLC8A3,SLC22A4,SNCA,SOD2,SRC,TTC3,PDHX,AKAP1,C21orf33,URI1,KYNU,TSFM,LRPPRC,TRAP1,TIMM44,AFG3L2,HIBADH,MRPL3,KIF1B,MRPS27,NNT,SAMM50,MTO1,LETMD1,CLIC4…
GOCCID	GO:0005622	2.3857e-05	1.41551	599.912	650	12332	intracellular	ABCB7,ABL2,ACADM,ADCY7,ADH5,ADM,PARP1,AP2A2,AP1B1,AHCY,AK4,ALDH3A2,AMPD3,BIN1,AOX1,APEX1,AQP9,ARF4,RND3,ARHGAP5,ARVCF,ASCL2,ATIC,ATM,ATP5D,ATR,BACH1,BCAT1,BCL6,BCS1L,BLMH,BMP2,ZFP36L2,C1QBP,C11orf2,TMEM50B,CASP5,CAT,SERPINH1,CBR1,CBR3,CCNE1,CCNG1,CD80,CD36,CD38,CD40,CD68,CDK4,CDKN1A,CDKN1C,CEBPA,CFL2,RCC1,CISH,CLU,PLK3,MAP3K8,CSRP1,CSTA,CTSZ,CYP27B1,DBP,AKR1C1,DDX1,NQO1,DKC1,DNASE2,DOCK2,ARID3A,R…
GOCCID	GO:0005811	2.50002e-05	6.17408	2.04316	10	42	lipid particle	ACSL4,GAPDH,IRAK1,AKAP1,EHD1,CKAP4,METTL7A,PRPF19,G0S2,DGAT2
GOCCID	GO:0044429	2.96388e-05	1.84469	34.9284	60	718	mitochondrial part	ABCB7,ACADM,AK4,ATP5D,BCS1L,C1QBP,CAT,CLU,CYP27B1,ECHS1,ACSL1,ACSL4,FXN,GK,NR3C1,IDH2,MAOB,MCL1,MGST1,ALDH6A1,NDUFV1,OXA1L,PEBP1,PDK3,PHB,PMAIP1,RAD51,SHMT2,SOD2,SRC,PDHX,AKAP1,LRPPRC,TIMM44,AFG3L2,HIBADH,MRPL3,NNT,SAMM50,LETMD1,TIMM9,SLC25A37,MRPL48,GIMAP5,PARL,ADAP2,MRS2,NLN,MRPS25,MRPS9,NARS2,COQ10B,MTERFD3,CHCHD6,COQ10A,TOP1MT,SFXN2,SFXN4,EARS2,SLC25A43
GOCCID	GO:0031091	0.000129952	4.43602	2.9188	11	60	platelet alpha granule	CD36,CLU,F5,IGF1,SERPINE1,SERPINA1,PPBP,SNCA,TIMP1,VEGFA,VEGFB
GOCCID	GO:0044424	0.000152735	1.34825	583.274	629	11990	intracellular part	ABCB7,ABL2,ACADM,ADH5,ADM,PARP1,AP2A2,AP1B1,AHCY,AK4,ALDH3A2,AMPD3,BIN1,AOX1,APEX1,AQP9,ARF4,RND3,ARHGAP5,ARVCF,ASCL2,ATIC,ATM,ATP5D,ATR,BACH1,BCAT1,BCL6,BCS1L,BLMH,BMP2,ZFP36L2,C1QBP,C11orf2,TMEM50B,CAT,SERPINH1,CBR1,CBR3,CCNE1,CCNG1,CD36,CD38,CD40,CD68,CDK4,CDKN1A,CDKN1C,CEBPA,CFL2,RCC1,CISH,CLU,PLK3,MAP3K8,CSRP1,CSTA,CTSZ,CYP27B1,DBP,AKR1C1,DDX1,NQO1,DKC1,DNASE2,DOCK2,ARID3A,RCAN1,DUSP1,DUSP4,…
GOCCID	GO:0005615	0.000203722	1.67578	40.62	64	835	extracellular space	ADM,BMP2,C1QBP,CHI3L2,CLU,VCAN,CTSZ,HBEGF,EDN1,EREG,F5,CXCL1,CXCL3,ICAM1,IDE,IGF1,IL1A,IL1B,IL8,IL10,IL16,IL18,LAMC1,LTBP2,MFNG,MMP10,NDP,OSM,PEBP1,SERPINE1,PCSK5,SERPINF1,SERPINA1,SERPINB9,PPBP,CCL1,CCL3,CCL15,CCL20,CCL23,CXCL6,CXCL5,SORL1,TFPI,TPSAB1,VEGFA,VEGFB,WNT5A,WNT6,ZP3,CXCL14,EBI3,MERTK,SEMA3C,FBLN5,FGL2,SMPDL3A,FJX1,GREM1,IL19,SULF2,TWSG1,CMTM7,LRG1
GOCCID	GO:0031093	0.000375779	4.67183	2.2864	9	47	platelet alpha granule lumen	CLU,F5,IGF1,SERPINE1,SERPINA1,PPBP,TIMP1,VEGFA,VEGFB
GOCCID	GO:0005759	0.000404531	2.17624	13.3292	27	274	mitochondrial matrix	ACADM,AK4,ATP5D,C1QBP,ECHS1,FXN,NR3C1,IDH2,MCL1,ALDH6A1,PDK3,RAD51,SHMT2,SOD2,PDHX,AKAP1,LRPPRC,TIMM44,HIBADH,MRPL3,MRPL48,MRPS25,MRPS9,NARS2,MTERFD3,TOP1MT,EARS2
GOCCID	GO:0034774	0.000606463	4.32918	2.43234	9	50	secretory granule lumen	CLU,F5,IGF1,SERPINE1,SERPINA1,PPBP,TIMP1,VEGFA,VEGFB
GOCCID	GO:0060205	0.00094179	4.03325	2.57828	9	53	cytoplasmic membrane-bounded vesicle lumen	CLU,F5,IGF1,SERPINE1,SERPINA1,PPBP,TIMP1,VEGFA,VEGFB
GOCCID	GO:0042583	0.00106544	29.438	0.243234	3	5	chromaffin granule	CLU,SYT1,ATP8A1
GOCCID	GO:0043227	0.00114962	1.25063	455.188	498	9357	membrane-bounded organelle	ABCB7,ACADM,ADH5,PARP1,AP2A2,AP1B1,AHCY,AK4,ALDH3A2,BIN1,APEX1,AQP9,ARF4,RND3,ARVCF,ASCL2,ATIC,ATM,ATP5D,ATR,BACH1,BCL6,BCS1L,BLMH,ZFP36L2,C1QBP,C11orf2,TMEM50B,CAT,SERPINH1,CBR3,CCNE1,CCNG1,CD36,CD38,CD40,CD68,CDK4,CDKN1A,CDKN1C,CEBPA,CFL2,RCC1,CLU,PLK3,CSRP1,CSTA,CTSZ,CYP27B1,DBP,DDX1,DKC1,DNASE2,DOCK2,ARID3A,RCAN1,DUSP1,DUSP4,DUSP5,DUSP6,ECHS1,PHC2,CLN8,FBL,ETS2,EZH2,F5,ACSL1,ACSL4,BPTF,FKBP4,…
GOCCID	GO:0031983	0.00123911	3.85742	2.67557	9	55	vesicle lumen	CLU,F5,IGF1,SERPINE1,SERPINA1,PPBP,TIMP1,VEGFA,VEGFB
GOCCID	GO:0043231	0.00131734	1.24681	454.75	497	9348	intracellular membrane-bounded organelle	ABCB7,ACADM,ADH5,PARP1,AP2A2,AP1B1,AHCY,AK4,ALDH3A2,BIN1,APEX1,AQP9,ARF4,RND3,ARVCF,ASCL2,ATIC,ATM,ATP5D,ATR,BACH1,BCL6,BCS1L,BLMH,ZFP36L2,C1QBP,C11orf2,TMEM50B,CAT,SERPINH1,CBR3,CCNE1,CCNG1,CD36,CD38,CD40,CD68,CDK4,CDKN1A,CDKN1C,CEBPA,CFL2,RCC1,CLU,PLK3,CSRP1,CSTA,CTSZ,CYP27B1,DBP,DDX1,DKC1,DNASE2,DOCK2,ARID3A,RCAN1,DUSP1,DUSP4,DUSP5,DUSP6,ECHS1,PHC2,CLN8,FBL,ETS2,EZH2,F5,ACSL1,ACSL4,BPTF,FKBP4,…
GOCCID	GO:0031252	0.00152811	2.10356	11.6752	23	240	cell leading edge	CTTN,FZD2,MYO5A,PTPRM,MTSS1,SRA1,SPRY2,PDPN,PALLD,SWAP70,KANK1,CYFIP1,GABARAPL1,NRBP1,EMR2,ABI3,TNFRSF12A,EVL,INPP5K,APBB1IP,TESC,ENAH,SAMSN1
GOCCID	GO:0019867	0.00173253	2.47311	7.00513	16	144	outer membrane	CYP27B1,ACSL1,ACSL4,GK,MAOB,MCL1,MGST1,PEBP1,PMAIP1,SLC11A1,AKAP1,LRPPRC,SAMM50,LETMD1,GIMAP5,ANKH
GOCCID	GO:0005740	0.00176943	1.71324	24.6152	40	506	mitochondrial envelope	ABCB7,ATP5D,BCS1L,CAT,CLU,CYP27B1,ACSL1,ACSL4,GK,IDH2,MAOB,MCL1,MGST1,NDUFV1,OXA1L,PEBP1,PHB,PMAIP1,SHMT2,SOD2,SRC,AKAP1,TIMM44,AFG3L2,NNT,SAMM50,LETMD1,TIMM9,SLC25A37,GIMAP5,PARL,ADAP2,MRS2,NLN,COQ10B,CHCHD6,COQ10A,SFXN2,SFXN4,SLC25A43
GOCCID	GO:0031228	0.00264859	3.7517	2.43234	8	50	intrinsic to Golgi membrane	GALNT2,MFNG,ST3GAL2,CHST2,ENTPD4,ST3GAL6,ST6GALNAC2,SGMS2
GOCCID	GO:0005829	0.00294039	1.31782	110.525	138	2272	cytosol	ABL2,AP2A2,AP1B1,AHCY,AMPD3,ARHGAP5,ATIC,BACH1,BCAT1,BLMH,CAT,CBR3,CCNE1,CDK4,CDKN1A,CISH,CLU,MAP3K8,AKR1C1,NQO1,DOCK2,DUSP6,EIF2S3,FKBP4,FNTA,FXN,FYB,GALT,GAPDH,GBE1,GK,HSP90AB1,ICA1,IRF8,IDE,IL1A,IL1B,IL18,IMPDH2,IDO1,IRAK1,IRAK2,LDHA,LTA4H,MLLT4,CITED1,MT1A,MT2A,MTHFD1,MYH11,NCF4,NFATC3,PNP,ODC1,PFKFB3,PFKP,PGD,SERPINB9,PIK3C2B,PIK3CG,PLEC,PMAIP1,PPAT,PPP2R5B,PPP3CC,PTPN1,RAP2B,RPL27A,S100A12,…
GOCCID	GO:0030141	0.00385032	1.97273	11.8212	22	243	secretory granule	CD36,CLU,F5,ICA1,IGF1,IL1B,MYO5A,SERPINE1,PCSK5,SERPINA1,PPBP,SCG5,SLC11A1,SNCA,SYT1,TIMP1,VEGFA,VEGFB,ZP3,ATP8A1,NCS1,TRIM36
GOCCID	GO:0001726	0.00419124	2.49179	5.64302	13	116	ruffle	CTTN,MYO5A,MTSS1,SPRY2,PDPN,PALLD,KANK1,CYFIP1,EMR2,TNFRSF12A,INPP5K,TESC,SAMSN1
GOCCID	GO:0031966	0.00434227	1.65161	23.4964	37	483	mitochondrial membrane	ABCB7,ATP5D,BCS1L,CLU,CYP27B1,ACSL1,ACSL4,GK,IDH2,MAOB,MCL1,MGST1,NDUFV1,OXA1L,PEBP1,PHB,PMAIP1,SHMT2,SOD2,SRC,AKAP1,TIMM44,AFG3L2,NNT,SAMM50,LETMD1,TIMM9,SLC25A37,GIMAP5,PARL,MRS2,COQ10B,CHCHD6,COQ10A,SFXN2,SFXN4,SLC25A43
GOCCID	GO:0048471	0.00445201	1.67396	21.9397	35	451	perinuclear region of cytoplasm	APEX1,CCNG1,CLU,GALNT2,GAPDH,ICA1,MT1A,MT1E,MT1G,MT1M,MT2A,MT3,PTPRM,RAD51,RAD51C,SNCA,ZP3,ANP32A,DNAJB6,ABCC5,LRPPRC,CKAP4,CYFIP1,NCS1,RASGRP3,ATXN10,CLIC4,SERBP1,NRBP1,RASD1,INPP5K,CDK5RAP2,SPIRE1,DGAT2,NHLRC1
GOCCID	GO:0044421	0.00504361	1.42054	52.2466	71	1074	extracellular region part	ADM,BMP2,C1QBP,CHI3L2,CLU,VCAN,CTSZ,HBEGF,EDN1,EREG,F5,CXCL1,CXCL3,ICAM1,IDE,IGF1,IL1A,IL1B,IL8,IL10,IL16,IL18,LAMC1,LTBP2,MFNG,MMP1,MMP10,MMP12,MMP19,NDP,OSM,PEBP1,SERPINE1,PCSK5,SERPINF1,SERPINA1,SERPINB9,PPBP,CCL1,CCL3,CCL15,CCL20,CCL23,CXCL6,CXCL5,SNCA,SORL1,TFPI,TIMP1,TIMP2,TPSAB1,VEGFA,VEGFB,WNT5A,WNT6,ZP3,CXCL14,EBI3,MERTK,CRTAP,SEMA3C,FBLN5,FGL2,SMPDL3A,FJX1,GREM1,IL19,SULF2,TWSG1,CMTM7,L…
GOCCID	GO:0005741	0.00521018	2.42081	5.78896	13	119	mitochondrial outer membrane	CYP27B1,ACSL1,ACSL4,GK,MAOB,MCL1,MGST1,PEBP1,PMAIP1,AKAP1,SAMM50,LETMD1,GIMAP5
GOCCID	GO:0030173	0.00722418	3.44309	2.2864	7	47	integral to Golgi membrane	GALNT2,MFNG,ST3GAL2,ENTPD4,ST3GAL6,ST6GALNAC2,SGMS2
GOCCID	GO:0031968	0.00781801	2.21086	6.7619	14	139	organelle outer membrane	CYP27B1,ACSL1,ACSL4,GK,MAOB,MCL1,MGST1,PEBP1,PMAIP1,AKAP1,LRPPRC,SAMM50,LETMD1,GIMAP5
GOCCID	GO:0030027	0.00886448	2.34306	5.49708	12	113	lamellipodium	CTTN,PTPRM,PDPN,PALLD,SWAP70,CYFIP1,NRBP1,ABI3,EVL,APBB1IP,TESC,ENAH
GOCCID	GO:0044464	0.00923813	1.29445	703.626	727	14464	cell part	ABCB7,ABL2,ACADM,ADCY7,ADH5,ADM,ADORA3,PARP1,AP2A2,AP1B1,AHCY,AK4,ALDH3A2,AMPD3,BIN1,AOX1,APEX1,AQP9,ARF4,RND3,ARHGAP5,ARVCF,ASCL2,ATIC,ATM,ATP1B1,ATP5D,ATR,BACH1,BCAT1,BCL6,BCS1L,BLMH,BMP2,ZFP36L2,C1QBP,C11orf2,C18orf1,TMEM50B,CASP5,CAT,SERPINH1,CBR1,CBR3,CCNE1,CCNG1,CD80,CD36,CD38,CD40,CD44,CD48,CD68,CDK4,CDKN1A,CDKN1C,CEBPA,CFL2,RCC1,CISH,CLU,CMKLR1,PLK3,MAP3K8,CSRP1,CSTA,CTSZ,CYP27B1,DBP,AKR1…
GOCCID	GO:0005623	0.00935711	1.29381	703.675	727	14465	cell	ABCB7,ABL2,ACADM,ADCY7,ADH5,ADM,ADORA3,PARP1,AP2A2,AP1B1,AHCY,AK4,ALDH3A2,AMPD3,BIN1,AOX1,APEX1,AQP9,ARF4,RND3,ARHGAP5,ARVCF,ASCL2,ATIC,ATM,ATP1B1,ATP5D,ATR,BACH1,BCAT1,BCL6,BCS1L,BLMH,BMP2,ZFP36L2,C1QBP,C11orf2,C18orf1,TMEM50B,CASP5,CAT,SERPINH1,CBR1,CBR3,CCNE1,CCNG1,CD80,CD36,CD38,CD40,CD44,CD48,CD68,CDK4,CDKN1A,CDKN1C,CEBPA,CFL2,RCC1,CISH,CLU,CMKLR1,PLK3,MAP3K8,CSRP1,CSTA,CTSZ,CYP27B1,DBP,AKR1…
GOCCID	GO:0030667	0.0112543	3.12931	2.48098	7	51	secretory granule membrane	CD36,ICA1,SLC11A1,SNCA,SYT1,ZP3,ATP8A1
GOCCID	GO:0005743	0.0130015	1.66653	16.2967	26	335	mitochondrial inner membrane	ABCB7,ATP5D,BCS1L,IDH2,MAOB,MGST1,NDUFV1,OXA1L,PHB,SHMT2,SOD2,SRC,AKAP1,TIMM44,AFG3L2,NNT,SAMM50,TIMM9,SLC25A37,PARL,MRS2,COQ10B,CHCHD6,COQ10A,SFXN2,SLC25A43
GOCCID	GO:0001652	0.0132815	19.6015	0.194587	2	4	granular component	FBL,SURF6
GOCCID	GO:0031428	0.0132815	19.6015	0.194587	2	4	box C/D snoRNP complex	FBL,NHP2L1
GOCCID	GO:0032009	0.0132815	19.6015	0.194587	2	4	early phagosome	SYK,TLR7
GOCCID	GO:0035189	0.0132815	19.6015	0.194587	2	4	Rb-E2F complex	CEBPA,RB1
GOCCID	GO:0042584	0.0132815	19.6015	0.194587	2	4	chromaffin granule membrane	SYT1,ATP8A1
GOCCID	GO:0002102	0.0141129	7.35675	0.535114	3	11	podosome	SVIL,RHOU,SH3PXD2B
GOCCID	GO:0043233	0.0154476	1.23347	124.487	147	2559	organelle lumen	ACADM,PARP1,AK4,APEX1,ATM,ATP5D,ATR,C1QBP,CAT,SERPINH1,CCNE1,CDK4,CDKN1A,CEBPA,CFL2,RCC1,CLU,PLK3,DDX1,DKC1,DUSP1,DUSP4,DUSP5,DUSP6,ECHS1,FBL,EZH2,F5,FLT3,FXN,KAT2A,NR3C1,GTF2F2,IDE,IDH2,IFI16,IGF1,MCL1,MCM6,ALDH6A1,MSH2,NCL,NFATC3,NHP2L1,NTHL1,P4HA1,SERPINE1,PCSK5,PDK3,PHB,SERPINA1,PLAUR,POLB,PPBP,LGMN,PTGS2,PTPN2,RAD51,RAD51C,RB1,SRSF7,SHMT2,SKIL,SOD2,STAT2,STAT5A,SUPT5H,SURF6,TIMP1,VEGFA,VEGFB…
GOCCID	GO:0031410	0.0165571	1.38076	42.8091	57	880	cytoplasmic vesicle	AP2A2,AP1B1,AHCY,BIN1,ATM,CD36,CLU,F5,HSP90AB1,ICA1,IGF1,IL1B,ITGAV,MT3,MYH11,MYO5A,NCF4,PEBP1,SERPINE1,PCSK5,SERPINF1,SERPINA1,PIK3C2B,PPBP,PTPN1,RAB13,SCG5,SLC2A1,SLC11A1,SNCA,SYK,SYT1,TIMP1,VEGFA,VEGFB,WIPF1,ZP3,ENTPD4,MTSS1,ATP8A1,EHD1,PHLDA1,GGA2,KIF1B,NCS1,GABARAPL1,CLIC4,MYOF,CHIC2,SNX24,TLR7,TRIM36,TP53INP2,CRISPLD2,MAP1LC3A,STXBP5,SPRED2
GOCCID	GO:0031974	0.0167533	1.22812	126.676	149	2604	membrane-enclosed lumen	ACADM,PARP1,AK4,APEX1,ATM,ATP5D,ATR,C1QBP,CAT,SERPINH1,CCNE1,CDK4,CDKN1A,CEBPA,CFL2,RCC1,CLU,PLK3,DDX1,DKC1,DUSP1,DUSP4,DUSP5,DUSP6,ECHS1,FBL,EZH2,F5,FLT3,FXN,KAT2A,NR3C1,GTF2F2,IDE,IDH2,IFI16,IGF1,MCL1,MCM6,ALDH6A1,MSH2,NCL,NFATC3,NHP2L1,NTHL1,P4HA1,SERPINE1,PCSK5,PDK3,PHB,SERPINA1,PLAUR,POLB,PPBP,LGMN,PTGS2,PTPN2,RAD51,RAD51C,RB1,SRSF7,SHMT2,SKIL,SOD2,STAT2,STAT5A,SUPT5H,SURF6,TIMP1,VEGFA,VEGFB…
GOCCID	GO:0005680	0.0171648	4.61904	1.02158	4	21	anaphase-promoting complex	CDC16,MAD2L2,ANAPC5,ANAPC7
GOCCID	GO:0019866	0.0184994	1.59568	17.6101	27	362	organelle inner membrane	ABCB7,ATP5D,BCS1L,IDH2,MAOB,MGST1,NDUFV1,OXA1L,PHB,SHMT2,SOD2,SRC,AKAP1,LRPPRC,TIMM44,AFG3L2,NNT,SAMM50,TIMM9,SLC25A37,PARL,MRS2,COQ10B,CHCHD6,COQ10A,SFXN2,SLC25A43
GOCCID	GO:0000805	0.0214256	13.0668	0.243234	2	5	X chromosome	H2AFY,SIN3B
GOCCID	GO:0043226	0.0226757	1.1633	505.294	533	10387	organelle	ABCB7,ABL2,ACADM,ADH5,PARP1,AP2A2,AP1B1,AHCY,AK4,ALDH3A2,BIN1,APEX1,AQP9,ARF4,RND3,ARVCF,ASCL2,ATIC,ATM,ATP5D,ATR,BACH1,BCL6,BCS1L,BLMH,BMP2,ZFP36L2,C1QBP,C11orf2,TMEM50B,CAT,SERPINH1,CBR3,CCNE1,CCNG1,CD36,CD38,CD40,CD68,CDK4,CDKN1A,CDKN1C,CEBPA,CFL2,RCC1,CLU,PLK3,CSRP1,CSTA,CTSZ,CYP27B1,DBP,DDX1,DKC1,DNASE2,DOCK2,ARID3A,RCAN1,DUSP1,DUSP4,DUSP5,DUSP6,ECHS1,PHC2,CTTN,CLN8,FBL,ETS2,EZH2,F5,ACSL1,AC…
GOCCID	GO:0031982	0.0240553	1.34468	44.6091	58	917	vesicle	AP2A2,AP1B1,AHCY,BIN1,ATM,BMP2,CD36,CLU,F5,HSP90AB1,ICA1,IGF1,IL1B,ITGAV,MT3,MYH11,MYO5A,NCF4,PEBP1,SERPINE1,PCSK5,SERPINF1,SERPINA1,PIK3C2B,PPBP,PTPN1,RAB13,SCG5,SLC2A1,SLC11A1,SNCA,SYK,SYT1,TIMP1,VEGFA,VEGFB,WIPF1,ZP3,ENTPD4,MTSS1,ATP8A1,EHD1,PHLDA1,GGA2,KIF1B,NCS1,GABARAPL1,CLIC4,MYOF,CHIC2,SNX24,TLR7,TRIM36,TP53INP2,CRISPLD2,MAP1LC3A,STXBP5,SPRED2
GOCCID	GO:0031975	0.0243109	1.37072	38.4796	51	791	envelope	ABCB7,PARP1,ATP5D,BCS1L,CAT,CDK4,RCC1,CLU,CYP27B1,ACSL1,ACSL4,GK,IDH2,MAOB,MCL1,MGST1,NDUFV1,OXA1L,PEBP1,PHB,PMAIP1,SHMT2,SLC11A1,SOD2,SRC,AKAP1,NUPL1,LRPPRC,TIMM44,AFG3L2,XPOT,ANKLE2,NNT,SAMM50,LETMD1,MYOF,TIMM9,HIPK2,SLC25A37,TMEM38B,GIMAP5,PARL,ADAP2,MRS2,NLN,COQ10B,CHCHD6,COQ10A,SFXN2,SFXN4,SLC25A43
GOCCID	GO:0031967	0.0274472	1.36333	37.8958	50	779	organelle envelope	ABCB7,PARP1,ATP5D,BCS1L,CAT,CDK4,RCC1,CLU,CYP27B1,ACSL1,ACSL4,GK,IDH2,MAOB,MCL1,MGST1,NDUFV1,OXA1L,PEBP1,PHB,PMAIP1,SHMT2,SOD2,SRC,AKAP1,NUPL1,LRPPRC,TIMM44,AFG3L2,XPOT,ANKLE2,NNT,SAMM50,LETMD1,MYOF,TIMM9,HIPK2,SLC25A37,TMEM38B,GIMAP5,PARL,ADAP2,MRS2,NLN,COQ10B,CHCHD6,COQ10A,SFXN2,SFXN4,SLC25A43
GOCCID	GO:0045335	0.0280355	2.80691	2.33504	6	48	phagocytic vesicle	CD36,ITGAV,NCF4,SLC11A1,SYK,TLR7
GOCCID	GO:0043229	0.0287587	1.15436	504.661	531	10374	intracellular organelle	ABCB7,ABL2,ACADM,ADH5,PARP1,AP2A2,AP1B1,AHCY,AK4,ALDH3A2,BIN1,APEX1,AQP9,ARF4,RND3,ARVCF,ASCL2,ATIC,ATM,ATP5D,ATR,BACH1,BCL6,BCS1L,BLMH,ZFP36L2,C1QBP,C11orf2,TMEM50B,CAT,SERPINH1,CBR3,CCNE1,CCNG1,CD36,CD38,CD40,CD68,CDK4,CDKN1A,CDKN1C,CEBPA,CFL2,RCC1,CLU,PLK3,CSRP1,CSTA,CTSZ,CYP27B1,DBP,DDX1,DKC1,DNASE2,DOCK2,ARID3A,RCAN1,DUSP1,DUSP4,DUSP5,DUSP6,ECHS1,PHC2,CTTN,CLN8,FBL,ETS2,EZH2,F5,ACSL1,ACSL4,B…
GOCCID	GO:0042645	0.029063	3.16739	1.75128	5	36	mitochondrial nucleoid	SHMT2,SOD2,LRPPRC,MTERFD3,TOP1MT
GOCCID	GO:0009986	0.0292619	1.47022	22.5234	32	463	cell surface	BMP2,CD80,CD36,CD38,CD40,CD44,CD48,HBEGF,S1PR1,FLT3,ICAM1,IDE,IL1A,IL2RA,IRAK2,ITGAV,PEBP1,PLAUR,PVRL2,SDC4,SLAMF1,TIMP2,TLR2,VEGFA,WNT5A,WNT6,PKD2L1,CLIC4,GREM1,CLEC2D,TNFRSF12A,SULF2
GOCCID	GO:0016023	0.0296131	1.34778	39.8417	52	819	cytoplasmic membrane-bounded vesicle	AP2A2,AP1B1,AHCY,BIN1,ATM,CD36,CLU,F5,HSP90AB1,ICA1,IGF1,IL1B,ITGAV,MT3,MYH11,MYO5A,NCF4,PEBP1,SERPINE1,PCSK5,SERPINF1,SERPINA1,PIK3C2B,PPBP,RAB13,SCG5,SLC2A1,SLC11A1,SNCA,SYK,SYT1,TIMP1,VEGFA,VEGFB,WIPF1,ZP3,MTSS1,ATP8A1,EHD1,PHLDA1,GGA2,KIF1B,NCS1,CLIC4,MYOF,CHIC2,SNX24,TLR7,TRIM36,CRISPLD2,STXBP5,SPRED2
GOCCID	GO:0031988	0.0306827	1.34057	40.8146	53	839	membrane-bounded vesicle	AP2A2,AP1B1,AHCY,BIN1,ATM,BMP2,CD36,CLU,F5,HSP90AB1,ICA1,IGF1,IL1B,ITGAV,MT3,MYH11,MYO5A,NCF4,PEBP1,SERPINE1,PCSK5,SERPINF1,SERPINA1,PIK3C2B,PPBP,RAB13,SCG5,SLC2A1,SLC11A1,SNCA,SYK,SYT1,TIMP1,VEGFA,VEGFB,WIPF1,ZP3,MTSS1,ATP8A1,EHD1,PHLDA1,GGA2,KIF1B,NCS1,CLIC4,MYOF,CHIC2,SNX24,TLR7,TRIM36,CRISPLD2,STXBP5,SPRED2
GOCCID	GO:0000152	0.0311397	3.7383	1.21617	4	25	nuclear ubiquitin ligase complex	CDC16,MAD2L2,ANAPC5,ANAPC7
GOCCID	GO:0009295	0.0323048	3.06822	1.79993	5	37	nucleoid	SHMT2,SOD2,LRPPRC,MTERFD3,TOP1MT
GOCCID	GO:0043034	0.033682	4.90329	0.729701	3	15	costamere	PLEC,SDC4,SVIL
GOCCID	GO:0005773	0.0388175	1.49365	17.9993	26	370	vacuole	AP1B1,CAT,CD68,CTSZ,DNASE2,MT1A,NAGLU,NCF4,PON2,LGMN,SLC11A1,SRC,TNFAIP3,TTC3,RAB9A,ENTPD4,MMD,GABARAPL1,NAAA,TLR7,GIMAP5,TP53INP2,MAP1LC3A,C1orf85,SLC15A4,TMEM192
GOCCID	GO:0044452	0.040043	3.41281	1.31346	4	27	nucleolar part	FBL,NHP2L1,SURF6,WDR12
GOCCID	GO:0000931	0.0421704	7.83913	0.340527	2	7	gamma-tubulin large complex	TUBGCP4,MZT1
GOCCID	GO:0008274	0.0421704	7.83913	0.340527	2	7	gamma-tubulin ring complex	TUBGCP4,MZT1
GOCCID	GO:0031045	0.0421704	7.83913	0.340527	2	7	dense core granule	SYT1,NCS1
GOCCID	GO:0031092	0.0421704	7.83913	0.340527	2	7	platelet alpha granule membrane	CD36,SNCA
GOCCID	GO:0031090	0.043739	1.19254	110.963	128	2281	organelle membrane	ABCB7,AP2A2,AP1B1,ALDH3A2,RND3,ATP5D,BCS1L,CAT,CD36,CD68,CDK4,RCC1,CLU,CYP27B1,CLN8,ACSL1,ACSL4,SLC37A4,GALNT2,GK,HSD11B1,ICA1,IDH2,IMPDH2,INSIG1,IRAK1,IRAK2,LRMP,MAOB,MCL1,MFNG,MGST1,NDUFV1,OXA1L,PEBP1,PHB,PLAUR,PLP2,PMAIP1,PTGS2,PTPN1,RAB13,RAP2B,SGK1,SHMT2,ST3GAL2,SLC11A1,SNCA,SOD2,SRC,SSR1,SYT1,ZP3,AKAP1,PPAP2B,RAB9A,CHST2,SCAMP1,ENTPD4,HS2ST1,HERPUD1,ARHGAP32,NUPL1,HS3ST3B1,DOPEY2,LRPPRC,DHR…
GOCCID	GO:0005788	0.0461828	1.92855	5.44843	10	112	endoplasmic reticulum lumen	SERPINH1,FLT3,P4HA1,PLAUR,PTGS2,P4HA2,ERO1L,ERAP1,ERAP2,TOR3A
GOCCID	GO:0032587	0.0463265	2.45513	2.62692	6	54	ruffle membrane	SPRY2,PDPN,KANK1,EMR2,INPP5K,TESC
GOCCID	GO:0000307	0.0468584	4.20229	0.826995	3	17	cyclin-dependent protein kinase holoenzyme complex	CCNE1,CDK4,CDKN1A
GOCCID	GO:0001401	0.0486467	Inf	0.0486467	1	1	mitochondrial sorting and assembly machinery complex	SAMM50
GOCCID	GO:0016028	0.0486467	Inf	0.0486467	1	1	rhabdomere	MERTK
GOCCID	GO:0035867	0.0486467	Inf	0.0486467	1	1	alphav-beta3 integrin-IGF-1-IGF1R complex	ITGAV
GOCCID	GO:0070821	0.0486467	Inf	0.0486467	1	1	tertiary granule membrane	SLC11A1
GOCCID	GO:0071953	0.0486467	Inf	0.0486467	1	1	elastic fiber	FBLN5
GOCCID	GO:0044433	0.0493831	1.45474	18.4371	26	379	cytoplasmic vesicle part	AP2A2,AP1B1,CD36,CLU,F5,ICA1,IGF1,SERPINE1,SERPINA1,PPBP,RAB13,SLC11A1,SNCA,SYT1,TIMP1,VEGFA,VEGFB,ZP3,ATP8A1,PHLDA1,KIF1B,CLIC4,MYOF,SNX24,STXBP5,SPRED2
